# Supplementary material for: A system for functional studies of the major virulence factor of malaria parasites
Source: eLife. 2025 Dec 29;13:RP103542. doi: 10.7554/eLife.103542 (PMC12747541; doi:10.7554/eLife.103542)
Supplement: Figure 1—figure supplement 1—source data 1. [file elife-103542-fig1-figsupp1-data1.xlsx]

## Sheet: Sheet1
			Expression level relative to Seryl-t-RNA synthase		Expression level relative to Seryl-t-RNA synthase
var gene			Figure S1A		Figure S1E	Figure S1E
Gene ID	Old gene ID	UPS	3D7 wildtype		3D7var0425800-HA	3D7_MEED_var0425800-HA
PF3D7_0100100	PFA0005w	B	0		0	0
Pf3D7_0421104	PF10_0001	B	0.01		0.01	0.13
Pf3D7_1041300	PF10_0406	B	0		0	0.04
Pf3D7_1100100	PF11_0007	B	0		0	0.51
Pf3D7_1100200	PF11_0008	A	0		0	1.47
Pf3D7_1150400	PF11_0521	A	0		0.03	0.72
Pf3D7_1200400	PFL0020w	B	0		0	0.01
Pf3D7_1200600	PFL0030c	E	0.05		0.01	0.42
Pf3D7_1219300	PFL0935c	B	0.18		0.22	0.23
Pf3D7_1240300	PFL1950w	B	0.03		0	0.66
Pf3D7_1240600	PFL1960w	C	0.05		0	0.49
Pf3D7_1240400/Pf3D7_1240900	PFL1955w/PFL1970w	B	0.18		0.01	0.25
Pf3D7_1255200	PFL2665c	B	0		0	0.08
Pf3D7_1200100	PFL0005w	B	0		0	0.07
Pf3D7_1373500	PF13_0364	B	0		0	0.33
Pf3D7_1300300	PF13_0003	A	0		0	0.2
Pf3D7_0223500	PFB1055c	B	0		0	0.21
Pf3D7_0200100	PFB0010w	B	0		0	0.25
Pf3D7_0324900	PFC1120c	B	0		0	0.16
Pf3D7_0300100	PFC0005w	B	0		0	0
Pf3D7_0400400	PFD0020c	A	0		0	0.09
Pf3D7_0412400	PFD0615c	C	0.17		0.01	0.15
Pf3D7_0412700	PFD0625c	C	0		0	0.21
Pf3D7_0412900/Pf3D7_0413100	PFD0630c/PFD0635c	C	0		0	0.02
Pf3D7_0400100	PFD0005w	B	0.01		0.01	0.4
Pf3D7_0420900	PFD1000c	C	0.32		0.04	13.83
Pf3D7_0421300	PFD1015c	C	0.16		0.01	2.97
Pf3D7_0425800	PFD1235w	A	0		3.05	11.63
Pf3D7_0426000	PFD1245c	B	0		0	0.04
PF3D7_0533100	PFE1640w	A	0		0	0.03
Pf3D7_0500100	PFE0005w	B	0		0	0
Pf3D7_0617400	MAL6P1.252	C	0.03		0	0.11
Pf3D7_0800200	PF08_0141	A	0		0	0.29
Pf3D7_0800100	PF08_0142	B	0		0	0.18
Pf3D7_0632500	MAL6P1.4	B	0.01		0	3.76
Pf3D7_0711700	PF07_0048	C	0.02		0	0.07
Pf3D7_0712400	PF07_0050	B	0.01		0	0.08
Pf3D7_0712000	PF07_0049	C	0.02		0	0.35
Pf3D7_0712900	MAL7P1.56	C	0		0	0.08
Pf3D7_0712800	MAL7P1.55	B	0.01		0.01	1.13
Pf3D7_0712600	PF07_0051	C	0.19		0	0.13
Pf3D7_0733000	PF07_0139	B	0.01		0	0.76
Pf3D7_0421100	PFD1005c	B	4.26		0.18	1.33
Pf3D7_0808700	PF08_0106	B	2.06		0.11	0.17
Pf3D7_0937800	PFI1830c	B	0.01		0	0.39
Pf3D7_0808600	PF08_0107	C	0.09		0.01	0.08
PF3D7_0600400	MAL6P1.314	A	0		0	0
Pf3D7_1300100	PF13_0001	B	0		0	0.11
Pf3D7_0809100	PF08_0103	B	6.19		1.04	0.25
Pf3D7_0632800	MAL6P1.1	B	0		0	0.27
Pf3D7_0600200	MAL6P1.316	B	0		0	0
Pf3D7_0420700	PFD0995c	C	0.03		0	0.2
Pf3D7_0937600	PFI1820w	A	0.02		0.01	0.16
Pf3D7_0100300	PFA0015c	A	0		0	0
Pf3D7_0800300	PF08_0140	B	0		0	0.11
Pf3D7_0712300	MAL7P1.50	B	0		0	0.14
Pf3D7_0900100	PFI0005w	B	0.01		0	0
Pf3D7_0115700	PFA0765c	B	0		0	0.08
Percent
PF3D7_0100100			0		0	0
Pf3D7_0421104			0.0707714		0.210084	0.283657
Pf3D7_1041300			0		0	0.0872791
Pf3D7_1100100			0		0	1.11281
Pf3D7_1100200			0		0	3.20751
Pf3D7_1150400			0		0.630252	1.57102
Pf3D7_1200400			0		0	0.0218198
Pf3D7_1200600			0.353857		0.210084	0.91643
Pf3D7_1219300			1.27389		4.62185	0.501855
Pf3D7_1240300			0.212314		0	1.4401
Pf3D7_1240600			0.353857		0	1.06917
Pf3D7_1240400/Pf3D7_1240900			1.27389		0.210084	0.545494
Pf3D7_1255200			0		0	0.174558
Pf3D7_1200100			0		0	0.152738
Pf3D7_1373500			0		0	0.720052
Pf3D7_1300300			0		0	0.436395
Pf3D7_0223500			0		0	0.458215
Pf3D7_0200100			0		0	0.545494
Pf3D7_0324900			0		0	0.349116
Pf3D7_0300100			0		0	0
Pf3D7_0400400			0		0	0.196378
Pf3D7_0412400			1.20311		0.210084	0.327297
Pf3D7_0412700			0		0	0.458215
Pf3D7_0412900/Pf3D7_0413100			0		0	0.0436395
Pf3D7_0400100			0.0707714		0.210084	0.872791
Pf3D7_0420900			2.26469		0.840336	30.1767
Pf3D7_0421300			1.13234		0.210084	6.48047
Pf3D7_0425800			0		64.0756	25.3764
Pf3D7_0426000			0		0	0.0872791
PF3D7_0533100			0		0	0.0654593
Pf3D7_0500100			0		0	0
Pf3D7_0617400			0.212314		0	0.240017
Pf3D7_0800200			0		0	0.632773
Pf3D7_0800100			0		0	0.392756
Pf3D7_0632500			0.0707714		0	8.20423
Pf3D7_0711700			0.141543		0	0.152738
Pf3D7_0712400			0.0707714		0	0.174558
Pf3D7_0712000			0.141543		0	0.763692
Pf3D7_0712900			0		0	0.174558
Pf3D7_0712800			0.0707714		0.210084	2.46563
Pf3D7_0712600			1.34466		0	0.283657
Pf3D7_0733000			0.0707714		0	1.6583
Pf3D7_0421100			30.1486		3.78151	2.90203
Pf3D7_0808700			14.5789		2.31092	0.370936
Pf3D7_0937800			0.0707714		0	0.850971
Pf3D7_0808600			0.636943		0.210084	0.174558
PF3D7_0600400			0		0	0
Pf3D7_1300100			0		0	0.240017
Pf3D7_0809100			43.8075		21.8487	0.545494
Pf3D7_0632800			0		0	0.589134
Pf3D7_0600200			0		0	0
Pf3D7_0420700			0.212314		0	0.436395
Pf3D7_0937600			0.141543		0.210084	0.349116
Pf3D7_0100300			0		0	0
Pf3D7_0800300			0		0	0.240017
Pf3D7_0712300			0		0	0.305477
Pf3D7_0900100			0.0707714		0	0
Pf3D7_0115700			0		0	0.174558
