# Supplementary material for: A system for functional studies of the major virulence factor of malaria parasites
Source: eLife. 2025 Dec 29;13:RP103542. doi: 10.7554/eLife.103542 (PMC12747541; doi:10.7554/eLife.103542)
Supplement: Figure 1—figure supplement 1—source data 4. [file elife-103542-fig1-figsupp1-data4.xlsx]

## Sheet: Sheet1
			Expression level relative to Seryl-t-RNA synthase
var gene			Figure S1I	Figure S1I		Rif gene	Figure S1I	Figure S1I
Gene ID	Old gene ID	UPS	3D7rif0425700-HA	3D7rif1254800-HA		Gene ID	3D7rif0425700-HA	3D7rif1254800-HA	Percent
PF3D7_0100100	PFA0005w	B	0	0		MAL13P1.2	0	0	0	0
Pf3D7_0421104	PF10_0001	B	0	0.01		MAL13P1.4	0	0	0	0
Pf3D7_1041300	PF10_0406	B	0	0		MAL13P1.495	0	0	0	0
Pf3D7_1100100	PF11_0007	B	0	0		MAL13P1.500	0.000431007	0	1.31146	0
Pf3D7_1100200	PF11_0008	A	0	0.01		MAL13P1.515	0	0	0	0
Pf3D7_1150400	PF11_0521	A	0.07	0		MAL13P1.520	0	0	0	0
Pf3D7_1200400	PFL0020w	B	0	0		MAL13P1.530	0	0	0	0
Pf3D7_1200600	PFL0030c	E	0.01	0		MAL13P1.535	8.81304e-05	0	0.268161	0
Pf3D7_1219300	PFL0935c	B	0.01	0.03		MAL7P1.184	0	0	0	0
Pf3D7_1240300	PFL1950w	B	0	0.04		MAL7P1.185	0	0	0	0
Pf3D7_1240600	PFL1960w	C	0	0		MAL7P1.200	3.15938e-05	0	0.0961328	0
Pf3D7_1240400/Pf3D7_1240900	PFL1955w/PFL1970w	B	0.01	0		MAL7P1.213	0	0	0	0
Pf3D7_1255200	PFL2665c	B	0	0		MAL7P1.215	0	0	0	0
Pf3D7_1200100	PFL0005w	B	0	0		MAL7P1.216	1.49448e-05	0	0.0454736	0
Pf3D7_1373500	PF13_0364	B	0	0		MAL7P1.217	0	0	0	0
Pf3D7_1300300	PF13_0003	A	0	0		MAL7P1.219	0	0	0	0
Pf3D7_0223500	PFB1055c	B	0	0		MAL7P1.222	0.000239116	0	0.727577	0
Pf3D7_0200100	PFB0010w	B	0	0		MAL7P1.57	6.10352e-05	0	0.185716	0
Pf3D7_0324900	PFC1120c	B	0	0		MAL8P1.208 and PFD0015c	0.00141009	0	4.29058	0
Pf3D7_0300100	PFC0005w	B	0	0		MAL8P1.218	0.00374713	0	11.4017	0
Pf3D7_0400400	PFD0020c	A	0	0		MAL8P1.219	0.00031992	0	0.973446	0
Pf3D7_0412400	PFD0615c	C	0	0		PF07_0003	0.000274672	0	0.835767	0
Pf3D7_0412700	PFD0625c	C	0	0		PF07_0132	0	0	0	0
Pf3D7_0412900/Pf3D7_0413100	PFD0630c/PFD0635c	C	0	0		PF07_0134	0	0	0	0
Pf3D7_0400100	PFD0005w	B	0.01	0.06		PF07_0138	0	0	0	0
Pf3D7_0420900	PFD1000c	C	0.03	0.07		PF08_0104	9.77869e-05	0.01	0.297543	26.5532
Pf3D7_0421300	PFD1015c	C	0.01	0.04		PF08_0105	0.000232578	0	0.707682	0
Pf3D7_0425800	PFD1235w	A	1.31	0		PF08_0138	0.00114535	0	3.48503	0
Pf3D7_0426000	PFD1245c	B	0	0		PF08_0139 and PFI1825w	0.0209051	0.01	63.6096	26.5532
PF3D7_0533100	PFE1640w	A	0	0		PF10_0002	0.00188659	0	5.74048	0
Pf3D7_0500100	PFE0005w	B	0	0		PF10_0003	0.00621513	0	18.9112	0
Pf3D7_0617400	MAL6P1.252	C	0	0		PF10_0004	0.000144164	0	0.438659	0
Pf3D7_0800200	PF08_0141	A	0	0		PF10_0005	0.000838443	0	2.55119	0
Pf3D7_0800100	PF08_0142	B	0	0		PF10_0006	0.0109722	0.01	33.386	26.5532
Pf3D7_0632500	MAL6P1.4	B	0.01	0.01		PF10_0393 and PFB1000w	0.000354974	0	1.08011	0
Pf3D7_0711700	PF07_0048	C	0.08	0.01		PF10_0394	1.32835e-05	0	0.0404189	0
Pf3D7_0712400	PF07_0050	B	0	0		PF10_0396	0.000147193	0	0.447876	0
Pf3D7_0712000	PF07_0049	C	0.02	0.01		PF10_0397	5.89561e-05	0	0.17939	0
Pf3D7_0712900	MAL7P1.56	C	0	0		PF10_0398	7.94276e-05	0	0.24168	0
Pf3D7_0712800	MAL7P1.55	B	0.01	0.03		PF10_0399	0	0	0	0
Pf3D7_0712600	PF07_0051	C	0	0		PF10_0400	4.40652e-05	0	0.134081	0
Pf3D7_0733000	PF07_0139	B	0	0		PF10_0401	0.00026902	0	0.818567	0
Pf3D7_0421100	PFD1005c	B	0.02	0.03		PF10_0402	0.000145167	0	0.44171	0
Pf3D7_0808700	PF08_0106	B	0.01	0.02		PF10_0403	6.96267e-05	0	0.211858	0
Pf3D7_0937800	PFI1830c	B	0	0		PF10_0404	0.000282395	0	0.859263	0
Pf3D7_0808600	PF08_0107	C	0	0		PF10_0405	0.000302663	0	0.920936	0
PF3D7_0600400	MAL6P1.314	A	0	0		PF11_0009	0.000443125	0	1.34833	0
Pf3D7_1300100	PF13_0001	B	0.01	0.01		PF11_0010	0	0	0	0
Pf3D7_0809100	PF08_0103	B	0.01	0.64		PF11_0020	0.00494436	0	15.0446	0
Pf3D7_0632800	MAL6P1.1	B	0	0		PF11_0021	0.00232267	0	7.06736	0
Pf3D7_0600200	MAL6P1.316	B	0	0		PF11_0515	0.00583925	0	17.7675	0
Pf3D7_0420700	PFD0995c	C	0	0		PF11_0517	9.71114e-05	0	0.295488	0
Pf3D7_0937600	PFI1820w	A	0	0		PF11_0519	0.000227791	0	0.693118	0
Pf3D7_0100300	PFA0015c	A	0	0		PF11_0520	2.46168e-05	0	0.0749033	0
Pf3D7_0800300	PF08_0140	B	0	0		PF11_0529	0.00104665	0	3.18473	0
Pf3D7_0712300	MAL7P1.50	B	0	0		PF13_0004	0	0	0	0
Pf3D7_0900100	PFI0005w	B	0	0		PF13_0005	0	0	0	0
Pf3D7_0115700	PFA0765c	B	0	0		PF13_0006	0	0	0	0
						PF14_0002	0.00344806	0	10.4917	0
Percent						PF14_0003	2.49604e-05	0	0.0759489	0
PF3D7_0100100			0	0		PF14_0004	0.000112328	0	0.341788	0
Pf3D7_0421104			0	0.980392		PF14_0005	0.000206725	0	0.629018	0
Pf3D7_1041300			0	0		PF14_0006	0.000455583	0	1.38624	0
Pf3D7_1100100			0	0		PF14_0008	0.000132658	0	0.403649	0
Pf3D7_1100200			0	0.980392		PF14_0766	5.0268e-05	0	0.152954	0
Pf3D7_1150400			4.29448	0		PF14_0768	0.000225435	0	0.685949	0
Pf3D7_1200400			0	0		PF14_0769	0.000510784	0	1.5542	0
Pf3D7_1200600			0.613497	0		PF14_0770	0.000188258	0	0.572827	0
Pf3D7_1219300			0.613497	2.94118		PF14_0772	0.00046677	0	1.42028	0
Pf3D7_1240300			0	3.92157		PFA0010c	0.00282997	0	8.61095	0
Pf3D7_1240600			0	0		PFA0020w	0.00450268	0	13.7006	0
Pf3D7_1240400/Pf3D7_1240900			0.613497	0		PFA0030c	0.000517914	0	1.5759	0
Pf3D7_1255200			0	0		PFA0040w	0.000167332	0	0.509153	0
Pf3D7_1200100			0	0		PFA0045c	0.000186958	0	0.568871	0
Pf3D7_1373500			0	0		PFA0050c	0.000105901	0	0.322232	0
Pf3D7_1300300			0	0		PFA0080c	0.00101451	0	3.08693	0
Pf3D7_0223500			0	0		PFA0095c	9.15551e-05	0	0.278582	0
Pf3D7_0200100			0	0		PFA0710c	0	0	0	0
Pf3D7_0324900			0	0		PFA0740w	0	0	0	0
Pf3D7_0300100			0	0		PFA0745w	0	0	0	0
Pf3D7_0400400			0	0		PFA0760w	0.000239946	0	0.730103	0
Pf3D7_0412400			0	0		PFB0015c	0.000979953	0	2.98178	0
Pf3D7_0412700			0	0		PFB0030c	1.91141e-05	0	0.0581601	0
Pf3D7_0412900/Pf3D7_0413100			0	0		PFB0035w	0.000119973	0	0.365052	0
Pf3D7_0400100			0.613497	5.88235		PFB0040c	0	0	0	0
Pf3D7_0420900			1.84049	6.86275		PFB0055c	0	0	0	0
Pf3D7_0421300			0.613497	3.92157		PFB0060w	0.000628848	0	1.91344	0
Pf3D7_0425800			80.3681	0		PFB1005w	0.000114291	3.00974e-05	0.347762	0.0799182
Pf3D7_0426000			0	0		PFB1010w	0.000145671	1.94743e-06	0.443244	0.00517105
PF3D7_0533100			0	0		PFB1015w	0	8.16606e-05	0	0.216835
Pf3D7_0500100			0	0		PFB1035w	4.94044e-05	0.000904871	0.150327	2.40272
Pf3D7_0617400			0	0		PFB1040w	0.00123181	0.000609536	3.74813	1.61851
Pf3D7_0800200			0	0		PFB1050w	0.000330056	0.000151332	1.00429	0.401835
Pf3D7_0800100			0	0		PFC0010c	0.0101316	0.000766195	30.8281	2.03449
Pf3D7_0632500			0.613497	0.980392		PFC0030c	5.48176e-05	0	0.166798	0
Pf3D7_0711700			4.90798	0.980392		PFC0035w	0.000228582	0.000110781	0.695524	0.294159
Pf3D7_0712400			0	0		PFC0040w	0	0.000265316	0	0.704499
Pf3D7_0712000			1.22699	0.980392		PFC1095w	0	2.49604e-05	0	0.0662778
Pf3D7_0712900			0	0		PFC1100w	1.99258e-05	0	0.0606299	0
Pf3D7_0712800			0.613497	2.94118		PFC1115w	0.00650155	0.000700173	19.7828	1.85918
Pf3D7_0712600			0	0		PFD0025w	0.000268089	9.13604e-06	0.815735	0.0242591
Pf3D7_0733000			0	0		PFD0030c	0.0026041	0.000622344	7.92369	1.65252
Pf3D7_0421100			1.22699	2.94118		PFD0040c	0.00550516	0.000753033	16.751	1.99954
Pf3D7_0808700			0.613497	1.96078		PFD0045c	7.75239e-05	0	0.235888	0
Pf3D7_0937800			0	0		PFD0050w	1.5962e-05	0	0.0485688	0
Pf3D7_0808600			0	0		PFD0055w	0.000216252	0	0.658006	0
PF3D7_0600400			0	0		PFD0060w	0.00253289	0.000105901	7.70702	0.281201
Pf3D7_1300100			0.613497	0.980392		PFD0070c	0.0288557	0.00817254	87.8014	21.7007
Pf3D7_0809100			0.613497	62.7451		PFD0640c	0.000211801	0	0.644464	0
Pf3D7_0632800			0	0		PFD0645w	0.000953156	2.40267e-05	2.90024	0.0637986
Pf3D7_0600200			0	0		PFD1010w	0.00018311	0	0.557163	0
Pf3D7_0420700			0	0		PFD1020c	0.00251539	0.000126814	7.65378	0.336732
Pf3D7_0937600			0	0		PFD1230c	0.354781	0	1079.52	0
Pf3D7_0100300			0	0		PFD1240w	0.00360696	3.54692e-06	10.9752	0.00941821
Pf3D7_0800300			0	0		PFE0020c	0.00101451	0	3.08693	0
Pf3D7_0712300			0	0		PFE0025c	0.000768855	2.70315e-05	2.33945	0.0717773
Pf3D7_0900100			0	0		PFE1630w	0.000633222	0	1.92675	0
Pf3D7_0115700			0	0		PFF0015c	0.000144665	0.000197618	0.440182	0.524739
													PFF0025w	0.000395235	8.0816e-05	1.20261	0.214592
													PFF0035c	0.000118322	1.32376e-05	0.360026	0.0351501
													PFF0855c	0.000669328	8.78255e-05	2.03661	0.233205
													PFF1545w	0	0	0	0
													PFF1555w	0	0	0	0
													PFF1560c	0	0	0	0
													PFF1565c	0	0	0	0
													PFF1570w	0.00577886	0.00320602	17.5838	8.51301
													PFF1575w	4.48355e-05	0.000210338	0.136424	0.558515
													PFF1590w	0.000198992	2.97861e-05	0.605489	0.0790916
													PFI0010c	0.00223579	0	6.80301	0
													PFI0015c	0.000264398	0	0.804504	0
													PFI0020w	0.000133119	0	0.40505	0
													PFI0025c	0.000562835	0.00020177	1.71258	0.535764
													PFI0030c	0.00056675	1.50167e-06	1.72449	0.00398741
													PFI0035c	8.3088e-05	0	0.252818	0
													PFI0050c	0.000211801	6.47392e-05	0.644464	0.171903
													PFI0055c	0.000774203	2.5047e-05	2.35573	0.0665078
													PFI0065w	0.000146684	0	0.446327	0
													PFI0070w	0	3.51772e-05	0	0.0934067
													PFI0075w	0.000818347	0.000321031	2.49005	0.85244
													PFI1805w	0.00746832	0.000697751	22.7244	1.85275
													PFI1810w	0.000379135	4.80535e-05	1.15362	0.127597
													PFI1815c	0.00894316	0.00185418	27.212	4.92345
													PFL0010c	0.000339336	4.01825e-06	1.03252	0.0106697
													PFL0015c	0.000149766	0	0.455705	0
													PFL0025c	0.000853099	0	2.59579	0
													PFL2585c	0	3.6671e-05	0	0.0973732
													PFL2605w	0.000192214	4.39715e-06	0.584864	0.0116758
													PFL2615w	0.000664704	0.000167332	2.02255	0.44432
													PFL2625w	0.000307953	4.83877e-05	0.937033	0.128485
													PFL2630w	0.000293368	0.000371333	0.892654	0.986008
													PFL2640c	0.000140709	0.000277543	0.428145	0.736965
													PFL2645c	0.000130379	0.0298733	0.396714	79.3231
													PFL2655w	0	0	0	0
													PFL2660w	0	0	0	0
													PF11_0011	0	0	0	0
													MAL13P1.2	0	0
													MAL13P1.4	0	0
													MAL13P1.495	0	0
													MAL13P1.500	1.31146	0
													MAL13P1.515	0	0
													MAL13P1.520	0	0
													MAL13P1.530	0	0
													MAL13P1.535	0.268161	0
													MAL7P1.184	0	0
													MAL7P1.185	0	0
													MAL7P1.200	0.0961328	0
													MAL7P1.213	0	0
													MAL7P1.215	0	0
													MAL7P1.216	0.0454736	0
													MAL7P1.217	0	0
													MAL7P1.219	0	0
													MAL7P1.222	0.727577	0
													MAL7P1.57	0.185716	0
													MAL8P1.208 and PFD0015c	4.29058	0
													MAL8P1.218	11.4017	0
													MAL8P1.219	0.973446	0
													PF07_0003	0.835767	0
													PF07_0132	0	0
													PF07_0134	0	0
													PF07_0138	0	0
													PF08_0104	0.297543	26.5532
													PF08_0105	0.707682	0
													PF08_0138	3.48503	0
													PF08_0139 and PFI1825w	63.6096	26.5532
													PF10_0002	5.74048	0
													PF10_0003	18.9112	0
													PF10_0004	0.438659	0
													PF10_0005	2.55119	0
													PF10_0006	33.386	26.5532
													PF10_0393 and PFB1000w	1.08011	0
													PF10_0394	0.0404189	0
													PF10_0396	0.447876	0
													PF10_0397	0.17939	0
													PF10_0398	0.24168	0
													PF10_0399	0	0
													PF10_0400	0.134081	0
													PF10_0401	0.818567	0
													PF10_0402	0.44171	0
													PF10_0403	0.211858	0
													PF10_0404	0.859263	0
													PF10_0405	0.920936	0
													PF11_0009	1.34833	0
													PF11_0010	0	0
													PF11_0020	15.0446	0
													PF11_0021	7.06736	0
													PF11_0515	17.7675	0
													PF11_0517	0.295488	0
													PF11_0519	0.693118	0
													PF11_0520	0.0749033	0
													PF11_0529	3.18473	0
													PF13_0004	0	0
													PF13_0005	0	0
													PF13_0006	0	0
													PF14_0002	10.4917	0
													PF14_0003	0.0759489	0
													PF14_0004	0.341788	0
													PF14_0005	0.629018	0
													PF14_0006	1.38624	0
													PF14_0008	0.403649	0
													PF14_0766	0.152954	0
													PF14_0768	0.685949	0
													PF14_0769	1.5542	0
													PF14_0770	0.572827	0
													PF14_0772	1.42028	0
													PFA0010c	8.61095	0
													PFA0020w	13.7006	0
													PFA0030c	1.5759	0
													PFA0040w	0.509153	0
													PFA0045c	0.568871	0
													PFA0050c	0.322232	0
													PFA0080c	3.08693	0
													PFA0095c	0.278582	0
													PFA0710c	0	0
													PFA0740w	0	0
													PFA0745w	0	0
													PFA0760w	0.730103	0
													PFB0015c	2.98178	0
													PFB0030c	0.0581601	0
													PFB0035w	0.365052	0
													PFB0040c	0	0
													PFB0055c	0	0
													PFB0060w	1.91344	0
													PFB1005w	0.347762	0.0799182
													PFB1010w	0.443244	0.00517105
													PFB1015w	0	0.216835
													PFB1035w	0.150327	2.40272
													PFB1040w	3.74813	1.61851
													PFB1050w	1.00429	0.401835
													PFC0010c	30.8281	2.03449
													PFC0030c	0.166798	0
													PFC0035w	0.695524	0.294159
													PFC0040w	0	0.704499
													PFC1095w	0	0.0662778
													PFC1100w	0.0606299	0
													PFC1115w	19.7828	1.85918
													PFD0025w	0.815735	0.0242591
													PFD0030c	7.92369	1.65252
													PFD0040c	16.751	1.99954
													PFD0045c	0.235888	0
													PFD0050w	0.0485688	0
													PFD0055w	0.658006	0
													PFD0060w	7.70702	0.281201
													PFD0070c	87.8014	21.7007
													PFD0640c	0.644464	0
													PFD0645w	2.90024	0.0637986
													PFD1010w	0.557163	0
													PFD1020c	7.65378	0.336732
													PFD1230c	1079.52	0
													PFD1240w	10.9752	0.00941821
													PFE0020c	3.08693	0
													PFE0025c	2.33945	0.0717773
													PFE1630w	1.92675	0
													PFF0015c	0.440182	0.524739
													PFF0025w	1.20261	0.214592
													PFF0035c	0.360026	0.0351501
													PFF0855c	2.03661	0.233205
													PFF1545w	0	0
													PFF1555w	0	0
													PFF1560c	0	0
													PFF1565c	0	0
													PFF1570w	17.5838	8.51301
													PFF1575w	0.136424	0.558515
													PFF1590w	0.605489	0.0790916
													PFI0010c	6.80301	0
													PFI0015c	0.804504	0
													PFI0020w	0.40505	0
													PFI0025c	1.71258	0.535764
													PFI0030c	1.72449	0.00398741
													PFI0035c	0.252818	0
													PFI0050c	0.644464	0.171903
													PFI0055c	2.35573	0.0665078
													PFI0065w	0.446327	0
													PFI0070w	0	0.0934067
													PFI0075w	2.49005	0.85244
													PFI1805w	22.7244	1.85275
													PFI1810w	1.15362	0.127597
													PFI1815c	27.212	4.92345
													PFL0010c	1.03252	0.0106697
													PFL0015c	0.455705	0
													PFL0025c	2.59579	0
													PFL2585c	0	0.0973732
													PFL2605w	0.584864	0.0116758
													PFL2615w	2.02255	0.44432
													PFL2625w	0.937033	0.128485
													PFL2630w	0.892654	0.986008
													PFL2640c	0.428145	0.736965
													PFL2645c	0.396714	79.3231
													PFL2655w	0	0
													PFL2660w	0	0
													PF11_0011	0	0
