# Supplementary material for: A system for functional studies of the major virulence factor of malaria parasites
Source: eLife. 2025 Dec 29;13:RP103542. doi: 10.7554/eLife.103542 (PMC12747541; doi:10.7554/eLife.103542)
Supplement: Figure 1—source data 1. [file elife-103542-fig1-data1.xlsx]

## Sheet: Sheet1
			Expression level relative to Seryl-t-RNA synthase		Expression level relative to Seryl-t-RNA synthase
var gene			Figure 1E	Figure 1E	Figure 1F	Figure 1F
Gene ID	Old gene ID	UPS	3D7var0809100-HA +G418	3D7var0809100-HA -G418	3D7var2csa-HA +G418	3D7var2csa-HA -G418
PF3D7_0100100	PFA0005w	B	0	0.1	0	0.01
Pf3D7_0421104	PF10_0001	B	0	0	0	0
Pf3D7_1041300	PF10_0406	B	0	0	0.01	0.02
Pf3D7_1100100	PF11_0007	B	0.02	0.13	0.05	0.09
Pf3D7_1100200	PF11_0008	A	0	0	0	0.01
Pf3D7_1150400	PF11_0521	A	0	0.04	0	0.05
Pf3D7_1200400	PFL0020w	B	0.02	0.09	0.01	0.03
Pf3D7_1200600	PFL0030c	E	0.01	0.01	7.81	2.05
Pf3D7_1219300	PFL0935c	B	0	0	0	0
Pf3D7_1240300	PFL1950w	B	0.01	0.05	0.02	0.03
Pf3D7_1240600	PFL1960w	C	0	0	0	0
Pf3D7_1240400/Pf3D7_1240900	PFL1955w/PFL1970w	B	0	0	0.01	0.01
Pf3D7_1255200	PFL2665c	B	0	0.01	0	0.01
Pf3D7_1200100	PFL0005w	B	0	0.02	0	0
Pf3D7_1373500	PF13_0364	B	0.01	0.04	0.01	0.02
Pf3D7_1300300	PF13_0003	A	0	0.01	0	0.01
Pf3D7_0223500	PFB1055c	B	0	0	0	0
Pf3D7_0200100	PFB0010w	B	0.01	0.05	0.03	0.03
Pf3D7_0324900	PFC1120c	B	0	0	0	0
Pf3D7_0300100	PFC0005w	B	0	0	0	0
Pf3D7_0400400	PFD0020c	A	0	0.01	0	0
Pf3D7_0412400	PFD0615c	C	0	0.01	0	0
Pf3D7_0412700	PFD0625c	C	0	0	0.03	0
Pf3D7_0412900/Pf3D7_0413100	PFD0630c/PFD0635c	C	0	0	0	0
Pf3D7_0400100	PFD0005w	B	0.05	0.08	0.07	0.2
Pf3D7_0420900	PFD1000c	C	0.01	0.02	0.01	0.02
Pf3D7_0421300	PFD1015c	C	0.03	0.99	0.02	0.18
Pf3D7_0425800	PFD1235w	A	0	0	0	0
Pf3D7_0426000	PFD1245c	B	0	0	0	0
PF3D7_0533100	PFE1640w	A	0.35	0.56	0.08	0.34
Pf3D7_0500100	PFE0005w	B	0	0.01	0	0
Pf3D7_0617400	MAL6P1.252	C	0	0.01	0	0
Pf3D7_0800200	PF08_0141	A	0.01	0.01	0.01	0.02
Pf3D7_0800100	PF08_0142	B	0.01	0.03	0.01	0.02
Pf3D7_0632500	MAL6P1.4	B	0.01	0.38	0.01	0.09
Pf3D7_0711700	PF07_0048	C	0	0.04	0	0
Pf3D7_0712400	PF07_0050	B	0	0	0	0
Pf3D7_0712000	PF07_0049	C	0	0.2	0.01	0.02
Pf3D7_0712900	MAL7P1.56	C	0	0.04	0	0.01
Pf3D7_0712800	MAL7P1.55	B	0	0.04	0	0.03
Pf3D7_0712600	PF07_0051	C	0	0	0	0
Pf3D7_0733000	PF07_0139	B	0.03	0.05	0.06	0.13
Pf3D7_0421100	PFD1005c	B	0.01	0	0.04	0.03
Pf3D7_0808700	PF08_0106	B	0.01	0.05	0.01	0.04
Pf3D7_0937800	PFI1830c	B	0.01	0.04	0.02	0.02
Pf3D7_0808600	PF08_0107	C	0	0.02	0	0.01
PF3D7_0600400	MAL6P1.314	A	0	0	0	0
Pf3D7_1300100	PF13_0001	B	0	0.21	0.01	0.03
Pf3D7_0809100	PF08_0103	B	4.72	3.8	0.1	0.19
Pf3D7_0632800	MAL6P1.1	B	0	0.01	0	0
Pf3D7_0600200	MAL6P1.316	B	0	0	0.01	0
Pf3D7_0420700	PFD0995c	C	0	0.02	0	0.01
Pf3D7_0937600	PFI1820w	A	0.02	0.02	0.01	0.03
Pf3D7_0100300	PFA0015c	A	0	0.04	0	0.01
Pf3D7_0800300	PF08_0140	B	0	0	0	0
Pf3D7_0712300	MAL7P1.50	B	0	0	0	0
Pf3D7_0900100	PFI0005w	B	0	0	0	0
Pf3D7_0115700	PFA0765c	B	0	0.01	0	0
Percent
PF3D7_0100100			0	1.37931	0	0.263158
Pf3D7_0421104			0	0	0	0
Pf3D7_1041300			0	0	0.118203	0.526316
Pf3D7_1100100			0.373832	1.7931	0.591017	2.36842
Pf3D7_1100200			0	0	0	0.263158
Pf3D7_1150400			0	0.551724	0	1.31579
Pf3D7_1200400			0.373832	1.24138	0.118203	0.789474
Pf3D7_1200600			0.186916	0.137931	92.3168	53.9474
Pf3D7_1219300			0	0	0	0
Pf3D7_1240300			0.186916	0.689655	0.236407	0.789474
Pf3D7_1240600			0	0	0	0
Pf3D7_1240400/Pf3D7_1240900			0	0	0.118203	0.263158
Pf3D7_1255200			0	0.137931	0	0.263158
Pf3D7_1200100			0	0.275862	0	0
Pf3D7_1373500			0.186916	0.551724	0.118203	0.526316
Pf3D7_1300300			0	0.137931	0	0.263158
Pf3D7_0223500			0	0	0	0
Pf3D7_0200100			0.186916	0.689655	0.35461	0.789474
Pf3D7_0324900			0	0	0	0
Pf3D7_0300100			0	0	0	0
Pf3D7_0400400			0	0.137931	0	0
Pf3D7_0412400			0	0.137931	0	0
Pf3D7_0412700			0	0	0.35461	0
Pf3D7_0412900/Pf3D7_0413100			0	0	0	0
Pf3D7_0400100			0.934579	1.10345	0.827423	5.26316
Pf3D7_0420900			0.186916	0.275862	0.118203	0.526316
Pf3D7_0421300			0.560748	13.6552	0.236407	4.73684
Pf3D7_0425800			0	0	0	0
Pf3D7_0426000			0	0	0	0
PF3D7_0533100			6.54206	7.72414	0.945626	8.94737
Pf3D7_0500100			0	0.137931	0	0
Pf3D7_0617400			0	0.137931	0	0
Pf3D7_0800200			0.186916	0.137931	0.118203	0.526316
Pf3D7_0800100			0.186916	0.413793	0.118203	0.526316
Pf3D7_0632500			0.186916	5.24138	0.118203	2.36842
Pf3D7_0711700			0	0.551724	0	0
Pf3D7_0712400			0	0	0	0
Pf3D7_0712000			0	2.75862	0.118203	0.526316
Pf3D7_0712900			0	0.551724	0	0.263158
Pf3D7_0712800			0	0.551724	0	0.789474
Pf3D7_0712600			0	0	0	0
Pf3D7_0733000			0.560748	0.689655	0.70922	3.42105
Pf3D7_0421100			0.186916	0	0.472813	0.789474
Pf3D7_0808700			0.186916	0.689655	0.118203	1.05263
Pf3D7_0937800			0.186916	0.551724	0.236407	0.526316
Pf3D7_0808600			0	0.275862	0	0.263158
PF3D7_0600400			0	0	0	0
Pf3D7_1300100			0	2.89655	0.118203	0.789474
Pf3D7_0809100			88.2243	52.4138	1.18203	5
Pf3D7_0632800			0	0.137931	0	0
Pf3D7_0600200			0	0	0.118203	0
Pf3D7_0420700			0	0.275862	0	0.263158
Pf3D7_0937600			0.373832	0.275862	0.118203	0.789474
Pf3D7_0100300			0	0.551724	0	0.263158
Pf3D7_0800300			0	0	0	0
Pf3D7_0712300			0	0	0	0
Pf3D7_0900100			0	0	0	0
Pf3D7_0115700			0	0.137931	0	0
