# Supplementary material for: A system for functional studies of the major virulence factor of malaria parasites
Source: eLife. 2025 Dec 29;13:RP103542. doi: 10.7554/eLife.103542 (PMC12747541; doi:10.7554/eLife.103542)
Supplement: Figure 1—source data 6. [file elife-103542-fig1-data6.xlsx]

## Sheet: DEG
symbol	ensembl_ID	User_ID	baseMean	MEEDVAR0425800HA-VAR0425800HA_log2FC	MEEDVAR0425800HA-VAR0425800HA_adjPval	Gene name	Product description
PF3D7_0936900	PF3D7_0936900	PF3D7_0936900	2098.29	-7.99533	2.52308e-37	0	Plasmodium exported protein (PHISTb), unknown function, pseudogene	36.5981
PF3D7_1240600	Q8I519	PF3D7_1240600	1764.34	6.93373	1.94425e-23	VAR	erythrocyte membrane protein 1, PfEMP1	22.7112
PF3D7_1240400	Q8I520	PF3D7_1240400	177.349	5.88093	2.15682e-17	VAR	erythrocyte membrane protein 1, PfEMP1	16.6662
PF3D7_0102200	Q8I0U6	PF3D7_0102200	17825	4.44798	7.57516e-17	RESA	ring-infected erythrocyte surface antigen	16.1206
PF3D7_0712300	Q8IBX1	PF3D7_0712300	508.195	6.10369	2.04653e-16	VAR	erythrocyte membrane protein 1, PfEMP1	15.689
PF3D7_1200600	Q8I639	PF3D7_1200600	906.4	4.59372	6.30452e-16	VAR2CSA	erythrocyte membrane protein 1, PfEMP1	15.2003
PF3D7_1240900	A0A144A1K0	PF3D7_1240900	3967.71	4.90114	1.52884e-14	VAR	erythrocyte membrane protein 1, PfEMP1	13.8156
PF3D7_0202100	O96125	PF3D7_0202100	1235.21	4.65748	1.90458e-14	LSAP2	liver stage associated protein 2	13.7202
PF3D7_1150400	Q8IHM0	PF3D7_1150400	749.386	6.08133	3.2235e-14	VAR	erythrocyte membrane protein 1, PfEMP1	13.4917
PF3D7_0711700	Q8IBX3	PF3D7_0711700	255.296	4.70356	9.50903e-14	VAR	erythrocyte membrane protein 1, PfEMP1	13.0219
PF3D7_0712400	Q8IBX0	PF3D7_0712400	309.199	5.91664	1.43359e-13	VAR	erythrocyte membrane protein 1, PfEMP1	12.8436
PF3D7_1149500	PF3D7_1149500	PF3D7_1149500	173.885	-6.23207	1.4367e-13	RESA2	ring-infected erythrocyte surface antigen 2, pseudogene	12.8426
PF3D7_1300100	Q8IEV1	PF3D7_1300100	125.989	6.53139	6.69597e-13	VAR	erythrocyte membrane protein 1, PfEMP1	12.1742
PF3D7_0324100	O97307	PF3D7_0324100	87.6981	6.88612	3.32439e-12	MC-2TM	Pfmc-2TM Maurer's cleft two transmembrane protein	11.4783
PF3D7_0412700	Q9U0G5	PF3D7_0412700	175.094	4.35303	3.37323e-12	VAR	erythrocyte membrane protein 1, PfEMP1	11.472
PF3D7_1200100	Q8I643	PF3D7_1200100	194.134	4.61496	4.13193e-12	VAR	erythrocyte membrane protein 1, PfEMP1	11.3838
PF3D7_0301300	Q9Y013	PF3D7_0301300	192.565	-9.87947	9.76784e-12	EH1	epoxide hydrolase 1	11.0102
PF3D7_1041300	Q8IIZ6	PF3D7_1041300	149.055	5.16216	9.94056e-12	VAR	erythrocyte membrane protein 1, PfEMP1	11.0026
PF3D7_0223100	O96292	PF3D7_0223100	89.3217	6.90646	1.49963e-11	RIF	rifin	10.824
PF3D7_1000800	PF3D7_1000800	PF3D7_1000800	130.524	-8.39311	4.04266e-11	N/A	stevor, pseudogene	10.3933
PF3D7_0712000	Q8IBX2	PF3D7_0712000	370.952	4.77344	1.3244e-10	VAR	erythrocyte membrane protein 1, PfEMP1	9.87798
PF3D7_0800200	Q8IAK2	PF3D7_0800200	169.869	5.20107	1.78241e-10	VAR	erythrocyte membrane protein 1, PfEMP1	9.74899
PF3D7_1240300	Q8I521	PF3D7_1240300	441.777	4.82569	2.19089e-10	VAR	erythrocyte membrane protein 1, PfEMP1	9.65938
PF3D7_0712900	Q8IBW7	PF3D7_0712900	151.512	4.66799	2.19089e-10	VAR	erythrocyte membrane protein 1, PfEMP1	9.65938
PF3D7_0712600	Q8IBW9	PF3D7_0712600	163.025	5.16634	2.90585e-10	VAR	erythrocyte membrane protein 1, PfEMP1	9.53673
PF3D7_0425100	Q8IFL4	PF3D7_0425100	86.8674	5.23155	2.93388e-10	N/A	Plasmodium exported protein (hyp6), unknown function	9.53256
PF3D7_1255200	Q8I4N5	PF3D7_1255200	138.213	4.74717	3.19186e-10	VAR	erythrocyte membrane protein 1, PfEMP1	9.49596
PF3D7_0421300	Q8IFQ2	PF3D7_0421300	368.328	4.88611	5.64995e-10	VAR	erythrocyte membrane protein 1, PfEMP1	9.24796
PF3D7_0632700	C6KTF8	PF3D7_0632700	82.3614	5.74169	7.14005e-10	RIF	rifin	9.1463
PFA0635c	Q9U0M8	PF3D7_0113300	1149.64	3.55476	8.23591e-10	N/A	Plasmodium exported protein (hyp1), unknown function	9.08429
PF3D7_0412400	Q9U0G6	PF3D7_0412400	865.615	4.37401	9.77551e-10	VAR	erythrocyte membrane protein 1, PfEMP1	9.00986
PF3D7_0202000	Q9TY99	PF3D7_0202000	93570	4.47735	1.78691e-09	KAHRP	knob-associated histidine-rich protein	8.7479
PF3D7_0900200	Q8I3E4	PF3D7_0900200	59.9922	4.94234	1.78691e-09	RIF	rifin	8.7479
PF3D7_0425200	Q8IFL3	PF3D7_0425200	70.3901	4.62804	1.94042e-09	N/A	Plasmodium exported protein (hyp15), unknown function	8.7121
PF3D7_1372500	PF3D7_1372500	PF3D7_1372500	405.344	5.6433	2.19449e-09	N/A	stevor, pseudogene	8.65867
PF3D7_0324300	PF3D7_0324300	PF3D7_0324300	64.8333	6.14836	2.77595e-09	EPF4	exported protein family 4	8.55659
PF3D7_0400400	Q8I218	PF3D7_0400400	154.196	4.97505	5.13763e-09	VAR	erythrocyte membrane protein 1, PfEMP1	8.28924
PF3D7_1219300	Q8I5L5	PF3D7_1219300	196.549	3.82866	5.89521e-09	VAR	erythrocyte membrane protein 1, PfEMP1	8.2295
PF3D7_1372100	C0H5M8	PF3D7_1372100	56.2944	6.56573	8.20574e-09	GEXP04	Plasmodium exported protein (PHISTb), unknown function	8.08588
PF3D7_0800100	Q8IAK1	PF3D7_0800100	158.975	5.50774	9.46609e-09	VAR	erythrocyte membrane protein 1, PfEMP1	8.02383
PF3D7_1150300	Q8IHM1	PF3D7_1150300	46.0402	6.33162	1.07814e-08	RIF	rifin	7.96733
PF3D7_1040200	Q8IJ07	PF3D7_1040200	94.8105	4.12701	1.35602e-08	N/A	stevor	7.86773
PF3D7_0301200	C0H466	PF3D7_0301200	48.151	-8.84502	4.81606e-08	FIKK3	serine/threonine protein kinase, FIKK family	7.31731
PF3D7_0808900	Q8IAS6	PF3D7_0808900	38.2476	-8.51049	5.27203e-08	RIF	rifin	7.27802
PF3D7_0900400	Q8I3E2	PF3D7_0900400	40.0309	4.77814	6.43725e-08	RIF	rifin	7.1913
PF3D7_0300100	O97324	PF3D7_0300100	62.6524	-7.30213	1.05906e-07	VAR	erythrocyte membrane protein 1, PfEMP1	6.97508
PF3D7_0808600	Q8IAS3	PF3D7_0808600	93.609	3.3324	1.14224e-07	VAR	erythrocyte membrane protein 1, PfEMP1	6.94224
PF3D7_1219400	PF3D7_1219400	PF3D7_1219400	1347.39	5.00365	1.34678e-07	VAR	erythrocyte membrane protein 1 (PfEMP1), pseudogene	6.8707
PF3D7_0700100	A0A143ZY53	PF3D7_0700100	47.2065	5.33103	3.60562e-07	VAR	erythrocyte membrane protein 1, PfEMP1	6.44302
PF3D7_1300400	Q8IEU8	PF3D7_1300400	25.7328	8.38305	4.19502e-07	RIF	rifin	6.37727
PF3D7_0201900	O96124	PF3D7_0201900	7078.14	4.07505	5.04453e-07	EMP3	erythrocyte membrane protein 3	6.29718
PF3D7_0713100	Q8IBW5	PF3D7_0713100	139.63	4.85401	5.04453e-07	MC-2TM	Pfmc-2TM Maurer's cleft two transmembrane protein	6.29718
PF3D7_0421100	Q8IFQ4	PF3D7_0421100	50.5921	5.03325	5.04453e-07	VAR	erythrocyte membrane protein 1, PfEMP1	6.29718
PF3D7_0808800	Q8IAS5	PF3D7_0808800	47.4264	-7.00551	8.35132e-07	RIF	rifin	6.07824
PF3D7_0900600	Q8I3E0	PF3D7_0900600	31.377	5.77236	1.25727e-06	RIF	rifin	5.90057
PF3D7_0115600	Q8I2C5	PF3D7_0115600	34.8338	6.9102	1.47555e-06	RIF	rifin	5.83105
PF3D7_0900100	Q8I3E5	PF3D7_0900100	53.1088	4.07737	1.76727e-06	VAR	erythrocyte membrane protein 1, PfEMP1	5.7527
PF3D7_1240100	Q8I522	PF3D7_1240100	197.488	2.79109	2.3344e-06	ETRAMP12	early transcribed membrane protein 12	5.63183
PF3D7_1478400	PF3D7_1478400	PF3D7_1478400	39.5319	5.0239	2.38732e-06	N/A	Plasmodium exported protein, unknown function, pseudogene	5.62209
PF3D7_0712800	Q8IBW8	PF3D7_0712800	124.86	4.38143	3.66457e-06	VAR	erythrocyte membrane protein 1, PfEMP1	5.43598
PF3D7_0533100	PF3D7_0533100	PF3D7_0533100	34.0347	5.8159	3.88797e-06	VAR1CSA	erythrocyte membrane protein 1 (PfEMP1), pseudogene	5.41028
PF3D7_1300200	Q8IEV0	PF3D7_1300200	32.6993	5.75583	4.41598e-06	RIF	rifin	5.35497
PF3D7_0420700	Q8IFQ6	PF3D7_0420700	75.7366	4.47791	5.59952e-06	VAR	erythrocyte membrane protein 1, PfEMP1	5.25185
PF3D7_0425050	PF3D7_0425050	PF3D7_0425050	43.5741	3.85954	6.90624e-06	N/A	Plasmodium exported protein, unknown function, pseudogene	5.16076
PF3D7_1478100	Q8IK54	PF3D7_1478100	27.4865	5.49859	2.49655e-05	N/A	Plasmodium exported protein (hyp13), unknown function	4.60266
PF3D7_1000100	Q8IK37	PF3D7_1000100	267.061	2.78064	3.02793e-05	VAR	erythrocyte membrane protein 1, PfEMP1	4.51885
PF3D7_0101400	PF3D7_0101400	PF3D7_0101400	14.3176	7.54205	4.04819e-05	EPF1	exported protein family 1, pseudogene	4.39274
PF3D7_0831750	PF3D7_0831750	PF3D7_0831750	28.816	4.52549	4.09169e-05	N/A	Plasmodium exported protein (PHISTa), unknown function, pseudogene	4.3881
PF3D7_0800900	PF3D7_0800900	PF3D7_0800900	62.5019	3.65503	4.27224e-05	N/A	Plasmodium exported protein (hyp7), unknown function, pseudogene	4.36934
PF3D7_0222600	O96289	PF3D7_0222600	27.9074	5.9555	4.27224e-05	RIF	rifin	4.36934
PF3D7_0700800	A0A143ZWD4	PF3D7_0700800	29.4295	3.82336	4.62091e-05	MC-2TM	Pfmc-2TM Maurer's cleft two transmembrane protein	4.33527
PF3D7_0223500	O96296	PF3D7_0223500	406.945	4.25798	5.07671e-05	VAR	erythrocyte membrane protein 1, PfEMP1	4.29442
PF3D7_1200500	Q8I0E0	PF3D7_1200500	29.469	4.26001	5.28432e-05	RIF	rifin	4.27701
PF3D7_1301300	PF3D7_1301300	PF3D7_1301300	13.428	7.44654	6.80844e-05	N/A	Plasmodium exported protein (PHISTa-like), unknown function, pseudogene	4.16695
PF3D7_0500800	Q8I492	PF3D7_0500800	19798.8	2.86233	7.65886e-05	MESA	mature parasite-infected erythrocyte surface antigen	4.11584
PF3D7_1240700	PF3D7_1240700	PF3D7_1240700	12.5661	7.34754	0.000101	RIF	rifin, pseudogene	3.99568
PF3D7_0300200	O97325	PF3D7_0300200	18.2726	-7.44868	0.000142	RIF	rifin	3.84771
PF3D7_0420900	Q8IFQ5	PF3D7_0420900	20.4092	6.11371	0.00015	VAR	erythrocyte membrane protein 1, PfEMP1	3.82391
PF3D7_1478900	PF3D7_1478900	PF3D7_1478900	13.9696	-7.05831	0.00016	N/A	non-coding RNA	3.79588
PF3D7_0900300	Q8I3E3	PF3D7_0900300	27.9217	4.88032	0.000187	RIF	rifin	3.72816
PF3D7_0113600	PF3D7_0113600	PF3D7_0113600	98.1985	2.86339	0.000195	SURF1.2	surface-associated interspersed protein 1.2 (SURFIN 1.2), pseudogene	3.70997
PF3D7_0500100	Q8I495	PF3D7_0500100	20.0998	6.09269	0.000195	VAR	erythrocyte membrane protein 1, PfEMP1	3.70997
PF3D7_1002000	Q8IK16	PF3D7_1002000	367.251	2.61244	0.000199	N/A	Plasmodium exported protein (hyp2), unknown function	3.70115
PF3D7_0425900	Q8IFK8	PF3D7_0425900	100.084	-2.73091	0.000227	RIF	rifin	3.64397
PF3D7_0808700	Q8IAS4	PF3D7_0808700	175.418	2.32044	0.000227	VAR	erythrocyte membrane protein 1, PfEMP1	3.64397
PF3D7_1200400	Q8I640	PF3D7_1200400	33.5639	3.94112	0.000227	VAR	erythrocyte membrane protein 1, PfEMP1	3.64397
PF3D7_1040100	Q8IJ08	PF3D7_1040100	18.5237	5.97009	0.000284	RIF	rifin	3.54668
PF3D7_0324000	PF3D7_0324000	PF3D7_0324000	37.3335	4.67246	0.0003	EPF1	exported protein family 1	3.52288
PF3D7_0223400	O96295	PF3D7_0223400	26.1214	3.95092	0.000312	RIF	rifin	3.50585
PF3D7_0631300	Q8I0Q0	PF3D7_0631300	11.0021	7.15655	0.000339	EPF1	exported protein family 1	3.4698
PF3D7_1240500	PF3D7_1240500	PF3D7_1240500	10.6808	7.11704	0.000339	N/A	Plasmodium RNA of unknown function RUF6	3.4698
PF3D7_0413100	Q8I1V6	PF3D7_0413100	17.9895	5.92291	0.000374	VAR	erythrocyte membrane protein 1, PfEMP1	3.42713
PF3D7_1200700	Q8I638	PF3D7_1200700	10715.2	2.43619	0.000377	ACS7	acyl-CoA synthetase	3.42366
PF3D7_0800300	Q8IAK3	PF3D7_0800300	258.54	2.84363	0.000381	VAR	erythrocyte membrane protein 1, PfEMP1	3.41908
PF3D7_0220800	O96279	PF3D7_0220800	223.915	-3.49612	0.000514	CLAG2	cytoadherence linked asexual protein 2	3.28904
PF3D7_1036300	Q8IJ45	PF3D7_1036300	25.6331	-4.98391	0.000528	DBLMSP2	duffy binding-like merozoite surface protein 2	3.27737
PF3D7_0202200	Q8I669	PF3D7_0202200	2038.36	2.30357	0.00058	PTP1	EMP1-trafficking protein	3.23657
PF3D7_1200610	A0A144A041	PF3D7_1200610	18.5772	4.6339	0.00072	N/A	VAR2CSA uORF	3.14267
PF3D7_0830500	Q8IBD1	PF3D7_0830500	7976.6	2.21661	0.000755	TryThrA	sporozoite and liver stage tryptophan-rich protein, putative	3.12205
PF3D7_0114100	B9ZSJ3	PF3D7_0114100	18.3518	4.45613	0.000891	MC-2TM	Pfmc-2TM Maurer's cleft two transmembrane protein	3.05012
PF3D7_1149400	Q8IHM9	PF3D7_1149400	785.767	-2.31519	0.000924	N/A	Plasmodium exported protein, unknown function	3.03433
PF3D7_0731200	Q8IBF0	PF3D7_0731200	329.504	2.17448	0.000924	N/A	Plasmodium exported protein, unknown function	3.03433
PFA0170c	Q8I2A6	PF3D7_0103400	1420.54	-2.1671	0.001022	N/A	zinc-carboxypeptidase, putative	2.99055
PF3D7_1373400	C0H5N9	PF3D7_1373400	16.561	5.80252	0.001119	RIF	rifin	2.95117
PF3D7_1000700	PF3D7_1000700	PF3D7_1000700	28.3538	-3.72312	0.001337	N/A	Plasmodium exported protein (PHISTa), unknown function, pseudogene	2.87387
PF3D7_0833400	A0A146M1Z3	PF3D7_0833400	34.7329	4.25191	0.001337	RIF	rifin	2.87387
PF3D7_1410400	Q8ILZ1	PF3D7_1410400	899.138	-3.4283	0.001512	RAP1	rhoptry-associated protein 1	2.82045
PF3D7_0732900	Q8IBD9	PF3D7_0732900	22.2119	3.97942	0.001512	RIF	rifin	2.82045
PF3D7_0425500	Q8IFL0	PF3D7_0425500	943.279	-2.11699	0.00164	N/A	stevor	2.78516
RH5	Q8IFM5	PF3D7_0424100	231.649	-2.09124	0.001663	RH5	reticulocyte binding protein homologue 5	2.77911
PF3D7_0219700	O96272	PF3D7_0219700	506.414	2.14621	0.001897	GEXP20	Plasmodium exported protein (PHISTc), unknown function	2.72193
PF3D7_0902300	Q8I3C5	PF3D7_0902300	1406.51	2.03742	0.002384	FIKK9.4	serine/threonine protein kinase, FIKK family	2.62269
PF3D7_0817700	C0H4V4	PF3D7_0817700	210.052	-3.20277	0.002495	RON5	rhoptry neck protein 5	2.60293
PF3D7_1300300	Q8IEU9	PF3D7_1300300	390.667	5.76083	0.002592	VAR	erythrocyte membrane protein 1, PfEMP1	2.58637
PF3D7_1040300	Q8IJ06	PF3D7_1040300	15.7805	4.15321	0.002632	RIF	rifin	2.57971
PF3D7_0103100	Q8I2A9	PF3D7_0103100	97.8641	-2.30726	0.002916	VPS51	vacuolar protein sorting-associated protein 51, putative	2.53521
PF3D7_1476600	Q8IK70	PF3D7_1476600	167.229	1.96588	0.002917	N/A	Plasmodium exported protein, unknown function	2.53506
PF3D7_1302050	A0A5K1K810	PF3D7_1302050	175.69	2.5132	0.002943	N/A	hypothetical protein	2.53121
PF3D7_0103500	B9ZSI1	PF3D7_0103500	118.963	-2.16747	0.002951	N/A	conserved Plasmodium protein, unknown function	2.53003
PF3D7_0701100	A0A143ZWN4	PF3D7_0701100	27.3545	3.01218	0.003091	RIF	rifin	2.5099
PF3D7_0814500	Q8IAY2	PF3D7_0814500	449.13	2.36109	0.004029	N/A	conserved protein, unknown function	2.3948
PF3D7_0618000	C6KT20	PF3D7_0618000	141.222	-3.37884	0.004505	N/A	conserved Plasmodium membrane protein, unknown function	2.34631
PF3D7_1219500	PF3D7_1219500	PF3D7_1219500	12.7827	4.42474	0.004508	VAR	erythrocyte membrane protein 1 (PfEMP1), exon 2, pseudogene	2.34602
PF3D7_0707300	C0H4M0	PF3D7_0707300	1532.06	-3.28977	0.004673	RAMA	rhoptry-associated membrane antigen	2.3304
PF3D7_1468400	A0A144A3J8	PF3D7_1468400	46.8307	-3.1753	0.004828	CZIF1	C3H1-type zinc finger protein CZIF1	2.31623
PF3D7_1477800	Q8IK57	PF3D7_1477800	16.1141	3.7069	0.004976	ACBP	acyl-CoA binding protein	2.30312
PF3D7_1254300	Q8I4P4	PF3D7_1254300	7.2364	6.56125	0.005816	N/A	stevor	2.23538
PF3D7_0102500	Q8I2B4	PF3D7_0102500	1231.92	-3.04674	0.00673	EBA181	erythrocyte binding antigen-181	2.17198
PF3D7_0101600	Q8I2C1	PF3D7_0101600	14.715	4.12643	0.00673	RIF	rifin	2.17198
PF3D7_0421200	Q8IFQ3	PF3D7_0421200	7.0933	6.52322	0.00673	RIF	rifin	2.17198
PF3D7_0402000	Q8I206	PF3D7_0402000	4819.22	-1.92942	0.006829	N/A	Plasmodium exported protein (PHISTa), unknown function	2.16564
PF3D7_1126700	Q8II97	PF3D7_1126700	327.757	-3.09127	0.006829	ATG23	conserved Plasmodium protein, unknown function	2.16564
PF3D7_0401900	Q8I0V8	PF3D7_0401900	127.08	-2.45024	0.007002	ACS6	acyl-CoA synthetase	2.15478
PF3D7_0101500	PF3D7_0101500	PF3D7_0101500	26.803	4.00116	0.007261	VAR	erythrocyte membrane protein 1 (PfEMP1), exon 2, pseudogene	2.139
PF3D7_0425800	Q8I098	PF3D7_0425800	81136.5	1.99315	0.007465	VAR	erythrocyte membrane protein 1, PfEMP1	2.12697
PF3D7_0413400	PF3D7_0413400	PF3D7_0413400	75.5459	2.38526	0.007465	VAR	erythrocyte membrane protein 1 (PfEMP1), exon 1, pseudogene	2.12697
PF3D7_1243900	Q8I4Z1	PF3D7_1243900	255.634	-2.71862	0.007739	DOC2	double C2-like domain-containing protein	2.11132
PF3D7_1200800	Q8I637	PF3D7_1200800	337.593	1.97618	0.008012	FIKK12	serine/threonine protein kinase, FIKK family	2.09626
PF3D7_0221700	A0A143ZYC7	PF3D7_0221700	33.2634	2.57684	0.009068	N/A	Plasmodium exported protein, unknown function	2.04249
PF3D7_0425600	PF3D7_0425600	PF3D7_0425600	318.171	-1.99695	0.009075	RIF	rifin, pseudogene	2.04215
PF3D7_1252600	Q8I4R0	PF3D7_1252600	570.016	1.85033	0.010559	N/A	esterase, putative	1.97638
PF3D7_0400200	PF3D7_0400200	PF3D7_0400200	511.274	-1.94986	0.012102	N/A	erythrocyte membrane protein 1 (PfEMP1), exon 2, pseudogene	1.91714
PF3D7_1253300	PF3D7_1253300	PF3D7_1253300	747.467	1.79319	0.012102	N/A	Plasmodium exported protein (PHISTa), unknown function, pseudogene	1.91714
PF3D7_0210800	O96190	PF3D7_0210800	239.399	1.80351	0.012102	N/A	conserved Plasmodium protein, unknown function	1.91714
PF3D7_0101100	O97308	PF3D7_0101100	6.19859	6.32022	0.012259	EPF4	exported protein family 4	1.91154
PF3D7_0725400	Q8IBJ7	PF3D7_0725400	354.468	-2.87867	0.012636	N/A	conserved Plasmodium protein, unknown function	1.89839
PF3D7_0733000	Q8IBD8	PF3D7_0733000	566.55	5.52645	0.013448	VAR	erythrocyte membrane protein 1, PfEMP1	1.87134
PF3D7_1352900	Q8IDH1	PF3D7_1352900	2049.27	2.03662	0.013506	N/A	Plasmodium exported protein, unknown function	1.86947
PF3D7_1002100	Q8IK15	PF3D7_1002100	4029.33	1.95893	0.013721	PTP5	EMP1-trafficking protein	1.86261
PF3D7_0221900	PF3D7_0221900	PF3D7_0221900	8.43622	5.78163	0.014651	N/A	erythrocyte membrane protein 1 (PfEMP1), pseudogene	1.83413
PF3D7_0919300	Q8I2W0	PF3D7_0919300	200.372	-3.16799	0.015203	TrxL1	thioredoxin-like protein 1, putative	1.81807
PF3D7_0201700	O96122	PF3D7_0201700	2464.51	1.894	0.01527	N/A	DnaJ protein, putative	1.81616
PF3D7_0909500	Q8I357	PF3D7_0909500	22.1391	-3.92284	0.01527	SPM1	subpellicular microtubule protein 1, putative	1.81616
PF3D7_1012200	Q8IJS3	PF3D7_1012200	121.503	-2.99748	0.015512	RA	rhoptry associated adhesin	1.80933
PF3D7_0103600	Q8I2A4	PF3D7_0103600	498.17	-1.70886	0.017768	PSH1	ATP-dependent DNA/RNA helicase PSH1	1.75036
PF3D7_1102900	Q8IIX2	PF3D7_1102900	82.3693	2.26753	0.018467	N/A	Plasmodium exported protein (hyp11), unknown function	1.7336
PF3D7_0302300	PF3D7_0302300	PF3D7_0302300	2752.26	4.68064	0.018568	N/A	erythrocyte membrane protein 1 (PfEMP1), pseudogene	1.73123
PF3D7_0722200	Q8IBN1	PF3D7_0722200	528.937	-2.85177	0.019276	RALP1	rhoptry-associated leucine zipper-like protein 1	1.71498
PF3D7_1221400	Q8I5J9	PF3D7_1221400	33.0054	-3.00372	0.020361	IMC1h	inner membrane complex protein 1h, putative	1.6912
PF3D7_1240000	Q8I523	PF3D7_1240000	377.716	1.63653	0.020396	N/A	3-hydroxyisobutyryl-CoA hydrolase, putative	1.69045
PF3D7_1145200	Q8IHR5	PF3D7_1145200	379.056	-2.89412	0.021047	N/A	serine/threonine protein kinase, putative	1.67681
PF3D7_0905400	Q8I395	PF3D7_0905400	2475.26	-2.82015	0.02117	RhopH3	high molecular weight rhoptry protein 3	1.67428
PF3D7_1478000	Q8IK55	PF3D7_1478000	33.4189	3.14825	0.02326	GEXP17	Plasmodium exported protein (PHISTa), unknown function	1.63339
PF3D7_1016800	Q8IJN0	PF3D7_1016800	1410.97	1.70235	0.024942	N/A	Plasmodium exported protein (PHISTc), unknown function	1.60307
PF3D7_1116000	Q8IIK5	PF3D7_1116000	320.14	-2.75952	0.024942	RON4	rhoptry neck protein 4	1.60307
PF3D7_1476300	Q8IK74	PF3D7_1476300	183.181	-2.9933	0.025186	N/A	Plasmodium exported protein (PHISTb), unknown function	1.59884
PF3D7_0604100	C6KSN9	PF3D7_0604100	253.834	-2.94775	0.025249	SIP2	AP2 domain transcription factor	1.59776
PF3D7_1102500	Q8IIX5	PF3D7_1102500	766.247	1.63158	0.025826	GEXP02	gametocyte exported protein 2	1.58794
PF3D7_1252900	Q8I4Q7	PF3D7_1252900	216.477	1.95409	0.026291	N/A	Plasmodium exported protein, unknown function	1.58019
PF3D7_1254200	Q8I4P5	PF3D7_1254200	10.741	4.1635	0.026291	RIF	rifin	1.58019
PF3D7_1251200	Q8I4S2	PF3D7_1251200	699.456	-2.80456	0.026376	N/A	coronin	1.57879
PF3D7_1323700	Q8IE80	PF3D7_1323700	234.434	-2.68756	0.026376	GAPM1	glideosome associated protein with multiple membrane spans 1	1.57879
PF3D7_1206100	A0A144A134	PF3D7_1206100	22.3459	-3.10201	0.026376	ISN1	IMP-specific 5'-nucleotidase 1	1.57879
PF3D7_0108500	Q8I257	PF3D7_0108500	7336.67	1.65261	0.026645	N/A	ELM2 domain-containing protein, putative	1.57438
PF3D7_0936700	Q8I2F3	PF3D7_0936700	82.6076	-2.3803	0.026898	N/A	lysophospholipase, putative	1.57028
PF3D7_0701400	PF3D7_0701400	PF3D7_0701400	18.6346	3.78735	0.026898	EPF4	exported protein family 4, pseudogene	1.57028
PF3D7_1035300	Q8IJ56	PF3D7_1035300	163.052	-2.68216	0.02736	GLURP	glutamate-rich protein GLURP	1.56288
PF3D7_0426000	Q8IFK7	PF3D7_0426000	119.647	2.10657	0.027622	VAR	erythrocyte membrane protein 1, PfEMP1	1.55874
PF3D7_0108600	Q8I256	PF3D7_0108600	7381.38	1.63341	0.027662	N/A	DnaJ domain-containing protein, putative	1.55812
PF3D7_1013800	Q8IJQ7	PF3D7_1013800	236.804	-2.39919	0.02873	N/A	conserved Plasmodium protein, unknown function	1.54166
PF3D7_1372600	C0H5N2	PF3D7_1372600	107.236	6.02475	0.028845	RIF	rifin	1.53993
PF3D7_0214900	O96229	PF3D7_0214900	673.49	-2.63003	0.028997	RON6	rhoptry neck protein 6	1.53765
PF3D7_1444500	Q8IL26	PF3D7_1444500	1008.06	1.57875	0.029326	eIK1	eukaryotic translation initiation factor 2-alpha kinase 1	1.53275
PF3D7_0324900	O97312	PF3D7_0324900	287.914	1.52794	0.029326	VAR	erythrocyte membrane protein 1, PfEMP1	1.53275
PF3D7_1028700	Q8IJB7	PF3D7_1028700	610.918	-2.33638	0.030153	MTRAP	merozoite TRAP-like protein	1.52067
PF3D7_1435600	Q8ILA8	PF3D7_1435600	124.88	-2.68335	0.030153	N/A	conserved Plasmodium protein, unknown function	1.52067
PF3D7_1427100	Q8ILJ3	PF3D7_1427100	4551.91	1.64469	0.030407	N/A	lipase, putative	1.51703
PF3D7_1201200	Q8I633	PF3D7_1201200	2610.22	1.69504	0.030478	N/A	Plasmodium exported protein (PHISTa-like), unknown function	1.51601
PF3D7_0632400	C6KTF6	PF3D7_0632400	5.18757	6.08112	0.030478	RIF	rifin	1.51601
PF3D7_1321100	C0H5C8	PF3D7_1321100	226.58	-2.4915	0.030507	N/A	protein kinase domain-containing protein, putative	1.5156
PF3D7_1038800	Q8IJ23	PF3D7_1038800	755.113	1.77279	0.030789	N/A	RESA-like protein with PHIST and DnaJ domains	1.5116
PF3D7_1406800	Q8IM26	PF3D7_1406800	388.265	-2.51954	0.030916	GAPM3	glideosome associated protein with multiple membrane spans 3	1.50982
PF3D7_0929400	C0H571	PF3D7_0929400	979.325	-2.6574	0.031458	RhopH2	high molecular weight rhoptry protein 2	1.50227
PF3D7_1101100	Q8IIY5	PF3D7_1101100	20.3603	3.05754	0.031993	RIF	rifin	1.49495
PF3D7_1247500	Q8I4V7	PF3D7_1247500	30.5476	-2.44546	0.032332	N/A	serine/threonine protein kinase, putative	1.49037
PF3D7_0405900	Q8I1W9	PF3D7_0405900	237.397	-2.86189	0.032749	ASP	apical sushi protein	1.4848
PF3D7_1449300	PF3D7_1449300	PF3D7_1449300	1454.97	1.54546	0.032914	BRF1	transcription factor IIIb subunit, putative	1.48262
PF3D7_1423300	Q8ILL9	PF3D7_1423300	105.298	-2.3199	0.032914	PP7	serine/threonine protein phosphatase 7	1.48262
PF3D7_0210600	O96188	PF3D7_0210600	69.729	-2.69359	0.032914	CERLI1	protein CERLI1	1.48262
PF3D7_1371600	PF3D7_1371600	PF3D7_1371600	106.239	-2.37404	0.033111	EBL1	erythrocyte binding like protein 1, pseudogene	1.48003
PF14_0013	Q8IM77	PF3D7_1401100	9861.32	1.80912	0.033153	A8IJP	HSPA8-interacting J protein	1.47948
PF3D7_1223100	Q7KQK0	PF3D7_1223100	847.069	-2.32102	0.033476	PKAr	cAMP-dependent protein kinase regulatory subunit	1.47527
PF3D7_1216500	Q8I5P2	PF3D7_1216500	153.204	-2.45427	0.033729	MDV1	male development gene 1	1.472
PF3D7_1115800	Q8IIK7	PF3D7_1115800	2337.51	1.65532	0.033861	N/A	conserved Plasmodium protein, unknown function	1.4703
PF3D7_0220700	Q8I653	PF3D7_0220700	334.742	1.75937	0.034066	N/A	Plasmodium exported protein (hyp9), unknown function	1.46768
PF3D7_0830600	Q8IBD2	PF3D7_0830600	5595.86	1.71554	0.034502	N/A	Plasmodium exported protein (PHISTc), unknown function	1.46216
PF3D7_1003400	Q8IK03	PF3D7_1003400	122.49	-2.18139	0.034502	N/A	conserved Plasmodium protein, unknown function	1.46216
PF3D7_0502400	Q8I476	PF3D7_0502400	2465.68	1.74782	0.034615	MSP8	merozoite surface protein 8	1.46074
PF3D7_0525800	Q8I3K7	PF3D7_0525800	261.888	-2.55231	0.034661	IMC1g	inner membrane complex protein 1g	1.46016
PF3D7_1413200	Q8ILW2	PF3D7_1413200	211.34	-2.21963	0.034968	N/A	conserved Plasmodium protein, unknown function	1.45633
PF3D7_1143100	Q8IHT5	PF3D7_1143100	132.788	-2.5351	0.034997	AP2-O	AP2 domain transcription factor AP2-O	1.45597
PF3D7_0301400	C0H467	PF3D7_0301400	85.9228	-2.08339	0.035128	N/A	Plasmodium exported protein, unknown function	1.45435
PF3D7_0802600	C0H4R1	PF3D7_0802600	206.885	-2.34782	0.03546	ACbeta	adenylyl cyclase beta	1.45026
PF3D7_1148800	Q8IHN6	PF3D7_1148800	514.756	1.67423	0.035651	N/A	Plasmodium exported protein (hyp11), unknown function	1.44793
PF3D7_1031400	PF3D7_1031400	PF3D7_1031400	77.1531	-2.50236	0.035651	OTU	OTU-like cysteine protease	1.44793
PF3D7_0424000	C0H495	PF3D7_0424000	1497.6	-1.82419	0.03706	N/A	Plasmodium exported protein (PHISTc), unknown function	1.43109
PF3D7_1001800	Q8IK18	PF3D7_1001800	497.027	1.65403	0.037338	N/A	Plasmodium exported protein (PHISTc), unknown function	1.42785
PF3D7_0935600	Q8I2G4	PF3D7_0935600	8864.96	1.7773	0.037383	GIG	gametocytogenesis-implicated protein	1.42733
PF3D7_0730800	PF3D7_0730800	PF3D7_0730800	9551.59	1.48341	0.037914	N/A	Plasmodium exported protein, unknown function	1.4212
PF3D7_0802800	Q8IAM8	PF3D7_0802800	153.225	-2.447	0.038078	CNA	serine/threonine protein phosphatase 2B catalytic subunit A	1.41933
PF3D7_0515700	Q8I3V1	PF3D7_0515700	566.799	-2.49737	0.038419	GAP40	glideosome-associated protein 40	1.41545
PF3D7_1001900	Q8IK17	PF3D7_1001900	1066.79	1.82939	0.038419	PfJ23	Plasmodium exported protein (hyp16), unknown function	1.41545
PF3D7_1022100	C6S3D3	PF3D7_1022100	471.537	1.70887	0.038419	N/A	methyltransferase, putative	1.41545
PF3D7_0532600	C0H4H1	PF3D7_0532600	311.137	-2.09766	0.038726	N/A	Plasmodium exported protein, unknown function	1.412
PF3D7_0105300	Q8I288	PF3D7_0105300	131.209	-2.54529	0.038726	CAP	cyclase-associated protein	1.412
PF3D7_1409400	Q8IM01	PF3D7_1409400	128.38	-2.20919	0.038726	N/A	conserved protein, unknown function	1.412
PF3D7_1100300	Q8IIZ3	PF3D7_1100300	174.408	6.23428	0.039889	RIF	rifin	1.39915
PF3D7_1035900	Q8IJ49	PF3D7_1035900	208.024	-2.56537	0.040012	MAAP	merozoites-associated armadillo repeats protein	1.39781
PF3D7_1036600	PF3D7_1036600	PF3D7_1036600	47.2383	-2.23354	0.040052	N/A	conserved protein, unknown function	1.39738
PF3D7_0407700	Q9U0K9	PF3D7_0407700	365.847	-2.10936	0.042208	N/A	TH1 domain-containing protein, putative	1.37461
PF3D7_0709900	Q8IBZ1	PF3D7_0709900	114.434	-2.09404	0.04296	N/A	hydrolase, putative	1.36694
PF3D7_0523800	Q8I3M7	PF3D7_0523800	475.135	1.61262	0.043522	FVRT1	food vacuole resident transporter 1	1.36129
PF3D7_1113000	Q8IIN2	PF3D7_1113000	49.895	-2.55958	0.043683	N/A	conserved Plasmodium protein, unknown function	1.35969
PF3D7_0726100	Q8IBJ5	PF3D7_0726100	5004.46	1.67705	0.044701	N/A	Plasmodium exported protein, unknown function	1.34968
PF3D7_0903600	PF3D7_0903600	PF3D7_0903600	365.648	-2.157	0.044973	N/A	protein hook, putative	1.34705
PF3D7_1001100	PF3D7_1001100	PF3D7_1001100	885.803	1.67337	0.044977	ACBP1	acyl-CoA binding protein, isoform 1, ACBP1	1.34701
PF3D7_1222700	Q8I5I8	PF3D7_1222700	320.135	-2.35005	0.04536	GAP45	glideosome-associated protein 45	1.34333
PF3D7_1462400	Q8IKL0	PF3D7_1462400	1049.48	1.44942	0.046598	N/A	conserved Plasmodium protein, unknown function	1.33163
PF3D7_1118700	Q8III1	PF3D7_1118700	226.551	-2.47764	0.04768	MLC-B	myosin light chain B	1.32166
PF3D7_0113700	Q8I2E1	PF3D7_0113700	1598.24	1.50608	0.047684	HSP40	heat shock protein 40, type II	1.32163
PF3D7_0831800	A0A143ZVM5	PF3D7_0831800	23703.4	4.84307	0.048536	HRP2	histidine-rich protein II	1.31394
PF3D7_0501400	Q8I486	PF3D7_0501400	16991.4	1.61781	0.048992	FIRA	interspersed repeat antigen	1.30987
PF3D7_1149600	Q8IHM7	PF3D7_1149600	2511.92	1.48113	0.048992	N/A	DnaJ protein, putative	1.30987
PF3D7_1003600	Q8IK01	PF3D7_1003600	594.18	-2.32963	0.049148	IMC1c	inner membrane complex protein 1c	1.30849
PF3D7_0907200	Q8I379	PF3D7_0907200	1479.04	1.59751	0.049148	N/A	GTPase-activating protein, putative	1.30849
PF3D7_1452000	Q8IKV6	PF3D7_1452000	130.626	-2.5542	0.049148	RON2	rhoptry neck protein 2	1.30849
PF3D7_1417400	PF3D7_1417400	PF3D7_1417400	116.525	-2.09245	0.049148	EPAC	rap guanine nucleotide exchange factor, putative, pseudogene	1.30849
PF3D7_1129600	Q8II67	PF3D7_1129600	41.4525	-2.35835	0.049148	N/A	phosphatidylinositol-4-phosphate 5-kinase, putative	1.30849
PF3D7_0908500	C0H527	PF3D7_0908500	74.5957	-2.43349	0.04931	N/A	conserved Plasmodium protein, unknown function	1.30706
pfsec23	Q8IB60	PF3D7_0822600	2023.94	1.37183	0.049335	SEC23	protein transport protein SEC23	1.30684
PF3D7_0501600	Q8I484	PF3D7_0501600	78.5364	-2.35873	0.049335	RAP2	rhoptry-associated protein 2	1.30684
PF3D7_0730400	Q8IBF5	PF3D7_0730400	71.9025	-2.11399	0.049335	IMP2	IMP1-like protein, putative	1.30684
PF3D7_0308300	O77324	PF3D7_0308300	24.0926	-2.91383	0.049335	PIC4	PhIL1-interacting candidate PIC4	1.30684
PF3D7_1469900	Q8IKD8	PF3D7_1469900	155.173	-1.9782	0.049969	MGET	protein MGET	1.3013
PFF1365c	C6KTB7	PF3D7_0628100	200.543	-2.35843	0.05004			1.30068
PF3D7_1014900	Q8IJP6	PF3D7_1014900	304.972	-2.36221	0.050527			1.29648
PF3D7_0212600	O96207	PF3D7_0212600	122.705	-2.05564	0.050527			1.29648
PF3D7_1007200	Q8IJX0	PF3D7_1007200	87.7574	-2.50277	0.050527			1.29648
PF3D7_0630800	C6KTE3	PF3D7_0630800	44.3219	-2.73579	0.050527			1.29648
PF3D7_0702300	Q8IC44	PF3D7_0702300	2037.53	1.53848	0.050834			1.29385
PF3D7_1440600	A0A144A207	PF3D7_1440600	34.3746	-2.19363	0.051068			1.29185
PF3D7_0936300	Q8I2F7	PF3D7_0936300	16611.9	1.69561	0.05232			1.28133
PF3D7_0406500	C0H491	PF3D7_0406500	21089.9	1.4392	0.05232			1.28133
PF3D7_0415100	Q8I1T7	PF3D7_0415100	203.912	1.37718	0.05232			1.28133
PF3D7_1019500	PF3D7_1019500	PF3D7_1019500	375.299	-2.10494	0.052411			1.28058
PF3D7_1472600	Q8IKB2	PF3D7_1472600	61.5841	-2.35515	0.053885			1.26853
PF3D7_1102800	Q8IIX3	PF3D7_1102800	37588.2	1.62136	0.053932			1.26815
PF3D7_0804300	Q8IAN9	PF3D7_0804300	497.31	1.59336	0.053932			1.26815
PF3D7_1247700	A0A144A0Z5	PF3D7_1247700	15.285	-3.56387	0.053932			1.26815
PF3D7_1213500	Q8I5S0	PF3D7_1213500	18.7638	-2.73859	0.053932			1.26815
PF3D7_0931300	Q8I2K2	PF3D7_0931300	119.676	1.98561	0.05431			1.26512
PF3D7_1029900	Q8IJA6	PF3D7_1029900	625.09	-2.49419	0.05496			1.25995
PF3D7_0617400	C6KT15	PF3D7_0617400	88.6797	1.63681	0.05496			1.25995
PF3D7_0528400	Q8I3I3	PF3D7_0528400	88.038	-2.74514	0.055109			1.25878
PF3D7_0810300	C0H4T6	PF3D7_0810300	476.316	-1.95949	0.055167			1.25832
PF3D7_0704500	C0H4K5	PF3D7_0704500	252.728	-2.38519	0.055167			1.25832
PF3D7_1119300	Q8IIH4	PF3D7_1119300	1309.52	1.27566	0.055167			1.25832
PF3D7_0109100	Q8I252	PF3D7_0109100	32.9171	-2.38428	0.055167			1.25832
PF3D7_1009700	Q8IJU8	PF3D7_1009700	129.148	-2.29987	0.055358			1.25682
PF3D7_0805500	C0H4R6	PF3D7_0805500	321.161	1.50882	0.055358			1.25682
PF3D7_0114300	PF3D7_0114300	PF3D7_0114300	14.6531	3.23395	0.055358			1.25682
PF3D7_1035500	Q8IJ54	PF3D7_1035500	981.534	-2.08947	0.055498			1.25572
PF3D7_0102800	Q8I2B2	PF3D7_0102800	65.9491	-1.88277	0.05597			1.25204
PF3D7_0930200	C0H576	PF3D7_0930200	55.6296	-2.55731	0.056584			1.24731
PF3D7_0930300	Q8I0U8	PF3D7_0930300	5762.43	-2.34431	0.05682			1.2455
PF3D7_1141800	Q8IHU7	PF3D7_1141800	43.2692	-2.46887	0.05682			1.2455
PF3D7_0102400	PF3D7_0102400	PF3D7_0102400	20.6682	-2.73026	0.05682			1.2455
PF3D7_0606500	C6KSR3	PF3D7_0606500	1650.2	1.36764	0.057723			1.23865
PF3D7_1463500	Q8IKK1	PF3D7_1463500	478.111	1.48416	0.057866			1.23758
PF3D7_1139100	Q8IHX4	PF3D7_1139100	3192.13	1.71216	0.05837			1.23381
PF3D7_0831600	A0A143ZVM1	PF3D7_0831600	61.2177	-2.18666	0.058524			1.23267
PFL2295w	Q8I4V5	PF3D7_1247900	777.361	1.5059	0.058955			1.22948
PF3D7_1351600	Q8IDI4	PF3D7_1351600	43.6238	-1.99316	0.059046			1.22881
PF3D7_0601300	PF3D7_0601300	PF3D7_0601300	11.741	3.56422	0.059046			1.22881
PF3D7_1436600	Q8I719	PF3D7_1436600	134.052	-2.17301	0.059722			1.22387
PF3D7_0621100	C6KT49	PF3D7_0621100	192.735	-1.90731	0.060073			1.22132
PF3D7_1324400	Q8IE73	PF3D7_1324400	500.741	1.54251	0.060073			1.22132
PF3D7_0207900	O96166	PF3D7_0207900	68.0962	-2.68028	0.060073			1.22132
PF3D7_1037500	Q8IJ32	PF3D7_1037500	28.4659	-2.41818	0.060073			1.22132
PF3D7_0831400	C0H4Z7	PF3D7_0831400	1539.79	-1.69166	0.060798			1.21611
PF3D7_1133700	Q8II28	PF3D7_1133700	28083	1.60811	0.061554			1.21074
PF3D7_1463900	Q8IKJ8	PF3D7_1463900	119.935	-2.26878	0.061554			1.21074
PF3D7_1301600	Q76NM5	PF3D7_1301600	97.123	5.60551	0.061554			1.21074
PF3D7_0115700	Q8I2C4	PF3D7_0115700	126.396	5.87184	0.06166			1.21
PF3D7_0821100	C0H4W5	PF3D7_0821100	2004.29	1.55799	0.063654			1.19617
PF3D7_1346500	A0A5K1K8P9	PF3D7_1346500	779.043	1.53343	0.06481			1.18836
PF3D7_0831700	K7NTP5	PF3D7_0831700	34856.2	1.57597	0.064988			1.18717
PF3D7_1319100	A0A5K1K970	PF3D7_1319100	276.245	1.61804	0.06547			1.18396
PF3D7_0219900	O96274	PF3D7_0219900	247.922	1.51656	0.06547			1.18396
PF3D7_1233200	PF3D7_1233200	PF3D7_1233200	198.993	-2.00676	0.066294			1.17853
PF3D7_1232500	A0A144A1B9	PF3D7_1232500	180.708	-2.04637	0.066294			1.17853
PF3D7_0405700	Q8I1X1	PF3D7_0405700	686.172	-1.56528	0.066401			1.17783
PF3D7_1017100	Q8IJM8	PF3D7_1017100	89.7429	-2.03081	0.066507			1.17713
PF3D7_1461400	Q8IKL8	PF3D7_1461400	59.4817	-2.23284	0.066507			1.17713
PF3D7_0626400	C6KTA0	PF3D7_0626400	85.847	-1.93865	0.067105			1.17325
PF3D7_1239900	Q8I524	PF3D7_1239900	690.982	1.26484	0.06717			1.17282
PF3D7_0624300	C6KT79	PF3D7_0624300	23.3178	-2.31782	0.067912			1.16805
PF3D7_1001700	Q8IK19	PF3D7_1001700	2320.65	1.49583	0.068052			1.16716
PF3D7_1020200	Q8IJK0	PF3D7_1020200	30.3101	-2.7184	0.068052			1.16716
PF3D7_1014000	A0A143ZXB3	PF3D7_1014000	28.0189	-2.45607	0.068052			1.16716
PF3D7_1372400	C0H5N0	PF3D7_1372400	17.5101	3.66118	0.068052			1.16716
PF3D7_1426300	C6S3I1	PF3D7_1426300	62.974	-2.0561	0.06808			1.16698
PF3D7_0508200	C0H4D2	PF3D7_0508200	75.8705	-2.06537	0.068276			1.16573
PF3D7_1210400	Q8I5U5	PF3D7_1210400	476.734	1.27993	0.069265			1.15949
PF3D7_0624800	C6KT84	PF3D7_0624800	6.73189	-5.01279	0.070217			1.15356
PF3D7_1148900	Q8IHN5	PF3D7_1148900	1011.93	1.54879	0.07038			1.15255
PF3D7_1018200	C6S3C9	PF3D7_1018200	233.938	-2.19947	0.07038			1.15255
PF14_0159	Q8ILT5	PF3D7_1416100	541.797	1.4124	0.07038			1.15255
PF3D7_1429500	Q8ILG9	PF3D7_1429500	238.856	1.61904	0.07038			1.15255
PF3D7_1239300	Q8I530	PF3D7_1239300	153.129	1.57919	0.07038			1.15255
PF3D7_1253500	Q8I4Q2	PF3D7_1253500	4.95668	-5.56787	0.07038			1.15255
PF3D7_1240800	PF3D7_1240800	PF3D7_1240800	5.05584	6.01868	0.07038			1.15255
PF3D7_1301500	Q8IEJ1	PF3D7_1301500	9.44688	3.84098	0.070816			1.14987
PF3D7_1026400	Q8IJD7	PF3D7_1026400	34.7258	-2.41952	0.071263			1.14714
PFL2215w	Q8I4X0	PF3D7_1246200	3042.92	-1.75456	0.071445			1.14603
PF3D7_0109000	Q8I253	PF3D7_0109000	167.561	-2.25839	0.071509			1.14564
PF3D7_1442900	Q8IL42	PF3D7_1442900	4456.05	1.39744	0.072475			1.13981
PF3D7_0713200	A0A143ZWP5	PF3D7_0713200	1521.86	4.70584	0.073571			1.13329
PF14_0444	Q8IL06	PF3D7_1446700	155.974	-1.74677	0.073571			1.13329
PF3D7_0623900	C6KT75	PF3D7_0623900	170.004	-1.45674	0.073571			1.13329
PF3D7_1315300	Q8IEG2	PF3D7_1315300	13.5172	-3.62116	0.074644			1.12701
PF3D7_0828600	Q8IBB7	PF3D7_0828600	50.4178	-2.2857	0.07487			1.12569
PF3D7_0109700	Q8I247	PF3D7_0109700	1185.47	1.33617	0.0751			1.12436
PF3D7_0220100	O96276	PF3D7_0220100	1096.54	1.41247	0.076705			1.11518
PF3D7_0408000	Q9U0K6	PF3D7_0408000	85.6884	-2.32373	0.076705			1.11518
PF3D7_0516500	C0H4E1	PF3D7_0516500	53.1354	-1.81217	0.076705			1.11518
PF3D7_1230300	Q8I5B7	PF3D7_1230300	4.27686	-5.35092	0.078545			1.10488
PF3D7_1343700	Q8IDQ2	PF3D7_1343700	2430.85	1.384	0.079824			1.09787
PF3D7_1036000	Q8IJ48	PF3D7_1036000	109.387	-2.42731	0.079824			1.09787
PF3D7_1337700	Q8IDV6	PF3D7_1337700	59.6394	-2.64321	0.079824			1.09787
PF3D7_0321400	C0H482	PF3D7_0321400	39.1223	-2.47115	0.079824			1.09787
PF3D7_0613300	C6KSX6	PF3D7_0613300	117.958	-2.16361	0.08061			1.09361
PF3D7_1230900	A0A144A2N6	PF3D7_1230900	2905.27	1.38817	0.081456			1.08908
PF3D7_0610400	C6KSV0	PF3D7_0610400	581.854	-1.76822	0.081456			1.08908
PF3D7_0301500	O97331	PF3D7_0301500	294.709	1.40199	0.081862			1.08692
PF3D7_1361800	A0A5K1K8J3	PF3D7_1361800	799.877	-2.23629	0.081879			1.08683
PF3D7_1114200	Q8IIL9	PF3D7_1114200	849.497	1.42789	0.081879			1.08683
PF3D7_1127000	Q8II93	PF3D7_1127000	378.722	1.63388	0.081879			1.08683
PF3D7_1409300	Q8IM03	PF3D7_1409300	143.08	-1.8	0.081879			1.08683
PF3D7_0902000	C0H513	PF3D7_0902000	244.087	1.41432	0.081879			1.08683
PF3D7_1230100	Q8I5B9	PF3D7_1230100	8.6645	-4.53963	0.081879			1.08683
PF3D7_0100100	Q9NFB6	PF3D7_0100100	4.33188	-5.37098	0.082232			1.08496
PF3D7_1477900	PF3D7_1477900	PF3D7_1477900	10.0119	3.36979	0.082753			1.08222
PF14_0127	Q8ILW6	PF3D7_1412800	2041.75	1.3461	0.08306			1.08061
PF3D7_1001200	Q8IK24	PF3D7_1001200	382.983	-1.5422	0.083132			1.08023
PF3D7_0302500	O77310	PF3D7_0302500	1157.09	-2.08398	0.083488			1.07838
PF3D7_0918000	Q8I2X3	PF3D7_0918000	889.521	-1.8835	0.083488			1.07838
PF3D7_1334700	A0A5K1K987	PF3D7_1334700	1283.94	1.40163	0.083488			1.07838
PF3D7_1464200	Q8IKJ5	PF3D7_1464200	276.231	1.46955	0.083488			1.07838
PF3D7_1140400	Q8IHW1	PF3D7_1140400	50.5781	-2.36172	0.083488			1.07838
PF3D7_1446400	Q8IL09	PF3D7_1446400	87.1471	-1.68857	0.083488			1.07838
PF3D7_0903500	Q8I3B3	PF3D7_0903500	2261.77	1.30619	0.083785			1.07683
PF3D7_0216000	O96239	PF3D7_0216000	103.221	-2.1473	0.083785			1.07683
PF3D7_0100400	Q9NFB3	PF3D7_0100400	4.14836	-5.30671	0.083785			1.07683
PF3D7_1310700	Q8IEK9	PF3D7_1310700	647.001	-2.22025	0.084457			1.07336
PF3D7_1358700	Q8IDB8	PF3D7_1358700	697.771	1.31588	0.084527			1.073
PF3D7_1133400	Q7KQK5	PF3D7_1133400	654.047	-2.29496	0.084677			1.07223
PF3D7_0902100	Q8I3C7	PF3D7_0902100	39.8807	-2.12233	0.084717			1.07203
PF3D7_0525000	Q8I3L5	PF3D7_0525000	119.358	-1.50287	0.085039			1.07038
PF3D7_0625000	PF3D7_0625000	PF3D7_0625000	18.3435	-2.8804	0.085039			1.07038
PF3D7_0731500	Q8IBE8	PF3D7_0731500	4332.39	-2.13105	0.085113			1.07
PF3D7_1136700	PF3D7_1136700	PF3D7_1136700	83.7433	-2.02384	0.085238			1.06937
PF3D7_1428500	Q8ILH9	PF3D7_1428500	187.89	1.36216	0.085443			1.06832
PF3D7_1100200	Q8IIZ4	PF3D7_1100200	2243.05	6.18173	0.086102			1.06499
PF3D7_1410800	Q8ILY7	PF3D7_1410800	49.656	-2.29102	0.087537			1.05781
PF3D7_0813100	Q8IAW6	PF3D7_0813100	64.9899	-2.1227	0.088103			1.05501
PF3D7_0803200	Q8IAN2	PF3D7_0803200	231.819	-1.91037	0.088161			1.05472
PF3D7_0205100	C6S3B0	PF3D7_0205100	140.247	-1.87834	0.088161			1.05472
PF3D7_0105400	PF3D7_0105400	PF3D7_0105400	37.6179	-2.64117	0.088161			1.05472
PF3D7_0103800	Q8I2A2	PF3D7_0103800	65.9045	-1.72797	0.088161			1.05472
PF3D7_1242300	Q8I506	PF3D7_1242300	33.6676	-2.15924	0.088161			1.05472
PF3D7_0919900	Q8I2V4	PF3D7_0919900	487.703	-1.98131	0.088187			1.0546
PF3D7_0818800	Q8IB23	PF3D7_0818800	538.809	1.49127	0.088313			1.05398
PF3D7_0407800	Q9U0K8	PF3D7_0407800	544.836	-2.07898	0.088357			1.05376
PF3D7_1005100	Q8IJY7	PF3D7_1005100	1022.28	1.3318	0.088464			1.05323
PF3D7_1216300	Q8I5P4	PF3D7_1216300	847.927	1.36684	0.088525			1.05293
PF3D7_1303700	Q8IES8	PF3D7_1303700	74.0551	-1.97029	0.088525			1.05293
PF3D7_0400500	Q8I217	PF3D7_0400500	9.03857	3.76126	0.088525			1.05293
PF3D7_0713300	PF3D7_0713300	PF3D7_0713300	3283.91	4.56452	0.08884			1.05139
PF3D7_1021100	Q8IJJ2	PF3D7_1021100	373.365	1.25265	0.08884			1.05139
PF3D7_0608600	C6KST4	PF3D7_0608600	96.1266	-1.55697	0.08884			1.05139
PF3D7_1118600	Q8III2	PF3D7_1118600	1524.7	1.26825	0.088895			1.05112
PF3D7_0911100	Q8I341	PF3D7_0911100	463.821	-2.08125	0.089372			1.0488
PF3D7_1473900	Q8IK99	PF3D7_1473900	912.578	1.46152	0.089692			1.04725
PF3D7_0935900	Q8I2G1	PF3D7_0935900	67154	1.47849	0.089801			1.04672
PF3D7_1246400	Q8I4W8	PF3D7_1246400	371.4	-1.95023	0.089801			1.04672
PF3D7_0909100	C0H528	PF3D7_0909100	29.3943	-2.54428	0.089801			1.04672
PF3D7_0501100	PF3D7_0501100	PF3D7_0501100	3016.42	1.35348	0.09023			1.04465
PF3D7_0418000	C0H4B3	PF3D7_0418000	145.524	-1.53505	0.09023			1.04465
PF3D7_0731100	Q8IBF1	PF3D7_0731100	10375.4	1.35336	0.090573			1.043
PF3D7_1149000	Q8IHN4	PF3D7_1149000	3611.67	-1.37984	0.090573			1.043
PF3D7_1459000	Q8IKP1	PF3D7_1459000	4928.68	1.26866	0.090573			1.043
PF3D7_0716200	Q8IBT8	PF3D7_0716200	2016.06	1.38164	0.090573			1.043
PF3D7_1119900	Q8IIG8	PF3D7_1119900	1502.44	1.32276	0.090573			1.043
PF3D7_1218500	Q8I5M3	PF3D7_1218500	1360.25	1.29511	0.090573			1.043
PF3D7_1308000	C0H5A5	PF3D7_1308000	141.726	-2.13252	0.090573			1.043
PF3D7_1469800	Q8IKD9	PF3D7_1469800	238.907	-1.57965	0.090573			1.043
PF3D7_1368700	Q8ID23	PF3D7_1368700	206.852	-1.25907	0.090573			1.043
PF3D7_1401900	Q8IM70	PF3D7_1401900	57.1358	-2.08941	0.090573			1.043
PF3D7_1200300	Q8I641	PF3D7_1200300	3.74519	5.58324	0.090573			1.043
PF3D7_0613900	C6KSY1	PF3D7_0613900	454.944	-1.99175	0.090658			1.04259
PF3D7_1035600	Q8IJ53	PF3D7_1035600	54.2415	-2.28325	0.091294			1.03956
PF3D7_1453900	Q8IKT9	PF3D7_1453900	1752.13	1.34431	0.091949			1.03645
PF3D7_1430300	Q8ILG1	PF3D7_1430300	838.81	1.42137	0.091949			1.03645
PF3D7_1312800	Q8IEJ4	PF3D7_1312800	247.103	-1.91829	0.091949			1.03645
PF3D7_1017500	Q8IJM4	PF3D7_1017500	269.582	-1.76629	0.091949			1.03645
PF3D7_1431900	Q8ILE6	PF3D7_1431900	43.3139	-1.98291	0.091949			1.03645
PF3D7_0401700	PF3D7_0401700	PF3D7_0401700	364.867	-1.6209	0.092115			1.03567
PF3D7_1475800	A0A144A7A0	PF3D7_1475800	20.0254	-2.41089	0.09236			1.03452
PF3D7_0113000	Q9U0N1	PF3D7_0113000	32889.2	1.41042	0.09318			1.03068
PF3D7_1323800	A0A5K1K8G8	PF3D7_1323800	449.555	1.24248	0.09318			1.03068
PF3D7_0318500	O77372	PF3D7_0318500	97.0242	-1.96128	0.093613			1.02866
PF3D7_0609700	C6KSU4	PF3D7_0609700	5372.59	1.36601	0.093858			1.02753
PF3D7_1001400	Q8IK22	PF3D7_1001400	4003.36	1.38096	0.093858			1.02753
PF3D7_1372300	A0A143ZZR8	PF3D7_1372300	1151.23	5.60493	0.093858			1.02753
PF3D7_0209700	O96182	PF3D7_0209700	2021.6	1.29439	0.093858			1.02753
PF3D7_0215300	O96232	PF3D7_0215300	849.746	1.38207	0.093858			1.02753
PF3D7_1038400	Q8I6U6	PF3D7_1038400	78.864	-2.08159	0.093858			1.02753
PF3D7_1445200	Q8IL21	PF3D7_1445200	3050.66	1.32966	0.094263			1.02566
PF3D7_1039100	PF3D7_1039100	PF3D7_1039100	10.2865	-3.15939	0.094263			1.02566
PF3D7_1425300	A0A144A3H3	PF3D7_1425300	201.962	-1.67749	0.094279			1.02559
PF3D7_1128900	A0A143ZYW1	PF3D7_1128900	145.426	-2.22215	0.094286			1.02555
PF3D7_1013900	Q8IJQ6	PF3D7_1013900	768.852	1.26504	0.094286			1.02555
PF3D7_0314000	C0H473	PF3D7_0314000	135.051	-1.62442	0.094286			1.02555
PF3D7_0103700	Q8I2A3	PF3D7_0103700	163.433	-1.342	0.094654			1.02386
PF3D7_0809700	Q8IAT2	PF3D7_0809700	12.8901	-3.19739	0.094654			1.02386
PF3D7_0311500	Q9NFE5	PF3D7_0311500	368.654	1.22679	0.094769			1.02333
PFE0165w	Q8I467	PF3D7_0503400	890.597	-1.80857	0.094852			1.02295
PF3D7_0103200	Q8I2A8	PF3D7_0103200	711.372	-1.16694	0.094852			1.02295
PF3D7_0203700	A0A143ZWE8	PF3D7_0203700	2772.37	1.26437	0.096203			1.01681
PF3D7_0323800	O97306	PF3D7_0323800	1677.05	1.32096	0.096203			1.01681
PF3D7_1208800	Q8I5W0	PF3D7_1208800	1067.85	1.35189	0.096203			1.01681
PF3D7_0828800	Q8IBB9	PF3D7_0828800	245.414	-1.93222	0.096203			1.01681
PF3D7_1356800	Q8IDD4	PF3D7_1356800	173.306	-1.74167	0.096203			1.01681
PF3D7_0820300	Q8IB38	PF3D7_0820300	1381.16	1.27765	0.096342			1.01618
PF3D7_1322500	Q8IE90	PF3D7_1322500	188.944	-2.05407	0.096353			1.01613
PF3D7_0308100	O77322	PF3D7_0308100	171.727	-2.23989	0.096353			1.01613
PF3D7_0530900	Q8I3F9	PF3D7_0530900	88.043	-2.44951	0.096353			1.01613
PF3D7_1252100	Q8I4R5	PF3D7_1252100	153.415	-2.14018	0.096475			1.01559
PF3D7_0423300	Q8IFN3	PF3D7_0423300	86.2957	-2.35811	0.096605			1.015
PF3D7_0320800	O97285	PF3D7_0320800	126.437	-1.59077	0.096605			1.015
PF3D7_1023400	Q8IJH1	PF3D7_1023400	111.228	-1.6839	0.096605			1.015
PF3D7_0806200	C0H4S1	PF3D7_0806200	36.4707	-2.55897	0.096744			1.01438
PF3D7_0111000	Q8I235	PF3D7_0111000	180.334	-1.81373	0.096756			1.01432
PF3D7_1246300	Q8I4W9	PF3D7_1246300	1582.86	1.20525	0.096947			1.01347
PF3D7_0812500	Q8IAW1	PF3D7_0812500	6403.06	1.31492	0.097129			1.01265
PF3D7_0506900	Q8I433	PF3D7_0506900	300.371	-1.96001	0.097129			1.01265
PF3D7_1014100	Q8IJQ4	PF3D7_1014100	54.1371	-2.15802	0.097129			1.01265
PF3D7_1471500	Q8IKC4	PF3D7_1471500	39.4051	-1.99225	0.097129			1.01265
PF3D7_1351700	A0A5K1K988	PF3D7_1351700	541.562	-1.9252	0.09749			1.01104
PF3D7_0808200	Q8IAS0	PF3D7_0808200	376.909	-2.0602	0.09749			1.01104
PF3D7_0414900	C0H4A5	PF3D7_0414900	223.201	-2.11622	0.09749			1.01104
PF3D7_1320700	Q8IEA7	PF3D7_1320700	182.76	-2.00929	0.09749			1.01104
PF3D7_1361500	PF3D7_1361500	PF3D7_1361500	93.1095	-2.3109	0.09749			1.01104
PF3D7_0314900	O97264	PF3D7_0314900	59.0014	-1.78466	0.09749			1.01104
PF3D7_1027100	Q8IJD2	PF3D7_1027100	2487.65	1.30423	0.097561			1.01072
PF3D7_0820500	Q8IB40	PF3D7_0820500	1050.37	1.3243	0.097561			1.01072
PF3D7_1104900	Q8IIV3	PF3D7_1104900	244.175	-1.73772	0.097561			1.01072
PFL2415w	Q8I4T1	PF3D7_1250300	304.227	-1.3629	0.097561			1.01072
PF3D7_1359900	A0A5K1K916	PF3D7_1359900	721.197	1.22508	0.097561			1.01072
PF3D7_1461200	A0A144A2N8	PF3D7_1461200	295.914	1.45079	0.097561			1.01072
PF3D7_0205800	C6S3B1	PF3D7_0205800	136.509	-1.39817	0.097561			1.01072
PF3D7_1435200	Q8ILB2	PF3D7_1435200	36.8309	-2.68404	0.097561			1.01072
PF3D7_0109400	Q8I250	PF3D7_0109400	232.638	-1.31579	0.098025			1.00866
PF3D7_0935400	Q8I2G6	PF3D7_0935400	155.722	-1.97629	0.098175			1.008
PF3D7_1018300	C6S3D0	PF3D7_1018300	1057.8	1.25164	0.098321			1.00735
PF3D7_0209100	O96176	PF3D7_0209100	622.238	1.17327	0.098321			1.00735
PF3D7_1235200	Q8I570	PF3D7_1235200	85.4687	-2.32206	0.098321			1.00735
PF3D7_1477700	Q8IK58	PF3D7_1477700	93.9095	1.66958	0.098321			1.00735
PF3D7_0204000	O96140	PF3D7_0204000	32.5761	-2.00594	0.098524			1.00646
PF3D7_0802100	Q8IAM1	PF3D7_0802100	202.009	-1.91122	0.098555			1.00632
PF3D7_1036400	A0A143ZZD7	PF3D7_1036400	8.94102	-4.59292	0.098636			1.00596
PF3D7_0806300	C0H4S2	PF3D7_0806300	113.542	-2.15573	0.098676			1.00579
PF3D7_1004600	Q8IJZ1	PF3D7_1004600	157.29	-1.78199	0.098927			1.00469
PF3D7_MIT01300	PF3D7_MIT01300	PF3D7_MIT01300	53.839	-1.82791	0.098927			1.00469
PF3D7_1444200	Q8IL29	PF3D7_1444200	22.7646	-2.62396	0.098927			1.00469
PF3D7_1209300	Q7KQK4	PF3D7_1209300	685.549	-1.28163	0.099267			1.0032
PF3D7_1403400	A0A144A137	PF3D7_1403400	85.763	-1.898	0.099267			1.0032
PF3D7_0403600	C0H488	PF3D7_0403600	56.7891	-1.87792	0.099267			1.0032
PF3D7_1340800	Q8IDS8	PF3D7_1340800	62.6958	-1.77154	0.099913			1.00038
PF3D7_0102300	Q8I2B6	PF3D7_0102300	460.406	-1.75278	0.100002			0.999991
PF3D7_0826900	C0H4Y1	PF3D7_0826900	322.577	-1.46026	0.100002			0.999991
PF3D7_0501500	Q8I485	PF3D7_0501500	81.9683	-2.35038	0.100002			0.999991
PF3D7_0324700	PF3D7_0324700	PF3D7_0324700	9.46448	3.4482	0.100002			0.999991
PF3D7_0900700	Q8I3D9	PF3D7_0900700	6.03272	4.2507	0.100002			0.999991
PF3D7_1135100	Q8II13	PF3D7_1135100	816.625	1.38459	0.100091			0.999605
PF3D7_0727900	Q8IBH8	PF3D7_0727900	331.096	1.50944	0.100091			0.999605
PF3D7_0631200	PF3D7_0631200	PF3D7_0631200	13.5246	2.41054	0.100091			0.999605
PF3D7_1035400	Q8IJ55	PF3D7_1035400	802.358	-1.89283	0.10092			0.996023
PF3D7_0413500	Q8I1V2	PF3D7_0413500	148.109	-1.69818	0.101732			0.992542
PF3D7_0710100	Q8IBY9	PF3D7_0710100	438.92	1.14112	0.101732			0.992542
PF3D7_0723800	Q8IBL5	PF3D7_0723800	316.779	-1.7684	0.102221			0.99046
PF3D7_1451300	Q8IKW3	PF3D7_1451300	235.506	-1.54816	0.102221			0.99046
PF3D7_0723300	Q8IBM0	PF3D7_0723300	74.5014	-1.80919	0.102221			0.99046
PF3D7_1458700	Q8IKP4	PF3D7_1458700	55.8473	-1.9853	0.102221			0.99046
PF3D7_1253000	Q8I4Q6	PF3D7_1253000	7886.56	1.3664	0.102724			0.988328
PF3D7_1426800	Q8ILJ6	PF3D7_1426800	1669.41	1.2121	0.102724			0.988328
PF3D7_1033800	Q8IJ71	PF3D7_1033800	10.6392	-3.13548	0.102736			0.988277
PF3D7_0922600	C0H551	PF3D7_0922600	1708.04	1.39783	0.10285			0.987796
PF3D7_1458600	Q8IKP5	PF3D7_1458600	898.289	1.29594	0.103018			0.987087
PF3D7_1459400	Q8IKN7	PF3D7_1459400	596.259	1.39276	0.103018			0.987087
PF3D7_1459200	Q8IKN9	PF3D7_1459200	788.525	1.12973	0.103018			0.987087
PF3D7_1229800	A0A144A488	PF3D7_1229800	119.197	-1.94039	0.103018			0.987087
PF3D7_0105700	Q8I284	PF3D7_0105700	178.829	-1.4474	0.103018			0.987087
PF3D7_1206000	Q8I5Y5	PF3D7_1206000	134.257	-1.72784	0.103018			0.987087
PF3D7_1455300	Q8IKS5	PF3D7_1455300	97.8731	-1.7206	0.103018			0.987087
PF3D7_0806600	C0H4S3	PF3D7_0806600	292.898	1.21316	0.103018			0.987087
PF3D7_1432200	Q8ILE1	PF3D7_1432200	77.3809	-2.10705	0.103291			0.985938
PF3D7_1036700	A0A143ZZR4	PF3D7_1036700	106.296	-1.55114	0.103291			0.985938
PF3D7_1011000	Q8IJT5	PF3D7_1011000	52.6883	-1.62498	0.103317			0.985828
PF3D7_0517300	Q8I3T5	PF3D7_0517300	5903.63	1.18298	0.103493			0.985089
PF3D7_1221900	Q8I5J4	PF3D7_1221900	3723.89	1.34822	0.103493			0.985089
PF3D7_0214600	O96226	PF3D7_0214600	559.658	-2.01003	0.103493			0.985089
PF3D7_1431200	Q8ILF3	PF3D7_1431200	2160.06	1.22934	0.103493			0.985089
PF3D7_1132800	Q8II36	PF3D7_1132800	376.004	-1.57553	0.103493			0.985089
PF3D7_0918700	Q8I2W6	PF3D7_0918700	652.266	1.54436	0.103493			0.985089
PF3D7_1465400	Q8IKI4	PF3D7_1465400	1003.8	1.28902	0.103493			0.985089
PF3D7_0913800	Q8I314	PF3D7_0913800	101.652	-2.15027	0.103493			0.985089
PF3D7_1113600	Q8IIM6	PF3D7_1113600	650.335	1.20949	0.103493			0.985089
PF3D7_0605900	C6KSQ7	PF3D7_0605900	227.649	1.43405	0.103493			0.985089
PF3D7_0920500	Q8I2U8	PF3D7_0920500	68.121	-1.95828	0.103493			0.985089
PF3D7_0818100	Q8IB16	PF3D7_0818100	144.641	-2.01322	0.103694			0.984246
PF3D7_1449200	C6S3J1	PF3D7_1449200	387.494	-3.54262	0.103879			0.983472
PF3D7_1100100	Q8IIZ5	PF3D7_1100100	219.752	4.66787	0.103879			0.983472
PF3D7_0929000	Q8I2M0	PF3D7_0929000	527.753	1.23357	0.103879			0.983472
PF3D7_1232700	A0A144A4C1	PF3D7_1232700	83.0314	-1.79082	0.103879			0.983472
PF3D7_0707500	Q8IC14	PF3D7_0707500	170.643	1.24888	0.103879			0.983472
PF3D7_1317900	Q8IED7	PF3D7_1317900	1005.48	1.27301	0.104793			0.979668
PF3D7_1420000	Q8ILQ0	PF3D7_1420000	1504.47	1.18665	0.104822			0.979548
PF3D7_1007300	Q8IJW9	PF3D7_1007300	16.2501	-2.98282	0.105222			0.977893
PF3D7_1036500	Q8IJ43	PF3D7_1036500	204.003	-1.8415	0.107393			0.969024
PF3D7_0305300	O97238	PF3D7_0305300	2377.86	1.16401	0.1078			0.967381
PF3D7_0214200	O96222	PF3D7_0214200	242.085	-1.40094	0.1078			0.967381
PF3D7_1355300	Q8IDE8	PF3D7_1355300	269.616	1.45234	0.1078			0.967381
PF3D7_1461600	Q8IKL7	PF3D7_1461600	3445.04	1.21553	0.108122			0.966086
PF3D7_1421100	Q8ILN9	PF3D7_1421100	325.926	1.42843	0.108513			0.964518
PF3D7_0310000	Q9NLA7	PF3D7_0310000	56.1504	-1.80266	0.108513			0.964518
PF3D7_0407900	Q9U0K7	PF3D7_0407900	350.92	-1.42094	0.108552			0.964362
PF3D7_1143700	Q8IHS8	PF3D7_1143700	29.8424	-2.03454	0.10893			0.962852
PF3D7_1016600	C6S3C7	PF3D7_1016600	119.578	1.62836	0.109816			0.959334
PF3D7_1419900	Q8ILQ1	PF3D7_1419900	225.486	1.24911	0.110155			0.957996
PF3D7_1477000	PF3D7_1477000	PF3D7_1477000	32.7034	2.01546	0.110155			0.957996
PF3D7_0316000	O77394	PF3D7_0316000	36.1068	-1.92321	0.111			0.954677
PF3D7_1236400	Q8I559	PF3D7_1236400	530.493	1.32252	0.111037			0.954532
PF3D7_0424500	Q8IFM1	PF3D7_0424500	1324.44	1.29712	0.111355			0.95329
PF3D7_1013100	Q8IJR4	PF3D7_1013100	1693.8	1.22247	0.111355			0.95329
PF3D7_1302600	Q8I701	PF3D7_1302600	613.054	1.243	0.111355			0.95329
PF3D7_1030000	Q8IJA5	PF3D7_1030000	686.034	1.12341	0.111355			0.95329
PF3D7_1127600	Q8II87	PF3D7_1127600	160.206	-1.25275	0.111704			0.951931
PF3D7_0622900	C6KT65	PF3D7_0622900	3427.12	1.24743	0.111918			0.9511
PF3D7_1036800	Q8IJ40	PF3D7_1036800	94.4801	-1.59154	0.111918			0.9511
PF3D7_1204900	Q8I5Z6	PF3D7_1204900	53.4919	-1.85596	0.111918			0.9511
PF3D7_1327300	A0A5K1K8E0	PF3D7_1327300	1516.23	-1.30538	0.112358			0.949396
PF3D7_1121100	Q8IIF6	PF3D7_1121100	1755.6	1.14372	0.112358			0.949396
PF3D7_1350300	A0A5K1K8F9	PF3D7_1350300	936.69	1.23838	0.112358			0.949396
PF3D7_0935700	Q8I2G3	PF3D7_0935700	682.002	1.25159	0.112358			0.949396
PF3D7_0935390	PF3D7_0935390	PF3D7_0935390	168.658	-1.91032	0.112358			0.949396
PF3D7_1200900	Q8I636	PF3D7_1200900	525.049	1.29483	0.112358			0.949396
PF3D7_0407300	Q9U0L3	PF3D7_0407300	408.368	1.25324	0.112358			0.949396
PF3D7_0920700	Q8I2U6	PF3D7_0920700	98.5774	-1.65771	0.112358			0.949396
PF3D7_0532800	PF3D7_0532800	PF3D7_0532800	13.8693	-2.51524	0.112358			0.949396
RPL18	Q6LFD5	PF3D7_0613400	157.156	-1.67059	0.112458			0.94901
PF3D7_0309300	O77329	PF3D7_0309300	708.826	1.20575	0.112471			0.948959
PF3D7_0619200	C6KT32	PF3D7_0619200	2817.19	1.13416	0.112881			0.947379
PF3D7_1470000	C6S3K2	PF3D7_1470000	33.7488	-1.81922	0.114083			0.942779
PF3D7_0424400	Q8IFM2	PF3D7_0424400	91.0542	1.47239	0.114688			0.940482
PF3D7_0216700	PF3D7_0216700	PF3D7_0216700	1353.6	-1.49902	0.115351			0.937979
PF12	C6KSX0	PF3D7_0612700	127.792	-1.46159	0.115351			0.937979
PF3D7_1451200	Q8IKW4	PF3D7_1451200	8321.21	1.15874	0.115544			0.937253
PF3D7_1136600	Q8IHZ8	PF3D7_1136600	5016.46	1.23794	0.115544			0.937253
PF3D7_0902500	Q8I3C3	PF3D7_0902500	1982.13	1.40453	0.115544			0.937253
PF3D7_0401800	Q8I207	PF3D7_0401800	396.745	-1.43364	0.115544			0.937253
PF3D7_0522400	C0H4F8	PF3D7_0522400	279.733	-1.46128	0.115544			0.937253
PF3D7_0714200	Q8IBV5	PF3D7_0714200	1021.75	1.16735	0.115544			0.937253
PF3D7_0404700	Q8I1Y2	PF3D7_0404700	161.533	-1.76115	0.115544			0.937253
PF3D7_0731400	PF3D7_0731400	PF3D7_0731400	300.384	-1.28061	0.115544			0.937253
PF3D7_1436200	Q8ILA2	PF3D7_1436200	140.371	-1.64989	0.115544			0.937253
PF3D7_1224500	Q8I5H2	PF3D7_1224500	135.496	-1.43836	0.115544			0.937253
PF3D7_1122600	Q8IIE0	PF3D7_1122600	28.4517	-2.02203	0.115544			0.937253
PF3D7_0919200	Q8I2W1	PF3D7_0919200	64.4937	-1.9448	0.115817			0.936228
PF3D7_1433500	Q8ILC8	PF3D7_1433500	5138.32	1.30298	0.115977			0.935628
PF3D7_1138700	Q8IHX8	PF3D7_1138700	1327.07	1.11254	0.115977			0.935628
PF3D7_1338900	A0A5K1K8V9	PF3D7_1338900	198.002	-1.55519	0.115977			0.935628
PF3D7_0216900	O96248	PF3D7_0216900	54.4996	-1.55148	0.116632			0.933182
Pfn	Q8I2J4	PF3D7_0932200	705.117	-1.31415	0.116651			0.933112
PF3D7_1201500	Q8I630	PF3D7_1201500	997.385	1.24489	0.116651			0.933112
PF3D7_1029200	Q8IJB3	PF3D7_1029200	388.326	1.42364	0.116651			0.933112
PF3D7_0923000	Q8I2S6	PF3D7_0923000	387.253	1.25395	0.116651			0.933112
PF3D7_1373500	Q8ID12	PF3D7_1373500	142.987	5.3398	0.116782			0.932624
PF3D7_1023300	Q8IJH2	PF3D7_1023300	56.4714	-1.55427	0.116782			0.932624
PF3D7_0220000	O96275	PF3D7_0220000	11881.7	1.19459	0.117063			0.93158
PF3D7_1307900	Q8IEN6	PF3D7_1307900	36.5449	-2.42008	0.117063			0.93158
PF3D7_1025400	Q8IJF0	PF3D7_1025400	99.8653	-2.05066	0.11712			0.931369
PF3D7_1021800	A0A143ZXM2	PF3D7_1021800	1050.8	-1.7665	0.117142			0.931287
PF3D7_1236900	Q8I554	PF3D7_1236900	89.7341	-1.59683	0.117142			0.931287
PF3D7_0525700	Q8I3K8	PF3D7_0525700	64.5793	-1.73329	0.117142			0.931287
PF3D7_1401200	Q8IM76	PF3D7_1401200	934.524	-1.27342	0.117943			0.928328
PF3D7_0816000	Q8IAZ7	PF3D7_0816000	1201.63	1.1996	0.117943			0.928328
PF3D7_0104200	Q8I298	PF3D7_0104200	228.568	-1.1135	0.117943			0.928328
PF3D7_1353100	Q8IDG9	PF3D7_1353100	3371.27	1.44323	0.118029			0.928011
PF3D7_0819800	Q8IB33	PF3D7_0819800	157.78	-1.5535	0.118029			0.928011
PF3D7_0803400	Q8IAN4	PF3D7_0803400	692.251	-1.88009	0.119251			0.923538
PF3D7_1241800	Q8I511	PF3D7_1241800	3248.9	1.16	0.119407			0.92297
PF3D7_0935800	Q8I2G2	PF3D7_0935800	625.778	-2.00471	0.119675			0.921997
PF3D7_1120400	Q8IIG3	PF3D7_1120400	643.014	1.18335	0.119675			0.921997
PF3D7_1301900	Q8IEI7	PF3D7_1301900	3.63821	5.55704	0.119675			0.921997
PF3D7_0402300	B9ZSJ4	PF3D7_0402300	621.964	-1.85904	0.119698			0.921913
PF3D7_0526500	Q8I3K0	PF3D7_0526500	1073.86	1.25352	0.119698			0.921913
PF3D7_1251300	Q8I4S1	PF3D7_1251300	90.5499	-1.50533	0.119976			0.920906
PF3D7_1304000	C0H598	PF3D7_1304000	162.244	-1.73042	0.120219			0.920027
PF3D7_1348600	A0A5K1K8Z2	PF3D7_1348600	18.495	-2.82216	0.120419			0.919305
PF3D7_1138500	Q8IHY0	PF3D7_1138500	2675.93	1.12565	0.120491			0.919045
PF3D7_1209400	Q8I5V5	PF3D7_1209400	202.364	-1.44713	0.120491			0.919045
PF3D7_1140800	Q8IHV7	PF3D7_1140800	650.577	1.22706	0.120491			0.919045
PF3D7_0112900	Q9U0N2	PF3D7_0112900	472.109	1.22993	0.120491			0.919045
PF3D7_1421900	Q8ILN2	PF3D7_1421900	85.8442	-1.73735	0.120491			0.919045
PF3D7_1463400	Q8IKK2	PF3D7_1463400	716.608	1.21754	0.120717			0.918232
PF3D7_MIT02000	PF3D7_MIT02000	PF3D7_MIT02000	123.381	-1.7639	0.120717			0.918232
PF3D7_1432400	Q8ILD9	PF3D7_1432400	43.9792	-1.9845	0.120717			0.918232
PF3D7_0416000	Q8I1S7	PF3D7_0416000	670.187	-1.04333	0.120979			0.91729
PF3D7_1356100	Q8IDE1	PF3D7_1356100	230.316	-1.82142	0.120979			0.91729
PF3D7_1404600	PF3D7_1404600	PF3D7_1404600	63.4787	-1.51592	0.120979			0.91729
PF3D7_0522500	C0H4F9	PF3D7_0522500	35.1475	-1.83276	0.120979			0.91729
PF3D7_0321300	O97288	PF3D7_0321300	25.3507	-2.22481	0.121077			0.916938
PF3D7_0711100	Q8IBX9	PF3D7_0711100	148.025	1.43653	0.121089			0.916895
PF3D7_1235300	Q8I569	PF3D7_1235300	17421.4	1.16219	0.121298			0.916146
PF13_0233	Q8IDR3	PF3D7_1342600	1683.65	-1.79562	0.121298			0.916146
PF3D7_1142100	Q8IHU4	PF3D7_1142100	5390.7	1.2739	0.121298			0.916146
PF3D7_0519700	C0H4F1	PF3D7_0519700	3621.08	1.26774	0.121298			0.916146
PF3D7_1251600	Q8I4R8	PF3D7_1251600	1780.37	1.16795	0.121298			0.916146
SETVS	Q8IE95	PF3D7_1322100	1791.77	1.12857	0.121298			0.916146
PF3D7_0819500	C0H4W0	PF3D7_0819500	344.808	-1.38946	0.121298			0.916146
PF3D7_1135400	Q8II11	PF3D7_1135400	776.536	1.21706	0.121298			0.916146
PF3D7_1404500	Q8IM49	PF3D7_1404500	886.387	1.13499	0.121298			0.916146
PF3D7_1345600	A0A5K1K8Y1	PF3D7_1345600	83.3312	-1.98578	0.121298			0.916146
PF3D7_0519300	Q8I0W6	PF3D7_0519300	136.132	-1.42274	0.121298			0.916146
PF3D7_0515400	C0H4E0	PF3D7_0515400	55.8513	-2.31185	0.121298			0.916146
PF3D7_0311300	O77353	PF3D7_0311300	267.121	-1.69532	0.12209			0.91332
PF3D7_0936400	Q8I2F6	PF3D7_0936400	784.308	1.22939	0.12209			0.91332
PF3D7_1340900	Q8IDS7	PF3D7_1340900	2567.86	1.19638	0.122403			0.912208
PF3D7_0404000	Q8I1Y9	PF3D7_0404000	19.8428	-2.36334	0.122403			0.912208
PF3D7_0606000	C6KSQ8	PF3D7_0606000	5166.01	1.18963	0.122587			0.911556
PF3D7_1470200	Q8IKD6	PF3D7_1470200	523.577	1.25901	0.123107			0.909717
PF3D7_0803300	Q8IAN3	PF3D7_0803300	65.0746	-1.65898	0.123336			0.90891
PF3D7_0321500	O97289	PF3D7_0321500	371.073	-1.21855	0.123897			0.906939
PF3D7_0931900	C0H582	PF3D7_0931900	16.2025	-2.35107	0.123897			0.906939
PF3D7_1025900	A0A143ZYA5	PF3D7_1025900	461.391	-1.67106	0.124438			0.905047
PF3D7_1319600	A0A5K1K8F4	PF3D7_1319600	47.0921	-1.97064	0.125032			0.902979
PF3D7_1447200	Q8IL00	PF3D7_1447200	2452.65	1.08023	0.125038			0.902958
PF3D7_1419100	Q8ILQ9	PF3D7_1419100	1567.37	1.17351	0.125038			0.902958
PF3D7_1201000	Q8I635	PF3D7_1201000	13396.8	-1.32902	0.125052			0.902909
PF3D7_1006500	Q8IJX6	PF3D7_1006500	76.3599	-1.3848	0.125052			0.902909
PF3D7_1001600	Q8IK20	PF3D7_1001600	1415.81	-1.89592	0.125133			0.902628
PF14_0076	Q7KQM4	PF3D7_1407900	4498.91	1.20085	0.125133			0.902628
PF3D7_1004300	Q8IJZ4	PF3D7_1004300	4092.08	1.19432	0.125133			0.902628
PF3D7_1016700	Q8IJN1	PF3D7_1016700	1637.25	1.25897	0.125133			0.902628
PF3D7_1418900	C6S3H8	PF3D7_1418900	1858.65	1.20174	0.125133			0.902628
PF3D7_1343300	A0A5K1K996	PF3D7_1343300	834.729	-1.18669	0.125133			0.902628
PF3D7_1210600	Q8I5U3	PF3D7_1210600	1699.04	1.05661	0.125133			0.902628
PF3D7_1228700	Q8I5D1	PF3D7_1228700	233.155	-1.70661	0.125133			0.902628
PF3D7_1119200	A0A143ZYQ2	PF3D7_1119200	899.854	1.10347	0.125133			0.902628
PF3D7_1221000	Q8I5K3	PF3D7_1221000	247.108	-1.50227	0.125133			0.902628
PF3D7_0611600	C6KSW1	PF3D7_0611600	161.485	-1.76311	0.125133			0.902628
PF3D7_1215300	Q8I5Q3	PF3D7_1215300	258.044	-1.34526	0.125133			0.902628
PF3D7_0216600	O96245	PF3D7_0216600	738.047	1.14992	0.125133			0.902628
PF3D7_1334100	A0A5K1K8V1	PF3D7_1334100	195.994	-1.27234	0.125133			0.902628
PF3D7_0309800	O77335	PF3D7_0309800	373.457	1.18359	0.125133			0.902628
PF3D7_0915700	Q8I2Z5	PF3D7_0915700	53.9072	-2.0498	0.125133			0.902628
PF3D7_1005900	Q8IJY1	PF3D7_1005900	60.6349	-1.71699	0.125133			0.902628
PF3D7_0308700	O77326	PF3D7_0308700	38.4038	-2.13592	0.125133			0.902628
PF3D7_0512300	Q8I3Y3	PF3D7_0512300	211.81	1.20764	0.125133			0.902628
PF3D7_1247800	Q8I0V1	PF3D7_1247800	32.8496	-2.38516	0.125133			0.902628
PF3D7_1425400	Q8ILK9	PF3D7_1425400	61.6559	-1.78753	0.125133			0.902628
PF3D7_0816700	C0H4V0	PF3D7_0816700	44.8029	-1.63681	0.125133			0.902628
PF3D7_1138100	Q8IHY3	PF3D7_1138100	44.9523	1.72747	0.125133			0.902628
PF3D7_1122300	Q8IIE3	PF3D7_1122300	115.157	1.46405	0.125189			0.902434
PF3D7_1401400	Q7KQM5	PF3D7_1401400	10268.4	1.29409	0.125421			0.90163
PF3D7_0424700	Q8IFL9	PF3D7_0424700	11069.1	1.15855	0.125421			0.90163
PF3D7_1329500	A0A5K1K8J1	PF3D7_1329500	7531.96	1.24036	0.125421			0.90163
PF3D7_0607600	C6KSS4	PF3D7_0607600	339.315	-1.66423	0.125421			0.90163
PF3D7_1035700	Q8IJ52	PF3D7_1035700	221.22	-1.90052	0.125421			0.90163
PF3D7_1250600	Q8I4S8	PF3D7_1250600	812.242	1.09691	0.125421			0.90163
PF3D7_0415500	Q8I1T2	PF3D7_0415500	648.47	1.1675	0.125421			0.90163
PF3D7_1224100	Q8I5H6	PF3D7_1224100	116.933	-1.72561	0.125421			0.90163
PF3D7_0703400	A0A5K1K8R2	PF3D7_0703400	141.218	-1.33155	0.125421			0.90163
PF3D7_0317100	C0H478	PF3D7_0317100	42.4195	-1.6483	0.125421			0.90163
PF3D7_0519000	Q8I3R9	PF3D7_0519000	52.5892	-1.60532	0.125421			0.90163
PF3D7_1341800	Q8IDS1	PF3D7_1341800	21.5783	-2.37657	0.125421			0.90163
PF3D7_0932000	C0H583	PF3D7_0932000	110.939	-1.71847	0.125463			0.901484
MAL8P1.12	Q8IBB8	PF3D7_0828700	31.6189	-2.21297	0.125739			0.90053
PF3D7_0929600	Q8I2L4	PF3D7_0929600	21.8692	-2.40369	0.126025			0.899543
PF3D7_1118300	Q8III5	PF3D7_1118300	5059.1	1.12978	0.126171			0.89904
PF3D7_1140200	Q8IHW3	PF3D7_1140200	1290.15	-1.16627	0.126171			0.89904
PF3D7_0303200	O77317	PF3D7_0303200	666.722	-1.42282	0.126171			0.89904
PF3D7_0508100	Q8I422	PF3D7_0508100	319.254	-2.00711	0.126171			0.89904
PF3D7_0213900	O96219	PF3D7_0213900	1029.4	1.22467	0.126171			0.89904
PF3D7_0218400	O96264	PF3D7_0218400	1001.83	1.19808	0.126171			0.89904
PF3D7_0208000	O96167	PF3D7_0208000	178.203	-1.92047	0.126171			0.89904
PF3D7_1019100	Q8IJL1	PF3D7_1019100	162.637	-1.87366	0.126171			0.89904
PF3D7_1231200	Q8I5A8	PF3D7_1231200	68.2113	-1.94629	0.126171			0.89904
PF3D7_1024400	Q8IJG1	PF3D7_1024400	33.1294	-2.34926	0.126171			0.89904
PF3D7_0811700	Q8IAV2	PF3D7_0811700	13.5103	-2.99287	0.126171			0.89904
PF3D7_1401700	Q8IM72	PF3D7_1401700	8.49944	-3.06187	0.126171			0.89904
PF3D7_0306000	Q9NLB3	PF3D7_0306000	32.4815	-1.82614	0.126986			0.896244
PF3D7_1031800	Q8IJ87	PF3D7_1031800	82.3046	-1.732	0.127209			0.895482
PF3D7_1102700	Q7KQK8	PF3D7_1102700	10194.8	1.22564	0.127396			0.894844
PF3D7_1253200	Q8I4Q4	PF3D7_1253200	519.765	1.20725	0.127396			0.894844
PF3D7_1136200	Q8II02	PF3D7_1136200	102.03	-2.0606	0.127396			0.894844
PF3D7_1132600	Q8II38	PF3D7_1132600	732.495	1.08101	0.127396			0.894844
PF3D7_MIT03600	PF3D7_MIT03600	PF3D7_MIT03600	61.3233	-1.87595	0.127396			0.894844
PF3D7_0810900	PF3D7_0810900	PF3D7_0810900	34.4337	-2.10249	0.127396			0.894844
PF3D7_0615200	C6KSZ3	PF3D7_0615200	19.4426	-2.46789	0.127453			0.89465
PF3D7_0323700	O97303	PF3D7_0323700	2608.18	1.04806	0.127542			0.894347
PF3D7_1445100	Q8IL22	PF3D7_1445100	518.923	1.28018	0.127542			0.894347
PF3D7_1204100	Q8I605	PF3D7_1204100	188.852	-1.18606	0.127542			0.894347
PF3D7_1442500	Q8IL46	PF3D7_1442500	124.403	-1.30454	0.127542			0.894347
PF3D7_0211400	Q7KWI9	PF3D7_0211400	18.6256	-2.2605	0.127542			0.894347
PF3D7_1450400	Q8IKX2	PF3D7_1450400	2243.78	1.12812	0.127603			0.894139
PF3D7_1010300	Q8IJU2	PF3D7_1010300	1405.51	1.19772	0.127603			0.894139
PF3D7_0933000	Q8I0W1	PF3D7_0933000	1136.53	1.06354	0.127603			0.894139
PF3D7_1009800	Q8IJU7	PF3D7_1009800	589.654	1.20718	0.127603			0.894139
PF3D7_MIT04000	PF3D7_MIT04000	PF3D7_MIT04000	722.377	-1.24161	0.127671			0.893908
PF3D7_0612200	C6KSW6	PF3D7_0612200	415.341	-1.68968	0.127792			0.893496
PF3D7_0200100	O96108	PF3D7_0200100	415.923	5.75219	0.127792			0.893496
PF3D7_0212900	O96210	PF3D7_0212900	213.013	-1.66068	0.127792			0.893496
PF3D7_1344300	C0H5H1	PF3D7_1344300	110.309	-1.6157	0.127792			0.893496
PF3D7_0726700	Q8IBI9	PF3D7_0726700	72.3197	-1.54017	0.127792			0.893496
PF3D7_1253400	Q8I0X2	PF3D7_1253400	23.3369	-1.93867	0.127792			0.893496
PF3D7_1312000	Q8I6Z9	PF3D7_1312000	19.4586	-2.07818	0.127792			0.893496
PF3D7_0322200	O97294	PF3D7_0322200	14.6494	-2.28792	0.127792			0.893496
PF3D7_0716300	Q8IBT7	PF3D7_0716300	2191.79	-1.27313	0.128619			0.890695
PF3D7_1251100	Q8I4S3	PF3D7_1251100	479.357	1.14665	0.128619			0.890695
PF3D7_0825500	Q8IB88	PF3D7_0825500	3062.78	1.14668	0.129053			0.889232
PF3D7_1405900	A0A144A153	PF3D7_1405900	3067.95	1.12085	0.129053			0.889232
PF3D7_1227800	Q8I5E0	PF3D7_1227800	2267.88	1.19386	0.129053			0.889232
PF3D7_1364200	A0A5K1K9A0	PF3D7_1364200	1535.5	1.11909	0.129053			0.889232
PF3D7_1340700	C0H5G2	PF3D7_1340700	119.443	-1.54076	0.129053			0.889232
PF3D7_1349600	A0A5K1K8Z5	PF3D7_1349600	179.202	-1.42255	0.129053			0.889232
PF3D7_0417600	Q8I1R1	PF3D7_0417600	39.0014	-2.34796	0.129053			0.889232
PF3D7_1003000	Q8IK06	PF3D7_1003000	42.5735	-2.06936	0.129053			0.889232
PF3D7_0307700	O97255	PF3D7_0307700	811.742	-1.39381	0.129169			0.888842
PF3D7_0524100	Q8I3M4	PF3D7_0524100	1467.69	1.05139	0.129169			0.888842
PF3D7_0813000	A0A5K1K7Z9	PF3D7_0813000	1070.27	1.08502	0.129169			0.888842
PF3D7_1472200	A0A144A4T0	PF3D7_1472200	6171.68	1.10916	0.129989			0.886093
PF3D7_0722500	Q8IBM8	PF3D7_0722500	1189.16	1.17163	0.129989			0.886093
PF3D7_1304500	Q8IES0	PF3D7_1304500	247.021	-1.42282	0.129989			0.886093
PF3D7_0710700	Q8IBY3	PF3D7_0710700	2168.66	1.06471	0.130223			0.885312
PF3D7_0403900	Q8I1Z0	PF3D7_0403900	51.1919	-1.85398	0.130223			0.885312
PF3D7_1310200	C0H5A9	PF3D7_1310200	14.6245	-2.65087	0.130223			0.885312
PF3D7_0610500	C6KSV1	PF3D7_0610500	759.773	-1.24429	0.130542			0.88425
PF3D7_MIT01200	PF3D7_MIT01200	PF3D7_MIT01200	26.1995	-2.19629	0.130554			0.88421
PF3D7_1406600	Q8IM28	PF3D7_1406600	298.264	-1.36939	0.130603			0.884047
SERA	Q9TY95	PF3D7_0207600	3520.11	-1.94597	0.131045			0.88258
PF3D7_1025000	Q8IJF4	PF3D7_1025000	2248.84	1.04795	0.131045			0.88258
PF3D7_0410700	Q9U0I1	PF3D7_0410700	393.453	-1.56195	0.131045			0.88258
PF3D7_1451700	Q8IKV9	PF3D7_1451700	70.6974	-2.11242	0.131045			0.88258
PF3D7_0612400	C0H4H4	PF3D7_0612400	25.0986	-2.08156	0.131045			0.88258
PF3D7_1210900	Q8I5U1	PF3D7_1210900	28.123	-2.10641	0.131045			0.88258
PF3D7_1143600	Q8IHT0	PF3D7_1143600	19.5574	-2.37474	0.131045			0.88258
PF3D7_1122700	Q8IID6	PF3D7_1122700	20.4072	-2.04864	0.131045			0.88258
PF3D7_0624600	C6KT82	PF3D7_0624600	12830.6	1.12393	0.131251			0.881897
PF3D7_0420100	Q8I1N8	PF3D7_0420100	1587.59	1.07538	0.131251			0.881897
PF3D7_1472000	Q8IKB8	PF3D7_1472000	354.342	1.1451	0.131349			0.881573
PF3D7_0715200	Q8IBU8	PF3D7_0715200	200.017	-1.65496	0.131593			0.880767
PF3D7_0414700	Q8I1U1	PF3D7_0414700	141.215	-1.28687	0.131593			0.880767
PF3D7_0202700	O96130	PF3D7_0202700	64.3114	-1.49131	0.131593			0.880767
PF3D7_0818700	C0H4V8	PF3D7_0818700	1629.22	1.08301	0.131771			0.88018
PF3D7_0203200	C6S3A8	PF3D7_0203200	209.52	1.23384	0.131886			0.879801
PF3D7_0501300	Q8I487	PF3D7_0501300	29858.7	1.11019	0.132669			0.877231
PF3D7_0201800	O96123	PF3D7_0201800	4493.92	1.22581	0.132669			0.877231
PF3D7_1361100	C0H5J6	PF3D7_1361100	4115.62	1.12893	0.132669			0.877231
PF3D7_1022600	Q8IJH9	PF3D7_1022600	2716.09	1.12356	0.132669			0.877231
PF3D7_0423400	Q8IFN2	PF3D7_0423400	35.4563	-2.25915	0.132669			0.877231
PF3D7_0425400	Q8IFL1	PF3D7_0425400	1334.42	1.31781	0.132692			0.877155
PF3D7_0609100	C6KST8	PF3D7_0609100	799.946	1.10193	0.132692			0.877155
PF3D7_0804800	Q8I6S4	PF3D7_0804800	767.662	1.08762	0.132692			0.877155
CyRPA	Q8IFM8	PF3D7_0423800	75.0848	-1.55586	0.132692			0.877155
PF3D7_1105200	Q8IIV0	PF3D7_1105200	15.026	-2.05429	0.132692			0.877155
PF3D7_0906000	C0H520	PF3D7_0906000	170.865	-1.30386	0.132764			0.87692
PF3D7_0313600	O77337	PF3D7_0313600	252.085	-1.54201	0.132956			0.876292
PF3D7_1474400	Q8IK94	PF3D7_1474400	105.066	-1.57893	0.132956			0.876292
PF3D7_1020400	Q8IJJ8	PF3D7_1020400	366.258	1.15778	0.132956			0.876292
PF3D7_0821400	Q8IB48	PF3D7_0821400	319.336	1.10275	0.132956			0.876292
PF45/48	Q8I6T1	PF3D7_1346700	16.7776	-2.29224	0.132956			0.876292
PF3D7_1246900	Q8I4W3	PF3D7_1246900	73.7302	-1.56909	0.133184			0.875548
PF3D7_1136400	Q8II00	PF3D7_1136400	2326.77	1.10227	0.133229			0.875401
PF3D7_1011900	Q8IJS6	PF3D7_1011900	150.449	-1.19963	0.133327			0.875082
PF3D7_1319300	Q8IEC3	PF3D7_1319300	1908.73	1.21116	0.133354			0.874994
PF3D7_0301800	O97332	PF3D7_0301800	860.29	1.26719	0.133354			0.874994
PF3D7_0518600	Q8I3S4	PF3D7_0518600	266.207	-1.37328	0.133354			0.874994
PF3D7_1012600	Q8IJR9	PF3D7_1012600	2344.24	1.14128	0.133478			0.87459
PF3D7_1019600	Q8IJK6	PF3D7_1019600	75.3757	-1.77573	0.133638			0.87407
PF3D7_0221200	Q8I652	PF3D7_0221200	337.513	-1.15281	0.133759			0.873677
PF3D7_1021500	Q8IJI8	PF3D7_1021500	839.818	1.09275	0.133913			0.873177
PF3D7_0827300	Q8IBA5	PF3D7_0827300	736.404	1.10069	0.13397			0.872992
PF3D7_1359600	A0A5K1K8U0	PF3D7_1359600	1864.33	-1.43599	0.134194			0.872267
PF3D7_0207000	Q7KWJ2	PF3D7_0207000	473.636	-1.61662	0.134194			0.872267
PF3D7_1417500	Q8ILS0	PF3D7_1417500	1268.07	1.13612	0.134194			0.872267
PF3D7_0828200	Q8IBB3	PF3D7_0828200	577.117	-1.1396	0.134473			0.871365
PF3D7_1231300	Q8I5A7	PF3D7_1231300	8.49606	-3.27133	0.135082			0.869403
PF3D7_1211700	Q8I5T4	PF3D7_1211700	674.006	-1.61408	0.13539			0.868413
PF3D7_1338700	A0A5K1K8M0	PF3D7_1338700	209.668	-1.48605	0.13539			0.868413
PF3D7_1225300	Q8I5G4	PF3D7_1225300	804.999	1.08509	0.135578			0.867811
PF3D7_1024000	Q8IJG5	PF3D7_1024000	231.49	-1.14682	0.135592			0.867766
PF3D7_1103800	Q8IIW4	PF3D7_1103800	1750.14	-1.18491	0.136006			0.866442
PF3D7_1313800	C0H5B3	PF3D7_1313800	2421.67	1.20267	0.136006			0.866442
PF3D7_0814300	Q8IAX9	PF3D7_0814300	863.013	1.16887	0.136006			0.866442
PF3D7_0313000	O77363	PF3D7_0313000	469.998	1.09957	0.136006			0.866442
PF3D7_0701700	Q8IC50	PF3D7_0701700	3.6232	4.52796	0.136006			0.866442
PF3D7_1232200	Q8I5A0	PF3D7_1232200	47.3697	-1.41301	0.136096			0.866155
PF3D7_1224300	Q8I5H4	PF3D7_1224300	61793.6	1.12654	0.136231			0.865724
PF3D7_0322100	C0H484	PF3D7_0322100	976.547	1.17306	0.136499			0.864871
PF3D7_0530300	C0H4G8	PF3D7_0530300	91.8862	-1.89278	0.136502			0.864861
PF3D7_MIT03800	PF3D7_MIT03800	PF3D7_MIT03800	74.8698	-1.69481	0.136631			0.864451
PF3D7_0707200	C0H4L9	PF3D7_0707200	148.016	-1.50814	0.13698			0.863343
PF3D7_1416500	Q8ILT0	PF3D7_1416500	129.42	1.33521	0.13698			0.863343
PF3D7_0629800	C6KTD3	PF3D7_0629800	1577.71	1.08757	0.137289			0.862364
PF3D7_0914100	C0H536	PF3D7_0914100	283.27	-1.57724	0.137289			0.862364
PF3D7_0615800	C6KSZ9	PF3D7_0615800	184.606	-1.18197	0.137289			0.862364
PF3D7_1345500	Q8IDP1	PF3D7_1345500	33.4789	-1.64166	0.137289			0.862364
PF3D7_1370300	C0H5L9	PF3D7_1370300	11288.4	1.25117	0.137657			0.861202
PF3D7_0217000	O96251	PF3D7_0217000	40.845	-1.73786	0.137657			0.861202
PF3D7_1218300	Q8I5M5	PF3D7_1218300	443.904	1.09018	0.137678			0.861135
PF3D7_0922100	Q8I2T2	PF3D7_0922100	12198.2	1.14457	0.138171			0.859583
PF3D7_0627100	C6KTA7	PF3D7_0627100	2754.29	1.11725	0.138171			0.859583
PF3D7_1458000	Q8I6V0	PF3D7_1458000	1541.42	1.1251	0.138171			0.859583
PF3D7_1035800	Q8IJ50	PF3D7_1035800	762.054	1.43971	0.138171			0.859583
PF3D7_0218700	O96267	PF3D7_0218700	1322.44	1.09099	0.138171			0.859583
PF3D7_1458500	Q8IKP6	PF3D7_1458500	317.567	-1.31386	0.138171			0.859583
PF92	Q8ID66	PF3D7_1364100	218.875	-1.50994	0.138171			0.859583
PF3D7_0615000	C6KSZ1	PF3D7_0615000	255.949	1.22445	0.138171			0.859583
PF3D7_1417300	Q8ILS3	PF3D7_1417300	54.2792	-1.64793	0.138171			0.859583
PF3D7_0523300	Q8I3N1	PF3D7_0523300	68.9416	-1.38534	0.138171			0.859583
PF3D7_1342500	Q8IDR4	PF3D7_1342500	35.5467	-1.73677	0.138171			0.859583
PF3D7_0903800	Q8I3B1	PF3D7_0903800	16.2799	-2.47841	0.138171			0.859583
PF3D7_0620700	C6KT47	PF3D7_0620700	34.9759	-1.98041	0.138245			0.859351
PF3D7_1472100	Q8IKB7	PF3D7_1472100	809.347	1.0849	0.138836			0.857498
PF3D7_0320400	O97283	PF3D7_0320400	45.1911	-1.54917	0.138836			0.857498
PF3D7_0930100	C0H575	PF3D7_0930100	99.2727	-1.19534	0.139005			0.85697
PF3D7_0803100	Q8IAN1	PF3D7_0803100	4313.3	1.0868	0.139883			0.854235
PF3D7_1323600	Q8IE81	PF3D7_1323600	94.3452	-1.32425	0.139883			0.854235
PF3D7_1230700	Q8I5B3	PF3D7_1230700	3954.39	1.02303	0.139899			0.854185
PF3D7_0730500	Q8IBF4	PF3D7_0730500	480.46	-1.4011	0.139899			0.854185
PF3D7_1450100	Q8IKX4	PF3D7_1450100	1230.32	1.1523	0.139899			0.854185
PF3D7_0318600	O77371	PF3D7_0318600	873.676	1.08241	0.139899			0.854185
PF3D7_0507200	Q8I430	PF3D7_0507200	122.073	-1.424	0.139899			0.854185
PF3D7_0506400	A0A5K1K846	PF3D7_0506400	4.16208	-4.29688	0.139899			0.854185
PF3D7_1475600	Q8IK82	PF3D7_1475600	1292.99	1.12048	0.139908			0.854157
PF3D7_1133900	Q8II26	PF3D7_1133900	1306.91	1.00937	0.139983			0.853925
PF3D7_1449100	Q8IKY3	PF3D7_1449100	151.825	-1.7157	0.139983			0.853925
MSA2	P50498	PF3D7_0206800	1570.89	-1.3572	0.140024			0.853798
PF3D7_1024300	Q8IJG2	PF3D7_1024300	98.4002	-1.75778	0.140024			0.853798
PF3D7_0602800	C6KSM8	PF3D7_0602800	102.62	1.35113	0.140024			0.853798
PF3D7_0214100	O96221	PF3D7_0214100	5791.99	1.08383	0.140495			0.852339
RIPR	O97302	PF3D7_0323400	319.464	-1.79215	0.140495			0.852339
PF3D7_1352200	A0A5K1K8T1	PF3D7_1352200	1289.45	1.13932	0.140495			0.852339
PF3D7_0719400	Q8IBQ8	PF3D7_0719400	365.232	-1.36181	0.140495			0.852339
PF3D7_0526300	Q8I3K2	PF3D7_0526300	543.558	1.24058	0.140495			0.852339
PF3D7_0625400	C6KT90	PF3D7_0625400	479.399	1.26357	0.140495			0.852339
PF3D7_0303400	O97224	PF3D7_0303400	70.3247	-1.81361	0.140495			0.852339
PF07_0021	Q8IC19	PF3D7_0705100	41.0149	-1.7621	0.140495			0.852339
FEN1	Q7K734	PF3D7_0408500	211.879	-1.58669	0.14079			0.851428
PF3D7_1448400	Q8IKY9	PF3D7_1448400	204.87	-1.33563	0.14079			0.851428
PF3D7_1321500	PF3D7_1321500	PF3D7_1321500	214.317	-1.75483	0.140798			0.851404
PF3D7_1419400	Q8ILQ6	PF3D7_1419400	1983.1	1.15204	0.140857			0.851222
PF3D7_0501800	Q8I482	PF3D7_0501800	628.186	-1.33453	0.140857			0.851222
PF3D7_0408100	Q9U0K5	PF3D7_0408100	453.731	1.06742	0.140857			0.851222
PF3D7_0410300	Q9U0I5	PF3D7_0410300	594.44	1.00457	0.140857			0.851222
PF3D7_1470300	Q8IKD5	PF3D7_1470300	344.893	1.12043	0.140857			0.851222
PF3D7_1331500	A0A5K1K8J9	PF3D7_1331500	74.3668	-1.41202	0.140857			0.851222
PF3D7_1455900	C6S3J5	PF3D7_1455900	33.687	-1.77629	0.140857			0.851222
PFS38	Q8I423	PF3D7_0508000	138.217	-1.79915	0.14089			0.85112
PF3D7_1333400	C0H5F2	PF3D7_1333400	1059.45	1.10099	0.141287			0.849898
PF3D7_1117500	Q8IIJ2	PF3D7_1117500	101.674	-1.44752	0.141515			0.849198
PF3D7_0904400	Q8I3A5	PF3D7_0904400	51.8862	-1.34033	0.141929			0.847929
PF3D7_0206700	Q7KWJ4	PF3D7_0206700	1579.11	-1.34401	0.142513			0.846146
PF3D7_0613800	C6KSY0	PF3D7_0613800	1062.65	-1.90021	0.142513			0.846146
PF3D7_0919400	Q8I2V9	PF3D7_0919400	172.992	-1.57639	0.142513			0.846146
PF3D7_0603500	C6KSN3	PF3D7_0603500	83.6449	-1.4597	0.142513			0.846146
PF3D7_0720100	Q8IBQ1	PF3D7_0720100	375.346	1.05391	0.142513			0.846146
PF3D7_0406800	Q8I1W3	PF3D7_0406800	80.2843	-1.39456	0.142513			0.846146
PF3D7_1422600	Q8ILM7	PF3D7_1422600	52.4734	-1.62628	0.142513			0.846146
PF3D7_0832000	A0A143ZWI7	PF3D7_0832000	4.81858	3.88835	0.142857			0.845098
PF3D7_1234900	Q8I573	PF3D7_1234900	320.438	-1.63833	0.142878			0.845035
PF3D7_0302000	O97334	PF3D7_0302000	892.351	1.04009	0.142878			0.845035
PFL2310w	Q8I4V2	PF3D7_1248200	481.444	1.09635	0.142878			0.845035
PF3D7_0716500	C0H4M9	PF3D7_0716500	111.244	-1.36909	0.142878			0.845035
PF3D7_0715100	Q8IBU9	PF3D7_0715100	5.80094	-3.93898	0.142878			0.845035
PF3D7_1202700	Q8I618	PF3D7_1202700	1088.32	1.11319	0.14291			0.844937
PF3D7_0905200	Q8I397	PF3D7_0905200	890.382	1.13317	0.14291			0.844937
PF3D7_1227500	Q8I5E3	PF3D7_1227500	773.681	-1.56108	0.142911			0.844934
PF3D7_1302700	Q8IET8	PF3D7_1302700	3024.56	1.10739	0.143449			0.843302
PF3D7_0524400	A0A5K1K870	PF3D7_0524400	1990.6	1.0803	0.143449			0.843302
PF3D7_1125700	Q8IIA7	PF3D7_1125700	305.806	-1.76449	0.143449			0.843302
PF3D7_0703600	PF3D7_0703600	PF3D7_0703600	221.413	-1.55371	0.143449			0.843302
PF3D7_1437000	Q8IL96	PF3D7_1437000	1114.65	1.06339	0.143449			0.843302
PF3D7_1356300	Q8IDD9	PF3D7_1356300	151.573	-1.51496	0.143449			0.843302
PF3D7_0930800	C0H577	PF3D7_0930800	194.078	-1.24161	0.143449			0.843302
PF3D7_0503200	Q8I469	PF3D7_0503200	128.382	-1.46869	0.143449			0.843302
PF3D7_0414600	Q8I1U2	PF3D7_0414600	75.3169	-1.69142	0.143449			0.843302
PF3D7_0518000	C0H4E6	PF3D7_0518000	384.477	1.09039	0.143449			0.843302
PF3D7_1421300	Q8ILN7	PF3D7_1421300	58.0304	-1.65024	0.143449			0.843302
PF3D7_1140900	Q8IHV6	PF3D7_1140900	55.0847	-1.44674	0.143449			0.843302
PF3D7_0908100	C0H525	PF3D7_0908100	12.0169	-2.31857	0.143449			0.843302
PF3D7_0916700	Q8I2Y5	PF3D7_0916700	1852.28	1.23512	0.143594			0.842864
PF3D7_1414400	Q8ILV1	PF3D7_1414400	624.565	-1.21959	0.143594			0.842864
PF3D7_0409700	Q8I1W0	PF3D7_0409700	62.1814	-1.28524	0.143594			0.842864
PF3D7_0720700	Q8IBP4	PF3D7_0720700	3451.75	1.10965	0.143721			0.84248
PF3D7_MIT03700	PF3D7_MIT03700	PF3D7_MIT03700	99.4349	-1.68274	0.143721			0.84248
PF3D7_1477300	Q8IK62	PF3D7_1477300	62.7216	1.60185	0.143721			0.84248
PF3D7_1441100	Q8IL59	PF3D7_1441100	10015.3	0.962429	0.143763			0.842353
PF3D7_0924600	Q8I2R1	PF3D7_0924600	160.829	-1.58223	0.143763			0.842353
PF3D7_0918800	Q8I2W5	PF3D7_0918800	672.328	1.18141	0.143763			0.842353
PF3D7_0815900	Q8IAZ6	PF3D7_0815900	41.5498	-1.7767	0.143763			0.842353
PF3D7_0528300	Q8I3I4	PF3D7_0528300	19.5544	-2.24887	0.143763			0.842353
PF3D7_0624100	C6KT77	PF3D7_0624100	122.806	-1.41681	0.143801			0.842238
PF3D7_1358100	A0A5K1K911	PF3D7_1358100	5230.26	1.06624	0.143823			0.842172
PF3D7_1134300	Q8II21	PF3D7_1134300	385.937	-1.56177	0.143823			0.842172
PF3D7_1143800	Q8IHS7	PF3D7_1143800	857.371	1.106	0.143823			0.842172
PF3D7_0914700	Q8I305	PF3D7_0914700	642.939	1.21205	0.143823			0.842172
PF3D7_1354300	Q8IDF8	PF3D7_1354300	7279.91	1.08365	0.144052			0.841481
PF3D7_1353200	Q8IDG8	PF3D7_1353200	4391.53	1.21099	0.144052			0.841481
PF3D7_1320000	A0A5K1K8Q9	PF3D7_1320000	1445.74	1.13948	0.144052			0.841481
PF3D7_0409600	Q9U0J0	PF3D7_0409600	635.211	-1.13381	0.144052			0.841481
PF3D7_1307100	Q8IEP4	PF3D7_1307100	704.198	1.06145	0.144052			0.841481
PF3D7_1213600	Q8I5R9	PF3D7_1213600	110.806	-1.38157	0.144052			0.841481
PF3D7_1012300	Q8IJS2	PF3D7_1012300	71.1087	-1.48703	0.144052			0.841481
PF3D7_1313500	Q8IEH8	PF3D7_1313500	28.3314	-2.17959	0.144052			0.841481
PF3D7_1032100	Q8IJ85	PF3D7_1032100	2442	1.10042	0.14451			0.840102
PF3D7_1107100	Q8IIT2	PF3D7_1107100	175.499	-1.57718	0.14451			0.840102
PF3D7_1235800	Q8I565	PF3D7_1235800	46.7578	-1.49412	0.14451			0.840102
PF3D7_1238800	Q8I535	PF3D7_1238800	3847.95	0.99655	0.144954			0.83877
PF3D7_1303400	Q8IET1	PF3D7_1303400	3246.45	1.01647	0.144954			0.83877
PF3D7_1361700	A0A5K1K9B3	PF3D7_1361700	123.851	-1.62616	0.144954			0.83877
PF3D7_0613600	C6KSX8	PF3D7_0613600	94.5513	-1.56409	0.144954			0.83877
PF3D7_1019800	Q8IJK4	PF3D7_1019800	158.001	-1.4463	0.144972			0.838716
PF3D7_1309700	Q8IEL8	PF3D7_1309700	327.186	1.19671	0.145172			0.838117
PF3D7_0913300	Q8I319	PF3D7_0913300	2252.34	1.13662	0.145523			0.837068
PF3D7_1450700	Q8IKW9	PF3D7_1450700	4022.25	1.04849	0.145801			0.836239
PF3D7_1007700	Q8IJW6	PF3D7_1007700	4122.87	-0.977292	0.146329			0.83467
PF3D7_0628300	PF3D7_0628300	PF3D7_0628300	1302.76	-1.20042	0.146329			0.83467
PF3D7_0402200	PF3D7_0402200	PF3D7_0402200	814.072	-1.81341	0.146329			0.83467
PF3D7_0925200	Q8I2Q6	PF3D7_0925200	1777.87	0.996142	0.146329			0.83467
PF3D7_1464900	Q8IKI9	PF3D7_1464900	1891.52	1.08051	0.146329			0.83467
PF3D7_1213900	A0A144A0U7	PF3D7_1213900	1192.55	1.22759	0.146329			0.83467
PF3D7_1106300	A0A143ZZN7	PF3D7_1106300	513.613	-1.22166	0.146329			0.83467
PF3D7_1301800	PF3D7_1301800	PF3D7_1301800	412.529	5.44986	0.146329			0.83467
PF3D7_1402200	Q8IM67	PF3D7_1402200	235.47	-1.21922	0.146329			0.83467
PF3D7_1123500	Q8IIC8	PF3D7_1123500	806.841	1.12097	0.146329			0.83467
PF3D7_1231000	A0A144A0B4	PF3D7_1231000	191.548	-1.32453	0.146329			0.83467
PF3D7_1211200	Q8I5T8	PF3D7_1211200	784.013	1.0206	0.146329			0.83467
PF3D7_0516000	Q8I3U8	PF3D7_0516000	248.484	-1.10041	0.146329			0.83467
PF3D7_1408500	Q8IM11	PF3D7_1408500	596.371	1.04316	0.146329			0.83467
PF3D7_0924300	C0H556	PF3D7_0924300	82.6566	-1.43692	0.146329			0.83467
PF3D7_1343100	Q8IDQ8	PF3D7_1343100	70.0684	-1.62715	0.146329			0.83467
PF3D7_0202800	C6S3A7	PF3D7_0202800	52.2454	-1.93251	0.146329			0.83467
PF3D7_0305800	O97242	PF3D7_0305800	73.5987	-1.26009	0.146329			0.83467
PF3D7_0728200	Q8IBH5	PF3D7_0728200	39.884	-1.90198	0.146329			0.83467
PF3D7_MIT01100	PF3D7_MIT01100	PF3D7_MIT01100	57.753	-1.94404	0.146329			0.83467
PF3D7_1335100	Q8IDX8	PF3D7_1335100	456.01	-1.65314	0.146425			0.834385
PF3D7_0203900	O96139	PF3D7_0203900	101.745	-1.38984	0.146425			0.834385
PF3D7_1439400	Q8IL75	PF3D7_1439400	206.481	-1.5135	0.14647			0.834251
PF3D7_1475300	Q8IK85	PF3D7_1475300	93.9645	-1.3346	0.14652			0.834103
PF3D7_1435900	Q8ILA5	PF3D7_1435900	37.8574	-1.57897	0.14652			0.834103
PF3D7_0917800	Q8I2X5	PF3D7_0917800	36.7114	1.5166	0.14652			0.834103
PF3D7_0904700	Q8I3A2	PF3D7_0904700	32.4862	-1.79675	0.14701			0.832653
PF3D7_0624200	C6KT78	PF3D7_0624200	211.215	-1.40697	0.147866			0.830132
PF3D7_0821600	Q8IB50	PF3D7_0821600	676.882	1.15554	0.148247			0.829014
PF3D7_1224900	Q8I5G8	PF3D7_1224900	238.516	1.09418	0.148247			0.829014
PF3D7_0718400	Q8IBR7	PF3D7_0718400	285.757	-1.20912	0.148281			0.828914
PF3D7_1336700	Q8IDW5	PF3D7_1336700	927.654	1.04135	0.148281			0.828914
PF3D7_0623800	C6KT74	PF3D7_0623800	9136.34	1.16401	0.148376			0.828636
PFF0380w	C6KSS5	PF3D7_0607700	190.521	-1.85085	0.148376			0.828636
PF3D7_0424300	PF3D7_0424300	PF3D7_0424300	255.049	-1.37574	0.148376			0.828636
PF3D7_1028800	Q8IJB6	PF3D7_1028800	55.1141	-1.92045	0.148971			0.826898
PF3D7_0909700	Q8I355	PF3D7_0909700	902.471	1.08597	0.149028			0.826732
PF3D7_0934800	Q7K6A0	PF3D7_0934800	185.74	-1.45213	0.149028			0.826732
PF3D7_1224700	Q8I5H0	PF3D7_1224700	387.465	1.04478	0.149028			0.826732
PF3D7_0304100	O97229	PF3D7_0304100	36.6651	-2.06554	0.149028			0.826732
PF3D7_0620400	C6KT44	PF3D7_0620400	20.0643	-2.3341	0.149028			0.826732
PF3D7_1134700	Q8II17	PF3D7_1134700	2639.97	1.09111	0.149247			0.826094
PF3D7_0412000	Q9U0H0	PF3D7_0412000	256.261	-1.29974	0.149247			0.826094
PF3D7_0527900	A0A5K1K8X8	PF3D7_0527900	957.512	1.03037	0.149247			0.826094
PF3D7_1138000	Q8IHY4	PF3D7_1138000	99.3542	-1.85783	0.149247			0.826094
PF3D7_1204400	Q8I601	PF3D7_1204400	85.2704	-1.30822	0.149247			0.826094
PF3D7_1225000	Q8I5G7	PF3D7_1225000	43.4841	-1.3987	0.149247			0.826094
PF3D7_0529300	Q8I3H4	PF3D7_0529300	34.3182	-1.4885	0.149247			0.826094
PF3D7_1404800	A0A144A3F9	PF3D7_1404800	5097.65	1.20178	0.14948			0.825417
PF3D7_0207500	Q9TY96	PF3D7_0207500	752.901	-1.7004	0.14948			0.825417
PF3D7_0903300	C0H517	PF3D7_0903300	600.005	-1.65017	0.14948			0.825417
PF3D7_0526200	PF3D7_0526200	PF3D7_0526200	215.807	-1.16134	0.14948			0.825417
PF3D7_1238600	Q8I537	PF3D7_1238600	89.8969	-1.69255	0.14948			0.825417
PF3D7_1410700	Q8ILY8	PF3D7_1410700	100.825	-1.54834	0.14948			0.825417
PF3D7_1339400	A0A5K1K8V5	PF3D7_1339400	62.647	-1.379	0.14948			0.825417
PF3D7_0626500	C6KTA1	PF3D7_0626500	16.2147	-2.1823	0.14948			0.825417
PF3D7_1116800	Q8IIJ8	PF3D7_1116800	4096.88	1.15385	0.149503			0.82535
PF3D7_1332200	A0A5K1K8U2	PF3D7_1332200	50.0987	-1.94503	0.149503			0.82535
PF3D7_1112500	Q8IIN8	PF3D7_1112500	183.18	1.25793	0.149503			0.82535
PF3D7_0823200	Q8IB66	PF3D7_0823200	2875.41	0.984826	0.14959			0.825097
PF3D7_1014700	Q8IJP8	PF3D7_1014700	355.367	-1.21677	0.14959			0.825097
PF3D7_0503600	Q8I465	PF3D7_0503600	196.581	-1.50609	0.14959			0.825097
PF3D7_0505400	Q8I448	PF3D7_0505400	156.166	-1.57814	0.14959			0.825097
PF3D7_0508600	A0A5K1K8H8	PF3D7_0508600	357.937	1.06815	0.14959			0.825097
PF3D7_0607900	C6KSS7	PF3D7_0607900	171.693	-1.16935	0.150077			0.823686
PF3D7_0523600	A0A5K1K8Q3	PF3D7_0523600	80.3248	-1.44052	0.150093			0.82364
PF3D7_1406200	Q8IM32	PF3D7_1406200	13266.1	1.02435	0.150233			0.823235
PF3D7_MIT01700	PF3D7_MIT01700	PF3D7_MIT01700	49.7725	-1.74263	0.150528			0.822383
PF3D7_0905900	Q8I390	PF3D7_0905900	537.266	1.1608	0.150845			0.821469
PF3D7_0205700	PF3D7_0205700	PF3D7_0205700	615.138	1.01963	0.15116			0.820563
PF3D7_MIT03900	PF3D7_MIT03900	PF3D7_MIT03900	40.229	-1.73489	0.151233			0.820353
PF3D7_0826000	Q8IB93	PF3D7_0826000	145.842	-1.36627	0.151264			0.820264
PF3D7_1302000	Q8IEI6	PF3D7_1302000	1909.62	4.95551	0.151415			0.819831
PF3D7_1457300	Q8IKQ7	PF3D7_1457300	2926.6	1.04913	0.151415			0.819831
PF3D7_1252400	PF3D7_1252400	PF3D7_1252400	389.373	-1.54869	0.151415			0.819831
PF3D7_1212500	Q8I5S7	PF3D7_1212500	1224.85	1.02352	0.151415			0.819831
PF3D7_1028400	Q8IJC0	PF3D7_1028400	1171.96	1.07631	0.151415			0.819831
PF3D7_1142400	Q8IHU1	PF3D7_1142400	916.639	1.0088	0.151415			0.819831
PF3D7_0603000	C6KSN0	PF3D7_0603000	618.664	1.02052	0.151415			0.819831
PF3D7_0909900	Q8I353	PF3D7_0909900	783.177	0.952877	0.151415			0.819831
PF3D7_0423500	Q8IFN1	PF3D7_0423500	88.2607	-1.85284	0.151415			0.819831
PF3D7_1347600	C0H5H7	PF3D7_1347600	29.6124	-1.81967	0.151415			0.819831
PF3D7_0922900	Q8I2S7	PF3D7_0922900	25.2132	-1.76795	0.151415			0.819831
PF3D7_0706500	C0H4L6	PF3D7_0706500	9298.92	1.03562	0.151522			0.819524
PF3D7_0722600	Q8IBM7	PF3D7_0722600	2200.85	1.00495	0.151522			0.819524
PF3D7_1323900	A0A5K1K8R6	PF3D7_1323900	1506.86	1.03693	0.151522			0.819524
PF3D7_0827600	Q8IBA8	PF3D7_0827600	386.437	-1.23712	0.151522			0.819524
PF3D7_1364800	Q8ID59	PF3D7_1364800	1292.23	1.0029	0.151522			0.819524
PF3D7_1470800	Q8IKD0	PF3D7_1470800	144.938	-1.28654	0.151522			0.819524
PF3D7_0210300	O96186	PF3D7_0210300	135.857	-1.27056	0.151522			0.819524
PF3D7_1324600	Q8IE71	PF3D7_1324600	76.7953	-1.5491	0.151522			0.819524
PF3D7_MIT01000	PF3D7_MIT01000	PF3D7_MIT01000	76.739	-1.77279	0.151522			0.819524
PF3D7_1228100	Q8I5D7	PF3D7_1228100	62.6078	-1.54298	0.151522			0.819524
PF3D7_0624900	C6KT85	PF3D7_0624900	39.792	-1.8622	0.151522			0.819524
PF3D7_0112800	Q9U0N3	PF3D7_0112800	74.5479	1.47189	0.151522			0.819524
PF3D7_0830200	PF3D7_0830200	PF3D7_0830200	17.3776	-2.0501	0.151522			0.819524
PF3D7_1346300	Q8IDN4	PF3D7_1346300	6654.21	0.989365	0.151663			0.81912
PF3D7_0508900	Q8I414	PF3D7_0508900	872.999	-1.6236	0.151663			0.81912
PF3D7_1423000	Q8ILM2	PF3D7_1423000	1842.94	1.01177	0.151663			0.81912
PF3D7_1367400	Q8ID34	PF3D7_1367400	923.25	1.08517	0.151663			0.81912
PF3D7_1334300	Q8IDY5	PF3D7_1334300	370.254	-1.13896	0.151663			0.81912
PF3D7_0214700	O96227	PF3D7_0214700	76.0475	-1.6339	0.151663			0.81912
PF3D7_1129300	Q8II70	PF3D7_1129300	53.0178	-1.64797	0.151663			0.81912
PF3D7_1242400	Q8I505	PF3D7_1242400	15.7935	-2.18803	0.151663			0.81912
PF3D7_1142300	Q8IHU2	PF3D7_1142300	330.934	-1.18935	0.151668			0.819106
PF3D7_0321800	O97292	PF3D7_0321800	2008.17	0.955531	0.151996			0.818168
PF3D7_0832700	PF3D7_0832700	PF3D7_0832700	5.59895	3.45936	0.151996			0.818168
PF3D7_1457700	Q8IKQ3	PF3D7_1457700	2513.67	1.08995	0.152077			0.817936
PF3D7_1443500	Q8IL36	PF3D7_1443500	203.236	-1.29772	0.15209			0.817899
PF3D7_0321700	O97291	PF3D7_0321700	413.407	-1.19	0.152121			0.817811
PF3D7_0110600	Q8I239	PF3D7_0110600	2361.44	1.07332	0.152185			0.817628
PF3D7_1437200	Q8IL94	PF3D7_1437200	731.257	-1.19534	0.152185			0.817628
PF3D7_0903200	C0H516	PF3D7_0903200	1030.86	-0.999873	0.152185			0.817628
PFC0810c	O77374	PF3D7_0318300	423.291	1.04023	0.152185			0.817628
PF3D7_0209500	O96179	PF3D7_0209500	25.609	-2.38008	0.152185			0.817628
PF3D7_1433700	Q8ILC6	PF3D7_1433700	188.094	-1.24243	0.152287			0.817337
PF3D7_0924700	Q8I2R0	PF3D7_0924700	794.26	1.03101	0.15281			0.815848
PF3D7_0713400	Q8IBW3	PF3D7_0713400	609.263	1.04259	0.153347			0.814325
PF3D7_1232600	Q8I596	PF3D7_1232600	41.2324	-1.44561	0.153637			0.813504
PF3D7_1447100	Q8IL01	PF3D7_1447100	795.109	0.978203	0.153807			0.813024
PF3D7_0729600	PF3D7_0729600	PF3D7_0729600	105.108	-1.38153	0.153807			0.813024
PF3D7_0403200	Q8I1Z8	PF3D7_0403200	5996.45	0.932065	0.154118			0.812147
PF3D7_0612900	C6KSX2	PF3D7_0612900	4321.47	0.995141	0.154118			0.812147
PF3D7_1217200	A0A144A1F1	PF3D7_1217200	3144.09	1.05937	0.154118			0.812147
PF3D7_1408200	Q8IM14	PF3D7_1408200	1913.83	1.11891	0.154118			0.812147
PF3D7_0312400	O77344	PF3D7_0312400	680.717	-1.33476	0.154118			0.812147
PF3D7_1464000	Q8IKJ7	PF3D7_1464000	2065.43	0.942409	0.154118			0.812147
PF3D7_0107800	A0A143ZUM0	PF3D7_0107800	379.106	-1.07814	0.154118			0.812147
PF3D7_0313800	C0H472	PF3D7_0313800	218.18	-1.38859	0.154118			0.812147
PF3D7_1325800	A0A5K1K8C9	PF3D7_1325800	195.698	-1.25581	0.154118			0.812147
PF3D7_0508800	Q8I415	PF3D7_0508800	185.702	-1.12271	0.154118			0.812147
PF3D7_0623000	C6KT66	PF3D7_0623000	211.394	-1.09617	0.154118			0.812147
PF3D7_1231400	Q8I5A6	PF3D7_1231400	127.267	-1.28139	0.154118			0.812147
PF3D7_1337100	Q8IDW1	PF3D7_1337100	167.122	-1.18264	0.154118			0.812147
PF3D7_1202400	Q8I621	PF3D7_1202400	111.924	-1.36074	0.154118			0.812147
PF3D7_0928600	Q8I2M3	PF3D7_0928600	83.2609	-1.57932	0.154118			0.812147
PF3D7_1358600	A0A5K1K8I4	PF3D7_1358600	49.3607	-1.64644	0.154118			0.812147
PF3D7_1363800	A0A5K1K926	PF3D7_1363800	24.5402	-1.69696	0.154118			0.812147
PF3D7_0105900	Q8I282	PF3D7_0105900	26.8516	-1.71302	0.154118			0.812147
PF3D7_1037200	A0A144A1X7	PF3D7_1037200	13.6693	-2.22338	0.154118			0.812147
PF3D7_1411500	Q8ILY0	PF3D7_1411500	916.789	1.05422	0.154254			0.811764
PF3D7_0629900	C6KTD4	PF3D7_0629900	775.183	1.0599	0.155358			0.808666
PF3D7_0532900	Q8I3E7	PF3D7_0532900	5.72668	3.14754	0.155358			0.808666
PF3D7_0520600	C0H4F3	PF3D7_0520600	1521.67	1.06955	0.156084			0.806642
PF3D7_0106700	Q8I275	PF3D7_0106700	3384.62	0.991249	0.15633			0.805958
PF3D7_0716100	Q8IBT9	PF3D7_0716100	2555.54	1.0235	0.15633			0.805958
PF3D7_1244200	Q8I4Y8	PF3D7_1244200	702.802	1.01662	0.15633			0.805958
PF3D7_1441300	Q8IL57	PF3D7_1441300	94.6065	-1.6018	0.15633			0.805958
PF3D7_1239100	Q8I532	PF3D7_1239100	82.1648	-1.48818	0.15633			0.805958
PF3D7_0717000	A0A143ZVX7	PF3D7_0717000	60.1233	-1.5088	0.15633			0.805958
PF3D7_0629300	C6KTC8	PF3D7_0629300	46.2666	-1.71583	0.15633			0.805958
PF3D7_1341500	A0A5K1K8W3	PF3D7_1341500	21.3136	-2.11499	0.15633			0.805958
PF3D7_1409600	Q8ILZ9	PF3D7_1409600	99.1421	1.21369	0.15633			0.805958
PF3D7_0811300	C0H4T9	PF3D7_0811300	18430.9	1.02053	0.156507			0.805466
PF3D7_0723400	Q8IBL9	PF3D7_0723400	7380.33	1.00851	0.156507			0.805466
PF3D7_0214400	O96224	PF3D7_0214400	2695.08	1.03035	0.156507			0.805466
PF3D7_1239700	Q8I526	PF3D7_1239700	797.488	-1.1083	0.156507			0.805466
PF3D7_1345400	A0A5K1K9F6	PF3D7_1345400	626.225	-1.27291	0.156507			0.805466
PF3D7_1322200	A0A5K1K9E8	PF3D7_1322200	525.087	-1.29585	0.156507			0.805466
PF3D7_1456000	Q8IKR9	PF3D7_1456000	275.628	-1.57961	0.156507			0.805466
PF3D7_0319000	O77368	PF3D7_0319000	266.37	-1.53472	0.156507			0.805466
PF3D7_1459600	Q8IKN5	PF3D7_1459600	1124.46	0.942328	0.156507			0.805466
PF3D7_0724800	Q8IBK3	PF3D7_0724800	182.985	-1.44781	0.156507			0.805466
PF3D7_1471400	Q8IKC5	PF3D7_1471400	197.721	-1.39576	0.156507			0.805466
PF3D7_0503000	C0H4C3	PF3D7_0503000	206.959	-1.21172	0.156507			0.805466
PF3D7_1358200	C0H5I8	PF3D7_1358200	691.429	0.943914	0.156507			0.805466
PF3D7_0811000	Q8IAU5	PF3D7_0811000	128.15	-1.52865	0.156507			0.805466
PF3D7_1250400	Q8I4T0	PF3D7_1250400	69.7112	-1.76222	0.156507			0.805466
PF3D7_1326000	A0A5K1K9E9	PF3D7_1326000	111.548	-1.29262	0.156507			0.805466
PF3D7_1117400	Q8IIJ3	PF3D7_1117400	149.626	-1.03229	0.156507			0.805466
PF3D7_1126900	Q8II94	PF3D7_1126900	448.314	1.0054	0.156507			0.805466
PF3D7_1347300	A0A5K1K8X9	PF3D7_1347300	107.541	-1.14495	0.156507			0.805466
PF3D7_0715300	A0A143ZZT8	PF3D7_0715300	50.0868	-1.85701	0.156507			0.805466
PF3D7_0605600	C6KSQ4	PF3D7_0605600	37.4991	-1.67156	0.156507			0.805466
PF3D7_1209500	PF3D7_1209500	PF3D7_1209500	32.3002	-1.70328	0.156507			0.805466
PF3D7_0625600	C6KT92	PF3D7_0625600	71.5085	1.42554	0.156507			0.805466
PF3D7_0504100	Q8I460	PF3D7_0504100	34.0472	-1.48752	0.156507			0.805466
PF3D7_1226900	Q8I5E9	PF3D7_1226900	26.8803	-1.51856	0.156507			0.805466
PF3D7_1244300	PF3D7_1244300	PF3D7_1244300	41.3983	1.46381	0.156507			0.805466
PF3D7_1348000	A0A5K1K8E9	PF3D7_1348000	19.3814	-2.20179	0.157109			0.803799
PF3D7_0604700	C6KSP5	PF3D7_0604700	170.774	-1.41316	0.157116			0.80378
PF3D7_1145600	A0A143ZYV4	PF3D7_1145600	47.0904	-1.6681	0.157121			0.803766
PF3D7_1345200	A0A5K1K8X1	PF3D7_1345200	146.478	-1.07746	0.157263			0.803373
PF3D7_1427000	Q8ILJ4	PF3D7_1427000	185.564	-1.30813	0.157575			0.802513
PF3D7_1343900	C0H5G7	PF3D7_1343900	350.394	1.0103	0.157575			0.802513
PF3D7_1332700	Q8IE01	PF3D7_1332700	1160.59	0.997065	0.157716			0.802124
PF3D7_1405800	Q8IM36	PF3D7_1405800	4836.69	0.996561	0.157911			0.801588
PF3D7_1110700	A0A143ZXR3	PF3D7_1110700	67.1105	-1.56166	0.159207			0.798038
PF3D7_1423600	Q8ILL6	PF3D7_1423600	300.702	-1.18425	0.159222			0.797997
PF3D7_1449700	Q8IKX8	PF3D7_1449700	406.375	1.11505	0.159222			0.797997
PF3D7_1132300	Q8II42	PF3D7_1132300	180.228	-1.07007	0.159222			0.797997
PF3D7_0205400	O96149	PF3D7_0205400	357.947	1.04678	0.159222			0.797997
PF3D7_1420200	Q8ILP8	PF3D7_1420200	69.5791	-1.27548	0.159222			0.797997
PF3D7_1437300	Q8IL93	PF3D7_1437300	43.6668	-1.7161	0.159222			0.797997
PF3D7_0531200	Q8I3F6	PF3D7_0531200	14.8932	-2.19797	0.159222			0.797997
PF3D7_0415400	Q8I1T3	PF3D7_0415400	689.38	0.931928	0.159251			0.797918
PF3D7_1214400	Q8I5R2	PF3D7_1214400	168.621	1.09101	0.159251			0.797918
PF3D7_0632800	C6KTF9	PF3D7_0632800	881.706	5.65545	0.159475			0.797307
PF3D7_1226700	Q8I5F1	PF3D7_1226700	1109.47	1.04065	0.159475			0.797307
PF3D7_0623700	C6KT73	PF3D7_0623700	128.468	-1.06618	0.159475			0.797307
PF3D7_0500900	Q8I491	PF3D7_0500900	34.0681	-1.45743	0.159475			0.797307
PF3D7_1321800	Q8IE98	PF3D7_1321800	969.004	1.00515	0.159568			0.797054
PF3D7_1348500	Q8IDL4	PF3D7_1348500	124.592	-1.57176	0.159568			0.797054
PF3D7_0528700	Q8I3I0	PF3D7_0528700	450.992	0.977635	0.159735			0.7966
PF3D7_0911600	C0H534	PF3D7_0911600	64.9153	-1.59676	0.159735			0.7966
PF3D7_MIT00900	PF3D7_MIT00900	PF3D7_MIT00900	72.8478	-1.43301	0.159895			0.796165
PF3D7_0932400	Q8I2J2	PF3D7_0932400	108.144	-1.57048	0.160338			0.794964
PF3D7_1440400	Q8IL66	PF3D7_1440400	62.9073	-1.84376	0.160338			0.794964
PF3D7_1006600	Q8IJX5	PF3D7_1006600	260.594	-1.03259	0.160348			0.794936
PF3D7_1333600	Q8IDZ2	PF3D7_1333600	2053.59	1.015	0.160518			0.794476
PF3D7_0109950	A0A143ZXB9	PF3D7_0109950	73.1085	-1.37641	0.160518			0.794476
PF3D7_1448900	C6S3J0	PF3D7_1448900	21.7446	-1.74799	0.160518			0.794476
PF3D7_1144600	Q8IHS1	PF3D7_1144600	573.06	1.0044	0.16057			0.794336
PF3D7_1348200	Q8IDL7	PF3D7_1348200	228.168	1.01092	0.16057			0.794336
PF3D7_0902800	Q8I3C0	PF3D7_0902800	455.551	-1.31928	0.160775			0.793781
PF3D7_0824900	Q8IB83	PF3D7_0824900	1008.52	0.996714	0.160775			0.793781
PF3D7_0418600	Q8I1Q1	PF3D7_0418600	96.1021	-1.68354	0.160775			0.793781
PF3D7_1433600	Q8ILC7	PF3D7_1433600	76.2996	-1.39964	0.160853			0.793571
PF3D7_1417200	Q8ILS4	PF3D7_1417200	5972.92	1.01733	0.160945			0.793323
PF3D7_1230800	Q8I5B2	PF3D7_1230800	3334.33	0.999134	0.160945			0.793323
PF3D7_0833500	A0A143ZZY8	PF3D7_0833500	440.153	5.30232	0.160945			0.793323
PF3D7_0524900	Q8I3L6	PF3D7_0524900	1116.35	1.02065	0.160945			0.793323
PF3D7_0926500	Q8I2P4	PF3D7_0926500	218.739	-1.40147	0.160945			0.793323
PFB0145c	O96133	PF3D7_0203000	250.968	-1.3581	0.160945			0.793323
PF3D7_1239800	Q8I525	PF3D7_1239800	199.19	-1.11441	0.160945			0.793323
PF3D7_1245300	Q8I4X8	PF3D7_1245300	54.8455	-1.37335	0.160945			0.793323
PF3D7_0704300	A0A143ZVW7	PF3D7_0704300	739.432	-1.39841	0.161008			0.793153
PF3D7_0111500	Q8I231	PF3D7_0111500	306.326	-1.33591	0.161008			0.793153
PF3D7_1216400	Q8I5P3	PF3D7_1216400	787.072	1.04753	0.161008			0.793153
PF3D7_1116600	Q8IIK0	PF3D7_1116600	289.299	-1.12906	0.161008			0.793153
PF3D7_0303300	O77315	PF3D7_0303300	686.557	0.999811	0.161008			0.793153
PF3D7_1466800	Q8IKG9	PF3D7_1466800	557.521	1.01308	0.161008			0.793153
PF3D7_0614100	C0H4H5	PF3D7_0614100	68.9181	-1.61127	0.161008			0.793153
PF3D7_0618500	C6KT25	PF3D7_0618500	52.7512	-1.43332	0.161008			0.793153
PF3D7_1340300	Q8IDT3	PF3D7_1340300	5653.05	0.98857	0.161019			0.793123
PF3D7_0606600	C6KSR4	PF3D7_0606600	3499.29	1.00458	0.161322			0.792306
PF3D7_1349200	Q8IDK7	PF3D7_1349200	3000.44	0.964092	0.161559			0.791669
PF3D7_1212900	Q8I5S4	PF3D7_1212900	1607.21	0.972035	0.161726			0.79122
PF3D7_1217700	Q8I5N1	PF3D7_1217700	704.971	0.949916	0.161726			0.79122
PF3D7_1307500	Q8IEP0	PF3D7_1307500	40.9628	-1.75769	0.161726			0.79122
PF3D7_0507900	C0H4D1	PF3D7_0507900	149.973	1.08795	0.161726			0.79122
PF3D7_0917600	Q8I2X7	PF3D7_0917600	1399.41	1.00865	0.162213			0.789914
PF3D7_1007100	C6S3C4	PF3D7_1007100	7.88576	-3.06493	0.162213			0.789914
PF3D7_0831300	C0H4Z6	PF3D7_0831300	327.551	-1.19492	0.162392			0.789435
PF3D7_1230500	Q8I5B5	PF3D7_1230500	243.972	1.20152	0.162712			0.78858
PF3D7_1328300	Q8IE43	PF3D7_1328300	581.143	-1.04784	0.162807			0.788327
PF3D7_0615900	A0A5K1K895	PF3D7_0615900	699.932	-1.1004	0.162807			0.788327
PF3D7_0603800	C6KSN6	PF3D7_0603800	214.046	-1.42305	0.162807			0.788327
PF3D7_1314700	Q8IEG8	PF3D7_1314700	289.268	-1.18421	0.162807			0.788327
PF3D7_1415300	Q8ILU3	PF3D7_1415300	165.487	-1.2241	0.162807			0.788327
PF3D7_1120700	Q8IIG0	PF3D7_1120700	70.5899	-1.24116	0.162807			0.788327
PF3D7_1419700	Q8ILQ3	PF3D7_1419700	6506.97	1.00535	0.163228			0.787205
PF3D7_0831500	A0A143ZW02	PF3D7_0831500	3258.5	1.02546	0.163228			0.787205
PF3D7_0622200	C6KT59	PF3D7_0622200	1750.33	1.0882	0.163228			0.787205
PF3D7_1317200	Q8IEE4	PF3D7_1317200	597.061	-1.13086	0.163228			0.787205
PF3D7_0824800	Q8IB82	PF3D7_0824800	1557.78	0.965049	0.163228			0.787205
PF3D7_0925800	Q8I2Q1	PF3D7_0925800	479.169	-0.932521	0.163228			0.787205
PF3D7_1146600	Q8IHQ2	PF3D7_1146600	238.835	-1.16468	0.163228			0.787205
PF3D7_0214800	O96228	PF3D7_0214800	761.772	1.103	0.163228			0.787205
PF3D7_0303700	O97227	PF3D7_0303700	260.716	-1.32045	0.163228			0.787205
PF3D7_0320700	Q9NFA0	PF3D7_0320700	243.684	-1.35702	0.163228			0.787205
PF3D7_0714300	Q8IBV4	PF3D7_0714300	795.297	0.938648	0.163228			0.787205
PF3D7_0822800	C0H4X1	PF3D7_0822800	296.041	1.14652	0.163228			0.787205
PF3D7_1225400	Q8I5G3	PF3D7_1225400	351.742	1.03734	0.163228			0.787205
CPK2	Q8ICR0	PF3D7_0610600	130.433	-1.04167	0.163228			0.787205
PF3D7_0602900	C6KSM9	PF3D7_0602900	225.258	1.04691	0.163228			0.787205
PF3D7_1342200	A0A5K1K8X3	PF3D7_1342200	46.4503	-1.63632	0.163228			0.787205
PF3D7_1033500	Q8IJ73	PF3D7_1033500	445.841	0.994626	0.163285			0.787054
PF3D7_1124800	Q8IIB5	PF3D7_1124800	2417.86	1.01001	0.16379			0.785713
PF3D7_0306400	O97245	PF3D7_0306400	219.003	-1.38483	0.16379			0.785713
PF3D7_0101300	B9ZSH7	PF3D7_0101300	5.36933	3.38544	0.16379			0.785713
PF3D7_1205600	Q8I5Y9	PF3D7_1205600	1370.33	-1.25383	0.163877			0.785482
PF3D7_1028300	Q8IJC1	PF3D7_1028300	848.072	1.10434	0.163979			0.785212
PF3D7_0210400	C6S3B5	PF3D7_0210400	81.9714	-1.38017	0.16409			0.784918
PF3D7_0419400	Q8I1P3	PF3D7_0419400	90.3357	-1.68731	0.164282			0.78441
PF3D7_1438000	Q8IL87	PF3D7_1438000	4534.42	0.988367	0.164403			0.78409
PF3D7_1137300	Q8IHZ2	PF3D7_1137300	1442.96	0.981312	0.164403			0.78409
PF3D7_1326500	A0A5K1K847	PF3D7_1326500	105.336	-1.2887	0.164403			0.78409
PF3D7_1476400	PF3D7_1476400	PF3D7_1476400	224.372	1.04144	0.164403			0.78409
PF3D7_1017600	Q8IJM3	PF3D7_1017600	8787.62	0.892417	0.164658			0.783417
PF3D7_1330200	A0A5K1K8U3	PF3D7_1330200	145.029	-1.11383	0.164688			0.783338
PF3D7_0417500	PF3D7_0417500	PF3D7_0417500	256.837	-1.41079	0.164711			0.783277
PF3D7_1226800	Q8I5F0	PF3D7_1226800	133.655	-1.10417	0.164711			0.783277
PF3D7_1227700	Q8I5E1	PF3D7_1227700	1172.83	0.892528	0.164859			0.782887
PF3D7_1348300	Q8IDL6	PF3D7_1348300	491.859	1.10686	0.164859			0.782887
PF3D7_0526000	Q8I3K5	PF3D7_0526000	58.7946	-1.18714	0.164869			0.782861
PF3D7_1220100	Q8I5L1	PF3D7_1220100	727.568	0.931133	0.164935			0.782687
PF3D7_0907000	C0H523	PF3D7_0907000	197.698	1.25767	0.164935			0.782687
PF3D7_1322000	Q8IE96	PF3D7_1322000	224.352	-1.44636	0.165227			0.781919
PF3D7_1403600	Q8IM58	PF3D7_1403600	78.0731	-1.69123	0.165227			0.781919
PF3D7_1338000	C0H5F8	PF3D7_1338000	138.824	-1.02814	0.165227			0.781919
PF3D7_1110800	C6S3E9	PF3D7_1110800	29.4524	-1.50594	0.165227			0.781919
PF3D7_1477400	Q8IK61	PF3D7_1477400	29.3346	1.63792	0.165227			0.781919
PF3D7_MIT02100	PF3D7_MIT02100	PF3D7_MIT02100	600.526	-1.04128	0.16526			0.781832
PF3D7_1324200	Q8IE75	PF3D7_1324200	2200.79	0.957324	0.16526			0.781832
PF3D7_1249400	Q8I4U0	PF3D7_1249400	68.9106	-1.2741	0.16526			0.781832
PF3D7_0408700	Q9U0J9	PF3D7_0408700	11.6314	-2.39509	0.16526			0.781832
PF3D7_1360500	Q8IDA0	PF3D7_1360500	156.144	-1.1305	0.165323			0.781667
PF3D7_0106000	B9ZSI3	PF3D7_0106000	94.8708	-1.39513	0.165323			0.781667
PF3D7_0607200	C6KSS0	PF3D7_0607200	66.4767	-1.42069	0.165323			0.781667
PF3D7_1222600	Q8I5I9	PF3D7_1222600	52.6488	1.20044	0.165431			0.781383
PF3D7_1213400	Q8I5S1	PF3D7_1213400	10.1599	-2.35913	0.165508			0.781181
PF3D7_1133100	Q8II33	PF3D7_1133100	2267.53	0.943194	0.16598			0.779944
PF3D7_1225500	Q8I5G2	PF3D7_1225500	721.867	0.985964	0.16598			0.779944
PF3D7_1310600	Q76NM7	PF3D7_1310600	172.5	-0.995953	0.16612			0.779578
PF3D7_1415100	Q8ILU5	PF3D7_1415100	26.3861	-1.47942	0.16612			0.779578
PF3D7_0923900	Q8I2R8	PF3D7_0923900	1985.58	0.960724	0.166672			0.778137
PF3D7_1110200	Q8IIR0	PF3D7_1110200	3132.17	0.890597	0.166854			0.777663
PF3D7_1333200	Q8IDZ6	PF3D7_1333200	394.499	-1.03424	0.167317			0.77646
PF3D7_1321700	Q8IE99	PF3D7_1321700	6133.87	0.907796	0.167338			0.776405
PF3D7_0525600	A0A5K1K9E4	PF3D7_0525600	158.382	-1.25192	0.167578			0.775783
PF3D7_0206900	PF3D7_0206900	PF3D7_0206900	94.6796	-1.29195	0.168178			0.774231
PF3D7_1128700	Q8II76	PF3D7_1128700	33.4901	-1.70717	0.168178			0.774231
PF3D7_1039600	PF3D7_1039600	PF3D7_1039600	102.186	4.57785	0.168481			0.773449
PF3D7_1451900	Q8IKV7	PF3D7_1451900	1733.1	1.01271	0.169002			0.772108
PF3D7_1206600	Q8I5X9	PF3D7_1206600	3366.38	0.991677	0.169686			0.770354
PF3D7_1434800	Q8ILB6	PF3D7_1434800	743.862	-1.09442	0.169686			0.770354
PF3D7_1219700	Q7KQK1	PF3D7_1219700	28.519	-1.62983	0.169686			0.770354
PF3D7_1234700	Q8I575	PF3D7_1234700	49.0086	-1.36514	0.169904			0.769796
PF3D7_1030700	Q8IJ98	PF3D7_1030700	170.729	1.18648	0.170227			0.768972
PF3D7_1212700	Q8I5S6	PF3D7_1212700	34601.4	0.921706	0.170242			0.768933
PF3D7_0308900	O77327	PF3D7_0308900	1267.72	0.935428	0.170242			0.768933
PF3D7_0624500	C6KT81	PF3D7_0624500	145.688	-1.49696	0.170242			0.768933
PF3D7_1336200	Q8IDW9	PF3D7_1336200	533.87	-1.24653	0.170398			0.768536
PF3D7_0420000	Q8I1N9	PF3D7_0420000	7747.69	0.955297	0.170425			0.768467
PF3D7_0316300	PF3D7_0316300	PF3D7_0316300	602.164	-1.43413	0.170425			0.768467
PF3D7_0729400	Q8IBG5	PF3D7_0729400	1503.93	1.01937	0.170425			0.768467
PF3D7_1309500	Q8I700	PF3D7_1309500	637.982	1.05804	0.170425			0.768467
PF3D7_1415800	Q8ILT8	PF3D7_1415800	653.746	1.01043	0.170425			0.768467
PF3D7_1238700	A0A144A4I8	PF3D7_1238700	167.327	-1.29381	0.170425			0.768467
PF3D7_1409800	Q8ILZ7	PF3D7_1409800	164.782	-1.13982	0.170425			0.768467
PF3D7_1314200	Q8IEH2	PF3D7_1314200	157.948	-1.24751	0.170425			0.768467
PF3D7_0103000	B9ZSH9	PF3D7_0103000	66.7606	-1.50143	0.170425			0.768467
PF3D7_0916500	C0H540	PF3D7_0916500	129.102	-1.13311	0.170425			0.768467
PF3D7_1100500	Q8IIZ1	PF3D7_1100500	16.0353	2.1861	0.170425			0.768467
PF3D7_1350500	A0A5K1K8S2	PF3D7_1350500	820.096	1.00336	0.170452			0.768398
PF3D7_0918100	C0H542	PF3D7_0918100	2003	0.937046	0.170453			0.768395
PF3D7_0921800	C0H549	PF3D7_0921800	677.419	1.10821	0.171075			0.766813
PF3D7_1241100	Q8I518	PF3D7_1241100	707.406	0.944868	0.171075			0.766813
PF3D7_0105200	Q8I289	PF3D7_0105200	222.128	-1.06152	0.171075			0.766813
PF3D7_1306700	Q8IEP8	PF3D7_1306700	59.4778	-1.2832	0.17138			0.76604
PF3D7_1237900	Q8I544	PF3D7_1237900	2984.39	0.896895	0.17159			0.765508
PF3D7_1016900	Q8IJM9	PF3D7_1016900	410.533	-1.12818	0.171593			0.7655
PF3D7_0904800	Q8I3A1	PF3D7_0904800	409.56	-1.13026	0.171593			0.7655
PF3D7_1435300	Q8ILB1	PF3D7_1435300	201.403	-1.51134	0.171593			0.7655
PF3D7_1215000	Q8I5Q6	PF3D7_1215000	41.748	-1.54621	0.171788			0.765007
PF3D7_0815800	Q8IAZ5	PF3D7_0815800	1194.17	-0.903856	0.171804			0.764967
PF3D7_0617100	C6KT12	PF3D7_0617100	833.793	1.01107	0.17208			0.76427
PF3D7_0709600	C0H4M3	PF3D7_0709600	669.624	0.942549	0.17208			0.76427
PF3D7_0504200	Q8I459	PF3D7_0504200	67.6579	-1.54294	0.17255			0.763085
PF3D7_1225200	Q8I5G5	PF3D7_1225200	1069.28	0.95552	0.172611			0.762932
PF3D7_0521400	Q8I3P8	PF3D7_0521400	135.96	-1.14955	0.172611			0.762932
PF3D7_0518200	C0H4E7	PF3D7_0518200	88.548	-1.29211	0.172727			0.76264
PF3D7_1363000	A0A5K1K998	PF3D7_1363000	269.817	1.01039	0.172764			0.762547
PF3D7_1313000	Q8IEI4	PF3D7_1313000	101.592	-1.12101	0.172764			0.762547
PF3D7_0315800	O97273	PF3D7_0315800	615.803	0.96231	0.172899			0.762208
PFD0725c	Q8I1T8	PF3D7_0415000	280.755	1.19079	0.173112			0.761673
OAT	Q6LFH8	PF3D7_0608800	1620.55	-0.94102	0.173129			0.76163
PF3D7_1110500	Q8IIQ6	PF3D7_1110500	386.391	-1.02968	0.173129			0.76163
PF3D7_0811900	C0H4U1	PF3D7_0811900	239.168	-1.26131	0.173129			0.76163
PF3D7_0828900	Q8IBC0	PF3D7_0828900	101.765	-1.405	0.173129			0.76163
PF3D7_1015800	Q8IJN8	PF3D7_1015800	287.53	-1.36067	0.173239			0.761354
PF3D7_0826400	Q8IB97	PF3D7_0826400	40.7758	-1.52808	0.173239			0.761354
PF3D7_0320000	C0H480	PF3D7_0320000	212.227	-1.23836	0.173654			0.760315
PF3D7_1002900	Q8IK07	PF3D7_1002900	325.848	0.926164	0.17378			0.76
PF3D7_0216200	O96240	PF3D7_0216200	388.489	1.07682	0.173939			0.759603
PF3D7_1138400	Q8IHY1	PF3D7_1138400	159.04	-1.61395	0.173976			0.759511
PF3D7_0903700	Q6ZLZ9	PF3D7_0903700	255.55	-1.39693	0.174429			0.758381
PF3D7_1452400	Q8IKV2	PF3D7_1452400	1533.09	0.932503	0.17459			0.757981
PF3D7_1028500	Q8IJB9	PF3D7_1028500	988.387	0.926158	0.17459			0.757981
PF3D7_0909600	Q8I356	PF3D7_0909600	141.913	-1.40205	0.17459			0.757981
PF3D7_1127500	Q8II88	PF3D7_1127500	103.336	-1.27339	0.17459			0.757981
PF3D7_1024100	Q8IJG4	PF3D7_1024100	80.7151	-1.39981	0.17459			0.757981
PF3D7_1475200	Q8IK86	PF3D7_1475200	48.8524	-1.51648	0.17459			0.757981
PF3D7_0820800	Q8IB42	PF3D7_0820800	60.1081	-1.18073	0.17459			0.757981
PF3D7_MIT03500	PF3D7_MIT03500	PF3D7_MIT03500	32.6961	-1.87966	0.17459			0.757981
PF3D7_1116100	C6S3F2	PF3D7_1116100	519.229	-1.34952	0.174627			0.757889
PF3D7_0714600	Q8IBV1	PF3D7_0714600	1231.54	0.906558	0.174669			0.757784
PF3D7_0310400	O77361	PF3D7_0310400	566.252	-1.42468	0.174888			0.75724
PF3D7_0907600	Q8I375	PF3D7_0907600	462.04	0.949926	0.174888			0.75724
PF3D7_0931100	Q8I2K4	PF3D7_0931100	6536.24	0.962544	0.174943			0.757103
PF3D7_1108500	Q8IIR8	PF3D7_1108500	305.047	-1.24915	0.174943			0.757103
PF3D7_0602600	C6KSM6	PF3D7_0602600	1179.86	0.980031	0.174943			0.757103
PF3D7_0621900	C6KT56	PF3D7_0621900	1936.02	0.960808	0.175193			0.756483
PF3D7_1412900	PF3D7_1412900	PF3D7_1412900	900.451	0.948514	0.175193			0.756483
PF3D7_0211700	O96197	PF3D7_0211700	277.772	-1.12465	0.175242			0.756362
PF3D7_0503300	Q8I468	PF3D7_0503300	3086.82	0.868815	0.175326			0.756154
PF3D7_0310300	C0H469	PF3D7_0310300	2292.67	0.949654	0.175326			0.756154
PF3D7_1414800	Q8ILU8	PF3D7_1414800	945.345	1.01826	0.175326			0.756154
PF3D7_0304700	O97233	PF3D7_0304700	15.2217	-2.12677	0.175326			0.756154
PF13_0326	Q8ID92	PF3D7_1361400	11.1866	-2.35067	0.175326			0.756154
PF3D7_1407800	Q8IM16	PF3D7_1407800	3371.9	1.01451	0.175572			0.755545
PF3D7_0808300	Q8IAS1	PF3D7_0808300	916.792	0.934395	0.175572			0.755545
PF3D7_1015600	Q8IJN9	PF3D7_1015600	1112.79	-1.0701	0.175643			0.755369
PF3D7_1330400	PF3D7_1330400	PF3D7_1330400	798.504	0.958132	0.175994			0.754502
PF3D7_1434600	Q8ILB8	PF3D7_1434600	2356.03	0.970776	0.17609			0.754265
PF3D7_1203500	Q8I610	PF3D7_1203500	1369.57	0.872631	0.17609			0.754265
PF3D7_0825200	Q8IB86	PF3D7_0825200	32.9974	-1.48353	0.17609			0.754265
PF3D7_1108000	Q8IIS2	PF3D7_1108000	2519.69	0.923471	0.176223			0.753937
PF3D7_1307600	Q8IEN9	PF3D7_1307600	277.284	-1.00668	0.176223			0.753937
PF3D7_1214900	Q8I5Q7	PF3D7_1214900	147.678	-1.15527	0.176237			0.753903
PF3D7_1228000	Q8I5D8	PF3D7_1228000	71.5247	-1.35801	0.176942			0.752169
PF3D7_0529400	PF3D7_0529400	PF3D7_0529400	791.65	-1.02568	0.177115			0.751745
PF3D7_0529800	Q8I3H0	PF3D7_0529800	585.715	-1.21831	0.177115			0.751745
PF3D7_0927600	Q8I2N3	PF3D7_0927600	278.822	-1.34564	0.177115			0.751745
PF3D7_0623600	C6KT72	PF3D7_0623600	1241.29	0.874031	0.177115			0.751745
PF3D7_0105800	Q8I283	PF3D7_0105800	313.914	-1.37148	0.17725			0.751414
PF3D7_0805700	C0H4R8	PF3D7_0805700	99.0649	-1.5645	0.17725			0.751414
PF3D7_1423100	Q8ILM1	PF3D7_1423100	37.5112	-1.73047	0.17725			0.751414
PF3D7_1125600	C6S3G9	PF3D7_1125600	26.9293	-1.61939	0.17725			0.751414
PF3D7_0932500	Q8I2J1	PF3D7_0932500	40.5449	-1.68933	0.177277			0.751348
PF3D7_1445000	Q8IL23	PF3D7_1445000	49.2019	-1.32839	0.177277			0.751348
PF3D7_0930400	PF3D7_0930400	PF3D7_0930400	2449.13	0.905293	0.177582			0.750601
PF3D7_0409100	C0H4A0	PF3D7_0409100	1934.61	0.935631	0.177582			0.750601
PF3D7_0507500	Q8I0V0	PF3D7_0507500	165.489	-1.48415	0.177582			0.750601
PF3D7_1033700	Q8IJ72	PF3D7_1033700	993.041	0.943924	0.177582			0.750601
PF3D7_0619700	C6KT37	PF3D7_0619700	91.8443	-1.52293	0.177582			0.750601
PF3D7_1012100	Q8IJS4	PF3D7_1012100	128.108	-1.25681	0.177582			0.750601
PF3D7_1324700	C0H5D3	PF3D7_1324700	342.549	0.98639	0.177582			0.750601
PF3D7_1350200	Q8IDJ7	PF3D7_1350200	328.753	1.05611	0.177582			0.750601
PF3D7_0914200	Q8I310	PF3D7_0914200	366.281	0.970729	0.177582			0.750601
PF3D7_0933400	C0H588	PF3D7_0933400	22.5938	-1.68768	0.177582			0.750601
PF3D7_1136300	Q8II01	PF3D7_1136300	6000.07	0.963955	0.177849			0.749949
PF3D7_0419600	Q76NN6	PF3D7_0419600	6788.86	0.834377	0.177849			0.749949
PF3D7_0411900	Q9U0H1	PF3D7_0411900	489.734	-1.24563	0.177849			0.749949
PF3D7_1348400	A0A5K1K8R0	PF3D7_1348400	244.742	-1.21801	0.177849			0.749949
PF3D7_1406700	Q8IM27	PF3D7_1406700	112.933	-1.3089	0.177849			0.749949
PF3D7_1308500	Q8IEN0	PF3D7_1308500	51.7445	-1.21948	0.177849			0.749949
PF3D7_0215800	O96237	PF3D7_0215800	86.1701	-1.24906	0.177891			0.749846
PF3D7_1021700	Q8IJI6	PF3D7_1021700	2101.67	-0.959148	0.177942			0.749722
PF3D7_0703200	Q8IC38	PF3D7_0703200	489.842	-1.08093	0.177942			0.749722
PF3D7_0409200	Q9U0J4	PF3D7_0409200	1154.41	0.932451	0.177942			0.749722
PF3D7_1324100	Q8IE76	PF3D7_1324100	103.54	-1.2694	0.177942			0.749722
PF3D7_1209600	Q8I5V3	PF3D7_1209600	8.53431	-2.86908	0.177942			0.749722
PF3D7_0307300	O97251	PF3D7_0307300	4.64482	-3.59956	0.177942			0.749722
PF3D7_1409200	PF3D7_1409200	PF3D7_1409200	70.238	-1.70054	0.178165			0.749178
PF3D7_1218400	Q8I5M4	PF3D7_1218400	1763.05	0.947345	0.17832			0.7488
PF3D7_1462900	Q8IKK6	PF3D7_1462900	87.9316	1.26131	0.178633			0.748038
PF3D7_0212000	O96200	PF3D7_0212000	71.0396	-1.52084	0.178648			0.748002
PF3D7_1004200	Q8IJZ5	PF3D7_1004200	466.523	-1.04674	0.178887			0.747421
PF3D7_0202400	O96127	PF3D7_0202400	26659	-1.05201	0.178903			0.747382
PF3D7_1123100	Q8IID2	PF3D7_1123100	5993.69	0.960597	0.178903			0.747382
PF3D7_1123000	Q8IID3	PF3D7_1123000	4963.38	0.969582	0.178903			0.747382
PF3D7_0632600	PF3D7_0632600	PF3D7_0632600	907.228	5.35695	0.178903			0.747382
PF3D7_0921900	Q8I2T4	PF3D7_0921900	3673.58	0.896174	0.178903			0.747382
PF11_0090	Q8IIS5	PF3D7_1107700	1615.38	0.959367	0.178903			0.747382
PF3D7_1312600	Q8IEJ6	PF3D7_1312600	144.219	-1.67257	0.178903			0.747382
EIF6	Q8IE00	PF3D7_1332800	724.242	1.01198	0.178903			0.747382
PF3D7_1031200	Q8IJ93	PF3D7_1031200	127.673	-1.16762	0.178903			0.747382
PF3D7_1328000	A0A5K1K950	PF3D7_1328000	134.369	-1.28032	0.178903			0.747382
PF3D7_0618900	PF3D7_0618900	PF3D7_0618900	77.3754	-1.46058	0.178903			0.747382
PF3D7_1426600	Q8ILJ8	PF3D7_1426600	68.5337	-1.36113	0.178903			0.747382
PF3D7_1226100	Q8I5F6	PF3D7_1226100	69.1645	-1.40722	0.178903			0.747382
PF3D7_1245900	Q8I4X3	PF3D7_1245900	116.483	1.28159	0.178903			0.747382
PF3D7_0104900	PF3D7_0104900	PF3D7_0104900	70.9473	1.09181	0.178903			0.747382
PF3D7_1322800	A0A5K1K836	PF3D7_1322800	9.35813	-2.37143	0.178903			0.747382
PF3D7_1119000	Q8IIH7	PF3D7_1119000	390.715	-0.921053	0.179049			0.747028
PF3D7_1305100	Q8IER5	PF3D7_1305100	59.5853	-1.45834	0.179306			0.746405
PF3D7_1344200	C0H5H0	PF3D7_1344200	4999.55	0.893778	0.179465			0.74602
PF3D7_0936000	Q8I2G0	PF3D7_0936000	15868.9	1.0616	0.179548			0.745819
PF3D7_0527000	Q8I3J5	PF3D7_0527000	1288.4	-1.31757	0.179865			0.745053
PF3D7_1118500	Q8III3	PF3D7_1118500	4274.32	0.922156	0.179865			0.745053
PF3D7_0729300	Q8IBG6	PF3D7_0729300	1361.07	0.99446	0.179865			0.745053
PF3D7_1466700	Q8IKH0	PF3D7_1466700	349.766	1.00271	0.179865			0.745053
PF3D7_0902600	PF3D7_0902600	PF3D7_0902600	272.052	1.04283	0.179865			0.745053
PF3D7_1454500	Q8IKT4	PF3D7_1454500	384.403	1.05138	0.180073			0.744551
PF3D7_0607000	C6KSR8	PF3D7_0607000	21373.4	0.908492	0.18015			0.744366
PF3D7_1249600	A0A144A0U1	PF3D7_1249600	54.2271	-1.55145	0.18015			0.744366
PF3D7_0925500	C0H561	PF3D7_0925500	91.7578	-1.24894	0.18015			0.744366
PF3D7_1411200	Q8ILY3	PF3D7_1411200	1409.75	0.955427	0.180217			0.744204
PF3D7_0725000	Q8IBK1	PF3D7_0725000	400.522	-0.875418	0.180217			0.744204
PF3D7_1458800	Q8IKP3	PF3D7_1458800	229.657	1.00875	0.180362			0.743855
PF3D7_1315200	C0H5B5	PF3D7_1315200	50.0691	-1.24936	0.180788			0.74283
PF3D7_1367100	Q8ID37	PF3D7_1367100	828.294	0.933308	0.18097			0.742393
PF3D7_1236700	Q8I556	PF3D7_1236700	186.314	-1.13938	0.181132			0.742005
PF3D7_0422900	Q8IFN7	PF3D7_0422900	18.528	-1.63953	0.181132			0.742005
PF3D7_0929200	C0H570	PF3D7_0929200	2862.38	0.864983	0.181175			0.741902
PF3D7_0104300	Q8I296	PF3D7_0104300	9824.18	0.955486	0.181557			0.740987
PF3D7_0926100	Q8I2P8	PF3D7_0926100	7202.06	0.987743	0.181557			0.740987
PF3D7_1456900	Q8IKR0	PF3D7_1456900	561.325	0.967031	0.181557			0.740987
PF3D7_0715800	Q8IBU2	PF3D7_0715800	130.453	-1.2218	0.181557			0.740987
PF3D7_0605000	C6KSP8	PF3D7_0605000	53.3416	-1.17466	0.181557			0.740987
PF3D7_0607300	C6KSS1	PF3D7_0607300	30.7564	-1.44094	0.181557			0.740987
PF3D7_1316200	Q8IEF2	PF3D7_1316200	26.6674	-1.4076	0.181557			0.740987
PF3D7_0705000	Q8IC20	PF3D7_0705000	2688.17	0.894037	0.181731			0.740571
PF3D7_1126500	Q8II99	PF3D7_1126500	1898.92	0.980491	0.181731			0.740571
PF3D7_0104400	Q8I295	PF3D7_0104400	248.425	-0.988069	0.181731			0.740571
PF10_0084	Q7KQL5	PF3D7_1008700	621.716	-1.29513	0.182192			0.739471
PF3D7_0319900	O97279	PF3D7_0319900	58.9421	1.26165	0.182467			0.738816
PF3D7_1020700	Q8IJJ5	PF3D7_1020700	1781.38	1.04832	0.18253			0.738666
PF3D7_0627800	C6KTB4	PF3D7_0627800	888.999	0.950953	0.18253			0.738666
PF3D7_1218100	A0A144A3X6	PF3D7_1218100	5.21451	-3.78348	0.182547			0.738625
PF3D7_0728600	Q8IBH2	PF3D7_0728600	586.737	-1.32234	0.182847			0.737912
PF3D7_0602100	C6KSM1	PF3D7_0602100	2040.25	0.894424	0.182964			0.737634
PF3D7_1412000	Q8ILX4	PF3D7_1412000	18.839	-1.68826	0.183145			0.737205
PF3D7_1357700	A0A5K1K903	PF3D7_1357700	1900.6	1.02567	0.184062			0.735036
PF3D7_1251500	A0A144A382	PF3D7_1251500	2421.84	0.951204	0.184087			0.734977
PF3D7_1335600	Q8IDX4	PF3D7_1335600	107.664	1.25926	0.184087			0.734977
PF3D7_1448500	Q8IKY8	PF3D7_1448500	1103.95	-1.17818	0.18424			0.734616
MED6	Q8IKE0	PF3D7_1469700	128.484	-1.1764	0.184364			0.734324
PF3D7_0817200	Q8IB08	PF3D7_0817200	163.611	1.03209	0.184364			0.734324
PF3D7_1344500	A0A5K1K8P1	PF3D7_1344500	30.5767	-1.81788	0.184375			0.734298
PF3D7_1236800	Q8I555	PF3D7_1236800	32.3106	-1.52169	0.18478			0.733345
PF3D7_0406700	C0H492	PF3D7_0406700	155.62	-1.38925	0.184982			0.732871
PF3D7_0513600	Q8I0W8	PF3D7_0513600	1419.14	-1.04682	0.18517			0.732429
PF3D7_0936200	Q8I2F8	PF3D7_0936200	601.113	-1.14709	0.18517			0.732429
PF3D7_1318600	C0H5C4	PF3D7_1318600	16.4851	-1.98816	0.18517			0.732429
PF3D7_1001300	Q8IK23	PF3D7_1001300	13.038	-1.85372	0.18517			0.732429
PF3D7_0927500	C0H568	PF3D7_0927500	5.22062	-3.40368	0.18517			0.732429
PF3D7_1024800	Q8IJF6	PF3D7_1024800	7241.49	1.06839	0.185329			0.732057
PF3D7_0509400	Q8I410	PF3D7_0509400	5392.42	0.939778	0.185329			0.732057
PF3D7_1002400	PF3D7_1002400	PF3D7_1002400	6651.43	0.841982	0.185329			0.732057
PF3D7_0911900	Q8I333	PF3D7_0911900	5422.76	0.944772	0.185329			0.732057
PF3D7_0404300	Q8I1Y6	PF3D7_0404300	3477.17	0.848919	0.185329			0.732057
PF3D7_0610900	C6KSV4	PF3D7_0610900	3367.04	0.903415	0.185329			0.732057
PF3D7_0516800	Q8I3U0	PF3D7_0516800	560.584	-1.3459	0.185329			0.732057
PF3D7_0519800	Q8I3R2	PF3D7_0519800	1540.53	1.0055	0.185329			0.732057
PF3D7_0817600	Q8IB11	PF3D7_0817600	313.25	-1.29631	0.185329			0.732057
PF3D7_0804000	Q8IAN8	PF3D7_0804000	1853.78	0.873696	0.185329			0.732057
PF3D7_1337400	A0A5K1K8V2	PF3D7_1337400	783.781	0.951052	0.185329			0.732057
PF3D7_0215500	O96234	PF3D7_0215500	950.933	0.862401	0.185329			0.732057
PF3D7_0616200	C6KT03	PF3D7_0616200	202.6	-1.24872	0.185329			0.732057
PF3D7_1241900	Q8I510	PF3D7_1241900	1164.02	0.875325	0.185329			0.732057
PF3D7_0602400	C6KSM4	PF3D7_0602400	320.198	-0.962963	0.185329			0.732057
PF3D7_0629400	C6KTC9	PF3D7_0629400	313.159	-1.01296	0.185329			0.732057
PF3D7_1473500	Q8IKA2	PF3D7_1473500	548.286	1.0397	0.185329			0.732057
PF3D7_1211300	Q8I5T7	PF3D7_1211300	126.133	-1.23946	0.185329			0.732057
PF3D7_1114900	Q8IIL3	PF3D7_1114900	88.5774	-1.54266	0.185329			0.732057
PF3D7_1455700	Q8IKS1	PF3D7_1455700	123.578	-1.3907	0.185329			0.732057
PF3D7_1465000	Q8IKI8	PF3D7_1465000	100.669	-1.38959	0.185329			0.732057
PF3D7_0925300	Q8I2Q5	PF3D7_0925300	103.743	-1.36366	0.185329			0.732057
MAL8P1.31	C0H4X5	PF3D7_0824600	449.732	0.947088	0.185329			0.732057
PF3D7_1347100	Q8IDM7	PF3D7_1347100	104.969	-1.33662	0.185329			0.732057
PF3D7_1037700	Q8IJ30	PF3D7_1037700	236.9	1.19331	0.185329			0.732057
PF3D7_0530600	Q8I3G2	PF3D7_0530600	433.052	0.934739	0.185329			0.732057
PF3D7_0203100	O96134	PF3D7_0203100	86.1638	-1.14586	0.185329			0.732057
PF3D7_0809250	A0A5K1K8Z8	PF3D7_0809250	74.1391	-1.47286	0.185329			0.732057
PF3D7_1119800	Q8IIG9	PF3D7_1119800	334.218	0.93969	0.185329			0.732057
PF3D7_0917400	Q8I2X9	PF3D7_0917400	50.3629	-1.48943	0.185329			0.732057
PF3D7_1328400	C0H5E6	PF3D7_1328400	97.376	-1.08412	0.185329			0.732057
PF3D7_0730100	Q8IBF9	PF3D7_0730100	71.6443	-1.24982	0.185329			0.732057
PF3D7_1124000	Q8IIC3	PF3D7_1124000	272.184	0.913212	0.185329			0.732057
PF3D7_0104100	Q8I299	PF3D7_0104100	38.3993	-1.63049	0.185329			0.732057
PF3D7_0502600	C0H4C1	PF3D7_0502600	66.5071	-1.15974	0.185329			0.732057
PF3D7_0823600	Q8IB70	PF3D7_0823600	90.4087	1.24329	0.185329			0.732057
PF3D7_0108100	Q8I260	PF3D7_0108100	33.4546	-1.39115	0.185329			0.732057
PF3D7_1131300	Q8II51	PF3D7_1131300	33.6871	-1.30369	0.185329			0.732057
PF3D7_0314300	O97275	PF3D7_0314300	6.98886	-2.54611	0.185329			0.732057
PF3D7_0935000	Q8I2G9	PF3D7_0935000	740.517	0.871444	0.185376			0.731946
PF3D7_1364000	A0A5K1K9G3	PF3D7_1364000	70.5602	1.20759	0.185469			0.731729
PF3D7_0817300	Q8IB09	PF3D7_0817300	1232.04	-1.01245	0.185625			0.731364
PF3D7_1448000	Q8IKZ5	PF3D7_1448000	1912.68	0.997739	0.186223			0.729967
PF3D7_1413800	Q8ILV7	PF3D7_1413800	344.972	1.05719	0.186223			0.729967
PF3D7_0915600	Q8I2Z6	PF3D7_0915600	415.173	0.956445	0.186223			0.729967
PF3D7_MIT01800	PF3D7_MIT01800	PF3D7_MIT01800	36.9916	-1.60565	0.186223			0.729967
PF3D7_0313700	PF3D7_0313700	PF3D7_0313700	124.548	-1.37345	0.18634			0.729694
PF3D7_1445900	Q8IL13	PF3D7_1445900	4889.02	0.99011	0.186427			0.729491
PF11_0213	Q8IIG1	PF3D7_1120600	509.161	-1.23359	0.186427			0.729491
PF3D7_0417700	C0H4B2	PF3D7_0417700	20.0517	-2.02385	0.186463			0.729407
PF3D7_1207100	Q8I5X4	PF3D7_1207100	5180.39	0.884906	0.186564			0.729172
PF3D7_0422500	Q8IFP1	PF3D7_0422500	2408.02	0.866781	0.186564			0.729172
PF3D7_1435700	PF3D7_1435700	PF3D7_1435700	489.224	-1.21216	0.186564			0.729172
NTH1	C6KSY9	PF3D7_0614800	374.997	-1.16493	0.186564			0.729172
PF3D7_1104100	Q8IIW1	PF3D7_1104100	613.28	0.973637	0.186564			0.729172
PF3D7_0514300	Q8I3W4	PF3D7_0514300	238.236	-0.962017	0.186564			0.729172
PF3D7_1306900	C0H5A4	PF3D7_1306900	505.663	1.00163	0.186564			0.729172
PF3D7_1242900	Q8I500	PF3D7_1242900	68.5412	-1.13823	0.186564			0.729172
PF3D7_1434400	Q8ILC0	PF3D7_1434400	26.6662	-1.59353	0.186564			0.729172
PF3D7_1430900	Q8I6V2	PF3D7_1430900	62.2031	-1.54175	0.186623			0.729035
PF3D7_0702200	Q8IC45	PF3D7_0702200	1092.48	0.934521	0.186636			0.729005
PF3D7_1429800	Q8ILG6	PF3D7_1429800	2735.63	0.89175	0.186667			0.728932
PF3D7_1210100	Q8I5U8	PF3D7_1210100	115.126	-0.991832	0.186667			0.728932
PF3D7_1211000	Q8I5U0	PF3D7_1211000	115.604	-1.28549	0.186675			0.728914
PF3D7_1021400	A0A143ZZU2	PF3D7_1021400	668.854	0.905178	0.186855			0.728495
PF3D7_0715500	Q8IBU5	PF3D7_0715500	62.7335	-1.42203	0.186855			0.728495
PF3D7_0908400	Q8I367	PF3D7_0908400	36.9422	-1.49048	0.186855			0.728495
PF3D7_0723200	Q8IBM1	PF3D7_0723200	4.37759	-3.53286	0.186855			0.728495
PF3D7_1228500	Q8I5D3	PF3D7_1228500	122.72	-1.34197	0.187137			0.72784
PF3D7_1359400	Q8IDB7	PF3D7_1359400	4265.61	0.850278	0.187158			0.727792
PF3D7_0607500	C6KSS3	PF3D7_0607500	84.746	-1.08569	0.187158			0.727792
PF3D7_0623100	C6KT67	PF3D7_0623100	5058.15	0.882116	0.18721			0.727671
PF3D7_1365300	A0A5K1K935	PF3D7_1365300	275.905	0.989589	0.187472			0.727064
PF3D7_0209600	O96181	PF3D7_0209600	131.776	-1.51736	0.1879			0.726073
PF3D7_1214100	Q8I5R4	PF3D7_1214100	215.684	-1.07323	0.188214			0.725348
PF3D7_1112300	Q8IIP0	PF3D7_1112300	57.4618	-1.3711	0.188214			0.725348
PF3D7_1304600	Q8IER9	PF3D7_1304600	48.0725	-1.22957	0.188214			0.725348
PF3D7_0925400	Q8I2Q4	PF3D7_0925400	31.3918	-1.48235	0.188214			0.725348
PF3D7_0909300	Q8I359	PF3D7_0909300	1076.16	0.883806	0.188282			0.725191
PF3D7_0529900	Q8I3G9	PF3D7_0529900	1187.91	0.904101	0.188354			0.725025
PF3D7_0801500	Q8IAL3	PF3D7_0801500	916.442	0.97289	0.188354			0.725025
PF3D7_1229900	PF3D7_1229900	PF3D7_1229900	108.189	-1.13242	0.188488			0.724716
PF3D7_0408600	Q9U0K0	PF3D7_0408600	28.6255	-1.58154	0.188825			0.723941
PF3D7_0102600	B9ZSH8	PF3D7_0102600	555.551	-1.1911	0.189065			0.723389
PF3D7_1232100	Q8I0V3	PF3D7_1232100	594.059	-0.94762	0.189065			0.723389
PF3D7_0717600	A0A143ZVJ7	PF3D7_0717600	150.989	-1.26489	0.189126			0.723249
PF3D7_0824400	Q8IB78	PF3D7_0824400	321.252	-1.01269	0.18918			0.723125
PF3D7_0921600	Q8I2T7	PF3D7_0921600	661.056	0.942382	0.189351			0.722732
PF3D7_0528600	C0H4G5	PF3D7_0528600	463.014	0.918012	0.190286			0.720593
PF3D7_1453200	Q8IKU5	PF3D7_1453200	54.103	-1.46602	0.190286			0.720593
PF3D7_0721200	Q8IBN9	PF3D7_0721200	226.361	1.00201	0.190286			0.720593
PF3D7_1417800	Q8ILR7	PF3D7_1417800	853.328	-1.34335	0.190385			0.720367
PF3D7_1233400	A0A144A1C7	PF3D7_1233400	978.478	0.92337	0.190385			0.720367
PF3D7_1313600	Q8IEH7	PF3D7_1313600	16.7089	-2.03149	0.190385			0.720367
PF3D7_0418300	Q8I1Q4	PF3D7_0418300	11494.8	0.837402	0.190868			0.719267
PF3D7_1023800	Q8IJG7	PF3D7_1023800	25.8099	-1.89245	0.191068			0.718812
PF3D7_0507600	Q8I427	PF3D7_0507600	135.548	1.03546	0.191239			0.718424
PF3D7_0309500	O77330	PF3D7_0309500	3861.58	0.857639	0.191339			0.718197
PF3D7_0203400	Q8I668	PF3D7_0203400	220.795	-1.38659	0.191345			0.718183
PF3D7_1411400	Q8ILY1	PF3D7_1411400	117.44	-1.00158	0.191345			0.718183
PF3D7_0204100	Q9TY98	PF3D7_0204100	280.204	-1.33018	0.191519			0.717788
PF3D7_0409900	Q8I1V9	PF3D7_0409900	80.953	-1.20802	0.191519			0.717788
PF3D7_0935200	Q8I2G8	PF3D7_0935200	1826.52	0.823537	0.191556			0.717704
PF3D7_0907500	Q8I376	PF3D7_0907500	46.6753	-1.4584	0.191556			0.717704
PF3D7_1131100	Q8II53	PF3D7_1131100	61.7684	-1.22573	0.191556			0.717704
PF3D7_0710200	Q8IBY8	PF3D7_0710200	2342.63	-1.03484	0.191629			0.717539
PF3D7_1429100	Q8ILH3	PF3D7_1429100	495.01	-0.951103	0.191629			0.717539
PF3D7_0510000	Q8I404	PF3D7_0510000	76.6988	-1.58377	0.191629			0.717539
PF3D7_0414800	C0H4A4	PF3D7_0414800	38.1731	-1.67404	0.191629			0.717539
PF3D7_1146000	Q8IHQ8	PF3D7_1146000	659.438	0.940378	0.192077			0.716525
PF3D7_0816200	Q8IAZ9	PF3D7_0816200	74.6811	-1.31048	0.19209			0.716495
PF3D7_1450000	Q8IKX5	PF3D7_1450000	234.623	0.973332	0.19209			0.716495
PF3D7_1427800	Q8ILI7	PF3D7_1427800	218.979	0.996505	0.192118			0.716432
PF3D7_0318400	O77373	PF3D7_0318400	62.3108	-1.08759	0.192234			0.71617
PF3D7_MIT03200	PF3D7_MIT03200	PF3D7_MIT03200	233.73	-1.23116	0.192287			0.71605
PF3D7_0317200	O77385	PF3D7_0317200	984.247	-1.33115	0.192512			0.715542
PCNA	P61074	PF3D7_1361900	780.701	-1.3284	0.192857			0.714765
PF3D7_0802300	Q8IAM3	PF3D7_0802300	1628.86	0.883269	0.192857			0.714765
PF3D7_1416800	Q8ILS8	PF3D7_1416800	137.141	-1.09333	0.192857			0.714765
PF3D7_1454000	Q8IKT8	PF3D7_1454000	337.584	0.87179	0.192857			0.714765
PF3D7_0618600	C6KT26	PF3D7_0618600	49.4105	-1.23967	0.192857			0.714765
PF3D7_1212200	Q8I5T0	PF3D7_1212200	39.3047	-1.41895	0.192857			0.714765
PF3D7_1405600	Q8IM38	PF3D7_1405600	515.216	-1.17695	0.19294			0.714578
PF3D7_0829100	C0H4Y8	PF3D7_0829100	1164.07	0.878821	0.19294			0.714578
PF3D7_1425900	Q8ILK4	PF3D7_1425900	532.694	1.08442	0.193176			0.714047
PF3D7_0816400	C0H4U9	PF3D7_0816400	54.2372	-1.41807	0.193176			0.714047
PF3D7_0425700	Q8IFK9	PF3D7_0425700	2306.3	1.09267	0.193234			0.713916
PF3D7_1228400	Q8I5D4	PF3D7_1228400	2716.54	0.885019	0.193259			0.71386
PF3D7_1019700	Q8IJK5	PF3D7_1019700	247.367	-1.26947	0.193549			0.713209
PF3D7_0903400	Q8I3B4	PF3D7_0903400	7209.51	0.964599	0.193849			0.712536
PF3D7_1148700	Q8IHN7	PF3D7_1148700	5912.64	0.983451	0.193849			0.712536
PF3D7_1225600	A0A143ZZZ3	PF3D7_1225600	2885.51	0.875401	0.193849			0.712536
PF3D7_0932100	C0H584	PF3D7_0932100	418.531	-1.22985	0.193849			0.712536
PF3D7_0716000	Q8IBU0	PF3D7_0716000	2596.16	0.822568	0.193849			0.712536
PF3D7_1464500	Q8IKJ2	PF3D7_1464500	532.732	-0.914781	0.193849			0.712536
PF3D7_1033900	Q8IJ70	PF3D7_1033900	191.734	-1.38986	0.193849			0.712536
PF3D7_0917500	Q8I2X8	PF3D7_0917500	249.624	-1.30364	0.193849			0.712536
PF3D7_0819600	Q8IB31	PF3D7_0819600	304.209	-0.877631	0.193849			0.712536
PFL1605w	Q8I589	PF3D7_1233300	222.004	-1.33418	0.193849			0.712536
PF3D7_0829200	Q8IBC3	PF3D7_0829200	234.512	-0.941302	0.193849			0.712536
PF3D7_1457600	Q8IKQ4	PF3D7_1457600	377.676	0.975621	0.193849			0.712536
PF3D7_0611400	C6KSV9	PF3D7_0611400	482.108	0.86134	0.193849			0.712536
PF3D7_1369000	C0H5L4	PF3D7_1369000	77.3401	-1.19522	0.193849			0.712536
PF3D7_0927200	C0H566	PF3D7_0927200	44.5115	-1.58997	0.193849			0.712536
PF3D7_1360100	Q8IDA4	PF3D7_1360100	250.617	0.942501	0.193849			0.712536
PF3D7_1349800	Q8IDK1	PF3D7_1349800	157.063	1.09034	0.193849			0.712536
PF3D7_MIT00700	PF3D7_MIT00700	PF3D7_MIT00700	44.9417	-1.72386	0.193849			0.712536
PF3D7_0706200	A0A143ZVJ1	PF3D7_0706200	31.2641	-1.61248	0.193849			0.712536
PF3D7_1033600	Q7KQL1	PF3D7_1033600	2814.3	0.879674	0.194034			0.712122
PF3D7_0306500	O97246	PF3D7_0306500	132.861	-1.26443	0.194034			0.712122
PF3D7_1036900	A0A143ZYL5	PF3D7_1036900	22244.4	0.909154	0.194151			0.71186
PF3D7_1026600	Q8IJD6	PF3D7_1026600	3061.61	-1.38994	0.194151			0.71186
PF3D7_1339300	A0A5K1K8I2	PF3D7_1339300	3696.65	0.936678	0.194151			0.71186
PF3D7_1225700	Q8I5G0	PF3D7_1225700	2229.07	0.868467	0.194151			0.71186
PF3D7_0621300	C6KT51	PF3D7_0621300	1905.43	0.945763	0.194151			0.71186
PF14_0511	Q8IKU0	PF3D7_1453800	1686.49	0.912624	0.194151			0.71186
PF3D7_0630900	C6KTE4	PF3D7_0630900	1534.22	0.91798	0.194151			0.71186
PF3D7_1321300	Q8IEA1	PF3D7_1321300	1199.33	0.891089	0.194151			0.71186
PF3D7_0610100	C6KSU8	PF3D7_0610100	1842.64	0.854812	0.194151			0.71186
PF14_0358	Q7KQM2	PF3D7_1437800	358.464	0.94532	0.194151			0.71186
PF3D7_0410500	Q9U0I3	PF3D7_0410500	30.8887	-1.37614	0.194151			0.71186
PF3D7_1246100	Q8I4X1	PF3D7_1246100	21.722	-1.57249	0.194151			0.71186
PF3D7_0821000	Q8IB44	PF3D7_0821000	98.2313	-1.18488	0.194244			0.711652
PF3D7_1034600	Q8IJ64	PF3D7_1034600	83.7938	-1.30868	0.194244			0.711652
PF3D7_1430000	Q8ILG4	PF3D7_1430000	216.576	-0.870172	0.194278			0.711576
PF3D7_0811600	Q8IAV1	PF3D7_0811600	67.5877	-1.06996	0.194278			0.711576
PF3D7_1439600	Q8IL73	PF3D7_1439600	56.5023	-1.30376	0.194278			0.711576
PF3D7_0318200	O77375	PF3D7_0318200	8132.7	0.868346	0.19436			0.711393
PF3D7_1215400	Q8I5Q2	PF3D7_1215400	153.503	-1.42792	0.19461			0.710835
PF14_0093	Q8IM00	PF3D7_1409500	30.4235	-1.37641	0.194738			0.710549
PF3D7_0816800	Q8IB05	PF3D7_0816800	13.8409	-1.76849	0.194738			0.710549
PF3D7_0918900	Q8I2W4	PF3D7_0918900	1739.44	0.949357	0.194973			0.710026
PF3D7_0518500	A0A5K1K868	PF3D7_0518500	1373.4	0.876788	0.194973			0.710026
PF3D7_1110900	Q8IIQ3	PF3D7_1110900	917.971	0.853328	0.194973			0.710026
PF3D7_0521700	Q8I3P6	PF3D7_0521700	105.694	1.11237	0.194973			0.710026
PF3D7_1125000	Q8IIB3	PF3D7_1125000	102.564	-1.13538	0.195092			0.709761
PF3D7_1347500	A0A5K1K8Y8	PF3D7_1347500	17948.1	0.901914	0.195149			0.709634
PF3D7_0806700	A0A143ZVL6	PF3D7_0806700	1229.56	0.81825	0.195149			0.709634
PF3D7_0528800	Q8I3H9	PF3D7_0528800	568.468	1.02976	0.195149			0.709634
PF3D7_1035100	Q8IJ58	PF3D7_1035100	78.4773	-1.63282	0.195149			0.709634
PF3D7_1015100	Q8IJP4	PF3D7_1015100	264.098	0.943311	0.195149			0.709634
PF3D7_1202500	A0A144A060	PF3D7_1202500	162.245	1.0028	0.195149			0.709634
PF3D7_0504300	Q8I458	PF3D7_0504300	8.78945	-2.25831	0.195423			0.709024
PF3D7_0704100	C0H4K4	PF3D7_0704100	485.561	-1.31713	0.195426			0.709018
PF3D7_1311000	Q8IEK7	PF3D7_1311000	160.187	1.18726	0.195426			0.709018
PF3D7_0316400	O77391	PF3D7_0316400	284.423	-1.22791	0.195698			0.708414
PF3D7_1115300	Q8I6U5	PF3D7_1115300	615.675	1.05663	0.195786			0.708218
PF3D7_1131200	Q8II52	PF3D7_1131200	175.575	-0.924422	0.195786			0.708218
MCM7	Q8IC16	PF3D7_0705400	563.322	-1.32127	0.196005			0.707733
PF3D7_0215700	O96236	PF3D7_0215700	2933.1	0.856714	0.196005			0.707733
PF3D7_0510100	Q8I403	PF3D7_0510100	600.898	-1.27175	0.196005			0.707733
PF3D7_1325400	Q8IE65	PF3D7_1325400	350.155	-1.32511	0.196005			0.707733
PF3D7_0528100	Q8I3I6	PF3D7_0528100	1636.85	0.857231	0.196005			0.707733
PF3D7_0707900	Q8IC10	PF3D7_0707900	1225.26	0.924426	0.196005			0.707733
PF3D7_0206200	O96156	PF3D7_0206200	110.124	-1.23054	0.196005			0.707733
PF3D7_0409500	C0H4A1	PF3D7_0409500	97.642	-1.21965	0.196005			0.707733
PF3D7_1022900	Q8IJH6	PF3D7_1022900	48.7204	-1.4775	0.196005			0.707733
PF3D7_0309900	O77332	PF3D7_0309900	64.3757	-1.18111	0.196005			0.707733
PF3D7_1406400	Q8IM30	PF3D7_1406400	60.8115	-1.18723	0.196005			0.707733
PF3D7_1108100	Q8IIS1	PF3D7_1108100	30.9313	-1.48949	0.196005			0.707733
PF3D7_1236300	Q8I560	PF3D7_1236300	30.6291	-1.29979	0.196005			0.707733
PF3D7_1143000	C6S3G2	PF3D7_1143000	19.6611	-1.62702	0.196005			0.707733
PF3D7_1136000	Q8II04	PF3D7_1136000	537.484	-1.21669	0.196118			0.707483
PF3D7_1414700	Q8ILU9	PF3D7_1414700	723.081	0.928302	0.19625			0.70719
PF3D7_0705500	Q8IC15	PF3D7_0705500	2565.52	0.844356	0.19649			0.70666
PF3D7_1229100	Q8I5C7	PF3D7_1229100	12690.6	1.02107	0.196879			0.705801
PF3D7_0414100	Q8I1U6	PF3D7_0414100	62.3593	-1.1371	0.197179			0.705139
PF3D7_0614700	C6KSY8	PF3D7_0614700	29.1254	-1.73724	0.197281			0.704915
PF3D7_0909400	Q8I358	PF3D7_0909400	1762.01	0.961134	0.197524			0.70438
proRS	Q8I5R7	PF3D7_1213800	2015.98	0.937112	0.197524			0.70438
PF3D7_0705300	Q8IC17	PF3D7_0705300	270.68	-1.26473	0.197524			0.70438
PF3D7_1237600	A0A144A0C0	PF3D7_1237600	728.939	0.930933	0.197524			0.70438
PF3D7_0924500	C0H557	PF3D7_0924500	170.789	-0.932031	0.197524			0.70438
PF3D7_1311600	Q8IEK2	PF3D7_1311600	477.601	0.919498	0.197524			0.70438
PF3D7_0618100	C6KT21	PF3D7_0618100	77.4229	-1.00402	0.197524			0.70438
PF3D7_0731800	C0H4Q4	PF3D7_0731800	123.191	0.970307	0.197524			0.70438
PF3D7_1431100	Q8ILF4	PF3D7_1431100	15.8184	-1.92847	0.197524			0.70438
PF3D7_0902900	Q8I3B9	PF3D7_0902900	33.8851	-1.33009	0.197524			0.70438
PF3D7_1230200	PF3D7_1230200	PF3D7_1230200	158.569	-1.13776	0.197582			0.704253
PF3D7_0721100	Q8IBP0	PF3D7_0721100	1244.64	-1.04511	0.197741			0.703903
PF3D7_1250000	Q8I4T4	PF3D7_1250000	850.971	0.878556	0.197741			0.703903
PF3D7_1357400	A0A5K1K8N6	PF3D7_1357400	200.828	-1.11309	0.197741			0.703903
PF3D7_1030200	Q8IJA3	PF3D7_1030200	108.282	-1.29778	0.197741			0.703903
PF3D7_0503100	Q8I470	PF3D7_0503100	65.803	-1.16116	0.197741			0.703903
PF3D7_1207200	Q8I5X3	PF3D7_1207200	35.7194	-1.51021	0.197741			0.703903
PF3D7_0820700	Q8I6S5	PF3D7_0820700	408.287	-1.18087	0.197771			0.703837
PF3D7_1438500	Q8IL83	PF3D7_1438500	540.243	0.939973	0.197771			0.703837
PF3D7_0827000	Q8IBA2	PF3D7_0827000	3346.16	0.87075	0.197861			0.70364
PF3D7_0822900	Q8IB63	PF3D7_0822900	409.934	-1.24632	0.198037			0.703254
PF3D7_0418700	Q8I1Q0	PF3D7_0418700	1222.12	0.957296	0.198037			0.703254
PF3D7_1454300	Q8IKT6	PF3D7_1454300	129.16	-1.12926	0.198037			0.703254
PF3D7_0827500	C0H4Y5	PF3D7_0827500	111.147	-1.23793	0.198037			0.703254
PF3D7_0914400	Q8I308	PF3D7_0914400	50.8685	-1.54747	0.198037			0.703254
PF3D7_0310900	O77357	PF3D7_0310900	54.7183	-1.3989	0.198037			0.703254
PF3D7_1202800	Q8I617	PF3D7_1202800	205.551	0.969874	0.198037			0.703254
PF3D7_1130900	Q8II55	PF3D7_1130900	41.9856	-1.22067	0.198037			0.703254
PF3D7_1319400	A0A5K1K826	PF3D7_1319400	1387.66	-1.11368	0.198295			0.702688
PF3D7_1317000	Q8I6Z8	PF3D7_1317000	959.072	0.900568	0.198295			0.702688
PF3D7_1404400	Q8IM50	PF3D7_1404400	53.9597	-1.53061	0.198295			0.702688
PF3D7_0809500	C0H4T2	PF3D7_0809500	177.136	0.984343	0.198295			0.702688
PF3D7_0930500	Q8I2K9	PF3D7_0930500	1265.9	0.855432	0.198478			0.702288
MAL13P1.336	Q8ID39	PF3D7_1366900	10215.8	0.825472	0.1988			0.701584
PF3D7_1134200	Q8II22	PF3D7_1134200	1375.71	0.929379	0.1988			0.701584
PF3D7_0723900	Q8IBL4	PF3D7_0723900	1572.27	0.859729	0.1988			0.701584
PF3D7_0217100	O96252	PF3D7_0217100	251.286	-1.2757	0.1988			0.701584
PF3D7_0715600	Q8IBU4	PF3D7_0715600	228.191	-1.27955	0.1988			0.701584
PF3D7_1327400	A0A5K1K8S4	PF3D7_1327400	144.167	-1.25645	0.1988			0.701584
PF3D7_0927300	Q8I2N6	PF3D7_0927300	111.215	-1.29991	0.1988			0.701584
PF3D7_0531100	Q8I3F7	PF3D7_0531100	79.0793	-1.49318	0.1988			0.701584
PF3D7_1440300 Q8IL68	Q8IL68	PF3D7_1440200	69.4853	-1.15531	0.1988			0.701584
PF3D7_0728700	Q8IBH1	PF3D7_0728700	32.1111	-1.50145	0.1988			0.701584
PF3D7_1344700	A0A5K1K8X4	PF3D7_1344700	77.9991	1.28042	0.1988			0.701584
PF3D7_1474200	Q8IK96	PF3D7_1474200	21.1903	-1.76211	0.1988			0.701584
PF3D7_1326300	A0A5K1K940	PF3D7_1326300	1454.03	0.851628	0.198859			0.701455
PF3D7_0202500	O96128	PF3D7_0202500	25771	0.962576	0.19894			0.701278
PF3D7_1442400	Q8IL47	PF3D7_1442400	1121.88	-0.912896	0.198964			0.701225
PF3D7_1471200	Q8IKC7	PF3D7_1471200	732.564	-0.87959	0.198964			0.701225
PF3D7_1426900	Q8ILJ5	PF3D7_1426900	130.554	-1.12271	0.199023			0.701097
PF3D7_1123900	Q8IIC4	PF3D7_1123900	2055.21	0.847592	0.199532			0.699987
PFE1445c	Q8I3H7	PF3D7_0529000	871.355	0.904174	0.199532			0.699987
PF3D7_1330100	A0A5K1K9F1	PF3D7_1330100	120.792	-1.10011	0.199532			0.699987
PF3D7_0727500	Q8IBI2	PF3D7_0727500	80.7237	-1.10905	0.199532			0.699987
PF3D7_1245500	A0A144A322	PF3D7_1245500	86.2946	-1.40012	0.199575			0.699894
PF3D7_1343800	C0H5G6	PF3D7_1343800	160.595	-1.20746	0.200026			0.698914
PF3D7_1339700	A0A5K1K969	PF3D7_1339700	576.052	-1.09579	0.200035			0.698894
PF3D7_MIT02200	PF3D7_MIT02200	PF3D7_MIT02200	490.392	-0.92518	0.200035			0.698894
PF3D7_1308800	C0H5A8	PF3D7_1308800	261.218	-1.15457	0.200035			0.698894
PF3D7_1428200	Q8ILI3	PF3D7_1428200	894.683	0.822601	0.200035			0.698894
PF3D7_1208300	Q8I0V5	PF3D7_1208300	260.7	-1.09704	0.200035			0.698894
PF3D7_0819100	Q8IB26	PF3D7_0819100	464.311	0.992603	0.200035			0.698894
PF3D7_1331300	Q8IE14	PF3D7_1331300	104.368	-1.26706	0.200035			0.698894
PF3D7_0424900	Q8IFL7	PF3D7_0424900	461.747	0.961153	0.200077			0.698803
PF3D7_1147300	Q8IHP7	PF3D7_1147300	914.979	-1.20715	0.200204			0.698527
PF3D7_1442300	Q8IL48	PF3D7_1442300	1605.52	0.895389	0.200224			0.698484
PF3D7_1128000	PF3D7_1128000	PF3D7_1128000	1533.45	0.83907	0.200393			0.698117
PF3D7_1462700	Q8I6U9	PF3D7_1462700	266.814	-1.34035	0.200393			0.698117
PF3D7_0908200	Q8I369	PF3D7_0908200	69.7711	-1.27897	0.200393			0.698117
PF3D7_0309100	Q9NLA8	PF3D7_0309100	17.8556	-1.51411	0.200393			0.698117
PF3D7_0405200	Q8I1X7	PF3D7_0405200	247.096	-0.983059	0.200415			0.69807
PF3D7_1333900	A0A5K1K9F2	PF3D7_1333900	55.6151	-1.20298	0.200517			0.697849
PF3D7_1446500	Q8IL08	PF3D7_1446500	3685.94	0.879274	0.200769			0.697303
PF3D7_1227600	Q8I5E2	PF3D7_1227600	465.279	-1.1881	0.200769			0.697303
PF3D7_1422400	Q8ILM9	PF3D7_1422400	1092.21	0.928293	0.200769			0.697303
PF3D7_1032400	Q8IJ83	PF3D7_1032400	175.949	-1.30927	0.200769			0.697303
PF3D7_0519600	Q8I3R4	PF3D7_0519600	747.014	0.830576	0.200769			0.697303
PF3D7_0315500	O97270	PF3D7_0315500	68.3543	-1.30978	0.200769			0.697303
PF3D7_1358400	A0A5K1K9A9	PF3D7_1358400	14.2295	-1.6251	0.200769			0.697303
PF3D7_0527400	Q8I3J1	PF3D7_0527400	474.499	0.991281	0.200837			0.697156
PF3D7_1332100	Q8IE07	PF3D7_1332100	42.0986	-1.34966	0.200837			0.697156
PF3D7_1450800	Q8IKW8	PF3D7_1450800	31.0432	-1.31562	0.200837			0.697156
PF3D7_1021900	Q8IJI4	PF3D7_1021900	3555.3	-1.00819	0.201134			0.696515
PF3D7_1407100	Q8IM23	PF3D7_1407100	3307.34	0.848174	0.201134			0.696515
PF3D7_1316900	C0H5C0	PF3D7_1316900	1093.56	0.877711	0.201134			0.696515
PF3D7_0406400	C0H490	PF3D7_0406400	352.694	0.921942	0.201134			0.696515
PF3D7_MIT02900	PF3D7_MIT02900	PF3D7_MIT02900	22.3601	-1.69959	0.201134			0.696515
PF3D7_1336400	Q8IDW7	PF3D7_1336400	162.047	-0.932903	0.20158			0.695553
PF3D7_1360900	PF3D7_1360900	PF3D7_1360900	511.878	-1.28395	0.201664			0.695372
PF3D7_0213400	Q7YTF7	PF3D7_0213400	179.594	-1.04152	0.20174			0.695208
PF3D7_0211500	O96195	PF3D7_0211500	57.973	-1.58892	0.20174			0.695208
PF3D7_0305600	O97240	PF3D7_0305600	293.298	-1.2756	0.201751			0.695184
PF3D7_0302800	O77316	PF3D7_0302800	368.441	0.856177	0.201751			0.695184
PDEdelta	Q8IKD3	PF3D7_1470500	29.2192	-1.66153	0.201751			0.695184
PF3D7_1339600	A0A5K1K8W6	PF3D7_1339600	66.5086	-1.00552	0.201751			0.695184
PF3D7_1222400	Q8I5J1	PF3D7_1222400	325.613	-1.02009	0.201777			0.695128
PF3D7_1431300	Q8ILF2	PF3D7_1431300	1470.65	0.820335	0.202172			0.694279
PF3D7_1238500	Q8I538	PF3D7_1238500	866.007	-0.855277	0.202173			0.694277
PF3D7_1410200	Q8ILZ3	PF3D7_1410200	3823.26	0.89828	0.202204			0.69421
PF3D7_1473700	Q8IKA0	PF3D7_1473700	757.01	0.826391	0.202204			0.69421
PF3D7_0813700	Q8IAX3	PF3D7_0813700	274.88	-0.863142	0.202204			0.69421
PF3D7_1439700	Q8IL72	PF3D7_1439700	139.266	-1.04732	0.202204			0.69421
PF3D7_MIT02300	PF3D7_MIT02300	PF3D7_MIT02300	87.5018	-1.54445	0.202204			0.69421
PF3D7_1009400	Q8IJV1	PF3D7_1009400	224.587	0.996022	0.202204			0.69421
PF3D7_MIT00300	PF3D7_MIT00300	PF3D7_MIT00300	50.9455	-1.59341	0.202204			0.69421
PF3D7_1450900	Q8IKW7	PF3D7_1450900	41.7455	-1.38368	0.202204			0.69421
PF3D7_1466500	C6S3K1	PF3D7_1466500	3.9365	-3.36536	0.202204			0.69421
PF3D7_0424200	C0H496	PF3D7_0424200	226.006	-1.18325	0.202276			0.694056
PF3D7_1330300	C0H5E9	PF3D7_1330300	263.304	-0.888953	0.202426			0.693734
PF3D7_1410600	Q8ILY9	PF3D7_1410600	7471.79	0.811597	0.202652			0.693249
PF3D7_0416400	C0H4A7	PF3D7_0416400	1028.77	-1.03683	0.203058			0.69238
PF3D7_1131800	Q8II47	PF3D7_1131800	1055.26	-0.849823	0.203058			0.69238
PF3D7_0919000	Q8I2W3	PF3D7_0919000	7251.73	0.800332	0.203128			0.69223
PF3D7_1317100	Q8IEE5	PF3D7_1317100	1032.84	-1.21842	0.203128			0.69223
PF3D7_1124600	Q8IIB7	PF3D7_1124600	427.219	-1.03892	0.203128			0.69223
PF3D7_0206500	O96158	PF3D7_0206500	1145.07	0.773674	0.203128			0.69223
PF3D7_0725100	Q8IBK0	PF3D7_0725100	823.552	0.873446	0.203128			0.69223
PF3D7_0109800	Q8I246	PF3D7_0109800	628.463	0.85767	0.203128			0.69223
PF3D7_1363700	A0A5K1K8R3	PF3D7_1363700	100.665	-1.08386	0.203128			0.69223
PF3D7_1112900	A0A143ZZU6	PF3D7_1112900	17.3164	-2.17485	0.203128			0.69223
PF3D7_0531300	Q8I3F5	PF3D7_0531300	66.8539	-1.32767	0.203346			0.691764
PF3D7_1453000	Q8IKU7	PF3D7_1453000	368.857	0.890734	0.203346			0.691764
PF3D7_0821500	Q8IB49	PF3D7_0821500	274.039	1.01402	0.20353			0.691372
PF3D7_0912800	Q8I324	PF3D7_0912800	1313.03	0.885128	0.203936			0.690506
PF3D7_1329100	Q8IE50	PF3D7_1329100	985.218	-0.80359	0.204053			0.690257
PF3D7_0314500	O97261	PF3D7_0314500	1399.39	0.913566	0.204053			0.690257
PF3D7_1342400	Q8IDR5	PF3D7_1342400	1868.61	0.847277	0.204053			0.690257
PF3D7_1240200	PF3D7_1240200	PF3D7_1240200	121.056	4.23862	0.204053			0.690257
PF3D7_0205000	O96146	PF3D7_0205000	76.3008	-1.30481	0.204053			0.690257
PF3D7_MIT01400	PF3D7_MIT01400	PF3D7_MIT01400	65.9554	-1.32391	0.204053			0.690257
PF3D7_1006400	Q8IJX7	PF3D7_1006400	32.5349	-1.40804	0.204053			0.690257
PF3D7_1417900	C6S3H7	PF3D7_1417900	72.7623	-1.38529	0.204189			0.689968
PF3D7_0605500	C6KSQ3	PF3D7_0605500	37.6811	-1.46948	0.20432			0.689689
PF3D7_1000600	Q8IK32	PF3D7_1000600	53.2367	-1.12718	0.20432			0.689689
PF3D7_1207000	Q8I5X5	PF3D7_1207000	936.656	-1.199	0.204611			0.689071
PF3D7_0211100	O96192	PF3D7_0211100	31.62	-1.38859	0.204611			0.689071
PF3D7_1009000	Q8IJV5	PF3D7_1009000	421.675	1.0071	0.205011			0.688223
PF3D7_0419100	Q8I1P6	PF3D7_0419100	35.1045	-1.20558	0.205011			0.688223
PF3D7_1211100	Q8I5T9	PF3D7_1211100	23.949	-1.37631	0.205011			0.688223
PF3D7_1449400	Q8IKY1	PF3D7_1449400	219.275	-1.27988	0.205223			0.687774
PF3D7_0511300	Q8I3Z3	PF3D7_0511300	91.1581	-1.01468	0.205223			0.687774
PF3D7_1347700	Q8IDM2	PF3D7_1347700	1354.34	0.853788	0.205312			0.687586
PF3D7_1372000	C0H5M7	PF3D7_1372000	778.221	1.08802	0.205342			0.687522
PF3D7_1405400	Q8IM40	PF3D7_1405400	103.309	-1.02805	0.205342			0.687522
PF3D7_1411000	PF3D7_1411000	PF3D7_1411000	279.337	-1.32563	0.205659			0.686852
PF3D7_1463200	Q8IKK4	PF3D7_1463200	203.135	-1.29102	0.205659			0.686852
PF3D7_0913600	Q8I316	PF3D7_0913600	151.562	-1.25426	0.205694			0.686778
PF3D7_1476000	Q8IK78	PF3D7_1476000	232.515	1.05304	0.205694			0.686778
PF3D7_1121500	Q8IIF1	PF3D7_1121500	24.8396	-1.4609	0.205694			0.686778
PF3D7_0424600	Q8IFM0	PF3D7_0424600	3227.85	0.843554	0.206283			0.685537
PF3D7_0801000	Q8IAK9	PF3D7_0801000	7747.41	0.894736	0.206685			0.684691
PF3D7_1037000	A0A143ZYZ7	PF3D7_1037000	265.865	-1.08862	0.206685			0.684691
PF3D7_0609900	C6KSU6	PF3D7_0609900	265.845	0.833462	0.206685			0.684691
PF3D7_1433200	Q8ILD1	PF3D7_1433200	37.2203	-1.24487	0.206685			0.684691
PF3D7_1112100	Q8IIP2	PF3D7_1112100	812.55	-1.08003	0.206888			0.684265
PF3D7_0419300	Q8I1P4	PF3D7_0419300	180.547	-1.00015	0.207024			0.683979
PF3D7_0306100	O97243	PF3D7_0306100	608.06	0.847232	0.207024			0.683979
PF3D7_0627700	C6KTB3	PF3D7_0627700	3414.74	0.815932	0.207332			0.683334
PF3D7_0403700	Q8I1Z2	PF3D7_0403700	1973.42	0.827536	0.207332			0.683334
PF07_0047	P46468	PF3D7_0711000	622.969	-0.878474	0.207643			0.682683
PF3D7_1471600	Q8IKC3	PF3D7_1471600	7.8743	-2.74343	0.207643			0.682683
PF3D7_1444100	Q8IL30	PF3D7_1444100	269.11	-1.10925	0.207786			0.682384
PF3D7_0614900	C6KSZ0	PF3D7_0614900	223.733	-1.3531	0.207898			0.68215
PF3D7_0522300	C0H4F7	PF3D7_0522300	889.457	0.782541	0.207898			0.68215
PF3D7_0724900	Q8IBK2	PF3D7_0724900	38.2188	-1.58984	0.207977			0.681985
PF3D7_1147800	PF3D7_1147800	PF3D7_1147800	896.646	0.87106	0.208556			0.680777
PF3D7_1462300	Q8IKL1	PF3D7_1462300	2347.72	0.825213	0.208668			0.680544
PF3D7_0813600	Q8IAX2	PF3D7_0813600	1541.82	0.78114	0.208668			0.680544
PF3D7_0805600	A0A143ZY93	PF3D7_0805600	609.008	0.826279	0.208821			0.680226
PF3D7_0726050	A0A5K1K8M1	PF3D7_0726050	237.283	0.967633	0.208829			0.680209
PF3D7_1306500	C0H5A3	PF3D7_1306500	51.0386	-1.10237	0.208829			0.680209
PF3D7_0626700	C6KTA3	PF3D7_0626700	1276.55	0.829429	0.20908			0.679688
PF3D7_0504800	C0H4C4	PF3D7_0504800	401.517	-1.24805	0.209228			0.67938
PF3D7_0302600	O77308	PF3D7_0302600	92.5369	-1.30457	0.209228			0.67938
PF3D7_1430400	Q8ILG0	PF3D7_1430400	141.89	0.984966	0.209228			0.67938
PF3D7_1133200	Q8II32	PF3D7_1133200	1582.91	-1.25617	0.209329			0.679171
PF3D7_0821200	Q8IB46	PF3D7_0821200	239.038	0.835908	0.209425			0.678971
PF3D7_0415300	Q8I1T4	PF3D7_0415300	3614.95	0.78771	0.209481			0.678855
PF3D7_1460900	PF3D7_1460900	PF3D7_1460900	43.7162	-1.29362	0.209481			0.678855
PF3D7_0612000	C6KSW4	PF3D7_0612000	217.549	-0.893913	0.209636			0.678534
PF3D7_1133000	Q8II34	PF3D7_1133000	36.5795	1.23296	0.209784			0.678228
PF3D7_0617300	C6KT14	PF3D7_0617300	57.7887	-1.25384	0.209887			0.678014
PF3D7_1454200	Q8IKT7	PF3D7_1454200	210.477	1.07774	0.210021			0.677737
PF3D7_1227300	Q8I5E5	PF3D7_1227300	35.6487	-1.5945	0.210137			0.677497
PF3D7_0707700	Q8IC12	PF3D7_0707700	1680.81	0.851085	0.210421			0.676911
PF3D7_0909000	Q8I362	PF3D7_0909000	11.7947	-2.03956	0.210421			0.676911
PF3D7_1335700	Q8IDX3	PF3D7_1335700	178.761	-1.09139	0.210854			0.676018
PF3D7_0312200	O77346	PF3D7_0312200	16.2887	-1.62561	0.211185			0.675337
PF3D7_0215400	O96233	PF3D7_0215400	1757.22	0.844927	0.21135			0.674998
PF3D7_0411000	Q9U0H8	PF3D7_0411000	623.113	0.872182	0.211419			0.674856
PF3D7_0315600	O97271	PF3D7_0315600	56.871	-1.3783	0.211462			0.674768
PF3D7_0413300	Q8I1V4	PF3D7_0413300	5.81893	2.54887	0.211744			0.674189
PF3D7_1133300	Q8II31	PF3D7_1133300	44.985	-1.61153	0.211751			0.674175
PF3D7_0915000	Q8I302	PF3D7_0915000	125.045	-1.20462	0.211816			0.674041
PF3D7_0320200	C0H481	PF3D7_0320200	41.4319	-1.26508	0.211829			0.674015
PF3D7_1325900	A0A5K1K8R5	PF3D7_1325900	313.156	-1.22623	0.211938			0.673791
trx2	Q8IDP4	PF3D7_1345100	453.286	0.992118	0.211938			0.673791
PF3D7_0215600	O96235	PF3D7_0215600	557.039	0.783948	0.212209			0.673236
PF3D7_1239600	Q8I527	PF3D7_1239600	95.8962	-0.966461	0.212415			0.672815
PF3D7_0811500	A0A5K1K956	PF3D7_0811500	388.28	0.927744	0.212817			0.671994
PF3D7_0410100	PF3D7_0410100	PF3D7_0410100	3.87176	3.02444	0.212817			0.671994
PF3D7_1330700	A0A5K1K957	PF3D7_1330700	71.3708	-1.13529	0.21294			0.671743
PF3D7_1362800	C0H5K3	PF3D7_1362800	88.1591	-1.34756	0.213139			0.671337
PF3D7_0208500	Q7KWJ1	PF3D7_0208500	50.7102	-1.28023	0.213242			0.671127
PF3D7_0625300	C6KT89	PF3D7_0625300	245.007	-1.17903	0.213376			0.670854
PF3D7_0105000	PF3D7_0105000	PF3D7_0105000	28.7164	1.32607	0.213405			0.670795
PF3D7_1138600	Q8IHX9	PF3D7_1138600	474.66	0.806642	0.2136			0.670399
PF3D7_1010200	Q8IJU3	PF3D7_1010200	2250.95	0.853488	0.213783			0.670027
PF3D7_0923800	PF3D7_0923800	PF3D7_0923800	436.513	-1.16529	0.213783			0.670027
PF3D7_1111100	Q8IIQ1	PF3D7_1111100	291.617	-1.17197	0.213783			0.670027
PF3D7_1460500	Q8IKM7	PF3D7_1460500	296.478	-0.991529	0.213783			0.670027
PF3D7_0817800	Q8IB13	PF3D7_0817800	40.4056	-1.6356	0.213783			0.670027
PF3D7_1031500	Q8IJ90	PF3D7_1031500	988.622	0.774087	0.2142			0.669181
PF3D7_1312700	Q8IEJ5	PF3D7_1312700	281.175	-0.946971	0.214201			0.669179
PF3D7_0608300	C6KST1	PF3D7_0608300	156.774	-1.05994	0.214586			0.668399
PF3D7_0506200	Q8I440	PF3D7_0506200	107.29	0.955692	0.214586			0.668399
PF3D7_1359100	Q8IDB3	PF3D7_1359100	239.967	0.858815	0.215153			0.667253
PF3D7_1105300	Q8IIU9	PF3D7_1105300	90.6612	-0.980597	0.215192			0.667174
PF3D7_0407200	Q9U0L4	PF3D7_0407200	277.648	0.859673	0.215192			0.667174
PF3D7_0906100	Q8I388	PF3D7_0906100	125.856	-1.24878	0.215343			0.666869
PF3D7_1117300	Q8IIJ4	PF3D7_1117300	113.132	1.14985	0.215468			0.666617
PF3D7_0206300	PF3D7_0206300	PF3D7_0206300	6295.68	0.814281	0.215505			0.666543
PF3D7_0829400	C0H4Z0	PF3D7_0829400	280.603	-0.955098	0.215505			0.666543
PF3D7_1407700	Q8IM17	PF3D7_1407700	127.208	-1.33407	0.215505			0.666543
PF3D7_0111900	Q8I227	PF3D7_0111900	145.944	-0.935925	0.215505			0.666543
PF3D7_1222900	Q8I5I6	PF3D7_1222900	57.6525	-1.16023	0.215505			0.666543
PF3D7_1340100	A0A5K1K8M9	PF3D7_1340100	182.416	0.951789	0.215587			0.666377
PF3D7_0727100	C0H4P6	PF3D7_0727100	59.5632	-1.13419	0.215587			0.666377
PF3D7_0825300	Q8IB87	PF3D7_0825300	41.9104	-1.11438	0.215587			0.666377
PF3D7_0824100	Q8IB75	PF3D7_0824100	38.2813	-1.38807	0.215657			0.666236
PF3D7_1343500	A0A5K1K8C4	PF3D7_1343500	71.3611	-1.20106	0.21584			0.665868
PF3D7_0208600	O96173	PF3D7_0208600	278.683	-1.13698	0.216545			0.664452
PF3D7_0313900	O97257	PF3D7_0313900	47.4838	-1.36125	0.216545			0.664452
PF3D7_1015000	Q8IJP5	PF3D7_1015000	48.6309	-1.21895	0.216545			0.664452
PF3D7_0920600	Q8I2U7	PF3D7_0920600	101.339	-1.18389	0.216643			0.664255
PF3D7_0407000	Q9U0L6	PF3D7_0407000	134.737	1.05572	0.216643			0.664255
PF3D7_1418300	Q8ILR3	PF3D7_1418300	55.1315	-1.08037	0.216643			0.664255
PF3D7_1339000	A0A5K1K8Y9	PF3D7_1339000	7.94458	-2.1144	0.216946			0.663648
PF3D7_1342700	Q8IDR2	PF3D7_1342700	196.522	0.982184	0.216966			0.663608
PF3D7_0731600	Q8I6Z1	PF3D7_0731600	2158.84	-0.742965	0.217024			0.663492
PFC0760c	O77384	PF3D7_0317300	2807.18	0.792621	0.217024			0.663492
PF3D7_0610200	C6KSU9	PF3D7_0610200	3492.25	0.761446	0.217024			0.663492
PF3D7_0925700	Q7K6A1	PF3D7_0925700	1155.23	0.841976	0.217024			0.663492
PF3D7_0504600	Q8I0X1	PF3D7_0504600	78.4624	-1.32581	0.217024			0.663492
PF3D7_0420600	A0A146LZZ4	PF3D7_0420600	102.32	-1.30295	0.217024			0.663492
PF3D7_0321200	O97321	PF3D7_0321200	47.2151	-1.32036	0.217024			0.663492
PF3D7_1116900	A0A144A0T9	PF3D7_1116900	11.3036	-1.96294	0.217024			0.663492
PF3D7_1308700	Q8IEM7	PF3D7_1308700	284.818	-1.09424	0.217618			0.662305
PF3D7_1037100	Q8IJ37	PF3D7_1037100	357.209	-0.80484	0.217618			0.662305
PF3D7_1438800	A0A144A3K9	PF3D7_1438800	19.2849	-1.90202	0.217656			0.662229
PF3D7_0727200	Q8IBI5	PF3D7_0727200	669.455	0.874317	0.217672			0.662197
PF3D7_0828300	Q8IBB4	PF3D7_0828300	454.702	-0.809054	0.217702			0.662138
HDP	Q8IL04	PF3D7_1446800	92.2663	-1.21075	0.217702			0.662138
PF3D7_0522700	Q8I3N6	PF3D7_0522700	27.8767	-1.31216	0.217702			0.662138
PF3D7_1203700	Q8I608	PF3D7_1203700	9117.71	0.794534	0.217874			0.661795
PF3D7_1116500	Q8IIK1	PF3D7_1116500	95.3987	-0.980811	0.218173			0.661199
PF3D7_1359000	C0H5J0	PF3D7_1359000	1089.47	0.938491	0.218306			0.660934
PF3D7_1024900	Q8IJF5	PF3D7_1024900	116.961	-1.03746	0.218561			0.660427
PF3D7_0202900	A0A146M427	PF3D7_0202900	17.2788	-1.73866	0.218997			0.659562
PF3D7_1309300	Q8IEM1	PF3D7_1309300	2587.62	0.829306	0.219352			0.658858
PF3D7_0524600	Q8I3L9	PF3D7_0524600	158.611	-1.1437	0.219352			0.658858
PF3D7_1015400	Q8IJP1	PF3D7_1015400	152.823	-1.01703	0.219352			0.658858
PF3D7_1008800	Q8IJV7	PF3D7_1008800	5654.16	0.791738	0.21941			0.658744
PF3D7_0816600	Q8IB03	PF3D7_0816600	577.63	-0.949021	0.21941			0.658744
PF3D7_0106800	Q8I274	PF3D7_0106800	70.5516	-1.12112	0.21941			0.658744
PF3D7_0632500	C6KTF7	PF3D7_0632500	13497.3	5.65668	0.219637			0.658294
PF3D7_1428300	Q8ILI2	PF3D7_1428300	2841.2	0.777295	0.219637			0.658294
PF3D7_0207700	O96164	PF3D7_0207700	306.303	-1.47092	0.219637			0.658294
PF3D7_0730200	Q8IBF8	PF3D7_0730200	178.802	0.980572	0.219637			0.658294
PF3D7_1310000	Q8IEL5	PF3D7_1310000	8.93208	-2.09625	0.219637			0.658294
PF3D7_1226600	Q7KQJ9	PF3D7_1226600	104.323	-1.0145	0.220161			0.65726
PF3D7_1452500	Q8IKV1	PF3D7_1452500	53.7047	-1.1941	0.220161			0.65726
PF3D7_1018700	Q8IJL5	PF3D7_1018700	1470.95	0.911098	0.22029			0.657005
PF3D7_0920800	Q8I2U5	PF3D7_0920800	3108.85	0.861756	0.220342			0.656903
PF3D7_0210200	A0A143ZWL6	PF3D7_0210200	894.174	-0.932878	0.220342			0.656903
PF3D7_0721300	Q8IBN8	PF3D7_0721300	2226.14	0.816765	0.220342			0.656903
PF3D7_1235900	A0A144A2S8	PF3D7_1235900	2219.31	0.781772	0.220342			0.656903
PF3D7_0718100	Q8IBR9	PF3D7_0718100	311.996	-1.2428	0.220342			0.656903
PF3D7_0413700	Q8I1V0	PF3D7_0413700	371.276	-1.00712	0.220342			0.656903
PF3D7_0308600	O77325	PF3D7_0308600	1178.09	0.837315	0.220342			0.656903
PF3D7_1103400	Q8IIW9	PF3D7_1103400	279.356	-0.944062	0.220342			0.656903
PF3D7_0809200	Q8IAS8	PF3D7_0809200	562.112	0.86427	0.220342			0.656903
PF3D7_0902700	PF3D7_0902700	PF3D7_0902700	166.995	-1.03919	0.220342			0.656903
PF3D7_1326400	A0A5K1K977	PF3D7_1326400	363.613	0.956075	0.220342			0.656903
PF3D7_1415000	Q8ILU6	PF3D7_1415000	84.8532	-1.26574	0.220342			0.656903
PF3D7_1145500	Q8IHR3	PF3D7_1145500	91.8394	-1.19606	0.220342			0.656903
PF3D7_1457500	Q8IKQ5	PF3D7_1457500	79.8248	-1.16336	0.220342			0.656903
PF3D7_1463700	Q8IKK0	PF3D7_1463700	196.665	0.906939	0.220342			0.656903
PF3D7_1371700	A0A143ZWL4	PF3D7_1371700	58.9118	-1.21036	0.220342			0.656903
PF3D7_0622400	C6KT61	PF3D7_0622400	59.9714	-1.17322	0.220342			0.656903
PF3D7_1349100	Q8IDK8	PF3D7_1349100	27.8687	-1.54678	0.220342			0.656903
PF3D7_0826200	Q8IB95	PF3D7_0826200	14.5328	-1.66388	0.220342			0.656903
PF3D7_1355100	Q8IDF0	PF3D7_1355100	736.568	-1.10206	0.22054			0.656513
PF3D7_1137500	Q8IHZ0	PF3D7_1137500	110.014	-1.36811	0.22054			0.656513
PF3D7_1474100	Q8IK97	PF3D7_1474100	114.179	-1.25854	0.22054			0.656513
PF3D7_0310800	O77359	PF3D7_0310800	374.818	0.892558	0.22054			0.656513
PF3D7_1348700	A0A5K1K923	PF3D7_1348700	5.14733	-3.34512	0.22054			0.656513
PF3D7_1337500	A0A5K1K8Y0	PF3D7_1337500	2994.94	0.804374	0.220621			0.656353
PF3D7_0702400	Q8IC43	PF3D7_0702400	2305.19	0.996842	0.220621			0.656353
PF3D7_0525200	Q8I3L3	PF3D7_0525200	540.687	-0.915287	0.220621			0.656353
PF3D7_1113300	Q8IIM9	PF3D7_1113300	130.988	-1.13362	0.220621			0.656353
PF3D7_0505200	Q8I450	PF3D7_0505200	123.605	-0.901241	0.220621			0.656353
PF3D7_1113800	Q8IIM4	PF3D7_1113800	87.8743	-1.07698	0.220621			0.656353
PF3D7_1137200	Q8IHZ3	PF3D7_1137200	49.2398	-1.33302	0.220621			0.656353
PF3D7_1369700	C0H5L8	PF3D7_1369700	185.758	0.957744	0.220621			0.656353
PF3D7_MIT02800	PF3D7_MIT02800	PF3D7_MIT02800	23.615	-1.57756	0.220621			0.656353
PF3D7_1462200	Q8IKL2	PF3D7_1462200	22.6152	-1.49261	0.220621			0.656353
PF3D7_1339500	A0A5K1K9F4	PF3D7_1339500	20.9575	-1.44145	0.220621			0.656353
PF3D7_1221100	PF3D7_1221100	PF3D7_1221100	15.7499	-1.60577	0.220621			0.656353
PF3D7_0901800	C0H512	PF3D7_0901800	123.583	-0.958	0.220926			0.655753
PF3D7_1415500	A0A144A1F5	PF3D7_1415500	37.8587	-1.26851	0.220926			0.655753
PF3D7_0626000	C6KT96	PF3D7_0626000	830.782	0.915942	0.221032			0.655545
PF3D7_0323300	O97301	PF3D7_0323300	11.6519	-1.75217	0.221187			0.65524
PF3D7_1223400	Q8I5I3	PF3D7_1223400	12283.9	0.805322	0.221265			0.655087
PF3D7_0419800	Q8I1P0	PF3D7_0419800	1199.1	0.893865	0.221265			0.655087
PF3D7_0111300	Q8I233	PF3D7_0111300	376.27	-1.08031	0.221265			0.655087
PF3D7_0615500	C6KSZ6	PF3D7_0615500	218.982	-1.24617	0.221265			0.655087
PF3D7_MIT00200	PF3D7_MIT00200	PF3D7_MIT00200	36.2604	-1.51789	0.221265			0.655087
PF3D7_0818500	Q8IB20	PF3D7_0818500	2408.37	0.750115	0.221327			0.654966
PF3D7_0515000	Q8I3V8	PF3D7_0515000	3549.85	0.759852	0.221458			0.654709
PF3D7_1246800	Q8I4W4	PF3D7_1246800	415.107	-0.920982	0.221458			0.654709
PF3D7_1351900	A0A5K1K9A6	PF3D7_1351900	1208.55	0.794204	0.221458			0.654709
PF08_0048	C0H4W3	PF3D7_0820000	2697.06	0.777422	0.222068			0.653514
[truncated: 3,785 more rows]

## Sheet: DEG (filtered)
symbol	ensembl_ID	User_ID	baseMean	MEEDVAR0425800HA-VAR0425800HA_log2FC	MEEDVAR0425800HA-VAR0425800HA_FC	MEEDVAR0425800HA-VAR0425800HA_adjPval	Gene name	Product description
PF3D7_0936900	PF3D7_0936900	PF3D7_0936900	2098.29	-7.99533	-255.173	2.52308e-37	0	Plasmodium exported protein (PHISTb), unknown function, pseudogene
PF3D7_1240600	Q8I519	PF3D7_1240600	1764.34	6.93373	122.254	1.94425e-23	VAR	erythrocyte membrane protein 1, PfEMP1
PF3D7_1240400	Q8I520	PF3D7_1240400	177.349	5.88093	58.9301	2.15682e-17	VAR	erythrocyte membrane protein 1, PfEMP1
PF3D7_0102200	Q8I0U6	PF3D7_0102200	17825	4.44798	21.826	7.57516e-17	RESA	ring-infected erythrocyte surface antigen
PF3D7_0712300	Q8IBX1	PF3D7_0712300	508.195	6.10369	68.7692	2.04653e-16	VAR	erythrocyte membrane protein 1, PfEMP1
PF3D7_1200600	Q8I639	PF3D7_1200600	906.4	4.59372	24.1461	6.30452e-16	VAR2CSA	erythrocyte membrane protein 1, PfEMP1
PF3D7_1240900	A0A144A1K0	PF3D7_1240900	3967.71	4.90114	29.8806	1.52884e-14	VAR	erythrocyte membrane protein 1, PfEMP1
PF3D7_0202100	O96125	PF3D7_0202100	1235.21	4.65748	25.2373	1.90458e-14	LSAP2	liver stage associated protein 2
PF3D7_1150400	Q8IHM0	PF3D7_1150400	749.386	6.08133	67.7116	3.2235e-14	VAR	erythrocyte membrane protein 1, PfEMP1
PF3D7_0711700	Q8IBX3	PF3D7_0711700	255.296	4.70356	26.0563	9.50903e-14	VAR	erythrocyte membrane protein 1, PfEMP1
PF3D7_0712400	Q8IBX0	PF3D7_0712400	309.199	5.91664	60.4068	1.43359e-13	VAR	erythrocyte membrane protein 1, PfEMP1
PF3D7_1149500	PF3D7_1149500	PF3D7_1149500	173.885	-6.23207	-75.1691	1.4367e-13	RESA2	ring-infected erythrocyte surface antigen 2, pseudogene
PF3D7_1300100	Q8IEV1	PF3D7_1300100	125.989	6.53139	92.5004	6.69597e-13	VAR	erythrocyte membrane protein 1, PfEMP1
PF3D7_0324100	O97307	PF3D7_0324100	87.6981	6.88612	118.285	3.32439e-12	MC-2TM	Pfmc-2TM Maurer's cleft two transmembrane protein
PF3D7_0412700	Q9U0G5	PF3D7_0412700	175.094	4.35303	20.4358	3.37323e-12	VAR	erythrocyte membrane protein 1, PfEMP1
PF3D7_1200100	Q8I643	PF3D7_1200100	194.134	4.61496	24.5042	4.13193e-12	VAR	erythrocyte membrane protein 1, PfEMP1
PF3D7_0301300	Q9Y013	PF3D7_0301300	192.565	-9.87947	-941.925	9.76784e-12	EH1	epoxide hydrolase 1
PF3D7_1041300	Q8IIZ6	PF3D7_1041300	149.055	5.16216	35.8067	9.94056e-12	VAR	erythrocyte membrane protein 1, PfEMP1
PF3D7_0223100	O96292	PF3D7_0223100	89.3217	6.90646	119.964	1.49963e-11	RIF	rifin
PF3D7_1000800	PF3D7_1000800	PF3D7_1000800	130.524	-8.39311	-336.184	4.04266e-11	N/A	stevor, pseudogene
PF3D7_0712000	Q8IBX2	PF3D7_0712000	370.952	4.77344	27.3494	1.3244e-10	VAR	erythrocyte membrane protein 1, PfEMP1
PF3D7_0800200	Q8IAK2	PF3D7_0800200	169.869	5.20107	36.7856	1.78241e-10	VAR	erythrocyte membrane protein 1, PfEMP1
PF3D7_1240300	Q8I521	PF3D7_1240300	441.777	4.82569	28.3582	2.19089e-10	VAR	erythrocyte membrane protein 1, PfEMP1
PF3D7_0712900	Q8IBW7	PF3D7_0712900	151.512	4.66799	25.4218	2.19089e-10	VAR	erythrocyte membrane protein 1, PfEMP1
PF3D7_0712600	Q8IBW9	PF3D7_0712600	163.025	5.16634	35.9105	2.90585e-10	VAR	erythrocyte membrane protein 1, PfEMP1
PF3D7_0425100	Q8IFL4	PF3D7_0425100	86.8674	5.23155	37.5711	2.93388e-10	N/A	Plasmodium exported protein (hyp6), unknown function
PF3D7_1255200	Q8I4N5	PF3D7_1255200	138.213	4.74717	26.856	3.19186e-10	VAR	erythrocyte membrane protein 1, PfEMP1
PF3D7_0421300	Q8IFQ2	PF3D7_0421300	368.328	4.88611	29.571	5.64995e-10	VAR	erythrocyte membrane protein 1, PfEMP1
PF3D7_0632700	C6KTF8	PF3D7_0632700	82.3614	5.74169	53.5085	7.14005e-10	RIF	rifin
PFA0635c	Q9U0M8	PF3D7_0113300	1149.64	3.55476	11.7514	8.23591e-10	N/A	Plasmodium exported protein (hyp1), unknown function
PF3D7_0412400	Q9U0G6	PF3D7_0412400	865.615	4.37401	20.7353	9.77551e-10	VAR	erythrocyte membrane protein 1, PfEMP1
PF3D7_0202000	Q9TY99	PF3D7_0202000	93570	4.47735	22.2749	1.78691e-09	KAHRP	knob-associated histidine-rich protein
PF3D7_0900200	Q8I3E4	PF3D7_0900200	59.9922	4.94234	30.7462	1.78691e-09	RIF	rifin
PF3D7_0425200	Q8IFL3	PF3D7_0425200	70.3901	4.62804	24.7274	1.94042e-09	N/A	Plasmodium exported protein (hyp15), unknown function
PF3D7_1372500	PF3D7_1372500	PF3D7_1372500	405.344	5.6433	49.9808	2.19449e-09	N/A	stevor, pseudogene
PF3D7_0324300	PF3D7_0324300	PF3D7_0324300	64.8333	6.14836	70.9319	2.77595e-09	EPF4	exported protein family 4
PF3D7_0400400	Q8I218	PF3D7_0400400	154.196	4.97505	31.4514	5.13763e-09	VAR	erythrocyte membrane protein 1, PfEMP1
PF3D7_1219300	Q8I5L5	PF3D7_1219300	196.549	3.82866	14.2083	5.89521e-09	VAR	erythrocyte membrane protein 1, PfEMP1
PF3D7_1372100	C0H5M8	PF3D7_1372100	56.2944	6.56573	94.7287	8.20574e-09	GEXP04	Plasmodium exported protein (PHISTb), unknown function
PF3D7_0800100	Q8IAK1	PF3D7_0800100	158.975	5.50774	45.4983	9.46609e-09	VAR	erythrocyte membrane protein 1, PfEMP1
PF3D7_1150300	Q8IHM1	PF3D7_1150300	46.0402	6.33162	80.5393	1.07814e-08	RIF	rifin
PF3D7_1040200	Q8IJ07	PF3D7_1040200	94.8105	4.12701	17.4724	1.35602e-08	N/A	stevor
PF3D7_0301200	C0H466	PF3D7_0301200	48.151	-8.84502	-459.85	4.81606e-08	FIKK3	serine/threonine protein kinase, FIKK family
PF3D7_0808900	Q8IAS6	PF3D7_0808900	38.2476	-8.51049	-364.681	5.27203e-08	RIF	rifin
PF3D7_0900400	Q8I3E2	PF3D7_0900400	40.0309	4.77814	27.4386	6.43725e-08	RIF	rifin
PF3D7_0300100	O97324	PF3D7_0300100	62.6524	-7.30213	-157.819	1.05906e-07	VAR	erythrocyte membrane protein 1, PfEMP1
PF3D7_0808600	Q8IAS3	PF3D7_0808600	93.609	3.3324	10.0729	1.14224e-07	VAR	erythrocyte membrane protein 1, PfEMP1
PF3D7_1219400	PF3D7_1219400	PF3D7_1219400	1347.39	5.00365	32.0811	1.34678e-07	VAR	erythrocyte membrane protein 1 (PfEMP1), pseudogene
PF3D7_0700100	A0A143ZY53	PF3D7_0700100	47.2065	5.33103	40.2531	3.60562e-07	VAR	erythrocyte membrane protein 1, PfEMP1
PF3D7_1300400	Q8IEU8	PF3D7_1300400	25.7328	8.38305	333.848	4.19502e-07	RIF	rifin
PF3D7_0201900	O96124	PF3D7_0201900	7078.14	4.07505	16.8543	5.04453e-07	EMP3	erythrocyte membrane protein 3
PF3D7_0713100	Q8IBW5	PF3D7_0713100	139.63	4.85401	28.9203	5.04453e-07	MC-2TM	Pfmc-2TM Maurer's cleft two transmembrane protein
PF3D7_0421100	Q8IFQ4	PF3D7_0421100	50.5921	5.03325	32.746	5.04453e-07	VAR	erythrocyte membrane protein 1, PfEMP1
PF3D7_0808800	Q8IAS5	PF3D7_0808800	47.4264	-7.00551	-128.49	8.35132e-07	RIF	rifin
PF3D7_0900600	Q8I3E0	PF3D7_0900600	31.377	5.77236	54.6579	1.25727e-06	RIF	rifin
PF3D7_0115600	Q8I2C5	PF3D7_0115600	34.8338	6.9102	120.275	1.47555e-06	RIF	rifin
PF3D7_0900100	Q8I3E5	PF3D7_0900100	53.1088	4.07737	16.8815	1.76727e-06	VAR	erythrocyte membrane protein 1, PfEMP1
PF3D7_1240100	Q8I522	PF3D7_1240100	197.488	2.79109	6.92154	2.3344e-06	ETRAMP12	early transcribed membrane protein 12
PF3D7_1478400	PF3D7_1478400	PF3D7_1478400	39.5319	5.0239	32.5346	2.38732e-06	N/A	Plasmodium exported protein, unknown function, pseudogene
PF3D7_0712800	Q8IBW8	PF3D7_0712800	124.86	4.38143	20.8421	3.66457e-06	VAR	erythrocyte membrane protein 1, PfEMP1
PF3D7_0533100	PF3D7_0533100	PF3D7_0533100	34.0347	5.8159	56.3328	3.88797e-06	VAR1CSA	erythrocyte membrane protein 1 (PfEMP1), pseudogene
PF3D7_1300200	Q8IEV0	PF3D7_1300200	32.6993	5.75583	54.0354	4.41598e-06	RIF	rifin
PF3D7_0420700	Q8IFQ6	PF3D7_0420700	75.7366	4.47791	22.2836	5.59952e-06	VAR	erythrocyte membrane protein 1, PfEMP1
PF3D7_0425050	PF3D7_0425050	PF3D7_0425050	43.5741	3.85954	14.5157	6.90624e-06	N/A	Plasmodium exported protein, unknown function, pseudogene
PF3D7_1478100	Q8IK54	PF3D7_1478100	27.4865	5.49859	45.2106	2.49655e-05	N/A	Plasmodium exported protein (hyp13), unknown function
PF3D7_1000100	Q8IK37	PF3D7_1000100	267.061	2.78064	6.87157	3.02793e-05	VAR	erythrocyte membrane protein 1, PfEMP1
PF3D7_0101400	PF3D7_0101400	PF3D7_0101400	14.3176	7.54205	186.373	4.04819e-05	EPF1	exported protein family 1, pseudogene
PF3D7_0831750	PF3D7_0831750	PF3D7_0831750	28.816	4.52549	23.0307	4.09169e-05	N/A	Plasmodium exported protein (PHISTa), unknown function, pseudogene
PF3D7_0800900	PF3D7_0800900	PF3D7_0800900	62.5019	3.65503	12.5972	4.27224e-05	N/A	Plasmodium exported protein (hyp7), unknown function, pseudogene
PF3D7_0222600	O96289	PF3D7_0222600	27.9074	5.9555	62.056	4.27224e-05	RIF	rifin
PF3D7_0700800	A0A143ZWD4	PF3D7_0700800	29.4295	3.82336	14.1562	4.62091e-05	MC-2TM	Pfmc-2TM Maurer's cleft two transmembrane protein
PF3D7_0223500	O96296	PF3D7_0223500	406.945	4.25798	19.1329	5.07671e-05	VAR	erythrocyte membrane protein 1, PfEMP1
PF3D7_1200500	Q8I0E0	PF3D7_1200500	29.469	4.26001	19.1598	5.28432e-05	RIF	rifin
PF3D7_1301300	PF3D7_1301300	PF3D7_1301300	13.428	7.44654	174.435	6.80844e-05	N/A	Plasmodium exported protein (PHISTa-like), unknown function, pseudogene
PF3D7_0500800	Q8I492	PF3D7_0500800	19798.8	2.86233	7.27188	7.65886e-05	MESA	mature parasite-infected erythrocyte surface antigen
PF3D7_1240700	PF3D7_1240700	PF3D7_1240700	12.5661	7.34754	162.866	0.000101	RIF	rifin, pseudogene
PF3D7_0300200	O97325	PF3D7_0300200	18.2726	-7.44868	-174.693	0.000142	RIF	rifin
PF3D7_0420900	Q8IFQ5	PF3D7_0420900	20.4092	6.11371	69.2486	0.00015	VAR	erythrocyte membrane protein 1, PfEMP1
PF3D7_1478900	PF3D7_1478900	PF3D7_1478900	13.9696	-7.05831	-133.279	0.00016	N/A	non-coding RNA
PF3D7_0900300	Q8I3E3	PF3D7_0900300	27.9217	4.88032	29.4525	0.000187	RIF	rifin
PF3D7_0113600	PF3D7_0113600	PF3D7_0113600	98.1985	2.86339	7.27723	0.000195	SURF1.2	surface-associated interspersed protein 1.2 (SURFIN 1.2), pseudogene
PF3D7_0500100	Q8I495	PF3D7_0500100	20.0998	6.09269	68.2466	0.000195	VAR	erythrocyte membrane protein 1, PfEMP1
PF3D7_1002000	Q8IK16	PF3D7_1002000	367.251	2.61244	6.11536	0.000199	N/A	Plasmodium exported protein (hyp2), unknown function
PF3D7_0425900	Q8IFK8	PF3D7_0425900	100.084	-2.73091	-6.63876	0.000227	RIF	rifin
PF3D7_0808700	Q8IAS4	PF3D7_0808700	175.418	2.32044	4.99484	0.000227	VAR	erythrocyte membrane protein 1, PfEMP1
PF3D7_1200400	Q8I640	PF3D7_1200400	33.5639	3.94112	15.3602	0.000227	VAR	erythrocyte membrane protein 1, PfEMP1
PF3D7_1040100	Q8IJ08	PF3D7_1040100	18.5237	5.97009	62.687	0.000284	RIF	rifin
PF3D7_0324000	PF3D7_0324000	PF3D7_0324000	37.3335	4.67246	25.5006	0.0003	EPF1	exported protein family 1
PF3D7_0223400	O96295	PF3D7_0223400	26.1214	3.95092	15.4649	0.000312	RIF	rifin
PF3D7_0631300	Q8I0Q0	PF3D7_0631300	11.0021	7.15655	142.671	0.000339	EPF1	exported protein family 1
PF3D7_1240500	PF3D7_1240500	PF3D7_1240500	10.6808	7.11704	138.817	0.000339	N/A	Plasmodium RNA of unknown function RUF6
PF3D7_0413100	Q8I1V6	PF3D7_0413100	17.9895	5.92291	60.6698	0.000374	VAR	erythrocyte membrane protein 1, PfEMP1
PF3D7_1200700	Q8I638	PF3D7_1200700	10715.2	2.43619	5.41212	0.000377	ACS7	acyl-CoA synthetase
PF3D7_0800300	Q8IAK3	PF3D7_0800300	258.54	2.84363	7.17824	0.000381	VAR	erythrocyte membrane protein 1, PfEMP1
PF3D7_0220800	O96279	PF3D7_0220800	223.915	-3.49612	-11.2834	0.000514	CLAG2	cytoadherence linked asexual protein 2
PF3D7_1036300	Q8IJ45	PF3D7_1036300	25.6331	-4.98391	-31.645	0.000528	DBLMSP2	duffy binding-like merozoite surface protein 2
PF3D7_0202200	Q8I669	PF3D7_0202200	2038.36	2.30357	4.93679	0.00058	PTP1	EMP1-trafficking protein
PF3D7_1200610	A0A144A041	PF3D7_1200610	18.5772	4.6339	24.8281	0.00072	N/A	VAR2CSA uORF
PF3D7_0830500	Q8IBD1	PF3D7_0830500	7976.6	2.21661	4.648	0.000755	TryThrA	sporozoite and liver stage tryptophan-rich protein, putative
PF3D7_0114100	B9ZSJ3	PF3D7_0114100	18.3518	4.45613	21.9497	0.000891	MC-2TM	Pfmc-2TM Maurer's cleft two transmembrane protein
PF3D7_1149400	Q8IHM9	PF3D7_1149400	785.767	-2.31519	-4.97671	0.000924	N/A	Plasmodium exported protein, unknown function
PF3D7_0731200	Q8IBF0	PF3D7_0731200	329.504	2.17448	4.51425	0.000924	N/A	Plasmodium exported protein, unknown function
PFA0170c	Q8I2A6	PF3D7_0103400	1420.54	-2.1671	-4.4912	0.001022	N/A	zinc-carboxypeptidase, putative
PF3D7_1373400	C0H5N9	PF3D7_1373400	16.561	5.80252	55.8126	0.001119	RIF	rifin
PF3D7_1000700	PF3D7_1000700	PF3D7_1000700	28.3538	-3.72312	-13.206	0.001337	N/A	Plasmodium exported protein (PHISTa), unknown function, pseudogene
PF3D7_0833400	A0A146M1Z3	PF3D7_0833400	34.7329	4.25191	19.0525	0.001337	RIF	rifin
PF3D7_1410400	Q8ILZ1	PF3D7_1410400	899.138	-3.4283	-10.7652	0.001512	RAP1	rhoptry-associated protein 1
PF3D7_0732900	Q8IBD9	PF3D7_0732900	22.2119	3.97942	15.7734	0.001512	RIF	rifin
PF3D7_0425500	Q8IFL0	PF3D7_0425500	943.279	-2.11699	-4.33787	0.00164	N/A	stevor
RH5	Q8IFM5	PF3D7_0424100	231.649	-2.09124	-4.26114	0.001663	RH5	reticulocyte binding protein homologue 5
PF3D7_0219700	O96272	PF3D7_0219700	506.414	2.14621	4.42664	0.001897	GEXP20	Plasmodium exported protein (PHISTc), unknown function
PF3D7_0902300	Q8I3C5	PF3D7_0902300	1406.51	2.03742	4.1051	0.002384	FIKK9.4	serine/threonine protein kinase, FIKK family
PF3D7_0817700	C0H4V4	PF3D7_0817700	210.052	-3.20277	-9.20724	0.002495	RON5	rhoptry neck protein 5
PF3D7_1300300	Q8IEU9	PF3D7_1300300	390.667	5.76083	54.2229	0.002592	VAR	erythrocyte membrane protein 1, PfEMP1
PF3D7_1040300	Q8IJ06	PF3D7_1040300	15.7805	4.15321	17.7926	0.002632	RIF	rifin
PF3D7_0103100	Q8I2A9	PF3D7_0103100	97.8641	-2.30726	-4.94941	0.002916	VPS51	vacuolar protein sorting-associated protein 51, putative
PF3D7_1476600	Q8IK70	PF3D7_1476600	167.229	1.96588		0.002917	N/A	Plasmodium exported protein, unknown function
PF3D7_1302050	A0A5K1K810	PF3D7_1302050	175.69	2.5132	5.70886	0.002943	N/A	hypothetical protein
PF3D7_0103500	B9ZSI1	PF3D7_0103500	118.963	-2.16747	-4.49235	0.002951	N/A	conserved Plasmodium protein, unknown function
PF3D7_0701100	A0A143ZWN4	PF3D7_0701100	27.3545	3.01218	8.06781	0.003091	RIF	rifin
PF3D7_0814500	Q8IAY2	PF3D7_0814500	449.13	2.36109	5.13757	0.004029	N/A	conserved protein, unknown function
PF3D7_0618000	C6KT20	PF3D7_0618000	141.222	-3.37884	-10.4024	0.004505	N/A	conserved Plasmodium membrane protein, unknown function
PF3D7_1219500	PF3D7_1219500	PF3D7_1219500	12.7827	4.42474	21.4774	0.004508	VAR	erythrocyte membrane protein 1 (PfEMP1), exon 2, pseudogene
PF3D7_0707300	C0H4M0	PF3D7_0707300	1532.06	-3.28977	-9.77955	0.004673	RAMA	rhoptry-associated membrane antigen
PF3D7_1468400	A0A144A3J8	PF3D7_1468400	46.8307	-3.1753	-9.03357	0.004828	CZIF1	C3H1-type zinc finger protein CZIF1
PF3D7_1477800	Q8IK57	PF3D7_1477800	16.1141	3.7069	13.0584	0.004976	ACBP	acyl-CoA binding protein
PF3D7_1254300	Q8I4P4	PF3D7_1254300	7.2364	6.56125	94.4352	0.005816	N/A	stevor
PF3D7_0102500	Q8I2B4	PF3D7_0102500	1231.92	-3.04674	-8.26344	0.00673	EBA181	erythrocyte binding antigen-181
PF3D7_0101600	Q8I2C1	PF3D7_0101600	14.715	4.12643	17.4654	0.00673	RIF	rifin
PF3D7_0421200	Q8IFQ3	PF3D7_0421200	7.0933	6.52322	91.9785	0.00673	RIF	rifin
PF3D7_0402000	Q8I206	PF3D7_0402000	4819.22	-1.92942		0.006829	N/A	Plasmodium exported protein (PHISTa), unknown function
PF3D7_1126700	Q8II97	PF3D7_1126700	327.757	-3.09127	-8.52246	0.006829	ATG23	conserved Plasmodium protein, unknown function
PF3D7_0401900	Q8I0V8	PF3D7_0401900	127.08	-2.45024	-5.46508	0.007002	ACS6	acyl-CoA synthetase
PF3D7_0101500	PF3D7_0101500	PF3D7_0101500	26.803	4.00116	16.0129	0.007261	VAR	erythrocyte membrane protein 1 (PfEMP1), exon 2, pseudogene
PF3D7_0425800	Q8I098	PF3D7_0425800	81136.5	1.99315		0.007465	VAR	erythrocyte membrane protein 1, PfEMP1
PF3D7_0413400	PF3D7_0413400	PF3D7_0413400	75.5459	2.38526	5.22437	0.007465	VAR	erythrocyte membrane protein 1 (PfEMP1), exon 1, pseudogene
PF3D7_1243900	Q8I4Z1	PF3D7_1243900	255.634	-2.71862	-6.58242	0.007739	DOC2	double C2-like domain-containing protein
PF3D7_1200800	Q8I637	PF3D7_1200800	337.593	1.97618		0.008012	FIKK12	serine/threonine protein kinase, FIKK family
PF3D7_0221700	A0A143ZYC7	PF3D7_0221700	33.2634	2.57684	5.96632	0.009068	N/A	Plasmodium exported protein, unknown function
PF3D7_0425600	PF3D7_0425600	PF3D7_0425600	318.171	-1.99695		0.009075	RIF	rifin, pseudogene
PF3D7_1252600	Q8I4R0	PF3D7_1252600	570.016	1.85033		0.010559	N/A	esterase, putative
PF3D7_0400200	PF3D7_0400200	PF3D7_0400200	511.274	-1.94986		0.012102	N/A	erythrocyte membrane protein 1 (PfEMP1), exon 2, pseudogene
PF3D7_1253300	PF3D7_1253300	PF3D7_1253300	747.467	1.79319		0.012102	N/A	Plasmodium exported protein (PHISTa), unknown function, pseudogene
PF3D7_0210800	O96190	PF3D7_0210800	239.399	1.80351		0.012102	N/A	conserved Plasmodium protein, unknown function
PF3D7_0101100	O97308	PF3D7_0101100	6.19859	6.32022	79.9056	0.012259	EPF4	exported protein family 4
PF3D7_0725400	Q8IBJ7	PF3D7_0725400	354.468	-2.87867	-7.35474	0.012636	N/A	conserved Plasmodium protein, unknown function
PF3D7_0733000	Q8IBD8	PF3D7_0733000	566.55	5.52645	46.0921	0.013448	VAR	erythrocyte membrane protein 1, PfEMP1
PF3D7_1352900	Q8IDH1	PF3D7_1352900	2049.27	2.03662	4.10284	0.013506	N/A	Plasmodium exported protein, unknown function
PF3D7_1002100	Q8IK15	PF3D7_1002100	4029.33	1.95893		0.013721	PTP5	EMP1-trafficking protein
PF3D7_0221900	PF3D7_0221900	PF3D7_0221900	8.43622	5.78163	55.0104	0.014651	N/A	erythrocyte membrane protein 1 (PfEMP1), pseudogene
PF3D7_0919300	Q8I2W0	PF3D7_0919300	200.372	-3.16799	-8.98797	0.015203	TrxL1	thioredoxin-like protein 1, putative
PF3D7_0201700	O96122	PF3D7_0201700	2464.51	1.894		0.01527	N/A	DnaJ protein, putative
PF3D7_0909500	Q8I357	PF3D7_0909500	22.1391	-3.92284	-15.1667	0.01527	SPM1	subpellicular microtubule protein 1, putative
PF3D7_1012200	Q8IJS3	PF3D7_1012200	121.503	-2.99748	-7.98605	0.015512	RA	rhoptry associated adhesin
PF3D7_0103600	Q8I2A4	PF3D7_0103600	498.17	-1.70886		0.017768	PSH1	ATP-dependent DNA/RNA helicase PSH1
PF3D7_1102900	Q8IIX2	PF3D7_1102900	82.3693	2.26753	4.81499	0.018467	N/A	Plasmodium exported protein (hyp11), unknown function
PF3D7_0302300	PF3D7_0302300	PF3D7_0302300	2752.26	4.68064	25.6455	0.018568	N/A	erythrocyte membrane protein 1 (PfEMP1), pseudogene
PF3D7_0722200	Q8IBN1	PF3D7_0722200	528.937	-2.85177	-7.21885	0.019276	RALP1	rhoptry-associated leucine zipper-like protein 1
PF3D7_1221400	Q8I5J9	PF3D7_1221400	33.0054	-3.00372	-8.02067	0.020361	IMC1h	inner membrane complex protein 1h, putative
PF3D7_1240000	Q8I523	PF3D7_1240000	377.716	1.63653		0.020396	N/A	3-hydroxyisobutyryl-CoA hydrolase, putative
PF3D7_1145200	Q8IHR5	PF3D7_1145200	379.056	-2.89412	-7.43392	0.021047	N/A	serine/threonine protein kinase, putative
PF3D7_0905400	Q8I395	PF3D7_0905400	2475.26	-2.82015	-7.06234	0.02117	RhopH3	high molecular weight rhoptry protein 3
PF3D7_1478000	Q8IK55	PF3D7_1478000	33.4189	3.14825	8.86582	0.02326	GEXP17	Plasmodium exported protein (PHISTa), unknown function
PF3D7_1016800	Q8IJN0	PF3D7_1016800	1410.97	1.70235		0.024942	N/A	Plasmodium exported protein (PHISTc), unknown function
PF3D7_1116000	Q8IIK5	PF3D7_1116000	320.14	-2.75952	-6.77173	0.024942	RON4	rhoptry neck protein 4
PF3D7_1476300	Q8IK74	PF3D7_1476300	183.181	-2.9933	-7.96296	0.025186	N/A	Plasmodium exported protein (PHISTb), unknown function
PF3D7_0604100	C6KSN9	PF3D7_0604100	253.834	-2.94775	-7.71547	0.025249	SIP2	AP2 domain transcription factor
PF3D7_1102500	Q8IIX5	PF3D7_1102500	766.247	1.63158		0.025826	GEXP02	gametocyte exported protein 2
PF3D7_1252900	Q8I4Q7	PF3D7_1252900	216.477	1.95409		0.026291	N/A	Plasmodium exported protein, unknown function
PF3D7_1254200	Q8I4P5	PF3D7_1254200	10.741	4.1635	17.92	0.026291	RIF	rifin
PF3D7_1251200	Q8I4S2	PF3D7_1251200	699.456	-2.80456	-6.98643	0.026376	N/A	coronin
PF3D7_1323700	Q8IE80	PF3D7_1323700	234.434	-2.68756	-6.44221	0.026376	GAPM1	glideosome associated protein with multiple membrane spans 1
PF3D7_1206100	A0A144A134	PF3D7_1206100	22.3459	-3.10201	-8.58617	0.026376	ISN1	IMP-specific 5'-nucleotidase 1
PF3D7_0108500	Q8I257	PF3D7_0108500	7336.67	1.65261		0.026645	N/A	ELM2 domain-containing protein, putative
PF3D7_0936700	Q8I2F3	PF3D7_0936700	82.6076	-2.3803	-5.20644	0.026898	N/A	lysophospholipase, putative
PF3D7_0701400	PF3D7_0701400	PF3D7_0701400	18.6346	3.78735	13.8072	0.026898	EPF4	exported protein family 4, pseudogene
PF3D7_1035300	Q8IJ56	PF3D7_1035300	163.052	-2.68216	-6.41816	0.02736	GLURP	glutamate-rich protein GLURP
PF3D7_0426000	Q8IFK7	PF3D7_0426000	119.647	2.10657	4.30666	0.027622	VAR	erythrocyte membrane protein 1, PfEMP1
PF3D7_0108600	Q8I256	PF3D7_0108600	7381.38	1.63341		0.027662	N/A	DnaJ domain-containing protein, putative
PF3D7_1013800	Q8IJQ7	PF3D7_1013800	236.804	-2.39919	-5.27508	0.02873	N/A	conserved Plasmodium protein, unknown function
PF3D7_1372600	C0H5N2	PF3D7_1372600	107.236	6.02475	65.1072	0.028845	RIF	rifin
PF3D7_0214900	O96229	PF3D7_0214900	673.49	-2.63003	-6.19039	0.028997	RON6	rhoptry neck protein 6
PF3D7_1444500	Q8IL26	PF3D7_1444500	1008.06	1.57875		0.029326	eIK1	eukaryotic translation initiation factor 2-alpha kinase 1
PF3D7_0324900	O97312	PF3D7_0324900	287.914	1.52794		0.029326	VAR	erythrocyte membrane protein 1, PfEMP1
PF3D7_1028700	Q8IJB7	PF3D7_1028700	610.918	-2.33638	-5.05033	0.030153	MTRAP	merozoite TRAP-like protein
PF3D7_1435600	Q8ILA8	PF3D7_1435600	124.88	-2.68335	-6.42345	0.030153	N/A	conserved Plasmodium protein, unknown function
PF3D7_1427100	Q8ILJ3	PF3D7_1427100	4551.91	1.64469		0.030407	N/A	lipase, putative
PF3D7_1201200	Q8I633	PF3D7_1201200	2610.22	1.69504		0.030478	N/A	Plasmodium exported protein (PHISTa-like), unknown function
PF3D7_0632400	C6KTF6	PF3D7_0632400	5.18757	6.08112	67.7016	0.030478	RIF	rifin
PF3D7_1321100	C0H5C8	PF3D7_1321100	226.58	-2.4915	-5.62361	0.030507	N/A	protein kinase domain-containing protein, putative
PF3D7_1038800	Q8IJ23	PF3D7_1038800	755.113	1.77279		0.030789	N/A	RESA-like protein with PHIST and DnaJ domains
PF3D7_1406800	Q8IM26	PF3D7_1406800	388.265	-2.51954	-5.73399	0.030916	GAPM3	glideosome associated protein with multiple membrane spans 3
PF3D7_0929400	C0H571	PF3D7_0929400	979.325	-2.6574	-6.30893	0.031458	RhopH2	high molecular weight rhoptry protein 2
PF3D7_1101100	Q8IIY5	PF3D7_1101100	20.3603	3.05754	8.32549	0.031993	RIF	rifin
PF3D7_1247500	Q8I4V7	PF3D7_1247500	30.5476	-2.44546	-5.44699	0.032332	N/A	serine/threonine protein kinase, putative
PF3D7_0405900	Q8I1W9	PF3D7_0405900	237.397	-2.86189	-7.26969	0.032749	ASP	apical sushi protein
PF3D7_1449300	PF3D7_1449300	PF3D7_1449300	1454.97	1.54546		0.032914	BRF1	transcription factor IIIb subunit, putative
PF3D7_1423300	Q8ILL9	PF3D7_1423300	105.298	-2.3199	-4.99299	0.032914	PP7	serine/threonine protein phosphatase 7
PF3D7_0210600	O96188	PF3D7_0210600	69.729	-2.69359	-6.46923	0.032914	CERLI1	protein CERLI1
PF3D7_1371600	PF3D7_1371600	PF3D7_1371600	106.239	-2.37404	-5.1839	0.033111	EBL1	erythrocyte binding like protein 1, pseudogene
PF14_0013	Q8IM77	PF3D7_1401100	9861.32	1.80912		0.033153	A8IJP	HSPA8-interacting J protein
PF3D7_1223100	Q7KQK0	PF3D7_1223100	847.069	-2.32102	-4.99685	0.033476	PKAr	cAMP-dependent protein kinase regulatory subunit
PF3D7_1216500	Q8I5P2	PF3D7_1216500	153.204	-2.45427	-5.48036	0.033729	MDV1	male development gene 1
PF3D7_1115800	Q8IIK7	PF3D7_1115800	2337.51	1.65532		0.033861	N/A	conserved Plasmodium protein, unknown function
PF3D7_0220700	Q8I653	PF3D7_0220700	334.742	1.75937		0.034066	N/A	Plasmodium exported protein (hyp9), unknown function
PF3D7_0830600	Q8IBD2	PF3D7_0830600	5595.86	1.71554		0.034502	N/A	Plasmodium exported protein (PHISTc), unknown function
PF3D7_1003400	Q8IK03	PF3D7_1003400	122.49	-2.18139	-4.5359	0.034502	N/A	conserved Plasmodium protein, unknown function
PF3D7_0502400	Q8I476	PF3D7_0502400	2465.68	1.74782		0.034615	MSP8	merozoite surface protein 8
PF3D7_0525800	Q8I3K7	PF3D7_0525800	261.888	-2.55231	-5.86574	0.034661	IMC1g	inner membrane complex protein 1g
PF3D7_1413200	Q8ILW2	PF3D7_1413200	211.34	-2.21963	-4.65774	0.034968	N/A	conserved Plasmodium protein, unknown function
PF3D7_1143100	Q8IHT5	PF3D7_1143100	132.788	-2.5351	-5.79619	0.034997	AP2-O	AP2 domain transcription factor AP2-O
PF3D7_0301400	C0H467	PF3D7_0301400	85.9228	-2.08339	-4.23801	0.035128	N/A	Plasmodium exported protein, unknown function
PF3D7_0802600	C0H4R1	PF3D7_0802600	206.885	-2.34782	-5.09053	0.03546	ACbeta	adenylyl cyclase beta
PF3D7_1148800	Q8IHN6	PF3D7_1148800	514.756	1.67423		0.035651	N/A	Plasmodium exported protein (hyp11), unknown function
PF3D7_1031400	PF3D7_1031400	PF3D7_1031400	77.1531	-2.50236	-5.6661	0.035651	OTU	OTU-like cysteine protease
PF3D7_0424000	C0H495	PF3D7_0424000	1497.6	-1.82419		0.03706	N/A	Plasmodium exported protein (PHISTc), unknown function
PF3D7_1001800	Q8IK18	PF3D7_1001800	497.027	1.65403		0.037338	N/A	Plasmodium exported protein (PHISTc), unknown function
PF3D7_0935600	Q8I2G4	PF3D7_0935600	8864.96	1.7773		0.037383	GIG	gametocytogenesis-implicated protein
PF3D7_0730800	PF3D7_0730800	PF3D7_0730800	9551.59	1.48341		0.037914	N/A	Plasmodium exported protein, unknown function
PF3D7_0802800	Q8IAM8	PF3D7_0802800	153.225	-2.447	-5.45281	0.038078	CNA	serine/threonine protein phosphatase 2B catalytic subunit A
PF3D7_0515700	Q8I3V1	PF3D7_0515700	566.799	-2.49737	-5.64655	0.038419	GAP40	glideosome-associated protein 40
PF3D7_1001900	Q8IK17	PF3D7_1001900	1066.79	1.82939		0.038419	PfJ23	Plasmodium exported protein (hyp16), unknown function
PF3D7_1022100	C6S3D3	PF3D7_1022100	471.537	1.70887		0.038419	N/A	methyltransferase, putative
PF3D7_0532600	C0H4H1	PF3D7_0532600	311.137	-2.09766	-4.28016	0.038726	N/A	Plasmodium exported protein, unknown function
PF3D7_0105300	Q8I288	PF3D7_0105300	131.209	-2.54529	-5.83727	0.038726	CAP	cyclase-associated protein
PF3D7_1409400	Q8IM01	PF3D7_1409400	128.38	-2.20919	-4.62415	0.038726	N/A	conserved protein, unknown function
PF3D7_1100300	Q8IIZ3	PF3D7_1100300	174.408	6.23428	75.2844	0.039889	RIF	rifin
PF3D7_1035900	Q8IJ49	PF3D7_1035900	208.024	-2.56537	-5.91908	0.040012	MAAP	merozoites-associated armadillo repeats protein
PF3D7_1036600	PF3D7_1036600	PF3D7_1036600	47.2383	-2.23354	-4.70288	0.040052	N/A	conserved protein, unknown function
PF3D7_0407700	Q9U0K9	PF3D7_0407700	365.847	-2.10936	-4.315	0.042208	N/A	TH1 domain-containing protein, putative
PF3D7_0709900	Q8IBZ1	PF3D7_0709900	114.434	-2.09404	-4.26941	0.04296	N/A	hydrolase, putative
PF3D7_0523800	Q8I3M7	PF3D7_0523800	475.135	1.61262		0.043522	FVRT1	food vacuole resident transporter 1
PF3D7_1113000	Q8IIN2	PF3D7_1113000	49.895	-2.55958	-5.89534	0.043683	N/A	conserved Plasmodium protein, unknown function
PF3D7_0726100	Q8IBJ5	PF3D7_0726100	5004.46	1.67705		0.044701	N/A	Plasmodium exported protein, unknown function
PF3D7_0903600	PF3D7_0903600	PF3D7_0903600	365.648	-2.157	-4.45988	0.044973	N/A	protein hook, putative
PF3D7_1001100	PF3D7_1001100	PF3D7_1001100	885.803	1.67337		0.044977	ACBP1	acyl-CoA binding protein, isoform 1, ACBP1
PF3D7_1222700	Q8I5I8	PF3D7_1222700	320.135	-2.35005	-5.09844	0.04536	GAP45	glideosome-associated protein 45
PF3D7_1462400	Q8IKL0	PF3D7_1462400	1049.48	1.44942		0.046598	N/A	conserved Plasmodium protein, unknown function
PF3D7_1118700	Q8III1	PF3D7_1118700	226.551	-2.47764	-5.56986	0.04768	MLC-B	myosin light chain B
PF3D7_0113700	Q8I2E1	PF3D7_0113700	1598.24	1.50608		0.047684	HSP40	heat shock protein 40, type II
PF3D7_0831800	A0A143ZVM5	PF3D7_0831800	23703.4	4.84307	28.7017	0.048536	HRP2	histidine-rich protein II
PF3D7_0501400	Q8I486	PF3D7_0501400	16991.4	1.61781		0.048992	FIRA	interspersed repeat antigen
PF3D7_1149600	Q8IHM7	PF3D7_1149600	2511.92	1.48113		0.048992	N/A	DnaJ protein, putative
PF3D7_1003600	Q8IK01	PF3D7_1003600	594.18	-2.32963	-5.02676	0.049148	IMC1c	inner membrane complex protein 1c
PF3D7_0907200	Q8I379	PF3D7_0907200	1479.04	1.59751		0.049148	N/A	GTPase-activating protein, putative
PF3D7_1452000	Q8IKV6	PF3D7_1452000	130.626	-2.5542	-5.87341	0.049148	RON2	rhoptry neck protein 2
PF3D7_1417400	PF3D7_1417400	PF3D7_1417400	116.525	-2.09245	-4.26472	0.049148	EPAC	rap guanine nucleotide exchange factor, putative, pseudogene
PF3D7_1129600	Q8II67	PF3D7_1129600	41.4525	-2.35835	-5.12783	0.049148	N/A	phosphatidylinositol-4-phosphate 5-kinase, putative
PF3D7_0908500	C0H527	PF3D7_0908500	74.5957	-2.43349	-5.40199	0.04931	N/A	conserved Plasmodium protein, unknown function
pfsec23	Q8IB60	PF3D7_0822600	2023.94	1.37183		0.049335	SEC23	protein transport protein SEC23
PF3D7_0501600	Q8I484	PF3D7_0501600	78.5364	-2.35873	-5.1292	0.049335	RAP2	rhoptry-associated protein 2
PF3D7_0730400	Q8IBF5	PF3D7_0730400	71.9025	-2.11399	-4.32887	0.049335	IMP2	IMP1-like protein, putative
PF3D7_0308300	O77324	PF3D7_0308300	24.0926	-2.91383	-7.53618	0.049335	PIC4	PhIL1-interacting candidate PIC4
PF3D7_1469900	Q8IKD8	PF3D7_1469900	155.173	-1.9782		0.049969	MGET	protein MGET
PFF1365c	C6KTB7	PF3D7_0628100	200.543	-2.35843		0.05004
PF3D7_1014900	Q8IJP6	PF3D7_1014900	304.972	-2.36221		0.050527
PF3D7_0212600	O96207	PF3D7_0212600	122.705	-2.05564		0.050527
PF3D7_1007200	Q8IJX0	PF3D7_1007200	87.7574	-2.50277		0.050527
PF3D7_0630800	C6KTE3	PF3D7_0630800	44.3219	-2.73579		0.050527
PF3D7_0702300	Q8IC44	PF3D7_0702300	2037.53	1.53848		0.050834
PF3D7_1440600	A0A144A207	PF3D7_1440600	34.3746	-2.19363		0.051068
PF3D7_0936300	Q8I2F7	PF3D7_0936300	16611.9	1.69561		0.05232
PF3D7_0406500	C0H491	PF3D7_0406500	21089.9	1.4392		0.05232
PF3D7_0415100	Q8I1T7	PF3D7_0415100	203.912	1.37718		0.05232
PF3D7_1019500	PF3D7_1019500	PF3D7_1019500	375.299	-2.10494		0.052411
PF3D7_1472600	Q8IKB2	PF3D7_1472600	61.5841	-2.35515		0.053885
PF3D7_1102800	Q8IIX3	PF3D7_1102800	37588.2	1.62136		0.053932
PF3D7_0804300	Q8IAN9	PF3D7_0804300	497.31	1.59336		0.053932
PF3D7_1247700	A0A144A0Z5	PF3D7_1247700	15.285	-3.56387		0.053932
PF3D7_1213500	Q8I5S0	PF3D7_1213500	18.7638	-2.73859		0.053932
PF3D7_0931300	Q8I2K2	PF3D7_0931300	119.676	1.98561		0.05431
PF3D7_1029900	Q8IJA6	PF3D7_1029900	625.09	-2.49419		0.05496
PF3D7_0617400	C6KT15	PF3D7_0617400	88.6797	1.63681		0.05496
PF3D7_0528400	Q8I3I3	PF3D7_0528400	88.038	-2.74514		0.055109
PF3D7_0810300	C0H4T6	PF3D7_0810300	476.316	-1.95949		0.055167
PF3D7_0704500	C0H4K5	PF3D7_0704500	252.728	-2.38519		0.055167
PF3D7_1119300	Q8IIH4	PF3D7_1119300	1309.52	1.27566		0.055167
PF3D7_0109100	Q8I252	PF3D7_0109100	32.9171	-2.38428		0.055167
PF3D7_1009700	Q8IJU8	PF3D7_1009700	129.148	-2.29987		0.055358
PF3D7_0805500	C0H4R6	PF3D7_0805500	321.161	1.50882		0.055358
PF3D7_0114300	PF3D7_0114300	PF3D7_0114300	14.6531	3.23395		0.055358
PF3D7_1035500	Q8IJ54	PF3D7_1035500	981.534	-2.08947		0.055498
PF3D7_0102800	Q8I2B2	PF3D7_0102800	65.9491	-1.88277		0.05597
PF3D7_0930200	C0H576	PF3D7_0930200	55.6296	-2.55731		0.056584
PF3D7_0930300	Q8I0U8	PF3D7_0930300	5762.43	-2.34431		0.05682
PF3D7_1141800	Q8IHU7	PF3D7_1141800	43.2692	-2.46887		0.05682
PF3D7_0102400	PF3D7_0102400	PF3D7_0102400	20.6682	-2.73026		0.05682
PF3D7_0606500	C6KSR3	PF3D7_0606500	1650.2	1.36764		0.057723
PF3D7_1463500	Q8IKK1	PF3D7_1463500	478.111	1.48416		0.057866
PF3D7_1139100	Q8IHX4	PF3D7_1139100	3192.13	1.71216		0.05837
PF3D7_0831600	A0A143ZVM1	PF3D7_0831600	61.2177	-2.18666		0.058524
PFL2295w	Q8I4V5	PF3D7_1247900	777.361	1.5059		0.058955
PF3D7_1351600	Q8IDI4	PF3D7_1351600	43.6238	-1.99316		0.059046
PF3D7_0601300	PF3D7_0601300	PF3D7_0601300	11.741	3.56422		0.059046
PF3D7_1436600	Q8I719	PF3D7_1436600	134.052	-2.17301		0.059722
PF3D7_0621100	C6KT49	PF3D7_0621100	192.735	-1.90731		0.060073
PF3D7_1324400	Q8IE73	PF3D7_1324400	500.741	1.54251		0.060073
PF3D7_0207900	O96166	PF3D7_0207900	68.0962	-2.68028		0.060073
PF3D7_1037500	Q8IJ32	PF3D7_1037500	28.4659	-2.41818		0.060073
PF3D7_0831400	C0H4Z7	PF3D7_0831400	1539.79	-1.69166		0.060798
PF3D7_1133700	Q8II28	PF3D7_1133700	28083	1.60811		0.061554
PF3D7_1463900	Q8IKJ8	PF3D7_1463900	119.935	-2.26878		0.061554
PF3D7_1301600	Q76NM5	PF3D7_1301600	97.123	5.60551		0.061554
PF3D7_0115700	Q8I2C4	PF3D7_0115700	126.396	5.87184		0.06166
PF3D7_0821100	C0H4W5	PF3D7_0821100	2004.29	1.55799		0.063654
PF3D7_1346500	A0A5K1K8P9	PF3D7_1346500	779.043	1.53343		0.06481
PF3D7_0831700	K7NTP5	PF3D7_0831700	34856.2	1.57597		0.064988
PF3D7_1319100	A0A5K1K970	PF3D7_1319100	276.245	1.61804		0.06547
PF3D7_0219900	O96274	PF3D7_0219900	247.922	1.51656		0.06547
PF3D7_1233200	PF3D7_1233200	PF3D7_1233200	198.993	-2.00676		0.066294
PF3D7_1232500	A0A144A1B9	PF3D7_1232500	180.708	-2.04637		0.066294
PF3D7_0405700	Q8I1X1	PF3D7_0405700	686.172	-1.56528		0.066401
PF3D7_1017100	Q8IJM8	PF3D7_1017100	89.7429	-2.03081		0.066507
PF3D7_1461400	Q8IKL8	PF3D7_1461400	59.4817	-2.23284		0.066507
PF3D7_0626400	C6KTA0	PF3D7_0626400	85.847	-1.93865		0.067105
PF3D7_1239900	Q8I524	PF3D7_1239900	690.982	1.26484		0.06717
PF3D7_0624300	C6KT79	PF3D7_0624300	23.3178	-2.31782		0.067912
PF3D7_1001700	Q8IK19	PF3D7_1001700	2320.65	1.49583		0.068052
PF3D7_1020200	Q8IJK0	PF3D7_1020200	30.3101	-2.7184		0.068052
PF3D7_1014000	A0A143ZXB3	PF3D7_1014000	28.0189	-2.45607		0.068052
PF3D7_1372400	C0H5N0	PF3D7_1372400	17.5101	3.66118		0.068052
PF3D7_1426300	C6S3I1	PF3D7_1426300	62.974	-2.0561		0.06808
PF3D7_0508200	C0H4D2	PF3D7_0508200	75.8705	-2.06537		0.068276
PF3D7_1210400	Q8I5U5	PF3D7_1210400	476.734	1.27993		0.069265
PF3D7_0624800	C6KT84	PF3D7_0624800	6.73189	-5.01279		0.070217
PF3D7_1148900	Q8IHN5	PF3D7_1148900	1011.93	1.54879		0.07038
PF3D7_1018200	C6S3C9	PF3D7_1018200	233.938	-2.19947		0.07038
PF14_0159	Q8ILT5	PF3D7_1416100	541.797	1.4124		0.07038
PF3D7_1429500	Q8ILG9	PF3D7_1429500	238.856	1.61904		0.07038
PF3D7_1239300	Q8I530	PF3D7_1239300	153.129	1.57919		0.07038
PF3D7_1253500	Q8I4Q2	PF3D7_1253500	4.95668	-5.56787		0.07038
PF3D7_1240800	PF3D7_1240800	PF3D7_1240800	5.05584	6.01868		0.07038
PF3D7_1301500	Q8IEJ1	PF3D7_1301500	9.44688	3.84098		0.070816
PF3D7_1026400	Q8IJD7	PF3D7_1026400	34.7258	-2.41952		0.071263
PFL2215w	Q8I4X0	PF3D7_1246200	3042.92	-1.75456		0.071445
PF3D7_0109000	Q8I253	PF3D7_0109000	167.561	-2.25839		0.071509
PF3D7_1442900	Q8IL42	PF3D7_1442900	4456.05	1.39744		0.072475
PF3D7_0713200	A0A143ZWP5	PF3D7_0713200	1521.86	4.70584		0.073571
PF14_0444	Q8IL06	PF3D7_1446700	155.974	-1.74677		0.073571
PF3D7_0623900	C6KT75	PF3D7_0623900	170.004	-1.45674		0.073571
PF3D7_1315300	Q8IEG2	PF3D7_1315300	13.5172	-3.62116		0.074644
PF3D7_0828600	Q8IBB7	PF3D7_0828600	50.4178	-2.2857		0.07487
PF3D7_0109700	Q8I247	PF3D7_0109700	1185.47	1.33617		0.0751
PF3D7_0220100	O96276	PF3D7_0220100	1096.54	1.41247		0.076705
PF3D7_0408000	Q9U0K6	PF3D7_0408000	85.6884	-2.32373		0.076705
PF3D7_0516500	C0H4E1	PF3D7_0516500	53.1354	-1.81217		0.076705
PF3D7_1230300	Q8I5B7	PF3D7_1230300	4.27686	-5.35092		0.078545
PF3D7_1343700	Q8IDQ2	PF3D7_1343700	2430.85	1.384		0.079824
PF3D7_1036000	Q8IJ48	PF3D7_1036000	109.387	-2.42731		0.079824
PF3D7_1337700	Q8IDV6	PF3D7_1337700	59.6394	-2.64321		0.079824
PF3D7_0321400	C0H482	PF3D7_0321400	39.1223	-2.47115		0.079824
PF3D7_0613300	C6KSX6	PF3D7_0613300	117.958	-2.16361		0.08061
PF3D7_1230900	A0A144A2N6	PF3D7_1230900	2905.27	1.38817		0.081456
PF3D7_0610400	C6KSV0	PF3D7_0610400	581.854	-1.76822		0.081456
PF3D7_0301500	O97331	PF3D7_0301500	294.709	1.40199		0.081862
PF3D7_1361800	A0A5K1K8J3	PF3D7_1361800	799.877	-2.23629		0.081879
PF3D7_1114200	Q8IIL9	PF3D7_1114200	849.497	1.42789		0.081879
PF3D7_1127000	Q8II93	PF3D7_1127000	378.722	1.63388		0.081879
PF3D7_1409300	Q8IM03	PF3D7_1409300	143.08	-1.8		0.081879
PF3D7_0902000	C0H513	PF3D7_0902000	244.087	1.41432		0.081879
PF3D7_1230100	Q8I5B9	PF3D7_1230100	8.6645	-4.53963		0.081879
PF3D7_0100100	Q9NFB6	PF3D7_0100100	4.33188	-5.37098		0.082232
PF3D7_1477900	PF3D7_1477900	PF3D7_1477900	10.0119	3.36979		0.082753
PF14_0127	Q8ILW6	PF3D7_1412800	2041.75	1.3461		0.08306
PF3D7_1001200	Q8IK24	PF3D7_1001200	382.983	-1.5422		0.083132
PF3D7_0302500	O77310	PF3D7_0302500	1157.09	-2.08398		0.083488
PF3D7_0918000	Q8I2X3	PF3D7_0918000	889.521	-1.8835		0.083488
PF3D7_1334700	A0A5K1K987	PF3D7_1334700	1283.94	1.40163		0.083488
PF3D7_1464200	Q8IKJ5	PF3D7_1464200	276.231	1.46955		0.083488
PF3D7_1140400	Q8IHW1	PF3D7_1140400	50.5781	-2.36172		0.083488
PF3D7_1446400	Q8IL09	PF3D7_1446400	87.1471	-1.68857		0.083488
PF3D7_0903500	Q8I3B3	PF3D7_0903500	2261.77	1.30619		0.083785
PF3D7_0216000	O96239	PF3D7_0216000	103.221	-2.1473		0.083785
PF3D7_0100400	Q9NFB3	PF3D7_0100400	4.14836	-5.30671		0.083785
PF3D7_1310700	Q8IEK9	PF3D7_1310700	647.001	-2.22025		0.084457
PF3D7_1358700	Q8IDB8	PF3D7_1358700	697.771	1.31588		0.084527
PF3D7_1133400	Q7KQK5	PF3D7_1133400	654.047	-2.29496		0.084677
PF3D7_0902100	Q8I3C7	PF3D7_0902100	39.8807	-2.12233		0.084717
PF3D7_0525000	Q8I3L5	PF3D7_0525000	119.358	-1.50287		0.085039
PF3D7_0625000	PF3D7_0625000	PF3D7_0625000	18.3435	-2.8804		0.085039
PF3D7_0731500	Q8IBE8	PF3D7_0731500	4332.39	-2.13105		0.085113
PF3D7_1136700	PF3D7_1136700	PF3D7_1136700	83.7433	-2.02384		0.085238
PF3D7_1428500	Q8ILH9	PF3D7_1428500	187.89	1.36216		0.085443
PF3D7_1100200	Q8IIZ4	PF3D7_1100200	2243.05	6.18173		0.086102
PF3D7_1410800	Q8ILY7	PF3D7_1410800	49.656	-2.29102		0.087537
PF3D7_0813100	Q8IAW6	PF3D7_0813100	64.9899	-2.1227		0.088103
PF3D7_0803200	Q8IAN2	PF3D7_0803200	231.819	-1.91037		0.088161
PF3D7_0205100	C6S3B0	PF3D7_0205100	140.247	-1.87834		0.088161
PF3D7_0105400	PF3D7_0105400	PF3D7_0105400	37.6179	-2.64117		0.088161
PF3D7_0103800	Q8I2A2	PF3D7_0103800	65.9045	-1.72797		0.088161
PF3D7_1242300	Q8I506	PF3D7_1242300	33.6676	-2.15924		0.088161
PF3D7_0919900	Q8I2V4	PF3D7_0919900	487.703	-1.98131		0.088187
PF3D7_0818800	Q8IB23	PF3D7_0818800	538.809	1.49127		0.088313
PF3D7_0407800	Q9U0K8	PF3D7_0407800	544.836	-2.07898		0.088357
PF3D7_1005100	Q8IJY7	PF3D7_1005100	1022.28	1.3318		0.088464
PF3D7_1216300	Q8I5P4	PF3D7_1216300	847.927	1.36684		0.088525
PF3D7_1303700	Q8IES8	PF3D7_1303700	74.0551	-1.97029		0.088525
PF3D7_0400500	Q8I217	PF3D7_0400500	9.03857	3.76126		0.088525
PF3D7_0713300	PF3D7_0713300	PF3D7_0713300	3283.91	4.56452		0.08884
PF3D7_1021100	Q8IJJ2	PF3D7_1021100	373.365	1.25265		0.08884
PF3D7_0608600	C6KST4	PF3D7_0608600	96.1266	-1.55697		0.08884
PF3D7_1118600	Q8III2	PF3D7_1118600	1524.7	1.26825		0.088895
PF3D7_0911100	Q8I341	PF3D7_0911100	463.821	-2.08125		0.089372
PF3D7_1473900	Q8IK99	PF3D7_1473900	912.578	1.46152		0.089692
PF3D7_0935900	Q8I2G1	PF3D7_0935900	67154	1.47849		0.089801
PF3D7_1246400	Q8I4W8	PF3D7_1246400	371.4	-1.95023		0.089801
PF3D7_0909100	C0H528	PF3D7_0909100	29.3943	-2.54428		0.089801
PF3D7_0501100	PF3D7_0501100	PF3D7_0501100	3016.42	1.35348		0.09023
PF3D7_0418000	C0H4B3	PF3D7_0418000	145.524	-1.53505		0.09023
PF3D7_0731100	Q8IBF1	PF3D7_0731100	10375.4	1.35336		0.090573
PF3D7_1149000	Q8IHN4	PF3D7_1149000	3611.67	-1.37984		0.090573
PF3D7_1459000	Q8IKP1	PF3D7_1459000	4928.68	1.26866		0.090573
PF3D7_0716200	Q8IBT8	PF3D7_0716200	2016.06	1.38164		0.090573
PF3D7_1119900	Q8IIG8	PF3D7_1119900	1502.44	1.32276		0.090573
PF3D7_1218500	Q8I5M3	PF3D7_1218500	1360.25	1.29511		0.090573
PF3D7_1308000	C0H5A5	PF3D7_1308000	141.726	-2.13252		0.090573
PF3D7_1469800	Q8IKD9	PF3D7_1469800	238.907	-1.57965		0.090573
PF3D7_1368700	Q8ID23	PF3D7_1368700	206.852	-1.25907		0.090573
PF3D7_1401900	Q8IM70	PF3D7_1401900	57.1358	-2.08941		0.090573
PF3D7_1200300	Q8I641	PF3D7_1200300	3.74519	5.58324		0.090573
PF3D7_0613900	C6KSY1	PF3D7_0613900	454.944	-1.99175		0.090658
PF3D7_1035600	Q8IJ53	PF3D7_1035600	54.2415	-2.28325		0.091294
PF3D7_1453900	Q8IKT9	PF3D7_1453900	1752.13	1.34431		0.091949
PF3D7_1430300	Q8ILG1	PF3D7_1430300	838.81	1.42137		0.091949
PF3D7_1312800	Q8IEJ4	PF3D7_1312800	247.103	-1.91829		0.091949
PF3D7_1017500	Q8IJM4	PF3D7_1017500	269.582	-1.76629		0.091949
PF3D7_1431900	Q8ILE6	PF3D7_1431900	43.3139	-1.98291		0.091949
PF3D7_0401700	PF3D7_0401700	PF3D7_0401700	364.867	-1.6209		0.092115
PF3D7_1475800	A0A144A7A0	PF3D7_1475800	20.0254	-2.41089		0.09236
PF3D7_0113000	Q9U0N1	PF3D7_0113000	32889.2	1.41042		0.09318
PF3D7_1323800	A0A5K1K8G8	PF3D7_1323800	449.555	1.24248		0.09318
PF3D7_0318500	O77372	PF3D7_0318500	97.0242	-1.96128		0.093613
PF3D7_0609700	C6KSU4	PF3D7_0609700	5372.59	1.36601		0.093858
PF3D7_1001400	Q8IK22	PF3D7_1001400	4003.36	1.38096		0.093858
PF3D7_1372300	A0A143ZZR8	PF3D7_1372300	1151.23	5.60493		0.093858
PF3D7_0209700	O96182	PF3D7_0209700	2021.6	1.29439		0.093858
PF3D7_0215300	O96232	PF3D7_0215300	849.746	1.38207		0.093858
PF3D7_1038400	Q8I6U6	PF3D7_1038400	78.864	-2.08159		0.093858
PF3D7_1445200	Q8IL21	PF3D7_1445200	3050.66	1.32966		0.094263
PF3D7_1039100	PF3D7_1039100	PF3D7_1039100	10.2865	-3.15939		0.094263
PF3D7_1425300	A0A144A3H3	PF3D7_1425300	201.962	-1.67749		0.094279
PF3D7_1128900	A0A143ZYW1	PF3D7_1128900	145.426	-2.22215		0.094286
PF3D7_1013900	Q8IJQ6	PF3D7_1013900	768.852	1.26504		0.094286
PF3D7_0314000	C0H473	PF3D7_0314000	135.051	-1.62442		0.094286
PF3D7_0103700	Q8I2A3	PF3D7_0103700	163.433	-1.342		0.094654
PF3D7_0809700	Q8IAT2	PF3D7_0809700	12.8901	-3.19739		0.094654
PF3D7_0311500	Q9NFE5	PF3D7_0311500	368.654	1.22679		0.094769
PFE0165w	Q8I467	PF3D7_0503400	890.597	-1.80857		0.094852
PF3D7_0103200	Q8I2A8	PF3D7_0103200	711.372	-1.16694		0.094852
PF3D7_0203700	A0A143ZWE8	PF3D7_0203700	2772.37	1.26437		0.096203
PF3D7_0323800	O97306	PF3D7_0323800	1677.05	1.32096		0.096203
PF3D7_1208800	Q8I5W0	PF3D7_1208800	1067.85	1.35189		0.096203
PF3D7_0828800	Q8IBB9	PF3D7_0828800	245.414	-1.93222		0.096203
PF3D7_1356800	Q8IDD4	PF3D7_1356800	173.306	-1.74167		0.096203
PF3D7_0820300	Q8IB38	PF3D7_0820300	1381.16	1.27765		0.096342
PF3D7_1322500	Q8IE90	PF3D7_1322500	188.944	-2.05407		0.096353
PF3D7_0308100	O77322	PF3D7_0308100	171.727	-2.23989		0.096353
PF3D7_0530900	Q8I3F9	PF3D7_0530900	88.043	-2.44951		0.096353
PF3D7_1252100	Q8I4R5	PF3D7_1252100	153.415	-2.14018		0.096475
PF3D7_0423300	Q8IFN3	PF3D7_0423300	86.2957	-2.35811		0.096605
PF3D7_0320800	O97285	PF3D7_0320800	126.437	-1.59077		0.096605
PF3D7_1023400	Q8IJH1	PF3D7_1023400	111.228	-1.6839		0.096605
PF3D7_0806200	C0H4S1	PF3D7_0806200	36.4707	-2.55897		0.096744
PF3D7_0111000	Q8I235	PF3D7_0111000	180.334	-1.81373		0.096756
PF3D7_1246300	Q8I4W9	PF3D7_1246300	1582.86	1.20525		0.096947
PF3D7_0812500	Q8IAW1	PF3D7_0812500	6403.06	1.31492		0.097129
PF3D7_0506900	Q8I433	PF3D7_0506900	300.371	-1.96001		0.097129
PF3D7_1014100	Q8IJQ4	PF3D7_1014100	54.1371	-2.15802		0.097129
PF3D7_1471500	Q8IKC4	PF3D7_1471500	39.4051	-1.99225		0.097129
PF3D7_1351700	A0A5K1K988	PF3D7_1351700	541.562	-1.9252		0.09749
PF3D7_0808200	Q8IAS0	PF3D7_0808200	376.909	-2.0602		0.09749
PF3D7_0414900	C0H4A5	PF3D7_0414900	223.201	-2.11622		0.09749
PF3D7_1320700	Q8IEA7	PF3D7_1320700	182.76	-2.00929		0.09749
PF3D7_1361500	PF3D7_1361500	PF3D7_1361500	93.1095	-2.3109		0.09749
PF3D7_0314900	O97264	PF3D7_0314900	59.0014	-1.78466		0.09749
PF3D7_1027100	Q8IJD2	PF3D7_1027100	2487.65	1.30423		0.097561
PF3D7_0820500	Q8IB40	PF3D7_0820500	1050.37	1.3243		0.097561
PF3D7_1104900	Q8IIV3	PF3D7_1104900	244.175	-1.73772		0.097561
PFL2415w	Q8I4T1	PF3D7_1250300	304.227	-1.3629		0.097561
PF3D7_1359900	A0A5K1K916	PF3D7_1359900	721.197	1.22508		0.097561
PF3D7_1461200	A0A144A2N8	PF3D7_1461200	295.914	1.45079		0.097561
PF3D7_0205800	C6S3B1	PF3D7_0205800	136.509	-1.39817		0.097561
PF3D7_1435200	Q8ILB2	PF3D7_1435200	36.8309	-2.68404		0.097561
PF3D7_0109400	Q8I250	PF3D7_0109400	232.638	-1.31579		0.098025
PF3D7_0935400	Q8I2G6	PF3D7_0935400	155.722	-1.97629		0.098175
PF3D7_1018300	C6S3D0	PF3D7_1018300	1057.8	1.25164		0.098321
PF3D7_0209100	O96176	PF3D7_0209100	622.238	1.17327		0.098321
PF3D7_1235200	Q8I570	PF3D7_1235200	85.4687	-2.32206		0.098321
PF3D7_1477700	Q8IK58	PF3D7_1477700	93.9095	1.66958		0.098321
PF3D7_0204000	O96140	PF3D7_0204000	32.5761	-2.00594		0.098524
PF3D7_0802100	Q8IAM1	PF3D7_0802100	202.009	-1.91122		0.098555
PF3D7_1036400	A0A143ZZD7	PF3D7_1036400	8.94102	-4.59292		0.098636
PF3D7_0806300	C0H4S2	PF3D7_0806300	113.542	-2.15573		0.098676
PF3D7_1004600	Q8IJZ1	PF3D7_1004600	157.29	-1.78199		0.098927
PF3D7_MIT01300	PF3D7_MIT01300	PF3D7_MIT01300	53.839	-1.82791		0.098927
PF3D7_1444200	Q8IL29	PF3D7_1444200	22.7646	-2.62396		0.098927
PF3D7_1209300	Q7KQK4	PF3D7_1209300	685.549	-1.28163		0.099267
PF3D7_1403400	A0A144A137	PF3D7_1403400	85.763	-1.898		0.099267
PF3D7_0403600	C0H488	PF3D7_0403600	56.7891	-1.87792		0.099267
PF3D7_1340800	Q8IDS8	PF3D7_1340800	62.6958	-1.77154		0.099913
PF3D7_0102300	Q8I2B6	PF3D7_0102300	460.406	-1.75278		0.100002
PF3D7_0826900	C0H4Y1	PF3D7_0826900	322.577	-1.46026		0.100002
PF3D7_0501500	Q8I485	PF3D7_0501500	81.9683	-2.35038		0.100002
PF3D7_0324700	PF3D7_0324700	PF3D7_0324700	9.46448	3.4482		0.100002
PF3D7_0900700	Q8I3D9	PF3D7_0900700	6.03272	4.2507		0.100002
PF3D7_1135100	Q8II13	PF3D7_1135100	816.625	1.38459		0.100091
PF3D7_0727900	Q8IBH8	PF3D7_0727900	331.096	1.50944		0.100091
PF3D7_0631200	PF3D7_0631200	PF3D7_0631200	13.5246	2.41054		0.100091
PF3D7_1035400	Q8IJ55	PF3D7_1035400	802.358	-1.89283		0.10092
PF3D7_0413500	Q8I1V2	PF3D7_0413500	148.109	-1.69818		0.101732
PF3D7_0710100	Q8IBY9	PF3D7_0710100	438.92	1.14112		0.101732
PF3D7_0723800	Q8IBL5	PF3D7_0723800	316.779	-1.7684		0.102221
PF3D7_1451300	Q8IKW3	PF3D7_1451300	235.506	-1.54816		0.102221
PF3D7_0723300	Q8IBM0	PF3D7_0723300	74.5014	-1.80919		0.102221
PF3D7_1458700	Q8IKP4	PF3D7_1458700	55.8473	-1.9853		0.102221
PF3D7_1253000	Q8I4Q6	PF3D7_1253000	7886.56	1.3664		0.102724
PF3D7_1426800	Q8ILJ6	PF3D7_1426800	1669.41	1.2121		0.102724
PF3D7_1033800	Q8IJ71	PF3D7_1033800	10.6392	-3.13548		0.102736
PF3D7_0922600	C0H551	PF3D7_0922600	1708.04	1.39783		0.10285
PF3D7_1458600	Q8IKP5	PF3D7_1458600	898.289	1.29594		0.103018
PF3D7_1459400	Q8IKN7	PF3D7_1459400	596.259	1.39276		0.103018
PF3D7_1459200	Q8IKN9	PF3D7_1459200	788.525	1.12973		0.103018
PF3D7_1229800	A0A144A488	PF3D7_1229800	119.197	-1.94039		0.103018
PF3D7_0105700	Q8I284	PF3D7_0105700	178.829	-1.4474		0.103018
PF3D7_1206000	Q8I5Y5	PF3D7_1206000	134.257	-1.72784		0.103018
PF3D7_1455300	Q8IKS5	PF3D7_1455300	97.8731	-1.7206		0.103018
PF3D7_0806600	C0H4S3	PF3D7_0806600	292.898	1.21316		0.103018
PF3D7_1432200	Q8ILE1	PF3D7_1432200	77.3809	-2.10705		0.103291
PF3D7_1036700	A0A143ZZR4	PF3D7_1036700	106.296	-1.55114		0.103291
PF3D7_1011000	Q8IJT5	PF3D7_1011000	52.6883	-1.62498		0.103317
PF3D7_0517300	Q8I3T5	PF3D7_0517300	5903.63	1.18298		0.103493
PF3D7_1221900	Q8I5J4	PF3D7_1221900	3723.89	1.34822		0.103493
PF3D7_0214600	O96226	PF3D7_0214600	559.658	-2.01003		0.103493
PF3D7_1431200	Q8ILF3	PF3D7_1431200	2160.06	1.22934		0.103493
PF3D7_1132800	Q8II36	PF3D7_1132800	376.004	-1.57553		0.103493
PF3D7_0918700	Q8I2W6	PF3D7_0918700	652.266	1.54436		0.103493
PF3D7_1465400	Q8IKI4	PF3D7_1465400	1003.8	1.28902		0.103493
PF3D7_0913800	Q8I314	PF3D7_0913800	101.652	-2.15027		0.103493
PF3D7_1113600	Q8IIM6	PF3D7_1113600	650.335	1.20949		0.103493
PF3D7_0605900	C6KSQ7	PF3D7_0605900	227.649	1.43405		0.103493
PF3D7_0920500	Q8I2U8	PF3D7_0920500	68.121	-1.95828		0.103493
PF3D7_0818100	Q8IB16	PF3D7_0818100	144.641	-2.01322		0.103694
PF3D7_1449200	C6S3J1	PF3D7_1449200	387.494	-3.54262		0.103879
PF3D7_1100100	Q8IIZ5	PF3D7_1100100	219.752	4.66787		0.103879
PF3D7_0929000	Q8I2M0	PF3D7_0929000	527.753	1.23357		0.103879
PF3D7_1232700	A0A144A4C1	PF3D7_1232700	83.0314	-1.79082		0.103879
PF3D7_0707500	Q8IC14	PF3D7_0707500	170.643	1.24888		0.103879
PF3D7_1317900	Q8IED7	PF3D7_1317900	1005.48	1.27301		0.104793
PF3D7_1420000	Q8ILQ0	PF3D7_1420000	1504.47	1.18665		0.104822
PF3D7_1007300	Q8IJW9	PF3D7_1007300	16.2501	-2.98282		0.105222
PF3D7_1036500	Q8IJ43	PF3D7_1036500	204.003	-1.8415		0.107393
PF3D7_0305300	O97238	PF3D7_0305300	2377.86	1.16401		0.1078
PF3D7_0214200	O96222	PF3D7_0214200	242.085	-1.40094		0.1078
PF3D7_1355300	Q8IDE8	PF3D7_1355300	269.616	1.45234		0.1078
PF3D7_1461600	Q8IKL7	PF3D7_1461600	3445.04	1.21553		0.108122
PF3D7_1421100	Q8ILN9	PF3D7_1421100	325.926	1.42843		0.108513
PF3D7_0310000	Q9NLA7	PF3D7_0310000	56.1504	-1.80266		0.108513
PF3D7_0407900	Q9U0K7	PF3D7_0407900	350.92	-1.42094		0.108552
PF3D7_1143700	Q8IHS8	PF3D7_1143700	29.8424	-2.03454		0.10893
PF3D7_1016600	C6S3C7	PF3D7_1016600	119.578	1.62836		0.109816
PF3D7_1419900	Q8ILQ1	PF3D7_1419900	225.486	1.24911		0.110155
PF3D7_1477000	PF3D7_1477000	PF3D7_1477000	32.7034	2.01546		0.110155
PF3D7_0316000	O77394	PF3D7_0316000	36.1068	-1.92321		0.111
PF3D7_1236400	Q8I559	PF3D7_1236400	530.493	1.32252		0.111037
PF3D7_0424500	Q8IFM1	PF3D7_0424500	1324.44	1.29712		0.111355
PF3D7_1013100	Q8IJR4	PF3D7_1013100	1693.8	1.22247		0.111355
PF3D7_1302600	Q8I701	PF3D7_1302600	613.054	1.243		0.111355
PF3D7_1030000	Q8IJA5	PF3D7_1030000	686.034	1.12341		0.111355
PF3D7_1127600	Q8II87	PF3D7_1127600	160.206	-1.25275		0.111704
PF3D7_0622900	C6KT65	PF3D7_0622900	3427.12	1.24743		0.111918
PF3D7_1036800	Q8IJ40	PF3D7_1036800	94.4801	-1.59154		0.111918
PF3D7_1204900	Q8I5Z6	PF3D7_1204900	53.4919	-1.85596		0.111918
PF3D7_1327300	A0A5K1K8E0	PF3D7_1327300	1516.23	-1.30538		0.112358
PF3D7_1121100	Q8IIF6	PF3D7_1121100	1755.6	1.14372		0.112358
PF3D7_1350300	A0A5K1K8F9	PF3D7_1350300	936.69	1.23838		0.112358
PF3D7_0935700	Q8I2G3	PF3D7_0935700	682.002	1.25159		0.112358
PF3D7_0935390	PF3D7_0935390	PF3D7_0935390	168.658	-1.91032		0.112358
PF3D7_1200900	Q8I636	PF3D7_1200900	525.049	1.29483		0.112358
PF3D7_0407300	Q9U0L3	PF3D7_0407300	408.368	1.25324		0.112358
PF3D7_0920700	Q8I2U6	PF3D7_0920700	98.5774	-1.65771		0.112358
PF3D7_0532800	PF3D7_0532800	PF3D7_0532800	13.8693	-2.51524		0.112358
RPL18	Q6LFD5	PF3D7_0613400	157.156	-1.67059		0.112458
PF3D7_0309300	O77329	PF3D7_0309300	708.826	1.20575		0.112471
PF3D7_0619200	C6KT32	PF3D7_0619200	2817.19	1.13416		0.112881
PF3D7_1470000	C6S3K2	PF3D7_1470000	33.7488	-1.81922		0.114083
PF3D7_0424400	Q8IFM2	PF3D7_0424400	91.0542	1.47239		0.114688
PF3D7_0216700	PF3D7_0216700	PF3D7_0216700	1353.6	-1.49902		0.115351
PF12	C6KSX0	PF3D7_0612700	127.792	-1.46159		0.115351
PF3D7_1451200	Q8IKW4	PF3D7_1451200	8321.21	1.15874		0.115544
PF3D7_1136600	Q8IHZ8	PF3D7_1136600	5016.46	1.23794		0.115544
PF3D7_0902500	Q8I3C3	PF3D7_0902500	1982.13	1.40453		0.115544
PF3D7_0401800	Q8I207	PF3D7_0401800	396.745	-1.43364		0.115544
PF3D7_0522400	C0H4F8	PF3D7_0522400	279.733	-1.46128		0.115544
PF3D7_0714200	Q8IBV5	PF3D7_0714200	1021.75	1.16735		0.115544
PF3D7_0404700	Q8I1Y2	PF3D7_0404700	161.533	-1.76115		0.115544
PF3D7_0731400	PF3D7_0731400	PF3D7_0731400	300.384	-1.28061		0.115544
PF3D7_1436200	Q8ILA2	PF3D7_1436200	140.371	-1.64989		0.115544
PF3D7_1224500	Q8I5H2	PF3D7_1224500	135.496	-1.43836		0.115544
PF3D7_1122600	Q8IIE0	PF3D7_1122600	28.4517	-2.02203		0.115544
PF3D7_0919200	Q8I2W1	PF3D7_0919200	64.4937	-1.9448		0.115817
PF3D7_1433500	Q8ILC8	PF3D7_1433500	5138.32	1.30298		0.115977
PF3D7_1138700	Q8IHX8	PF3D7_1138700	1327.07	1.11254		0.115977
PF3D7_1338900	A0A5K1K8V9	PF3D7_1338900	198.002	-1.55519		0.115977
PF3D7_0216900	O96248	PF3D7_0216900	54.4996	-1.55148		0.116632
Pfn	Q8I2J4	PF3D7_0932200	705.117	-1.31415		0.116651
PF3D7_1201500	Q8I630	PF3D7_1201500	997.385	1.24489		0.116651
PF3D7_1029200	Q8IJB3	PF3D7_1029200	388.326	1.42364		0.116651
PF3D7_0923000	Q8I2S6	PF3D7_0923000	387.253	1.25395		0.116651
PF3D7_1373500	Q8ID12	PF3D7_1373500	142.987	5.3398		0.116782
PF3D7_1023300	Q8IJH2	PF3D7_1023300	56.4714	-1.55427		0.116782
PF3D7_0220000	O96275	PF3D7_0220000	11881.7	1.19459		0.117063
PF3D7_1307900	Q8IEN6	PF3D7_1307900	36.5449	-2.42008		0.117063
PF3D7_1025400	Q8IJF0	PF3D7_1025400	99.8653	-2.05066		0.11712
PF3D7_1021800	A0A143ZXM2	PF3D7_1021800	1050.8	-1.7665		0.117142
PF3D7_1236900	Q8I554	PF3D7_1236900	89.7341	-1.59683		0.117142
PF3D7_0525700	Q8I3K8	PF3D7_0525700	64.5793	-1.73329		0.117142
PF3D7_1401200	Q8IM76	PF3D7_1401200	934.524	-1.27342		0.117943
PF3D7_0816000	Q8IAZ7	PF3D7_0816000	1201.63	1.1996		0.117943
PF3D7_0104200	Q8I298	PF3D7_0104200	228.568	-1.1135		0.117943
PF3D7_1353100	Q8IDG9	PF3D7_1353100	3371.27	1.44323		0.118029
PF3D7_0819800	Q8IB33	PF3D7_0819800	157.78	-1.5535		0.118029
PF3D7_0803400	Q8IAN4	PF3D7_0803400	692.251	-1.88009		0.119251
PF3D7_1241800	Q8I511	PF3D7_1241800	3248.9	1.16		0.119407
PF3D7_0935800	Q8I2G2	PF3D7_0935800	625.778	-2.00471		0.119675
PF3D7_1120400	Q8IIG3	PF3D7_1120400	643.014	1.18335		0.119675
PF3D7_1301900	Q8IEI7	PF3D7_1301900	3.63821	5.55704		0.119675
PF3D7_0402300	B9ZSJ4	PF3D7_0402300	621.964	-1.85904		0.119698
PF3D7_0526500	Q8I3K0	PF3D7_0526500	1073.86	1.25352		0.119698
PF3D7_1251300	Q8I4S1	PF3D7_1251300	90.5499	-1.50533		0.119976
PF3D7_1304000	C0H598	PF3D7_1304000	162.244	-1.73042		0.120219
PF3D7_1348600	A0A5K1K8Z2	PF3D7_1348600	18.495	-2.82216		0.120419
PF3D7_1138500	Q8IHY0	PF3D7_1138500	2675.93	1.12565		0.120491
PF3D7_1209400	Q8I5V5	PF3D7_1209400	202.364	-1.44713		0.120491
PF3D7_1140800	Q8IHV7	PF3D7_1140800	650.577	1.22706		0.120491
PF3D7_0112900	Q9U0N2	PF3D7_0112900	472.109	1.22993		0.120491
PF3D7_1421900	Q8ILN2	PF3D7_1421900	85.8442	-1.73735		0.120491
PF3D7_1463400	Q8IKK2	PF3D7_1463400	716.608	1.21754		0.120717
PF3D7_MIT02000	PF3D7_MIT02000	PF3D7_MIT02000	123.381	-1.7639		0.120717
PF3D7_1432400	Q8ILD9	PF3D7_1432400	43.9792	-1.9845		0.120717
PF3D7_0416000	Q8I1S7	PF3D7_0416000	670.187	-1.04333		0.120979
PF3D7_1356100	Q8IDE1	PF3D7_1356100	230.316	-1.82142		0.120979
PF3D7_1404600	PF3D7_1404600	PF3D7_1404600	63.4787	-1.51592		0.120979
PF3D7_0522500	C0H4F9	PF3D7_0522500	35.1475	-1.83276		0.120979
PF3D7_0321300	O97288	PF3D7_0321300	25.3507	-2.22481		0.121077
PF3D7_0711100	Q8IBX9	PF3D7_0711100	148.025	1.43653		0.121089
PF3D7_1235300	Q8I569	PF3D7_1235300	17421.4	1.16219		0.121298
PF13_0233	Q8IDR3	PF3D7_1342600	1683.65	-1.79562		0.121298
PF3D7_1142100	Q8IHU4	PF3D7_1142100	5390.7	1.2739		0.121298
PF3D7_0519700	C0H4F1	PF3D7_0519700	3621.08	1.26774		0.121298
PF3D7_1251600	Q8I4R8	PF3D7_1251600	1780.37	1.16795		0.121298
SETVS	Q8IE95	PF3D7_1322100	1791.77	1.12857		0.121298
PF3D7_0819500	C0H4W0	PF3D7_0819500	344.808	-1.38946		0.121298
PF3D7_1135400	Q8II11	PF3D7_1135400	776.536	1.21706		0.121298
PF3D7_1404500	Q8IM49	PF3D7_1404500	886.387	1.13499		0.121298
PF3D7_1345600	A0A5K1K8Y1	PF3D7_1345600	83.3312	-1.98578		0.121298
PF3D7_0519300	Q8I0W6	PF3D7_0519300	136.132	-1.42274		0.121298
PF3D7_0515400	C0H4E0	PF3D7_0515400	55.8513	-2.31185		0.121298
PF3D7_0311300	O77353	PF3D7_0311300	267.121	-1.69532		0.12209
PF3D7_0936400	Q8I2F6	PF3D7_0936400	784.308	1.22939		0.12209
PF3D7_1340900	Q8IDS7	PF3D7_1340900	2567.86	1.19638		0.122403
PF3D7_0404000	Q8I1Y9	PF3D7_0404000	19.8428	-2.36334		0.122403
PF3D7_0606000	C6KSQ8	PF3D7_0606000	5166.01	1.18963		0.122587
PF3D7_1470200	Q8IKD6	PF3D7_1470200	523.577	1.25901		0.123107
PF3D7_0803300	Q8IAN3	PF3D7_0803300	65.0746	-1.65898		0.123336
PF3D7_0321500	O97289	PF3D7_0321500	371.073	-1.21855		0.123897
PF3D7_0931900	C0H582	PF3D7_0931900	16.2025	-2.35107		0.123897
PF3D7_1025900	A0A143ZYA5	PF3D7_1025900	461.391	-1.67106		0.124438
PF3D7_1319600	A0A5K1K8F4	PF3D7_1319600	47.0921	-1.97064		0.125032
PF3D7_1447200	Q8IL00	PF3D7_1447200	2452.65	1.08023		0.125038
PF3D7_1419100	Q8ILQ9	PF3D7_1419100	1567.37	1.17351		0.125038
PF3D7_1201000	Q8I635	PF3D7_1201000	13396.8	-1.32902		0.125052
PF3D7_1006500	Q8IJX6	PF3D7_1006500	76.3599	-1.3848		0.125052
PF3D7_1001600	Q8IK20	PF3D7_1001600	1415.81	-1.89592		0.125133
PF14_0076	Q7KQM4	PF3D7_1407900	4498.91	1.20085		0.125133
PF3D7_1004300	Q8IJZ4	PF3D7_1004300	4092.08	1.19432		0.125133
PF3D7_1016700	Q8IJN1	PF3D7_1016700	1637.25	1.25897		0.125133
PF3D7_1418900	C6S3H8	PF3D7_1418900	1858.65	1.20174		0.125133
PF3D7_1343300	A0A5K1K996	PF3D7_1343300	834.729	-1.18669		0.125133
PF3D7_1210600	Q8I5U3	PF3D7_1210600	1699.04	1.05661		0.125133
PF3D7_1228700	Q8I5D1	PF3D7_1228700	233.155	-1.70661		0.125133
PF3D7_1119200	A0A143ZYQ2	PF3D7_1119200	899.854	1.10347		0.125133
PF3D7_1221000	Q8I5K3	PF3D7_1221000	247.108	-1.50227		0.125133
PF3D7_0611600	C6KSW1	PF3D7_0611600	161.485	-1.76311		0.125133
PF3D7_1215300	Q8I5Q3	PF3D7_1215300	258.044	-1.34526		0.125133
PF3D7_0216600	O96245	PF3D7_0216600	738.047	1.14992		0.125133
PF3D7_1334100	A0A5K1K8V1	PF3D7_1334100	195.994	-1.27234		0.125133
PF3D7_0309800	O77335	PF3D7_0309800	373.457	1.18359		0.125133
PF3D7_0915700	Q8I2Z5	PF3D7_0915700	53.9072	-2.0498		0.125133
PF3D7_1005900	Q8IJY1	PF3D7_1005900	60.6349	-1.71699		0.125133
PF3D7_0308700	O77326	PF3D7_0308700	38.4038	-2.13592		0.125133
PF3D7_0512300	Q8I3Y3	PF3D7_0512300	211.81	1.20764		0.125133
PF3D7_1247800	Q8I0V1	PF3D7_1247800	32.8496	-2.38516		0.125133
PF3D7_1425400	Q8ILK9	PF3D7_1425400	61.6559	-1.78753		0.125133
PF3D7_0816700	C0H4V0	PF3D7_0816700	44.8029	-1.63681		0.125133
PF3D7_1138100	Q8IHY3	PF3D7_1138100	44.9523	1.72747		0.125133
PF3D7_1122300	Q8IIE3	PF3D7_1122300	115.157	1.46405		0.125189
PF3D7_1401400	Q7KQM5	PF3D7_1401400	10268.4	1.29409		0.125421
PF3D7_0424700	Q8IFL9	PF3D7_0424700	11069.1	1.15855		0.125421
PF3D7_1329500	A0A5K1K8J1	PF3D7_1329500	7531.96	1.24036		0.125421
PF3D7_0607600	C6KSS4	PF3D7_0607600	339.315	-1.66423		0.125421
PF3D7_1035700	Q8IJ52	PF3D7_1035700	221.22	-1.90052		0.125421
PF3D7_1250600	Q8I4S8	PF3D7_1250600	812.242	1.09691		0.125421
PF3D7_0415500	Q8I1T2	PF3D7_0415500	648.47	1.1675		0.125421
PF3D7_1224100	Q8I5H6	PF3D7_1224100	116.933	-1.72561		0.125421
PF3D7_0703400	A0A5K1K8R2	PF3D7_0703400	141.218	-1.33155		0.125421
PF3D7_0317100	C0H478	PF3D7_0317100	42.4195	-1.6483		0.125421
PF3D7_0519000	Q8I3R9	PF3D7_0519000	52.5892	-1.60532		0.125421
PF3D7_1341800	Q8IDS1	PF3D7_1341800	21.5783	-2.37657		0.125421
PF3D7_0932000	C0H583	PF3D7_0932000	110.939	-1.71847		0.125463
MAL8P1.12	Q8IBB8	PF3D7_0828700	31.6189	-2.21297		0.125739
PF3D7_0929600	Q8I2L4	PF3D7_0929600	21.8692	-2.40369		0.126025
PF3D7_1118300	Q8III5	PF3D7_1118300	5059.1	1.12978		0.126171
PF3D7_1140200	Q8IHW3	PF3D7_1140200	1290.15	-1.16627		0.126171
PF3D7_0303200	O77317	PF3D7_0303200	666.722	-1.42282		0.126171
PF3D7_0508100	Q8I422	PF3D7_0508100	319.254	-2.00711		0.126171
PF3D7_0213900	O96219	PF3D7_0213900	1029.4	1.22467		0.126171
PF3D7_0218400	O96264	PF3D7_0218400	1001.83	1.19808		0.126171
PF3D7_0208000	O96167	PF3D7_0208000	178.203	-1.92047		0.126171
PF3D7_1019100	Q8IJL1	PF3D7_1019100	162.637	-1.87366		0.126171
PF3D7_1231200	Q8I5A8	PF3D7_1231200	68.2113	-1.94629		0.126171
PF3D7_1024400	Q8IJG1	PF3D7_1024400	33.1294	-2.34926		0.126171
PF3D7_0811700	Q8IAV2	PF3D7_0811700	13.5103	-2.99287		0.126171
PF3D7_1401700	Q8IM72	PF3D7_1401700	8.49944	-3.06187		0.126171
PF3D7_0306000	Q9NLB3	PF3D7_0306000	32.4815	-1.82614		0.126986
PF3D7_1031800	Q8IJ87	PF3D7_1031800	82.3046	-1.732		0.127209
PF3D7_1102700	Q7KQK8	PF3D7_1102700	10194.8	1.22564		0.127396
PF3D7_1253200	Q8I4Q4	PF3D7_1253200	519.765	1.20725		0.127396
PF3D7_1136200	Q8II02	PF3D7_1136200	102.03	-2.0606		0.127396
PF3D7_1132600	Q8II38	PF3D7_1132600	732.495	1.08101		0.127396
PF3D7_MIT03600	PF3D7_MIT03600	PF3D7_MIT03600	61.3233	-1.87595		0.127396
PF3D7_0810900	PF3D7_0810900	PF3D7_0810900	34.4337	-2.10249		0.127396
PF3D7_0615200	C6KSZ3	PF3D7_0615200	19.4426	-2.46789		0.127453
PF3D7_0323700	O97303	PF3D7_0323700	2608.18	1.04806		0.127542
PF3D7_1445100	Q8IL22	PF3D7_1445100	518.923	1.28018		0.127542
PF3D7_1204100	Q8I605	PF3D7_1204100	188.852	-1.18606		0.127542
PF3D7_1442500	Q8IL46	PF3D7_1442500	124.403	-1.30454		0.127542
PF3D7_0211400	Q7KWI9	PF3D7_0211400	18.6256	-2.2605		0.127542
PF3D7_1450400	Q8IKX2	PF3D7_1450400	2243.78	1.12812		0.127603
PF3D7_1010300	Q8IJU2	PF3D7_1010300	1405.51	1.19772		0.127603
PF3D7_0933000	Q8I0W1	PF3D7_0933000	1136.53	1.06354		0.127603
PF3D7_1009800	Q8IJU7	PF3D7_1009800	589.654	1.20718		0.127603
PF3D7_MIT04000	PF3D7_MIT04000	PF3D7_MIT04000	722.377	-1.24161		0.127671
PF3D7_0612200	C6KSW6	PF3D7_0612200	415.341	-1.68968		0.127792
PF3D7_0200100	O96108	PF3D7_0200100	415.923	5.75219		0.127792
PF3D7_0212900	O96210	PF3D7_0212900	213.013	-1.66068		0.127792
PF3D7_1344300	C0H5H1	PF3D7_1344300	110.309	-1.6157		0.127792
PF3D7_0726700	Q8IBI9	PF3D7_0726700	72.3197	-1.54017		0.127792
PF3D7_1253400	Q8I0X2	PF3D7_1253400	23.3369	-1.93867		0.127792
PF3D7_1312000	Q8I6Z9	PF3D7_1312000	19.4586	-2.07818		0.127792
PF3D7_0322200	O97294	PF3D7_0322200	14.6494	-2.28792		0.127792
PF3D7_0716300	Q8IBT7	PF3D7_0716300	2191.79	-1.27313		0.128619
PF3D7_1251100	Q8I4S3	PF3D7_1251100	479.357	1.14665		0.128619
PF3D7_0825500	Q8IB88	PF3D7_0825500	3062.78	1.14668		0.129053
PF3D7_1405900	A0A144A153	PF3D7_1405900	3067.95	1.12085		0.129053
PF3D7_1227800	Q8I5E0	PF3D7_1227800	2267.88	1.19386		0.129053
PF3D7_1364200	A0A5K1K9A0	PF3D7_1364200	1535.5	1.11909		0.129053
PF3D7_1340700	C0H5G2	PF3D7_1340700	119.443	-1.54076		0.129053
PF3D7_1349600	A0A5K1K8Z5	PF3D7_1349600	179.202	-1.42255		0.129053
PF3D7_0417600	Q8I1R1	PF3D7_0417600	39.0014	-2.34796		0.129053
PF3D7_1003000	Q8IK06	PF3D7_1003000	42.5735	-2.06936		0.129053
PF3D7_0307700	O97255	PF3D7_0307700	811.742	-1.39381		0.129169
PF3D7_0524100	Q8I3M4	PF3D7_0524100	1467.69	1.05139		0.129169
PF3D7_0813000	A0A5K1K7Z9	PF3D7_0813000	1070.27	1.08502		0.129169
PF3D7_1472200	A0A144A4T0	PF3D7_1472200	6171.68	1.10916		0.129989
PF3D7_0722500	Q8IBM8	PF3D7_0722500	1189.16	1.17163		0.129989
PF3D7_1304500	Q8IES0	PF3D7_1304500	247.021	-1.42282		0.129989
PF3D7_0710700	Q8IBY3	PF3D7_0710700	2168.66	1.06471		0.130223
PF3D7_0403900	Q8I1Z0	PF3D7_0403900	51.1919	-1.85398		0.130223
PF3D7_1310200	C0H5A9	PF3D7_1310200	14.6245	-2.65087		0.130223
PF3D7_0610500	C6KSV1	PF3D7_0610500	759.773	-1.24429		0.130542
PF3D7_MIT01200	PF3D7_MIT01200	PF3D7_MIT01200	26.1995	-2.19629		0.130554
PF3D7_1406600	Q8IM28	PF3D7_1406600	298.264	-1.36939		0.130603
SERA	Q9TY95	PF3D7_0207600	3520.11	-1.94597		0.131045
PF3D7_1025000	Q8IJF4	PF3D7_1025000	2248.84	1.04795		0.131045
PF3D7_0410700	Q9U0I1	PF3D7_0410700	393.453	-1.56195		0.131045
PF3D7_1451700	Q8IKV9	PF3D7_1451700	70.6974	-2.11242		0.131045
PF3D7_0612400	C0H4H4	PF3D7_0612400	25.0986	-2.08156		0.131045
PF3D7_1210900	Q8I5U1	PF3D7_1210900	28.123	-2.10641		0.131045
PF3D7_1143600	Q8IHT0	PF3D7_1143600	19.5574	-2.37474		0.131045
PF3D7_1122700	Q8IID6	PF3D7_1122700	20.4072	-2.04864		0.131045
PF3D7_0624600	C6KT82	PF3D7_0624600	12830.6	1.12393		0.131251
PF3D7_0420100	Q8I1N8	PF3D7_0420100	1587.59	1.07538		0.131251
PF3D7_1472000	Q8IKB8	PF3D7_1472000	354.342	1.1451		0.131349
PF3D7_0715200	Q8IBU8	PF3D7_0715200	200.017	-1.65496		0.131593
PF3D7_0414700	Q8I1U1	PF3D7_0414700	141.215	-1.28687		0.131593
PF3D7_0202700	O96130	PF3D7_0202700	64.3114	-1.49131		0.131593
PF3D7_0818700	C0H4V8	PF3D7_0818700	1629.22	1.08301		0.131771
PF3D7_0203200	C6S3A8	PF3D7_0203200	209.52	1.23384		0.131886
PF3D7_0501300	Q8I487	PF3D7_0501300	29858.7	1.11019		0.132669
PF3D7_0201800	O96123	PF3D7_0201800	4493.92	1.22581		0.132669
PF3D7_1361100	C0H5J6	PF3D7_1361100	4115.62	1.12893		0.132669
PF3D7_1022600	Q8IJH9	PF3D7_1022600	2716.09	1.12356		0.132669
PF3D7_0423400	Q8IFN2	PF3D7_0423400	35.4563	-2.25915		0.132669
PF3D7_0425400	Q8IFL1	PF3D7_0425400	1334.42	1.31781		0.132692
PF3D7_0609100	C6KST8	PF3D7_0609100	799.946	1.10193		0.132692
PF3D7_0804800	Q8I6S4	PF3D7_0804800	767.662	1.08762		0.132692
CyRPA	Q8IFM8	PF3D7_0423800	75.0848	-1.55586		0.132692
PF3D7_1105200	Q8IIV0	PF3D7_1105200	15.026	-2.05429		0.132692
PF3D7_0906000	C0H520	PF3D7_0906000	170.865	-1.30386		0.132764
PF3D7_0313600	O77337	PF3D7_0313600	252.085	-1.54201		0.132956
PF3D7_1474400	Q8IK94	PF3D7_1474400	105.066	-1.57893		0.132956
PF3D7_1020400	Q8IJJ8	PF3D7_1020400	366.258	1.15778		0.132956
PF3D7_0821400	Q8IB48	PF3D7_0821400	319.336	1.10275		0.132956
PF45/48	Q8I6T1	PF3D7_1346700	16.7776	-2.29224		0.132956
PF3D7_1246900	Q8I4W3	PF3D7_1246900	73.7302	-1.56909		0.133184
PF3D7_1136400	Q8II00	PF3D7_1136400	2326.77	1.10227		0.133229
PF3D7_1011900	Q8IJS6	PF3D7_1011900	150.449	-1.19963		0.133327
PF3D7_1319300	Q8IEC3	PF3D7_1319300	1908.73	1.21116		0.133354
PF3D7_0301800	O97332	PF3D7_0301800	860.29	1.26719		0.133354
PF3D7_0518600	Q8I3S4	PF3D7_0518600	266.207	-1.37328		0.133354
PF3D7_1012600	Q8IJR9	PF3D7_1012600	2344.24	1.14128		0.133478
PF3D7_1019600	Q8IJK6	PF3D7_1019600	75.3757	-1.77573		0.133638
PF3D7_0221200	Q8I652	PF3D7_0221200	337.513	-1.15281		0.133759
PF3D7_1021500	Q8IJI8	PF3D7_1021500	839.818	1.09275		0.133913
PF3D7_0827300	Q8IBA5	PF3D7_0827300	736.404	1.10069		0.13397
PF3D7_1359600	A0A5K1K8U0	PF3D7_1359600	1864.33	-1.43599		0.134194
PF3D7_0207000	Q7KWJ2	PF3D7_0207000	473.636	-1.61662		0.134194
PF3D7_1417500	Q8ILS0	PF3D7_1417500	1268.07	1.13612		0.134194
PF3D7_0828200	Q8IBB3	PF3D7_0828200	577.117	-1.1396		0.134473
PF3D7_1231300	Q8I5A7	PF3D7_1231300	8.49606	-3.27133		0.135082
PF3D7_1211700	Q8I5T4	PF3D7_1211700	674.006	-1.61408		0.13539
PF3D7_1338700	A0A5K1K8M0	PF3D7_1338700	209.668	-1.48605		0.13539
PF3D7_1225300	Q8I5G4	PF3D7_1225300	804.999	1.08509		0.135578
PF3D7_1024000	Q8IJG5	PF3D7_1024000	231.49	-1.14682		0.135592
PF3D7_1103800	Q8IIW4	PF3D7_1103800	1750.14	-1.18491		0.136006
PF3D7_1313800	C0H5B3	PF3D7_1313800	2421.67	1.20267		0.136006
PF3D7_0814300	Q8IAX9	PF3D7_0814300	863.013	1.16887		0.136006
PF3D7_0313000	O77363	PF3D7_0313000	469.998	1.09957		0.136006
PF3D7_0701700	Q8IC50	PF3D7_0701700	3.6232	4.52796		0.136006
PF3D7_1232200	Q8I5A0	PF3D7_1232200	47.3697	-1.41301		0.136096
PF3D7_1224300	Q8I5H4	PF3D7_1224300	61793.6	1.12654		0.136231
PF3D7_0322100	C0H484	PF3D7_0322100	976.547	1.17306		0.136499
PF3D7_0530300	C0H4G8	PF3D7_0530300	91.8862	-1.89278		0.136502
PF3D7_MIT03800	PF3D7_MIT03800	PF3D7_MIT03800	74.8698	-1.69481		0.136631
PF3D7_0707200	C0H4L9	PF3D7_0707200	148.016	-1.50814		0.13698
PF3D7_1416500	Q8ILT0	PF3D7_1416500	129.42	1.33521		0.13698
PF3D7_0629800	C6KTD3	PF3D7_0629800	1577.71	1.08757		0.137289
PF3D7_0914100	C0H536	PF3D7_0914100	283.27	-1.57724		0.137289
PF3D7_0615800	C6KSZ9	PF3D7_0615800	184.606	-1.18197		0.137289
PF3D7_1345500	Q8IDP1	PF3D7_1345500	33.4789	-1.64166		0.137289
PF3D7_1370300	C0H5L9	PF3D7_1370300	11288.4	1.25117		0.137657
PF3D7_0217000	O96251	PF3D7_0217000	40.845	-1.73786		0.137657
PF3D7_1218300	Q8I5M5	PF3D7_1218300	443.904	1.09018		0.137678
PF3D7_0922100	Q8I2T2	PF3D7_0922100	12198.2	1.14457		0.138171
PF3D7_0627100	C6KTA7	PF3D7_0627100	2754.29	1.11725		0.138171
PF3D7_1458000	Q8I6V0	PF3D7_1458000	1541.42	1.1251		0.138171
PF3D7_1035800	Q8IJ50	PF3D7_1035800	762.054	1.43971		0.138171
PF3D7_0218700	O96267	PF3D7_0218700	1322.44	1.09099		0.138171
PF3D7_1458500	Q8IKP6	PF3D7_1458500	317.567	-1.31386		0.138171
PF92	Q8ID66	PF3D7_1364100	218.875	-1.50994		0.138171
PF3D7_0615000	C6KSZ1	PF3D7_0615000	255.949	1.22445		0.138171
PF3D7_1417300	Q8ILS3	PF3D7_1417300	54.2792	-1.64793		0.138171
PF3D7_0523300	Q8I3N1	PF3D7_0523300	68.9416	-1.38534		0.138171
PF3D7_1342500	Q8IDR4	PF3D7_1342500	35.5467	-1.73677		0.138171
PF3D7_0903800	Q8I3B1	PF3D7_0903800	16.2799	-2.47841		0.138171
PF3D7_0620700	C6KT47	PF3D7_0620700	34.9759	-1.98041		0.138245
PF3D7_1472100	Q8IKB7	PF3D7_1472100	809.347	1.0849		0.138836
PF3D7_0320400	O97283	PF3D7_0320400	45.1911	-1.54917		0.138836
PF3D7_0930100	C0H575	PF3D7_0930100	99.2727	-1.19534		0.139005
PF3D7_0803100	Q8IAN1	PF3D7_0803100	4313.3	1.0868		0.139883
PF3D7_1323600	Q8IE81	PF3D7_1323600	94.3452	-1.32425		0.139883
PF3D7_1230700	Q8I5B3	PF3D7_1230700	3954.39	1.02303		0.139899
PF3D7_0730500	Q8IBF4	PF3D7_0730500	480.46	-1.4011		0.139899
PF3D7_1450100	Q8IKX4	PF3D7_1450100	1230.32	1.1523		0.139899
PF3D7_0318600	O77371	PF3D7_0318600	873.676	1.08241		0.139899
PF3D7_0507200	Q8I430	PF3D7_0507200	122.073	-1.424		0.139899
PF3D7_0506400	A0A5K1K846	PF3D7_0506400	4.16208	-4.29688		0.139899
PF3D7_1475600	Q8IK82	PF3D7_1475600	1292.99	1.12048		0.139908
PF3D7_1133900	Q8II26	PF3D7_1133900	1306.91	1.00937		0.139983
PF3D7_1449100	Q8IKY3	PF3D7_1449100	151.825	-1.7157		0.139983
MSA2	P50498	PF3D7_0206800	1570.89	-1.3572		0.140024
PF3D7_1024300	Q8IJG2	PF3D7_1024300	98.4002	-1.75778		0.140024
PF3D7_0602800	C6KSM8	PF3D7_0602800	102.62	1.35113		0.140024
PF3D7_0214100	O96221	PF3D7_0214100	5791.99	1.08383		0.140495
RIPR	O97302	PF3D7_0323400	319.464	-1.79215		0.140495
PF3D7_1352200	A0A5K1K8T1	PF3D7_1352200	1289.45	1.13932		0.140495
PF3D7_0719400	Q8IBQ8	PF3D7_0719400	365.232	-1.36181		0.140495
PF3D7_0526300	Q8I3K2	PF3D7_0526300	543.558	1.24058		0.140495
PF3D7_0625400	C6KT90	PF3D7_0625400	479.399	1.26357		0.140495
PF3D7_0303400	O97224	PF3D7_0303400	70.3247	-1.81361		0.140495
PF07_0021	Q8IC19	PF3D7_0705100	41.0149	-1.7621		0.140495
FEN1	Q7K734	PF3D7_0408500	211.879	-1.58669		0.14079
PF3D7_1448400	Q8IKY9	PF3D7_1448400	204.87	-1.33563		0.14079
PF3D7_1321500	PF3D7_1321500	PF3D7_1321500	214.317	-1.75483		0.140798
PF3D7_1419400	Q8ILQ6	PF3D7_1419400	1983.1	1.15204		0.140857
PF3D7_0501800	Q8I482	PF3D7_0501800	628.186	-1.33453		0.140857
PF3D7_0408100	Q9U0K5	PF3D7_0408100	453.731	1.06742		0.140857
PF3D7_0410300	Q9U0I5	PF3D7_0410300	594.44	1.00457		0.140857
PF3D7_1470300	Q8IKD5	PF3D7_1470300	344.893	1.12043		0.140857
PF3D7_1331500	A0A5K1K8J9	PF3D7_1331500	74.3668	-1.41202		0.140857
PF3D7_1455900	C6S3J5	PF3D7_1455900	33.687	-1.77629		0.140857
PFS38	Q8I423	PF3D7_0508000	138.217	-1.79915		0.14089
PF3D7_1333400	C0H5F2	PF3D7_1333400	1059.45	1.10099		0.141287
PF3D7_1117500	Q8IIJ2	PF3D7_1117500	101.674	-1.44752		0.141515
PF3D7_0904400	Q8I3A5	PF3D7_0904400	51.8862	-1.34033		0.141929
PF3D7_0206700	Q7KWJ4	PF3D7_0206700	1579.11	-1.34401		0.142513
PF3D7_0613800	C6KSY0	PF3D7_0613800	1062.65	-1.90021		0.142513
PF3D7_0919400	Q8I2V9	PF3D7_0919400	172.992	-1.57639		0.142513
PF3D7_0603500	C6KSN3	PF3D7_0603500	83.6449	-1.4597		0.142513
PF3D7_0720100	Q8IBQ1	PF3D7_0720100	375.346	1.05391		0.142513
PF3D7_0406800	Q8I1W3	PF3D7_0406800	80.2843	-1.39456		0.142513
PF3D7_1422600	Q8ILM7	PF3D7_1422600	52.4734	-1.62628		0.142513
PF3D7_0832000	A0A143ZWI7	PF3D7_0832000	4.81858	3.88835		0.142857
PF3D7_1234900	Q8I573	PF3D7_1234900	320.438	-1.63833		0.142878
PF3D7_0302000	O97334	PF3D7_0302000	892.351	1.04009		0.142878
PFL2310w	Q8I4V2	PF3D7_1248200	481.444	1.09635		0.142878
PF3D7_0716500	C0H4M9	PF3D7_0716500	111.244	-1.36909		0.142878
PF3D7_0715100	Q8IBU9	PF3D7_0715100	5.80094	-3.93898		0.142878
PF3D7_1202700	Q8I618	PF3D7_1202700	1088.32	1.11319		0.14291
PF3D7_0905200	Q8I397	PF3D7_0905200	890.382	1.13317		0.14291
PF3D7_1227500	Q8I5E3	PF3D7_1227500	773.681	-1.56108		0.142911
PF3D7_1302700	Q8IET8	PF3D7_1302700	3024.56	1.10739		0.143449
PF3D7_0524400	A0A5K1K870	PF3D7_0524400	1990.6	1.0803		0.143449
PF3D7_1125700	Q8IIA7	PF3D7_1125700	305.806	-1.76449		0.143449
PF3D7_0703600	PF3D7_0703600	PF3D7_0703600	221.413	-1.55371		0.143449
PF3D7_1437000	Q8IL96	PF3D7_1437000	1114.65	1.06339		0.143449
PF3D7_1356300	Q8IDD9	PF3D7_1356300	151.573	-1.51496		0.143449
PF3D7_0930800	C0H577	PF3D7_0930800	194.078	-1.24161		0.143449
PF3D7_0503200	Q8I469	PF3D7_0503200	128.382	-1.46869		0.143449
PF3D7_0414600	Q8I1U2	PF3D7_0414600	75.3169	-1.69142		0.143449
PF3D7_0518000	C0H4E6	PF3D7_0518000	384.477	1.09039		0.143449
PF3D7_1421300	Q8ILN7	PF3D7_1421300	58.0304	-1.65024		0.143449
PF3D7_1140900	Q8IHV6	PF3D7_1140900	55.0847	-1.44674		0.143449
PF3D7_0908100	C0H525	PF3D7_0908100	12.0169	-2.31857		0.143449
PF3D7_0916700	Q8I2Y5	PF3D7_0916700	1852.28	1.23512		0.143594
PF3D7_1414400	Q8ILV1	PF3D7_1414400	624.565	-1.21959		0.143594
PF3D7_0409700	Q8I1W0	PF3D7_0409700	62.1814	-1.28524		0.143594
PF3D7_0720700	Q8IBP4	PF3D7_0720700	3451.75	1.10965		0.143721
PF3D7_MIT03700	PF3D7_MIT03700	PF3D7_MIT03700	99.4349	-1.68274		0.143721
PF3D7_1477300	Q8IK62	PF3D7_1477300	62.7216	1.60185		0.143721
PF3D7_1441100	Q8IL59	PF3D7_1441100	10015.3	0.962429		0.143763
PF3D7_0924600	Q8I2R1	PF3D7_0924600	160.829	-1.58223		0.143763
PF3D7_0918800	Q8I2W5	PF3D7_0918800	672.328	1.18141		0.143763
PF3D7_0815900	Q8IAZ6	PF3D7_0815900	41.5498	-1.7767		0.143763
PF3D7_0528300	Q8I3I4	PF3D7_0528300	19.5544	-2.24887		0.143763
PF3D7_0624100	C6KT77	PF3D7_0624100	122.806	-1.41681		0.143801
PF3D7_1358100	A0A5K1K911	PF3D7_1358100	5230.26	1.06624		0.143823
PF3D7_1134300	Q8II21	PF3D7_1134300	385.937	-1.56177		0.143823
PF3D7_1143800	Q8IHS7	PF3D7_1143800	857.371	1.106		0.143823
PF3D7_0914700	Q8I305	PF3D7_0914700	642.939	1.21205		0.143823
PF3D7_1354300	Q8IDF8	PF3D7_1354300	7279.91	1.08365		0.144052
PF3D7_1353200	Q8IDG8	PF3D7_1353200	4391.53	1.21099		0.144052
PF3D7_1320000	A0A5K1K8Q9	PF3D7_1320000	1445.74	1.13948		0.144052
PF3D7_0409600	Q9U0J0	PF3D7_0409600	635.211	-1.13381		0.144052
PF3D7_1307100	Q8IEP4	PF3D7_1307100	704.198	1.06145		0.144052
PF3D7_1213600	Q8I5R9	PF3D7_1213600	110.806	-1.38157		0.144052
PF3D7_1012300	Q8IJS2	PF3D7_1012300	71.1087	-1.48703		0.144052
PF3D7_1313500	Q8IEH8	PF3D7_1313500	28.3314	-2.17959		0.144052
PF3D7_1032100	Q8IJ85	PF3D7_1032100	2442	1.10042		0.14451
PF3D7_1107100	Q8IIT2	PF3D7_1107100	175.499	-1.57718		0.14451
PF3D7_1235800	Q8I565	PF3D7_1235800	46.7578	-1.49412		0.14451
PF3D7_1238800	Q8I535	PF3D7_1238800	3847.95	0.99655		0.144954
PF3D7_1303400	Q8IET1	PF3D7_1303400	3246.45	1.01647		0.144954
PF3D7_1361700	A0A5K1K9B3	PF3D7_1361700	123.851	-1.62616		0.144954
PF3D7_0613600	C6KSX8	PF3D7_0613600	94.5513	-1.56409		0.144954
PF3D7_1019800	Q8IJK4	PF3D7_1019800	158.001	-1.4463		0.144972
PF3D7_1309700	Q8IEL8	PF3D7_1309700	327.186	1.19671		0.145172
PF3D7_0913300	Q8I319	PF3D7_0913300	2252.34	1.13662		0.145523
PF3D7_1450700	Q8IKW9	PF3D7_1450700	4022.25	1.04849		0.145801
PF3D7_1007700	Q8IJW6	PF3D7_1007700	4122.87	-0.977292		0.146329
PF3D7_0628300	PF3D7_0628300	PF3D7_0628300	1302.76	-1.20042		0.146329
PF3D7_0402200	PF3D7_0402200	PF3D7_0402200	814.072	-1.81341		0.146329
PF3D7_0925200	Q8I2Q6	PF3D7_0925200	1777.87	0.996142		0.146329
PF3D7_1464900	Q8IKI9	PF3D7_1464900	1891.52	1.08051		0.146329
PF3D7_1213900	A0A144A0U7	PF3D7_1213900	1192.55	1.22759		0.146329
PF3D7_1106300	A0A143ZZN7	PF3D7_1106300	513.613	-1.22166		0.146329
PF3D7_1301800	PF3D7_1301800	PF3D7_1301800	412.529	5.44986		0.146329
PF3D7_1402200	Q8IM67	PF3D7_1402200	235.47	-1.21922		0.146329
PF3D7_1123500	Q8IIC8	PF3D7_1123500	806.841	1.12097		0.146329
PF3D7_1231000	A0A144A0B4	PF3D7_1231000	191.548	-1.32453		0.146329
PF3D7_1211200	Q8I5T8	PF3D7_1211200	784.013	1.0206		0.146329
PF3D7_0516000	Q8I3U8	PF3D7_0516000	248.484	-1.10041		0.146329
PF3D7_1408500	Q8IM11	PF3D7_1408500	596.371	1.04316		0.146329
PF3D7_0924300	C0H556	PF3D7_0924300	82.6566	-1.43692		0.146329
PF3D7_1343100	Q8IDQ8	PF3D7_1343100	70.0684	-1.62715		0.146329
PF3D7_0202800	C6S3A7	PF3D7_0202800	52.2454	-1.93251		0.146329
PF3D7_0305800	O97242	PF3D7_0305800	73.5987	-1.26009		0.146329
PF3D7_0728200	Q8IBH5	PF3D7_0728200	39.884	-1.90198		0.146329
PF3D7_MIT01100	PF3D7_MIT01100	PF3D7_MIT01100	57.753	-1.94404		0.146329
PF3D7_1335100	Q8IDX8	PF3D7_1335100	456.01	-1.65314		0.146425
PF3D7_0203900	O96139	PF3D7_0203900	101.745	-1.38984		0.146425
PF3D7_1439400	Q8IL75	PF3D7_1439400	206.481	-1.5135		0.14647
PF3D7_1475300	Q8IK85	PF3D7_1475300	93.9645	-1.3346		0.14652
PF3D7_1435900	Q8ILA5	PF3D7_1435900	37.8574	-1.57897		0.14652
PF3D7_0917800	Q8I2X5	PF3D7_0917800	36.7114	1.5166		0.14652
PF3D7_0904700	Q8I3A2	PF3D7_0904700	32.4862	-1.79675		0.14701
PF3D7_0624200	C6KT78	PF3D7_0624200	211.215	-1.40697		0.147866
PF3D7_0821600	Q8IB50	PF3D7_0821600	676.882	1.15554		0.148247
PF3D7_1224900	Q8I5G8	PF3D7_1224900	238.516	1.09418		0.148247
PF3D7_0718400	Q8IBR7	PF3D7_0718400	285.757	-1.20912		0.148281
PF3D7_1336700	Q8IDW5	PF3D7_1336700	927.654	1.04135		0.148281
PF3D7_0623800	C6KT74	PF3D7_0623800	9136.34	1.16401		0.148376
PFF0380w	C6KSS5	PF3D7_0607700	190.521	-1.85085		0.148376
PF3D7_0424300	PF3D7_0424300	PF3D7_0424300	255.049	-1.37574		0.148376
PF3D7_1028800	Q8IJB6	PF3D7_1028800	55.1141	-1.92045		0.148971
PF3D7_0909700	Q8I355	PF3D7_0909700	902.471	1.08597		0.149028
PF3D7_0934800	Q7K6A0	PF3D7_0934800	185.74	-1.45213		0.149028
PF3D7_1224700	Q8I5H0	PF3D7_1224700	387.465	1.04478		0.149028
PF3D7_0304100	O97229	PF3D7_0304100	36.6651	-2.06554		0.149028
PF3D7_0620400	C6KT44	PF3D7_0620400	20.0643	-2.3341		0.149028
PF3D7_1134700	Q8II17	PF3D7_1134700	2639.97	1.09111		0.149247
PF3D7_0412000	Q9U0H0	PF3D7_0412000	256.261	-1.29974		0.149247
PF3D7_0527900	A0A5K1K8X8	PF3D7_0527900	957.512	1.03037		0.149247
PF3D7_1138000	Q8IHY4	PF3D7_1138000	99.3542	-1.85783		0.149247
PF3D7_1204400	Q8I601	PF3D7_1204400	85.2704	-1.30822		0.149247
PF3D7_1225000	Q8I5G7	PF3D7_1225000	43.4841	-1.3987		0.149247
PF3D7_0529300	Q8I3H4	PF3D7_0529300	34.3182	-1.4885		0.149247
PF3D7_1404800	A0A144A3F9	PF3D7_1404800	5097.65	1.20178		0.14948
PF3D7_0207500	Q9TY96	PF3D7_0207500	752.901	-1.7004		0.14948
PF3D7_0903300	C0H517	PF3D7_0903300	600.005	-1.65017		0.14948
PF3D7_0526200	PF3D7_0526200	PF3D7_0526200	215.807	-1.16134		0.14948
PF3D7_1238600	Q8I537	PF3D7_1238600	89.8969	-1.69255		0.14948
PF3D7_1410700	Q8ILY8	PF3D7_1410700	100.825	-1.54834		0.14948
PF3D7_1339400	A0A5K1K8V5	PF3D7_1339400	62.647	-1.379		0.14948
PF3D7_0626500	C6KTA1	PF3D7_0626500	16.2147	-2.1823		0.14948
PF3D7_1116800	Q8IIJ8	PF3D7_1116800	4096.88	1.15385		0.149503
PF3D7_1332200	A0A5K1K8U2	PF3D7_1332200	50.0987	-1.94503		0.149503
PF3D7_1112500	Q8IIN8	PF3D7_1112500	183.18	1.25793		0.149503
PF3D7_0823200	Q8IB66	PF3D7_0823200	2875.41	0.984826		0.14959
PF3D7_1014700	Q8IJP8	PF3D7_1014700	355.367	-1.21677		0.14959
PF3D7_0503600	Q8I465	PF3D7_0503600	196.581	-1.50609		0.14959
PF3D7_0505400	Q8I448	PF3D7_0505400	156.166	-1.57814		0.14959
PF3D7_0508600	A0A5K1K8H8	PF3D7_0508600	357.937	1.06815		0.14959
PF3D7_0607900	C6KSS7	PF3D7_0607900	171.693	-1.16935		0.150077
PF3D7_0523600	A0A5K1K8Q3	PF3D7_0523600	80.3248	-1.44052		0.150093
PF3D7_1406200	Q8IM32	PF3D7_1406200	13266.1	1.02435		0.150233
PF3D7_MIT01700	PF3D7_MIT01700	PF3D7_MIT01700	49.7725	-1.74263		0.150528
PF3D7_0905900	Q8I390	PF3D7_0905900	537.266	1.1608		0.150845
PF3D7_0205700	PF3D7_0205700	PF3D7_0205700	615.138	1.01963		0.15116
PF3D7_MIT03900	PF3D7_MIT03900	PF3D7_MIT03900	40.229	-1.73489		0.151233
PF3D7_0826000	Q8IB93	PF3D7_0826000	145.842	-1.36627		0.151264
PF3D7_1302000	Q8IEI6	PF3D7_1302000	1909.62	4.95551		0.151415
PF3D7_1457300	Q8IKQ7	PF3D7_1457300	2926.6	1.04913		0.151415
PF3D7_1252400	PF3D7_1252400	PF3D7_1252400	389.373	-1.54869		0.151415
PF3D7_1212500	Q8I5S7	PF3D7_1212500	1224.85	1.02352		0.151415
PF3D7_1028400	Q8IJC0	PF3D7_1028400	1171.96	1.07631		0.151415
PF3D7_1142400	Q8IHU1	PF3D7_1142400	916.639	1.0088		0.151415
PF3D7_0603000	C6KSN0	PF3D7_0603000	618.664	1.02052		0.151415
PF3D7_0909900	Q8I353	PF3D7_0909900	783.177	0.952877		0.151415
PF3D7_0423500	Q8IFN1	PF3D7_0423500	88.2607	-1.85284		0.151415
PF3D7_1347600	C0H5H7	PF3D7_1347600	29.6124	-1.81967		0.151415
PF3D7_0922900	Q8I2S7	PF3D7_0922900	25.2132	-1.76795		0.151415
PF3D7_0706500	C0H4L6	PF3D7_0706500	9298.92	1.03562		0.151522
PF3D7_0722600	Q8IBM7	PF3D7_0722600	2200.85	1.00495		0.151522
PF3D7_1323900	A0A5K1K8R6	PF3D7_1323900	1506.86	1.03693		0.151522
PF3D7_0827600	Q8IBA8	PF3D7_0827600	386.437	-1.23712		0.151522
PF3D7_1364800	Q8ID59	PF3D7_1364800	1292.23	1.0029		0.151522
PF3D7_1470800	Q8IKD0	PF3D7_1470800	144.938	-1.28654		0.151522
PF3D7_0210300	O96186	PF3D7_0210300	135.857	-1.27056		0.151522
PF3D7_1324600	Q8IE71	PF3D7_1324600	76.7953	-1.5491		0.151522
PF3D7_MIT01000	PF3D7_MIT01000	PF3D7_MIT01000	76.739	-1.77279		0.151522
PF3D7_1228100	Q8I5D7	PF3D7_1228100	62.6078	-1.54298		0.151522
PF3D7_0624900	C6KT85	PF3D7_0624900	39.792	-1.8622		0.151522
PF3D7_0112800	Q9U0N3	PF3D7_0112800	74.5479	1.47189		0.151522
PF3D7_0830200	PF3D7_0830200	PF3D7_0830200	17.3776	-2.0501		0.151522
PF3D7_1346300	Q8IDN4	PF3D7_1346300	6654.21	0.989365		0.151663
PF3D7_0508900	Q8I414	PF3D7_0508900	872.999	-1.6236		0.151663
PF3D7_1423000	Q8ILM2	PF3D7_1423000	1842.94	1.01177		0.151663
PF3D7_1367400	Q8ID34	PF3D7_1367400	923.25	1.08517		0.151663
PF3D7_1334300	Q8IDY5	PF3D7_1334300	370.254	-1.13896		0.151663
PF3D7_0214700	O96227	PF3D7_0214700	76.0475	-1.6339		0.151663
PF3D7_1129300	Q8II70	PF3D7_1129300	53.0178	-1.64797		0.151663
PF3D7_1242400	Q8I505	PF3D7_1242400	15.7935	-2.18803		0.151663
PF3D7_1142300	Q8IHU2	PF3D7_1142300	330.934	-1.18935		0.151668
PF3D7_0321800	O97292	PF3D7_0321800	2008.17	0.955531		0.151996
PF3D7_0832700	PF3D7_0832700	PF3D7_0832700	5.59895	3.45936		0.151996
PF3D7_1457700	Q8IKQ3	PF3D7_1457700	2513.67	1.08995		0.152077
PF3D7_1443500	Q8IL36	PF3D7_1443500	203.236	-1.29772		0.15209
PF3D7_0321700	O97291	PF3D7_0321700	413.407	-1.19		0.152121
PF3D7_0110600	Q8I239	PF3D7_0110600	2361.44	1.07332		0.152185
PF3D7_1437200	Q8IL94	PF3D7_1437200	731.257	-1.19534		0.152185
PF3D7_0903200	C0H516	PF3D7_0903200	1030.86	-0.999873		0.152185
PFC0810c	O77374	PF3D7_0318300	423.291	1.04023		0.152185
PF3D7_0209500	O96179	PF3D7_0209500	25.609	-2.38008		0.152185
PF3D7_1433700	Q8ILC6	PF3D7_1433700	188.094	-1.24243		0.152287
PF3D7_0924700	Q8I2R0	PF3D7_0924700	794.26	1.03101		0.15281
PF3D7_0713400	Q8IBW3	PF3D7_0713400	609.263	1.04259		0.153347
PF3D7_1232600	Q8I596	PF3D7_1232600	41.2324	-1.44561		0.153637
PF3D7_1447100	Q8IL01	PF3D7_1447100	795.109	0.978203		0.153807
PF3D7_0729600	PF3D7_0729600	PF3D7_0729600	105.108	-1.38153		0.153807
PF3D7_0403200	Q8I1Z8	PF3D7_0403200	5996.45	0.932065		0.154118
PF3D7_0612900	C6KSX2	PF3D7_0612900	4321.47	0.995141		0.154118
PF3D7_1217200	A0A144A1F1	PF3D7_1217200	3144.09	1.05937		0.154118
PF3D7_1408200	Q8IM14	PF3D7_1408200	1913.83	1.11891		0.154118
PF3D7_0312400	O77344	PF3D7_0312400	680.717	-1.33476		0.154118
PF3D7_1464000	Q8IKJ7	PF3D7_1464000	2065.43	0.942409		0.154118
PF3D7_0107800	A0A143ZUM0	PF3D7_0107800	379.106	-1.07814		0.154118
PF3D7_0313800	C0H472	PF3D7_0313800	218.18	-1.38859		0.154118
PF3D7_1325800	A0A5K1K8C9	PF3D7_1325800	195.698	-1.25581		0.154118
PF3D7_0508800	Q8I415	PF3D7_0508800	185.702	-1.12271		0.154118
PF3D7_0623000	C6KT66	PF3D7_0623000	211.394	-1.09617		0.154118
PF3D7_1231400	Q8I5A6	PF3D7_1231400	127.267	-1.28139		0.154118
PF3D7_1337100	Q8IDW1	PF3D7_1337100	167.122	-1.18264		0.154118
PF3D7_1202400	Q8I621	PF3D7_1202400	111.924	-1.36074		0.154118
PF3D7_0928600	Q8I2M3	PF3D7_0928600	83.2609	-1.57932		0.154118
PF3D7_1358600	A0A5K1K8I4	PF3D7_1358600	49.3607	-1.64644		0.154118
PF3D7_1363800	A0A5K1K926	PF3D7_1363800	24.5402	-1.69696		0.154118
PF3D7_0105900	Q8I282	PF3D7_0105900	26.8516	-1.71302		0.154118
PF3D7_1037200	A0A144A1X7	PF3D7_1037200	13.6693	-2.22338		0.154118
PF3D7_1411500	Q8ILY0	PF3D7_1411500	916.789	1.05422		0.154254
PF3D7_0629900	C6KTD4	PF3D7_0629900	775.183	1.0599		0.155358
PF3D7_0532900	Q8I3E7	PF3D7_0532900	5.72668	3.14754		0.155358
PF3D7_0520600	C0H4F3	PF3D7_0520600	1521.67	1.06955		0.156084
PF3D7_0106700	Q8I275	PF3D7_0106700	3384.62	0.991249		0.15633
PF3D7_0716100	Q8IBT9	PF3D7_0716100	2555.54	1.0235		0.15633
PF3D7_1244200	Q8I4Y8	PF3D7_1244200	702.802	1.01662		0.15633
PF3D7_1441300	Q8IL57	PF3D7_1441300	94.6065	-1.6018		0.15633
PF3D7_1239100	Q8I532	PF3D7_1239100	82.1648	-1.48818		0.15633
PF3D7_0717000	A0A143ZVX7	PF3D7_0717000	60.1233	-1.5088		0.15633
PF3D7_0629300	C6KTC8	PF3D7_0629300	46.2666	-1.71583		0.15633
PF3D7_1341500	A0A5K1K8W3	PF3D7_1341500	21.3136	-2.11499		0.15633
PF3D7_1409600	Q8ILZ9	PF3D7_1409600	99.1421	1.21369		0.15633
PF3D7_0811300	C0H4T9	PF3D7_0811300	18430.9	1.02053		0.156507
PF3D7_0723400	Q8IBL9	PF3D7_0723400	7380.33	1.00851		0.156507
PF3D7_0214400	O96224	PF3D7_0214400	2695.08	1.03035		0.156507
PF3D7_1239700	Q8I526	PF3D7_1239700	797.488	-1.1083		0.156507
PF3D7_1345400	A0A5K1K9F6	PF3D7_1345400	626.225	-1.27291		0.156507
PF3D7_1322200	A0A5K1K9E8	PF3D7_1322200	525.087	-1.29585		0.156507
PF3D7_1456000	Q8IKR9	PF3D7_1456000	275.628	-1.57961		0.156507
PF3D7_0319000	O77368	PF3D7_0319000	266.37	-1.53472		0.156507
PF3D7_1459600	Q8IKN5	PF3D7_1459600	1124.46	0.942328		0.156507
PF3D7_0724800	Q8IBK3	PF3D7_0724800	182.985	-1.44781		0.156507
PF3D7_1471400	Q8IKC5	PF3D7_1471400	197.721	-1.39576		0.156507
PF3D7_0503000	C0H4C3	PF3D7_0503000	206.959	-1.21172		0.156507
PF3D7_1358200	C0H5I8	PF3D7_1358200	691.429	0.943914		0.156507
PF3D7_0811000	Q8IAU5	PF3D7_0811000	128.15	-1.52865		0.156507
PF3D7_1250400	Q8I4T0	PF3D7_1250400	69.7112	-1.76222		0.156507
PF3D7_1326000	A0A5K1K9E9	PF3D7_1326000	111.548	-1.29262		0.156507
PF3D7_1117400	Q8IIJ3	PF3D7_1117400	149.626	-1.03229		0.156507
PF3D7_1126900	Q8II94	PF3D7_1126900	448.314	1.0054		0.156507
PF3D7_1347300	A0A5K1K8X9	PF3D7_1347300	107.541	-1.14495		0.156507
PF3D7_0715300	A0A143ZZT8	PF3D7_0715300	50.0868	-1.85701		0.156507
PF3D7_0605600	C6KSQ4	PF3D7_0605600	37.4991	-1.67156		0.156507
PF3D7_1209500	PF3D7_1209500	PF3D7_1209500	32.3002	-1.70328		0.156507
PF3D7_0625600	C6KT92	PF3D7_0625600	71.5085	1.42554		0.156507
PF3D7_0504100	Q8I460	PF3D7_0504100	34.0472	-1.48752		0.156507
PF3D7_1226900	Q8I5E9	PF3D7_1226900	26.8803	-1.51856		0.156507
PF3D7_1244300	PF3D7_1244300	PF3D7_1244300	41.3983	1.46381		0.156507
PF3D7_1348000	A0A5K1K8E9	PF3D7_1348000	19.3814	-2.20179		0.157109
PF3D7_0604700	C6KSP5	PF3D7_0604700	170.774	-1.41316		0.157116
PF3D7_1145600	A0A143ZYV4	PF3D7_1145600	47.0904	-1.6681		0.157121
PF3D7_1345200	A0A5K1K8X1	PF3D7_1345200	146.478	-1.07746		0.157263
PF3D7_1427000	Q8ILJ4	PF3D7_1427000	185.564	-1.30813		0.157575
PF3D7_1343900	C0H5G7	PF3D7_1343900	350.394	1.0103		0.157575
PF3D7_1332700	Q8IE01	PF3D7_1332700	1160.59	0.997065		0.157716
PF3D7_1405800	Q8IM36	PF3D7_1405800	4836.69	0.996561		0.157911
PF3D7_1110700	A0A143ZXR3	PF3D7_1110700	67.1105	-1.56166		0.159207
PF3D7_1423600	Q8ILL6	PF3D7_1423600	300.702	-1.18425		0.159222
PF3D7_1449700	Q8IKX8	PF3D7_1449700	406.375	1.11505		0.159222
PF3D7_1132300	Q8II42	PF3D7_1132300	180.228	-1.07007		0.159222
PF3D7_0205400	O96149	PF3D7_0205400	357.947	1.04678		0.159222
PF3D7_1420200	Q8ILP8	PF3D7_1420200	69.5791	-1.27548		0.159222
PF3D7_1437300	Q8IL93	PF3D7_1437300	43.6668	-1.7161		0.159222
PF3D7_0531200	Q8I3F6	PF3D7_0531200	14.8932	-2.19797		0.159222
PF3D7_0415400	Q8I1T3	PF3D7_0415400	689.38	0.931928		0.159251
PF3D7_1214400	Q8I5R2	PF3D7_1214400	168.621	1.09101		0.159251
PF3D7_0632800	C6KTF9	PF3D7_0632800	881.706	5.65545		0.159475
PF3D7_1226700	Q8I5F1	PF3D7_1226700	1109.47	1.04065		0.159475
PF3D7_0623700	C6KT73	PF3D7_0623700	128.468	-1.06618		0.159475
PF3D7_0500900	Q8I491	PF3D7_0500900	34.0681	-1.45743		0.159475
PF3D7_1321800	Q8IE98	PF3D7_1321800	969.004	1.00515		0.159568
PF3D7_1348500	Q8IDL4	PF3D7_1348500	124.592	-1.57176		0.159568
PF3D7_0528700	Q8I3I0	PF3D7_0528700	450.992	0.977635		0.159735
PF3D7_0911600	C0H534	PF3D7_0911600	64.9153	-1.59676		0.159735
PF3D7_MIT00900	PF3D7_MIT00900	PF3D7_MIT00900	72.8478	-1.43301		0.159895
PF3D7_0932400	Q8I2J2	PF3D7_0932400	108.144	-1.57048		0.160338
PF3D7_1440400	Q8IL66	PF3D7_1440400	62.9073	-1.84376		0.160338
PF3D7_1006600	Q8IJX5	PF3D7_1006600	260.594	-1.03259		0.160348
PF3D7_1333600	Q8IDZ2	PF3D7_1333600	2053.59	1.015		0.160518
PF3D7_0109950	A0A143ZXB9	PF3D7_0109950	73.1085	-1.37641		0.160518
PF3D7_1448900	C6S3J0	PF3D7_1448900	21.7446	-1.74799		0.160518
PF3D7_1144600	Q8IHS1	PF3D7_1144600	573.06	1.0044		0.16057
PF3D7_1348200	Q8IDL7	PF3D7_1348200	228.168	1.01092		0.16057
PF3D7_0902800	Q8I3C0	PF3D7_0902800	455.551	-1.31928		0.160775
PF3D7_0824900	Q8IB83	PF3D7_0824900	1008.52	0.996714		0.160775
PF3D7_0418600	Q8I1Q1	PF3D7_0418600	96.1021	-1.68354		0.160775
PF3D7_1433600	Q8ILC7	PF3D7_1433600	76.2996	-1.39964		0.160853
PF3D7_1417200	Q8ILS4	PF3D7_1417200	5972.92	1.01733		0.160945
PF3D7_1230800	Q8I5B2	PF3D7_1230800	3334.33	0.999134		0.160945
PF3D7_0833500	A0A143ZZY8	PF3D7_0833500	440.153	5.30232		0.160945
PF3D7_0524900	Q8I3L6	PF3D7_0524900	1116.35	1.02065		0.160945
PF3D7_0926500	Q8I2P4	PF3D7_0926500	218.739	-1.40147		0.160945
PFB0145c	O96133	PF3D7_0203000	250.968	-1.3581		0.160945
PF3D7_1239800	Q8I525	PF3D7_1239800	199.19	-1.11441		0.160945
PF3D7_1245300	Q8I4X8	PF3D7_1245300	54.8455	-1.37335		0.160945
PF3D7_0704300	A0A143ZVW7	PF3D7_0704300	739.432	-1.39841		0.161008
PF3D7_0111500	Q8I231	PF3D7_0111500	306.326	-1.33591		0.161008
PF3D7_1216400	Q8I5P3	PF3D7_1216400	787.072	1.04753		0.161008
PF3D7_1116600	Q8IIK0	PF3D7_1116600	289.299	-1.12906		0.161008
PF3D7_0303300	O77315	PF3D7_0303300	686.557	0.999811		0.161008
PF3D7_1466800	Q8IKG9	PF3D7_1466800	557.521	1.01308		0.161008
PF3D7_0614100	C0H4H5	PF3D7_0614100	68.9181	-1.61127		0.161008
PF3D7_0618500	C6KT25	PF3D7_0618500	52.7512	-1.43332		0.161008
PF3D7_1340300	Q8IDT3	PF3D7_1340300	5653.05	0.98857		0.161019
PF3D7_0606600	C6KSR4	PF3D7_0606600	3499.29	1.00458		0.161322
PF3D7_1349200	Q8IDK7	PF3D7_1349200	3000.44	0.964092		0.161559
PF3D7_1212900	Q8I5S4	PF3D7_1212900	1607.21	0.972035		0.161726
PF3D7_1217700	Q8I5N1	PF3D7_1217700	704.971	0.949916		0.161726
PF3D7_1307500	Q8IEP0	PF3D7_1307500	40.9628	-1.75769		0.161726
PF3D7_0507900	C0H4D1	PF3D7_0507900	149.973	1.08795		0.161726
PF3D7_0917600	Q8I2X7	PF3D7_0917600	1399.41	1.00865		0.162213
PF3D7_1007100	C6S3C4	PF3D7_1007100	7.88576	-3.06493		0.162213
PF3D7_0831300	C0H4Z6	PF3D7_0831300	327.551	-1.19492		0.162392
PF3D7_1230500	Q8I5B5	PF3D7_1230500	243.972	1.20152		0.162712
PF3D7_1328300	Q8IE43	PF3D7_1328300	581.143	-1.04784		0.162807
PF3D7_0615900	A0A5K1K895	PF3D7_0615900	699.932	-1.1004		0.162807
PF3D7_0603800	C6KSN6	PF3D7_0603800	214.046	-1.42305		0.162807
PF3D7_1314700	Q8IEG8	PF3D7_1314700	289.268	-1.18421		0.162807
PF3D7_1415300	Q8ILU3	PF3D7_1415300	165.487	-1.2241		0.162807
PF3D7_1120700	Q8IIG0	PF3D7_1120700	70.5899	-1.24116		0.162807
PF3D7_1419700	Q8ILQ3	PF3D7_1419700	6506.97	1.00535		0.163228
PF3D7_0831500	A0A143ZW02	PF3D7_0831500	3258.5	1.02546		0.163228
PF3D7_0622200	C6KT59	PF3D7_0622200	1750.33	1.0882		0.163228
PF3D7_1317200	Q8IEE4	PF3D7_1317200	597.061	-1.13086		0.163228
PF3D7_0824800	Q8IB82	PF3D7_0824800	1557.78	0.965049		0.163228
PF3D7_0925800	Q8I2Q1	PF3D7_0925800	479.169	-0.932521		0.163228
PF3D7_1146600	Q8IHQ2	PF3D7_1146600	238.835	-1.16468		0.163228
PF3D7_0214800	O96228	PF3D7_0214800	761.772	1.103		0.163228
PF3D7_0303700	O97227	PF3D7_0303700	260.716	-1.32045		0.163228
PF3D7_0320700	Q9NFA0	PF3D7_0320700	243.684	-1.35702		0.163228
PF3D7_0714300	Q8IBV4	PF3D7_0714300	795.297	0.938648		0.163228
PF3D7_0822800	C0H4X1	PF3D7_0822800	296.041	1.14652		0.163228
PF3D7_1225400	Q8I5G3	PF3D7_1225400	351.742	1.03734		0.163228
CPK2	Q8ICR0	PF3D7_0610600	130.433	-1.04167		0.163228
PF3D7_0602900	C6KSM9	PF3D7_0602900	225.258	1.04691		0.163228
PF3D7_1342200	A0A5K1K8X3	PF3D7_1342200	46.4503	-1.63632		0.163228
PF3D7_1033500	Q8IJ73	PF3D7_1033500	445.841	0.994626		0.163285
PF3D7_1124800	Q8IIB5	PF3D7_1124800	2417.86	1.01001		0.16379
PF3D7_0306400	O97245	PF3D7_0306400	219.003	-1.38483		0.16379
PF3D7_0101300	B9ZSH7	PF3D7_0101300	5.36933	3.38544		0.16379
PF3D7_1205600	Q8I5Y9	PF3D7_1205600	1370.33	-1.25383		0.163877
PF3D7_1028300	Q8IJC1	PF3D7_1028300	848.072	1.10434		0.163979
PF3D7_0210400	C6S3B5	PF3D7_0210400	81.9714	-1.38017		0.16409
PF3D7_0419400	Q8I1P3	PF3D7_0419400	90.3357	-1.68731		0.164282
PF3D7_1438000	Q8IL87	PF3D7_1438000	4534.42	0.988367		0.164403
PF3D7_1137300	Q8IHZ2	PF3D7_1137300	1442.96	0.981312		0.164403
PF3D7_1326500	A0A5K1K847	PF3D7_1326500	105.336	-1.2887		0.164403
PF3D7_1476400	PF3D7_1476400	PF3D7_1476400	224.372	1.04144		0.164403
PF3D7_1017600	Q8IJM3	PF3D7_1017600	8787.62	0.892417		0.164658
PF3D7_1330200	A0A5K1K8U3	PF3D7_1330200	145.029	-1.11383		0.164688
PF3D7_0417500	PF3D7_0417500	PF3D7_0417500	256.837	-1.41079		0.164711
PF3D7_1226800	Q8I5F0	PF3D7_1226800	133.655	-1.10417		0.164711
PF3D7_1227700	Q8I5E1	PF3D7_1227700	1172.83	0.892528		0.164859
PF3D7_1348300	Q8IDL6	PF3D7_1348300	491.859	1.10686		0.164859
PF3D7_0526000	Q8I3K5	PF3D7_0526000	58.7946	-1.18714		0.164869
PF3D7_1220100	Q8I5L1	PF3D7_1220100	727.568	0.931133		0.164935
PF3D7_0907000	C0H523	PF3D7_0907000	197.698	1.25767		0.164935
PF3D7_1322000	Q8IE96	PF3D7_1322000	224.352	-1.44636		0.165227
PF3D7_1403600	Q8IM58	PF3D7_1403600	78.0731	-1.69123		0.165227
PF3D7_1338000	C0H5F8	PF3D7_1338000	138.824	-1.02814		0.165227
PF3D7_1110800	C6S3E9	PF3D7_1110800	29.4524	-1.50594		0.165227
PF3D7_1477400	Q8IK61	PF3D7_1477400	29.3346	1.63792		0.165227
PF3D7_MIT02100	PF3D7_MIT02100	PF3D7_MIT02100	600.526	-1.04128		0.16526
PF3D7_1324200	Q8IE75	PF3D7_1324200	2200.79	0.957324		0.16526
PF3D7_1249400	Q8I4U0	PF3D7_1249400	68.9106	-1.2741		0.16526
PF3D7_0408700	Q9U0J9	PF3D7_0408700	11.6314	-2.39509		0.16526
PF3D7_1360500	Q8IDA0	PF3D7_1360500	156.144	-1.1305		0.165323
PF3D7_0106000	B9ZSI3	PF3D7_0106000	94.8708	-1.39513		0.165323
PF3D7_0607200	C6KSS0	PF3D7_0607200	66.4767	-1.42069		0.165323
PF3D7_1222600	Q8I5I9	PF3D7_1222600	52.6488	1.20044		0.165431
PF3D7_1213400	Q8I5S1	PF3D7_1213400	10.1599	-2.35913		0.165508
PF3D7_1133100	Q8II33	PF3D7_1133100	2267.53	0.943194		0.16598
PF3D7_1225500	Q8I5G2	PF3D7_1225500	721.867	0.985964		0.16598
PF3D7_1310600	Q76NM7	PF3D7_1310600	172.5	-0.995953		0.16612
PF3D7_1415100	Q8ILU5	PF3D7_1415100	26.3861	-1.47942		0.16612
PF3D7_0923900	Q8I2R8	PF3D7_0923900	1985.58	0.960724		0.166672
PF3D7_1110200	Q8IIR0	PF3D7_1110200	3132.17	0.890597		0.166854
PF3D7_1333200	Q8IDZ6	PF3D7_1333200	394.499	-1.03424		0.167317
PF3D7_1321700	Q8IE99	PF3D7_1321700	6133.87	0.907796		0.167338
PF3D7_0525600	A0A5K1K9E4	PF3D7_0525600	158.382	-1.25192		0.167578
PF3D7_0206900	PF3D7_0206900	PF3D7_0206900	94.6796	-1.29195		0.168178
PF3D7_1128700	Q8II76	PF3D7_1128700	33.4901	-1.70717		0.168178
PF3D7_1039600	PF3D7_1039600	PF3D7_1039600	102.186	4.57785		0.168481
PF3D7_1451900	Q8IKV7	PF3D7_1451900	1733.1	1.01271		0.169002
PF3D7_1206600	Q8I5X9	PF3D7_1206600	3366.38	0.991677		0.169686
PF3D7_1434800	Q8ILB6	PF3D7_1434800	743.862	-1.09442		0.169686
PF3D7_1219700	Q7KQK1	PF3D7_1219700	28.519	-1.62983		0.169686
PF3D7_1234700	Q8I575	PF3D7_1234700	49.0086	-1.36514		0.169904
PF3D7_1030700	Q8IJ98	PF3D7_1030700	170.729	1.18648		0.170227
PF3D7_1212700	Q8I5S6	PF3D7_1212700	34601.4	0.921706		0.170242
PF3D7_0308900	O77327	PF3D7_0308900	1267.72	0.935428		0.170242
PF3D7_0624500	C6KT81	PF3D7_0624500	145.688	-1.49696		0.170242
PF3D7_1336200	Q8IDW9	PF3D7_1336200	533.87	-1.24653		0.170398
PF3D7_0420000	Q8I1N9	PF3D7_0420000	7747.69	0.955297		0.170425
PF3D7_0316300	PF3D7_0316300	PF3D7_0316300	602.164	-1.43413		0.170425
PF3D7_0729400	Q8IBG5	PF3D7_0729400	1503.93	1.01937		0.170425
PF3D7_1309500	Q8I700	PF3D7_1309500	637.982	1.05804		0.170425
PF3D7_1415800	Q8ILT8	PF3D7_1415800	653.746	1.01043		0.170425
PF3D7_1238700	A0A144A4I8	PF3D7_1238700	167.327	-1.29381		0.170425
PF3D7_1409800	Q8ILZ7	PF3D7_1409800	164.782	-1.13982		0.170425
PF3D7_1314200	Q8IEH2	PF3D7_1314200	157.948	-1.24751		0.170425
PF3D7_0103000	B9ZSH9	PF3D7_0103000	66.7606	-1.50143		0.170425
PF3D7_0916500	C0H540	PF3D7_0916500	129.102	-1.13311		0.170425
PF3D7_1100500	Q8IIZ1	PF3D7_1100500	16.0353	2.1861		0.170425
PF3D7_1350500	A0A5K1K8S2	PF3D7_1350500	820.096	1.00336		0.170452
PF3D7_0918100	C0H542	PF3D7_0918100	2003	0.937046		0.170453
PF3D7_0921800	C0H549	PF3D7_0921800	677.419	1.10821		0.171075
PF3D7_1241100	Q8I518	PF3D7_1241100	707.406	0.944868		0.171075
PF3D7_0105200	Q8I289	PF3D7_0105200	222.128	-1.06152		0.171075
PF3D7_1306700	Q8IEP8	PF3D7_1306700	59.4778	-1.2832		0.17138
PF3D7_1237900	Q8I544	PF3D7_1237900	2984.39	0.896895		0.17159
PF3D7_1016900	Q8IJM9	PF3D7_1016900	410.533	-1.12818		0.171593
PF3D7_0904800	Q8I3A1	PF3D7_0904800	409.56	-1.13026		0.171593
PF3D7_1435300	Q8ILB1	PF3D7_1435300	201.403	-1.51134		0.171593
PF3D7_1215000	Q8I5Q6	PF3D7_1215000	41.748	-1.54621		0.171788
PF3D7_0815800	Q8IAZ5	PF3D7_0815800	1194.17	-0.903856		0.171804
PF3D7_0617100	C6KT12	PF3D7_0617100	833.793	1.01107		0.17208
PF3D7_0709600	C0H4M3	PF3D7_0709600	669.624	0.942549		0.17208
PF3D7_0504200	Q8I459	PF3D7_0504200	67.6579	-1.54294		0.17255
PF3D7_1225200	Q8I5G5	PF3D7_1225200	1069.28	0.95552		0.172611
PF3D7_0521400	Q8I3P8	PF3D7_0521400	135.96	-1.14955		0.172611
PF3D7_0518200	C0H4E7	PF3D7_0518200	88.548	-1.29211		0.172727
PF3D7_1363000	A0A5K1K998	PF3D7_1363000	269.817	1.01039		0.172764
PF3D7_1313000	Q8IEI4	PF3D7_1313000	101.592	-1.12101		0.172764
PF3D7_0315800	O97273	PF3D7_0315800	615.803	0.96231		0.172899
PFD0725c	Q8I1T8	PF3D7_0415000	280.755	1.19079		0.173112
OAT	Q6LFH8	PF3D7_0608800	1620.55	-0.94102		0.173129
PF3D7_1110500	Q8IIQ6	PF3D7_1110500	386.391	-1.02968		0.173129
PF3D7_0811900	C0H4U1	PF3D7_0811900	239.168	-1.26131		0.173129
PF3D7_0828900	Q8IBC0	PF3D7_0828900	101.765	-1.405		0.173129
PF3D7_1015800	Q8IJN8	PF3D7_1015800	287.53	-1.36067		0.173239
PF3D7_0826400	Q8IB97	PF3D7_0826400	40.7758	-1.52808		0.173239
PF3D7_0320000	C0H480	PF3D7_0320000	212.227	-1.23836		0.173654
PF3D7_1002900	Q8IK07	PF3D7_1002900	325.848	0.926164		0.17378
PF3D7_0216200	O96240	PF3D7_0216200	388.489	1.07682		0.173939
PF3D7_1138400	Q8IHY1	PF3D7_1138400	159.04	-1.61395		0.173976
PF3D7_0903700	Q6ZLZ9	PF3D7_0903700	255.55	-1.39693		0.174429
PF3D7_1452400	Q8IKV2	PF3D7_1452400	1533.09	0.932503		0.17459
PF3D7_1028500	Q8IJB9	PF3D7_1028500	988.387	0.926158		0.17459
PF3D7_0909600	Q8I356	PF3D7_0909600	141.913	-1.40205		0.17459
PF3D7_1127500	Q8II88	PF3D7_1127500	103.336	-1.27339		0.17459
PF3D7_1024100	Q8IJG4	PF3D7_1024100	80.7151	-1.39981		0.17459
PF3D7_1475200	Q8IK86	PF3D7_1475200	48.8524	-1.51648		0.17459
PF3D7_0820800	Q8IB42	PF3D7_0820800	60.1081	-1.18073		0.17459
PF3D7_MIT03500	PF3D7_MIT03500	PF3D7_MIT03500	32.6961	-1.87966		0.17459
PF3D7_1116100	C6S3F2	PF3D7_1116100	519.229	-1.34952		0.174627
PF3D7_0714600	Q8IBV1	PF3D7_0714600	1231.54	0.906558		0.174669
PF3D7_0310400	O77361	PF3D7_0310400	566.252	-1.42468		0.174888
PF3D7_0907600	Q8I375	PF3D7_0907600	462.04	0.949926		0.174888
PF3D7_0931100	Q8I2K4	PF3D7_0931100	6536.24	0.962544		0.174943
PF3D7_1108500	Q8IIR8	PF3D7_1108500	305.047	-1.24915		0.174943
PF3D7_0602600	C6KSM6	PF3D7_0602600	1179.86	0.980031		0.174943
PF3D7_0621900	C6KT56	PF3D7_0621900	1936.02	0.960808		0.175193
PF3D7_1412900	PF3D7_1412900	PF3D7_1412900	900.451	0.948514		0.175193
PF3D7_0211700	O96197	PF3D7_0211700	277.772	-1.12465		0.175242
PF3D7_0503300	Q8I468	PF3D7_0503300	3086.82	0.868815		0.175326
PF3D7_0310300	C0H469	PF3D7_0310300	2292.67	0.949654		0.175326
PF3D7_1414800	Q8ILU8	PF3D7_1414800	945.345	1.01826		0.175326
PF3D7_0304700	O97233	PF3D7_0304700	15.2217	-2.12677		0.175326
PF13_0326	Q8ID92	PF3D7_1361400	11.1866	-2.35067		0.175326
PF3D7_1407800	Q8IM16	PF3D7_1407800	3371.9	1.01451		0.175572
PF3D7_0808300	Q8IAS1	PF3D7_0808300	916.792	0.934395		0.175572
PF3D7_1015600	Q8IJN9	PF3D7_1015600	1112.79	-1.0701		0.175643
PF3D7_1330400	PF3D7_1330400	PF3D7_1330400	798.504	0.958132		0.175994
PF3D7_1434600	Q8ILB8	PF3D7_1434600	2356.03	0.970776		0.17609
PF3D7_1203500	Q8I610	PF3D7_1203500	1369.57	0.872631		0.17609
PF3D7_0825200	Q8IB86	PF3D7_0825200	32.9974	-1.48353		0.17609
PF3D7_1108000	Q8IIS2	PF3D7_1108000	2519.69	0.923471		0.176223
PF3D7_1307600	Q8IEN9	PF3D7_1307600	277.284	-1.00668		0.176223
PF3D7_1214900	Q8I5Q7	PF3D7_1214900	147.678	-1.15527		0.176237
PF3D7_1228000	Q8I5D8	PF3D7_1228000	71.5247	-1.35801		0.176942
PF3D7_0529400	PF3D7_0529400	PF3D7_0529400	791.65	-1.02568		0.177115
PF3D7_0529800	Q8I3H0	PF3D7_0529800	585.715	-1.21831		0.177115
PF3D7_0927600	Q8I2N3	PF3D7_0927600	278.822	-1.34564		0.177115
PF3D7_0623600	C6KT72	PF3D7_0623600	1241.29	0.874031		0.177115
PF3D7_0105800	Q8I283	PF3D7_0105800	313.914	-1.37148		0.17725
PF3D7_0805700	C0H4R8	PF3D7_0805700	99.0649	-1.5645		0.17725
PF3D7_1423100	Q8ILM1	PF3D7_1423100	37.5112	-1.73047		0.17725
PF3D7_1125600	C6S3G9	PF3D7_1125600	26.9293	-1.61939		0.17725
PF3D7_0932500	Q8I2J1	PF3D7_0932500	40.5449	-1.68933		0.177277
PF3D7_1445000	Q8IL23	PF3D7_1445000	49.2019	-1.32839		0.177277
PF3D7_0930400	PF3D7_0930400	PF3D7_0930400	2449.13	0.905293		0.177582
PF3D7_0409100	C0H4A0	PF3D7_0409100	1934.61	0.935631		0.177582
PF3D7_0507500	Q8I0V0	PF3D7_0507500	165.489	-1.48415		0.177582
PF3D7_1033700	Q8IJ72	PF3D7_1033700	993.041	0.943924		0.177582
PF3D7_0619700	C6KT37	PF3D7_0619700	91.8443	-1.52293		0.177582
PF3D7_1012100	Q8IJS4	PF3D7_1012100	128.108	-1.25681		0.177582
PF3D7_1324700	C0H5D3	PF3D7_1324700	342.549	0.98639		0.177582
PF3D7_1350200	Q8IDJ7	PF3D7_1350200	328.753	1.05611		0.177582
PF3D7_0914200	Q8I310	PF3D7_0914200	366.281	0.970729		0.177582
PF3D7_0933400	C0H588	PF3D7_0933400	22.5938	-1.68768		0.177582
PF3D7_1136300	Q8II01	PF3D7_1136300	6000.07	0.963955		0.177849
PF3D7_0419600	Q76NN6	PF3D7_0419600	6788.86	0.834377		0.177849
PF3D7_0411900	Q9U0H1	PF3D7_0411900	489.734	-1.24563		0.177849
PF3D7_1348400	A0A5K1K8R0	PF3D7_1348400	244.742	-1.21801		0.177849
PF3D7_1406700	Q8IM27	PF3D7_1406700	112.933	-1.3089		0.177849
PF3D7_1308500	Q8IEN0	PF3D7_1308500	51.7445	-1.21948		0.177849
PF3D7_0215800	O96237	PF3D7_0215800	86.1701	-1.24906		0.177891
PF3D7_1021700	Q8IJI6	PF3D7_1021700	2101.67	-0.959148		0.177942
PF3D7_0703200	Q8IC38	PF3D7_0703200	489.842	-1.08093		0.177942
PF3D7_0409200	Q9U0J4	PF3D7_0409200	1154.41	0.932451		0.177942
PF3D7_1324100	Q8IE76	PF3D7_1324100	103.54	-1.2694		0.177942
PF3D7_1209600	Q8I5V3	PF3D7_1209600	8.53431	-2.86908		0.177942
PF3D7_0307300	O97251	PF3D7_0307300	4.64482	-3.59956		0.177942
PF3D7_1409200	PF3D7_1409200	PF3D7_1409200	70.238	-1.70054		0.178165
PF3D7_1218400	Q8I5M4	PF3D7_1218400	1763.05	0.947345		0.17832
PF3D7_1462900	Q8IKK6	PF3D7_1462900	87.9316	1.26131		0.178633
PF3D7_0212000	O96200	PF3D7_0212000	71.0396	-1.52084		0.178648
PF3D7_1004200	Q8IJZ5	PF3D7_1004200	466.523	-1.04674		0.178887
PF3D7_0202400	O96127	PF3D7_0202400	26659	-1.05201		0.178903
PF3D7_1123100	Q8IID2	PF3D7_1123100	5993.69	0.960597		0.178903
PF3D7_1123000	Q8IID3	PF3D7_1123000	4963.38	0.969582		0.178903
PF3D7_0632600	PF3D7_0632600	PF3D7_0632600	907.228	5.35695		0.178903
PF3D7_0921900	Q8I2T4	PF3D7_0921900	3673.58	0.896174		0.178903
PF11_0090	Q8IIS5	PF3D7_1107700	1615.38	0.959367		0.178903
PF3D7_1312600	Q8IEJ6	PF3D7_1312600	144.219	-1.67257		0.178903
EIF6	Q8IE00	PF3D7_1332800	724.242	1.01198		0.178903
PF3D7_1031200	Q8IJ93	PF3D7_1031200	127.673	-1.16762		0.178903
PF3D7_1328000	A0A5K1K950	PF3D7_1328000	134.369	-1.28032		0.178903
PF3D7_0618900	PF3D7_0618900	PF3D7_0618900	77.3754	-1.46058		0.178903
PF3D7_1426600	Q8ILJ8	PF3D7_1426600	68.5337	-1.36113		0.178903
PF3D7_1226100	Q8I5F6	PF3D7_1226100	69.1645	-1.40722		0.178903
PF3D7_1245900	Q8I4X3	PF3D7_1245900	116.483	1.28159		0.178903
PF3D7_0104900	PF3D7_0104900	PF3D7_0104900	70.9473	1.09181		0.178903
PF3D7_1322800	A0A5K1K836	PF3D7_1322800	9.35813	-2.37143		0.178903
PF3D7_1119000	Q8IIH7	PF3D7_1119000	390.715	-0.921053		0.179049
PF3D7_1305100	Q8IER5	PF3D7_1305100	59.5853	-1.45834		0.179306
PF3D7_1344200	C0H5H0	PF3D7_1344200	4999.55	0.893778		0.179465
PF3D7_0936000	Q8I2G0	PF3D7_0936000	15868.9	1.0616		0.179548
PF3D7_0527000	Q8I3J5	PF3D7_0527000	1288.4	-1.31757		0.179865
PF3D7_1118500	Q8III3	PF3D7_1118500	4274.32	0.922156		0.179865
PF3D7_0729300	Q8IBG6	PF3D7_0729300	1361.07	0.99446		0.179865
PF3D7_1466700	Q8IKH0	PF3D7_1466700	349.766	1.00271		0.179865
PF3D7_0902600	PF3D7_0902600	PF3D7_0902600	272.052	1.04283		0.179865
PF3D7_1454500	Q8IKT4	PF3D7_1454500	384.403	1.05138		0.180073
PF3D7_0607000	C6KSR8	PF3D7_0607000	21373.4	0.908492		0.18015
PF3D7_1249600	A0A144A0U1	PF3D7_1249600	54.2271	-1.55145		0.18015
PF3D7_0925500	C0H561	PF3D7_0925500	91.7578	-1.24894		0.18015
PF3D7_1411200	Q8ILY3	PF3D7_1411200	1409.75	0.955427		0.180217
PF3D7_0725000	Q8IBK1	PF3D7_0725000	400.522	-0.875418		0.180217
PF3D7_1458800	Q8IKP3	PF3D7_1458800	229.657	1.00875		0.180362
PF3D7_1315200	C0H5B5	PF3D7_1315200	50.0691	-1.24936		0.180788
PF3D7_1367100	Q8ID37	PF3D7_1367100	828.294	0.933308		0.18097
PF3D7_1236700	Q8I556	PF3D7_1236700	186.314	-1.13938		0.181132
PF3D7_0422900	Q8IFN7	PF3D7_0422900	18.528	-1.63953		0.181132
PF3D7_0929200	C0H570	PF3D7_0929200	2862.38	0.864983		0.181175
PF3D7_0104300	Q8I296	PF3D7_0104300	9824.18	0.955486		0.181557
PF3D7_0926100	Q8I2P8	PF3D7_0926100	7202.06	0.987743		0.181557
PF3D7_1456900	Q8IKR0	PF3D7_1456900	561.325	0.967031		0.181557
PF3D7_0715800	Q8IBU2	PF3D7_0715800	130.453	-1.2218		0.181557
PF3D7_0605000	C6KSP8	PF3D7_0605000	53.3416	-1.17466		0.181557
PF3D7_0607300	C6KSS1	PF3D7_0607300	30.7564	-1.44094		0.181557
PF3D7_1316200	Q8IEF2	PF3D7_1316200	26.6674	-1.4076		0.181557
PF3D7_0705000	Q8IC20	PF3D7_0705000	2688.17	0.894037		0.181731
PF3D7_1126500	Q8II99	PF3D7_1126500	1898.92	0.980491		0.181731
PF3D7_0104400	Q8I295	PF3D7_0104400	248.425	-0.988069		0.181731
PF10_0084	Q7KQL5	PF3D7_1008700	621.716	-1.29513		0.182192
PF3D7_0319900	O97279	PF3D7_0319900	58.9421	1.26165		0.182467
PF3D7_1020700	Q8IJJ5	PF3D7_1020700	1781.38	1.04832		0.18253
PF3D7_0627800	C6KTB4	PF3D7_0627800	888.999	0.950953		0.18253
PF3D7_1218100	A0A144A3X6	PF3D7_1218100	5.21451	-3.78348		0.182547
PF3D7_0728600	Q8IBH2	PF3D7_0728600	586.737	-1.32234		0.182847
PF3D7_0602100	C6KSM1	PF3D7_0602100	2040.25	0.894424		0.182964
PF3D7_1412000	Q8ILX4	PF3D7_1412000	18.839	-1.68826		0.183145
PF3D7_1357700	A0A5K1K903	PF3D7_1357700	1900.6	1.02567		0.184062
PF3D7_1251500	A0A144A382	PF3D7_1251500	2421.84	0.951204		0.184087
PF3D7_1335600	Q8IDX4	PF3D7_1335600	107.664	1.25926		0.184087
PF3D7_1448500	Q8IKY8	PF3D7_1448500	1103.95	-1.17818		0.18424
MED6	Q8IKE0	PF3D7_1469700	128.484	-1.1764		0.184364
PF3D7_0817200	Q8IB08	PF3D7_0817200	163.611	1.03209		0.184364
PF3D7_1344500	A0A5K1K8P1	PF3D7_1344500	30.5767	-1.81788		0.184375
PF3D7_1236800	Q8I555	PF3D7_1236800	32.3106	-1.52169		0.18478
PF3D7_0406700	C0H492	PF3D7_0406700	155.62	-1.38925		0.184982
PF3D7_0513600	Q8I0W8	PF3D7_0513600	1419.14	-1.04682		0.18517
PF3D7_0936200	Q8I2F8	PF3D7_0936200	601.113	-1.14709		0.18517
PF3D7_1318600	C0H5C4	PF3D7_1318600	16.4851	-1.98816		0.18517
PF3D7_1001300	Q8IK23	PF3D7_1001300	13.038	-1.85372		0.18517
PF3D7_0927500	C0H568	PF3D7_0927500	5.22062	-3.40368		0.18517
PF3D7_1024800	Q8IJF6	PF3D7_1024800	7241.49	1.06839		0.185329
PF3D7_0509400	Q8I410	PF3D7_0509400	5392.42	0.939778		0.185329
PF3D7_1002400	PF3D7_1002400	PF3D7_1002400	6651.43	0.841982		0.185329
PF3D7_0911900	Q8I333	PF3D7_0911900	5422.76	0.944772		0.185329
PF3D7_0404300	Q8I1Y6	PF3D7_0404300	3477.17	0.848919		0.185329
PF3D7_0610900	C6KSV4	PF3D7_0610900	3367.04	0.903415		0.185329
PF3D7_0516800	Q8I3U0	PF3D7_0516800	560.584	-1.3459		0.185329
PF3D7_0519800	Q8I3R2	PF3D7_0519800	1540.53	1.0055		0.185329
PF3D7_0817600	Q8IB11	PF3D7_0817600	313.25	-1.29631		0.185329
PF3D7_0804000	Q8IAN8	PF3D7_0804000	1853.78	0.873696		0.185329
PF3D7_1337400	A0A5K1K8V2	PF3D7_1337400	783.781	0.951052		0.185329
PF3D7_0215500	O96234	PF3D7_0215500	950.933	0.862401		0.185329
PF3D7_0616200	C6KT03	PF3D7_0616200	202.6	-1.24872		0.185329
PF3D7_1241900	Q8I510	PF3D7_1241900	1164.02	0.875325		0.185329
PF3D7_0602400	C6KSM4	PF3D7_0602400	320.198	-0.962963		0.185329
PF3D7_0629400	C6KTC9	PF3D7_0629400	313.159	-1.01296		0.185329
PF3D7_1473500	Q8IKA2	PF3D7_1473500	548.286	1.0397		0.185329
PF3D7_1211300	Q8I5T7	PF3D7_1211300	126.133	-1.23946		0.185329
PF3D7_1114900	Q8IIL3	PF3D7_1114900	88.5774	-1.54266		0.185329
PF3D7_1455700	Q8IKS1	PF3D7_1455700	123.578	-1.3907		0.185329
PF3D7_1465000	Q8IKI8	PF3D7_1465000	100.669	-1.38959		0.185329
PF3D7_0925300	Q8I2Q5	PF3D7_0925300	103.743	-1.36366		0.185329
MAL8P1.31	C0H4X5	PF3D7_0824600	449.732	0.947088		0.185329
PF3D7_1347100	Q8IDM7	PF3D7_1347100	104.969	-1.33662		0.185329
PF3D7_1037700	Q8IJ30	PF3D7_1037700	236.9	1.19331		0.185329
PF3D7_0530600	Q8I3G2	PF3D7_0530600	433.052	0.934739		0.185329
PF3D7_0203100	O96134	PF3D7_0203100	86.1638	-1.14586		0.185329
PF3D7_0809250	A0A5K1K8Z8	PF3D7_0809250	74.1391	-1.47286		0.185329
PF3D7_1119800	Q8IIG9	PF3D7_1119800	334.218	0.93969		0.185329
PF3D7_0917400	Q8I2X9	PF3D7_0917400	50.3629	-1.48943		0.185329
PF3D7_1328400	C0H5E6	PF3D7_1328400	97.376	-1.08412		0.185329
PF3D7_0730100	Q8IBF9	PF3D7_0730100	71.6443	-1.24982		0.185329
PF3D7_1124000	Q8IIC3	PF3D7_1124000	272.184	0.913212		0.185329
PF3D7_0104100	Q8I299	PF3D7_0104100	38.3993	-1.63049		0.185329
PF3D7_0502600	C0H4C1	PF3D7_0502600	66.5071	-1.15974		0.185329
PF3D7_0823600	Q8IB70	PF3D7_0823600	90.4087	1.24329		0.185329
PF3D7_0108100	Q8I260	PF3D7_0108100	33.4546	-1.39115		0.185329
PF3D7_1131300	Q8II51	PF3D7_1131300	33.6871	-1.30369		0.185329
PF3D7_0314300	O97275	PF3D7_0314300	6.98886	-2.54611		0.185329
PF3D7_0935000	Q8I2G9	PF3D7_0935000	740.517	0.871444		0.185376
PF3D7_1364000	A0A5K1K9G3	PF3D7_1364000	70.5602	1.20759		0.185469
PF3D7_0817300	Q8IB09	PF3D7_0817300	1232.04	-1.01245		0.185625
PF3D7_1448000	Q8IKZ5	PF3D7_1448000	1912.68	0.997739		0.186223
PF3D7_1413800	Q8ILV7	PF3D7_1413800	344.972	1.05719		0.186223
PF3D7_0915600	Q8I2Z6	PF3D7_0915600	415.173	0.956445		0.186223
PF3D7_MIT01800	PF3D7_MIT01800	PF3D7_MIT01800	36.9916	-1.60565		0.186223
PF3D7_0313700	PF3D7_0313700	PF3D7_0313700	124.548	-1.37345		0.18634
PF3D7_1445900	Q8IL13	PF3D7_1445900	4889.02	0.99011		0.186427
PF11_0213	Q8IIG1	PF3D7_1120600	509.161	-1.23359		0.186427
PF3D7_0417700	C0H4B2	PF3D7_0417700	20.0517	-2.02385		0.186463
PF3D7_1207100	Q8I5X4	PF3D7_1207100	5180.39	0.884906		0.186564
PF3D7_0422500	Q8IFP1	PF3D7_0422500	2408.02	0.866781		0.186564
PF3D7_1435700	PF3D7_1435700	PF3D7_1435700	489.224	-1.21216		0.186564
NTH1	C6KSY9	PF3D7_0614800	374.997	-1.16493		0.186564
PF3D7_1104100	Q8IIW1	PF3D7_1104100	613.28	0.973637		0.186564
PF3D7_0514300	Q8I3W4	PF3D7_0514300	238.236	-0.962017		0.186564
PF3D7_1306900	C0H5A4	PF3D7_1306900	505.663	1.00163		0.186564
PF3D7_1242900	Q8I500	PF3D7_1242900	68.5412	-1.13823		0.186564
PF3D7_1434400	Q8ILC0	PF3D7_1434400	26.6662	-1.59353		0.186564
PF3D7_1430900	Q8I6V2	PF3D7_1430900	62.2031	-1.54175		0.186623
PF3D7_0702200	Q8IC45	PF3D7_0702200	1092.48	0.934521		0.186636
PF3D7_1429800	Q8ILG6	PF3D7_1429800	2735.63	0.89175		0.186667
PF3D7_1210100	Q8I5U8	PF3D7_1210100	115.126	-0.991832		0.186667
PF3D7_1211000	Q8I5U0	PF3D7_1211000	115.604	-1.28549		0.186675
PF3D7_1021400	A0A143ZZU2	PF3D7_1021400	668.854	0.905178		0.186855
PF3D7_0715500	Q8IBU5	PF3D7_0715500	62.7335	-1.42203		0.186855
PF3D7_0908400	Q8I367	PF3D7_0908400	36.9422	-1.49048		0.186855
PF3D7_0723200	Q8IBM1	PF3D7_0723200	4.37759	-3.53286		0.186855
PF3D7_1228500	Q8I5D3	PF3D7_1228500	122.72	-1.34197		0.187137
PF3D7_1359400	Q8IDB7	PF3D7_1359400	4265.61	0.850278		0.187158
PF3D7_0607500	C6KSS3	PF3D7_0607500	84.746	-1.08569		0.187158
PF3D7_0623100	C6KT67	PF3D7_0623100	5058.15	0.882116		0.18721
PF3D7_1365300	A0A5K1K935	PF3D7_1365300	275.905	0.989589		0.187472
PF3D7_0209600	O96181	PF3D7_0209600	131.776	-1.51736		0.1879
PF3D7_1214100	Q8I5R4	PF3D7_1214100	215.684	-1.07323		0.188214
PF3D7_1112300	Q8IIP0	PF3D7_1112300	57.4618	-1.3711		0.188214
PF3D7_1304600	Q8IER9	PF3D7_1304600	48.0725	-1.22957		0.188214
PF3D7_0925400	Q8I2Q4	PF3D7_0925400	31.3918	-1.48235		0.188214
PF3D7_0909300	Q8I359	PF3D7_0909300	1076.16	0.883806		0.188282
PF3D7_0529900	Q8I3G9	PF3D7_0529900	1187.91	0.904101		0.188354
PF3D7_0801500	Q8IAL3	PF3D7_0801500	916.442	0.97289		0.188354
PF3D7_1229900	PF3D7_1229900	PF3D7_1229900	108.189	-1.13242		0.188488
PF3D7_0408600	Q9U0K0	PF3D7_0408600	28.6255	-1.58154		0.188825
PF3D7_0102600	B9ZSH8	PF3D7_0102600	555.551	-1.1911		0.189065
PF3D7_1232100	Q8I0V3	PF3D7_1232100	594.059	-0.94762		0.189065
PF3D7_0717600	A0A143ZVJ7	PF3D7_0717600	150.989	-1.26489		0.189126
PF3D7_0824400	Q8IB78	PF3D7_0824400	321.252	-1.01269		0.18918
PF3D7_0921600	Q8I2T7	PF3D7_0921600	661.056	0.942382		0.189351
PF3D7_0528600	C0H4G5	PF3D7_0528600	463.014	0.918012		0.190286
PF3D7_1453200	Q8IKU5	PF3D7_1453200	54.103	-1.46602		0.190286
PF3D7_0721200	Q8IBN9	PF3D7_0721200	226.361	1.00201		0.190286
PF3D7_1417800	Q8ILR7	PF3D7_1417800	853.328	-1.34335		0.190385
PF3D7_1233400	A0A144A1C7	PF3D7_1233400	978.478	0.92337		0.190385
PF3D7_1313600	Q8IEH7	PF3D7_1313600	16.7089	-2.03149		0.190385
PF3D7_0418300	Q8I1Q4	PF3D7_0418300	11494.8	0.837402		0.190868
PF3D7_1023800	Q8IJG7	PF3D7_1023800	25.8099	-1.89245		0.191068
PF3D7_0507600	Q8I427	PF3D7_0507600	135.548	1.03546		0.191239
PF3D7_0309500	O77330	PF3D7_0309500	3861.58	0.857639		0.191339
PF3D7_0203400	Q8I668	PF3D7_0203400	220.795	-1.38659		0.191345
PF3D7_1411400	Q8ILY1	PF3D7_1411400	117.44	-1.00158		0.191345
PF3D7_0204100	Q9TY98	PF3D7_0204100	280.204	-1.33018		0.191519
PF3D7_0409900	Q8I1V9	PF3D7_0409900	80.953	-1.20802		0.191519
PF3D7_0935200	Q8I2G8	PF3D7_0935200	1826.52	0.823537		0.191556
PF3D7_0907500	Q8I376	PF3D7_0907500	46.6753	-1.4584		0.191556
PF3D7_1131100	Q8II53	PF3D7_1131100	61.7684	-1.22573		0.191556
PF3D7_0710200	Q8IBY8	PF3D7_0710200	2342.63	-1.03484		0.191629
PF3D7_1429100	Q8ILH3	PF3D7_1429100	495.01	-0.951103		0.191629
PF3D7_0510000	Q8I404	PF3D7_0510000	76.6988	-1.58377		0.191629
PF3D7_0414800	C0H4A4	PF3D7_0414800	38.1731	-1.67404		0.191629
PF3D7_1146000	Q8IHQ8	PF3D7_1146000	659.438	0.940378		0.192077
PF3D7_0816200	Q8IAZ9	PF3D7_0816200	74.6811	-1.31048		0.19209
PF3D7_1450000	Q8IKX5	PF3D7_1450000	234.623	0.973332		0.19209
PF3D7_1427800	Q8ILI7	PF3D7_1427800	218.979	0.996505		0.192118
PF3D7_0318400	O77373	PF3D7_0318400	62.3108	-1.08759		0.192234
PF3D7_MIT03200	PF3D7_MIT03200	PF3D7_MIT03200	233.73	-1.23116		0.192287
PF3D7_0317200	O77385	PF3D7_0317200	984.247	-1.33115		0.192512
PCNA	P61074	PF3D7_1361900	780.701	-1.3284		0.192857
PF3D7_0802300	Q8IAM3	PF3D7_0802300	1628.86	0.883269		0.192857
PF3D7_1416800	Q8ILS8	PF3D7_1416800	137.141	-1.09333		0.192857
PF3D7_1454000	Q8IKT8	PF3D7_1454000	337.584	0.87179		0.192857
PF3D7_0618600	C6KT26	PF3D7_0618600	49.4105	-1.23967		0.192857
PF3D7_1212200	Q8I5T0	PF3D7_1212200	39.3047	-1.41895		0.192857
PF3D7_1405600	Q8IM38	PF3D7_1405600	515.216	-1.17695		0.19294
PF3D7_0829100	C0H4Y8	PF3D7_0829100	1164.07	0.878821		0.19294
PF3D7_1425900	Q8ILK4	PF3D7_1425900	532.694	1.08442		0.193176
PF3D7_0816400	C0H4U9	PF3D7_0816400	54.2372	-1.41807		0.193176
PF3D7_0425700	Q8IFK9	PF3D7_0425700	2306.3	1.09267		0.193234
PF3D7_1228400	Q8I5D4	PF3D7_1228400	2716.54	0.885019		0.193259
PF3D7_1019700	Q8IJK5	PF3D7_1019700	247.367	-1.26947		0.193549
PF3D7_0903400	Q8I3B4	PF3D7_0903400	7209.51	0.964599		0.193849
PF3D7_1148700	Q8IHN7	PF3D7_1148700	5912.64	0.983451		0.193849
PF3D7_1225600	A0A143ZZZ3	PF3D7_1225600	2885.51	0.875401		0.193849
PF3D7_0932100	C0H584	PF3D7_0932100	418.531	-1.22985		0.193849
PF3D7_0716000	Q8IBU0	PF3D7_0716000	2596.16	0.822568		0.193849
PF3D7_1464500	Q8IKJ2	PF3D7_1464500	532.732	-0.914781		0.193849
PF3D7_1033900	Q8IJ70	PF3D7_1033900	191.734	-1.38986		0.193849
PF3D7_0917500	Q8I2X8	PF3D7_0917500	249.624	-1.30364		0.193849
PF3D7_0819600	Q8IB31	PF3D7_0819600	304.209	-0.877631		0.193849
PFL1605w	Q8I589	PF3D7_1233300	222.004	-1.33418		0.193849
PF3D7_0829200	Q8IBC3	PF3D7_0829200	234.512	-0.941302		0.193849
PF3D7_1457600	Q8IKQ4	PF3D7_1457600	377.676	0.975621		0.193849
PF3D7_0611400	C6KSV9	PF3D7_0611400	482.108	0.86134		0.193849
PF3D7_1369000	C0H5L4	PF3D7_1369000	77.3401	-1.19522		0.193849
PF3D7_0927200	C0H566	PF3D7_0927200	44.5115	-1.58997		0.193849
PF3D7_1360100	Q8IDA4	PF3D7_1360100	250.617	0.942501		0.193849
PF3D7_1349800	Q8IDK1	PF3D7_1349800	157.063	1.09034		0.193849
PF3D7_MIT00700	PF3D7_MIT00700	PF3D7_MIT00700	44.9417	-1.72386		0.193849
PF3D7_0706200	A0A143ZVJ1	PF3D7_0706200	31.2641	-1.61248		0.193849
PF3D7_1033600	Q7KQL1	PF3D7_1033600	2814.3	0.879674		0.194034
PF3D7_0306500	O97246	PF3D7_0306500	132.861	-1.26443		0.194034
PF3D7_1036900	A0A143ZYL5	PF3D7_1036900	22244.4	0.909154		0.194151
PF3D7_1026600	Q8IJD6	PF3D7_1026600	3061.61	-1.38994		0.194151
PF3D7_1339300	A0A5K1K8I2	PF3D7_1339300	3696.65	0.936678		0.194151
PF3D7_1225700	Q8I5G0	PF3D7_1225700	2229.07	0.868467		0.194151
PF3D7_0621300	C6KT51	PF3D7_0621300	1905.43	0.945763		0.194151
PF14_0511	Q8IKU0	PF3D7_1453800	1686.49	0.912624		0.194151
PF3D7_0630900	C6KTE4	PF3D7_0630900	1534.22	0.91798		0.194151
PF3D7_1321300	Q8IEA1	PF3D7_1321300	1199.33	0.891089		0.194151
PF3D7_0610100	C6KSU8	PF3D7_0610100	1842.64	0.854812		0.194151
PF14_0358	Q7KQM2	PF3D7_1437800	358.464	0.94532		0.194151
PF3D7_0410500	Q9U0I3	PF3D7_0410500	30.8887	-1.37614		0.194151
PF3D7_1246100	Q8I4X1	PF3D7_1246100	21.722	-1.57249		0.194151
PF3D7_0821000	Q8IB44	PF3D7_0821000	98.2313	-1.18488		0.194244
PF3D7_1034600	Q8IJ64	PF3D7_1034600	83.7938	-1.30868		0.194244
PF3D7_1430000	Q8ILG4	PF3D7_1430000	216.576	-0.870172		0.194278
PF3D7_0811600	Q8IAV1	PF3D7_0811600	67.5877	-1.06996		0.194278
PF3D7_1439600	Q8IL73	PF3D7_1439600	56.5023	-1.30376		0.194278
PF3D7_0318200	O77375	PF3D7_0318200	8132.7	0.868346		0.19436
PF3D7_1215400	Q8I5Q2	PF3D7_1215400	153.503	-1.42792		0.19461
PF14_0093	Q8IM00	PF3D7_1409500	30.4235	-1.37641		0.194738
PF3D7_0816800	Q8IB05	PF3D7_0816800	13.8409	-1.76849		0.194738
PF3D7_0918900	Q8I2W4	PF3D7_0918900	1739.44	0.949357		0.194973
PF3D7_0518500	A0A5K1K868	PF3D7_0518500	1373.4	0.876788		0.194973
PF3D7_1110900	Q8IIQ3	PF3D7_1110900	917.971	0.853328		0.194973
PF3D7_0521700	Q8I3P6	PF3D7_0521700	105.694	1.11237		0.194973
PF3D7_1125000	Q8IIB3	PF3D7_1125000	102.564	-1.13538		0.195092
PF3D7_1347500	A0A5K1K8Y8	PF3D7_1347500	17948.1	0.901914		0.195149
PF3D7_0806700	A0A143ZVL6	PF3D7_0806700	1229.56	0.81825		0.195149
PF3D7_0528800	Q8I3H9	PF3D7_0528800	568.468	1.02976		0.195149
PF3D7_1035100	Q8IJ58	PF3D7_1035100	78.4773	-1.63282		0.195149
PF3D7_1015100	Q8IJP4	PF3D7_1015100	264.098	0.943311		0.195149
PF3D7_1202500	A0A144A060	PF3D7_1202500	162.245	1.0028		0.195149
PF3D7_0504300	Q8I458	PF3D7_0504300	8.78945	-2.25831		0.195423
PF3D7_0704100	C0H4K4	PF3D7_0704100	485.561	-1.31713		0.195426
PF3D7_1311000	Q8IEK7	PF3D7_1311000	160.187	1.18726		0.195426
PF3D7_0316400	O77391	PF3D7_0316400	284.423	-1.22791		0.195698
PF3D7_1115300	Q8I6U5	PF3D7_1115300	615.675	1.05663		0.195786
PF3D7_1131200	Q8II52	PF3D7_1131200	175.575	-0.924422		0.195786
MCM7	Q8IC16	PF3D7_0705400	563.322	-1.32127		0.196005
PF3D7_0215700	O96236	PF3D7_0215700	2933.1	0.856714		0.196005
PF3D7_0510100	Q8I403	PF3D7_0510100	600.898	-1.27175		0.196005
PF3D7_1325400	Q8IE65	PF3D7_1325400	350.155	-1.32511		0.196005
PF3D7_0528100	Q8I3I6	PF3D7_0528100	1636.85	0.857231		0.196005
PF3D7_0707900	Q8IC10	PF3D7_0707900	1225.26	0.924426		0.196005
PF3D7_0206200	O96156	PF3D7_0206200	110.124	-1.23054		0.196005
PF3D7_0409500	C0H4A1	PF3D7_0409500	97.642	-1.21965		0.196005
PF3D7_1022900	Q8IJH6	PF3D7_1022900	48.7204	-1.4775		0.196005
PF3D7_0309900	O77332	PF3D7_0309900	64.3757	-1.18111		0.196005
PF3D7_1406400	Q8IM30	PF3D7_1406400	60.8115	-1.18723		0.196005
PF3D7_1108100	Q8IIS1	PF3D7_1108100	30.9313	-1.48949		0.196005
PF3D7_1236300	Q8I560	PF3D7_1236300	30.6291	-1.29979		0.196005
PF3D7_1143000	C6S3G2	PF3D7_1143000	19.6611	-1.62702		0.196005
PF3D7_1136000	Q8II04	PF3D7_1136000	537.484	-1.21669		0.196118
PF3D7_1414700	Q8ILU9	PF3D7_1414700	723.081	0.928302		0.19625
PF3D7_0705500	Q8IC15	PF3D7_0705500	2565.52	0.844356		0.19649
PF3D7_1229100	Q8I5C7	PF3D7_1229100	12690.6	1.02107		0.196879
PF3D7_0414100	Q8I1U6	PF3D7_0414100	62.3593	-1.1371		0.197179
PF3D7_0614700	C6KSY8	PF3D7_0614700	29.1254	-1.73724		0.197281
PF3D7_0909400	Q8I358	PF3D7_0909400	1762.01	0.961134		0.197524
proRS	Q8I5R7	PF3D7_1213800	2015.98	0.937112		0.197524
PF3D7_0705300	Q8IC17	PF3D7_0705300	270.68	-1.26473		0.197524
PF3D7_1237600	A0A144A0C0	PF3D7_1237600	728.939	0.930933		0.197524
PF3D7_0924500	C0H557	PF3D7_0924500	170.789	-0.932031		0.197524
PF3D7_1311600	Q8IEK2	PF3D7_1311600	477.601	0.919498		0.197524
PF3D7_0618100	C6KT21	PF3D7_0618100	77.4229	-1.00402		0.197524
PF3D7_0731800	C0H4Q4	PF3D7_0731800	123.191	0.970307		0.197524
PF3D7_1431100	Q8ILF4	PF3D7_1431100	15.8184	-1.92847		0.197524
PF3D7_0902900	Q8I3B9	PF3D7_0902900	33.8851	-1.33009		0.197524
PF3D7_1230200	PF3D7_1230200	PF3D7_1230200	158.569	-1.13776		0.197582
PF3D7_0721100	Q8IBP0	PF3D7_0721100	1244.64	-1.04511		0.197741
PF3D7_1250000	Q8I4T4	PF3D7_1250000	850.971	0.878556		0.197741
PF3D7_1357400	A0A5K1K8N6	PF3D7_1357400	200.828	-1.11309		0.197741
PF3D7_1030200	Q8IJA3	PF3D7_1030200	108.282	-1.29778		0.197741
PF3D7_0503100	Q8I470	PF3D7_0503100	65.803	-1.16116		0.197741
PF3D7_1207200	Q8I5X3	PF3D7_1207200	35.7194	-1.51021		0.197741
PF3D7_0820700	Q8I6S5	PF3D7_0820700	408.287	-1.18087		0.197771
PF3D7_1438500	Q8IL83	PF3D7_1438500	540.243	0.939973		0.197771
PF3D7_0827000	Q8IBA2	PF3D7_0827000	3346.16	0.87075		0.197861
PF3D7_0822900	Q8IB63	PF3D7_0822900	409.934	-1.24632		0.198037
PF3D7_0418700	Q8I1Q0	PF3D7_0418700	1222.12	0.957296		0.198037
PF3D7_1454300	Q8IKT6	PF3D7_1454300	129.16	-1.12926		0.198037
PF3D7_0827500	C0H4Y5	PF3D7_0827500	111.147	-1.23793		0.198037
PF3D7_0914400	Q8I308	PF3D7_0914400	50.8685	-1.54747		0.198037
PF3D7_0310900	O77357	PF3D7_0310900	54.7183	-1.3989		0.198037
PF3D7_1202800	Q8I617	PF3D7_1202800	205.551	0.969874		0.198037
PF3D7_1130900	Q8II55	PF3D7_1130900	41.9856	-1.22067		0.198037
PF3D7_1319400	A0A5K1K826	PF3D7_1319400	1387.66	-1.11368		0.198295
PF3D7_1317000	Q8I6Z8	PF3D7_1317000	959.072	0.900568		0.198295
PF3D7_1404400	Q8IM50	PF3D7_1404400	53.9597	-1.53061		0.198295
PF3D7_0809500	C0H4T2	PF3D7_0809500	177.136	0.984343		0.198295
PF3D7_0930500	Q8I2K9	PF3D7_0930500	1265.9	0.855432		0.198478
MAL13P1.336	Q8ID39	PF3D7_1366900	10215.8	0.825472		0.1988
PF3D7_1134200	Q8II22	PF3D7_1134200	1375.71	0.929379		0.1988
PF3D7_0723900	Q8IBL4	PF3D7_0723900	1572.27	0.859729		0.1988
PF3D7_0217100	O96252	PF3D7_0217100	251.286	-1.2757		0.1988
PF3D7_0715600	Q8IBU4	PF3D7_0715600	228.191	-1.27955		0.1988
PF3D7_1327400	A0A5K1K8S4	PF3D7_1327400	144.167	-1.25645		0.1988
PF3D7_0927300	Q8I2N6	PF3D7_0927300	111.215	-1.29991		0.1988
PF3D7_0531100	Q8I3F7	PF3D7_0531100	79.0793	-1.49318		0.1988
PF3D7_1440300 Q8IL68	Q8IL68	PF3D7_1440200	69.4853	-1.15531		0.1988
PF3D7_0728700	Q8IBH1	PF3D7_0728700	32.1111	-1.50145		0.1988
PF3D7_1344700	A0A5K1K8X4	PF3D7_1344700	77.9991	1.28042		0.1988
PF3D7_1474200	Q8IK96	PF3D7_1474200	21.1903	-1.76211		0.1988
PF3D7_1326300	A0A5K1K940	PF3D7_1326300	1454.03	0.851628		0.198859
PF3D7_0202500	O96128	PF3D7_0202500	25771	0.962576		0.19894
PF3D7_1442400	Q8IL47	PF3D7_1442400	1121.88	-0.912896		0.198964
PF3D7_1471200	Q8IKC7	PF3D7_1471200	732.564	-0.87959		0.198964
PF3D7_1426900	Q8ILJ5	PF3D7_1426900	130.554	-1.12271		0.199023
PF3D7_1123900	Q8IIC4	PF3D7_1123900	2055.21	0.847592		0.199532
PFE1445c	Q8I3H7	PF3D7_0529000	871.355	0.904174		0.199532
PF3D7_1330100	A0A5K1K9F1	PF3D7_1330100	120.792	-1.10011		0.199532
PF3D7_0727500	Q8IBI2	PF3D7_0727500	80.7237	-1.10905		0.199532
PF3D7_1245500	A0A144A322	PF3D7_1245500	86.2946	-1.40012		0.199575
PF3D7_1343800	C0H5G6	PF3D7_1343800	160.595	-1.20746		0.200026
PF3D7_1339700	A0A5K1K969	PF3D7_1339700	576.052	-1.09579		0.200035
PF3D7_MIT02200	PF3D7_MIT02200	PF3D7_MIT02200	490.392	-0.92518		0.200035
PF3D7_1308800	C0H5A8	PF3D7_1308800	261.218	-1.15457		0.200035
PF3D7_1428200	Q8ILI3	PF3D7_1428200	894.683	0.822601		0.200035
PF3D7_1208300	Q8I0V5	PF3D7_1208300	260.7	-1.09704		0.200035
PF3D7_0819100	Q8IB26	PF3D7_0819100	464.311	0.992603		0.200035
PF3D7_1331300	Q8IE14	PF3D7_1331300	104.368	-1.26706		0.200035
PF3D7_0424900	Q8IFL7	PF3D7_0424900	461.747	0.961153		0.200077
PF3D7_1147300	Q8IHP7	PF3D7_1147300	914.979	-1.20715		0.200204
PF3D7_1442300	Q8IL48	PF3D7_1442300	1605.52	0.895389		0.200224
PF3D7_1128000	PF3D7_1128000	PF3D7_1128000	1533.45	0.83907		0.200393
PF3D7_1462700	Q8I6U9	PF3D7_1462700	266.814	-1.34035		0.200393
PF3D7_0908200	Q8I369	PF3D7_0908200	69.7711	-1.27897		0.200393
PF3D7_0309100	Q9NLA8	PF3D7_0309100	17.8556	-1.51411		0.200393
PF3D7_0405200	Q8I1X7	PF3D7_0405200	247.096	-0.983059		0.200415
PF3D7_1333900	A0A5K1K9F2	PF3D7_1333900	55.6151	-1.20298		0.200517
PF3D7_1446500	Q8IL08	PF3D7_1446500	3685.94	0.879274		0.200769
PF3D7_1227600	Q8I5E2	PF3D7_1227600	465.279	-1.1881		0.200769
PF3D7_1422400	Q8ILM9	PF3D7_1422400	1092.21	0.928293		0.200769
PF3D7_1032400	Q8IJ83	PF3D7_1032400	175.949	-1.30927		0.200769
PF3D7_0519600	Q8I3R4	PF3D7_0519600	747.014	0.830576		0.200769
PF3D7_0315500	O97270	PF3D7_0315500	68.3543	-1.30978		0.200769
PF3D7_1358400	A0A5K1K9A9	PF3D7_1358400	14.2295	-1.6251		0.200769
PF3D7_0527400	Q8I3J1	PF3D7_0527400	474.499	0.991281		0.200837
PF3D7_1332100	Q8IE07	PF3D7_1332100	42.0986	-1.34966		0.200837
PF3D7_1450800	Q8IKW8	PF3D7_1450800	31.0432	-1.31562		0.200837
PF3D7_1021900	Q8IJI4	PF3D7_1021900	3555.3	-1.00819		0.201134
PF3D7_1407100	Q8IM23	PF3D7_1407100	3307.34	0.848174		0.201134
PF3D7_1316900	C0H5C0	PF3D7_1316900	1093.56	0.877711		0.201134
PF3D7_0406400	C0H490	PF3D7_0406400	352.694	0.921942		0.201134
PF3D7_MIT02900	PF3D7_MIT02900	PF3D7_MIT02900	22.3601	-1.69959		0.201134
PF3D7_1336400	Q8IDW7	PF3D7_1336400	162.047	-0.932903		0.20158
PF3D7_1360900	PF3D7_1360900	PF3D7_1360900	511.878	-1.28395		0.201664
PF3D7_0213400	Q7YTF7	PF3D7_0213400	179.594	-1.04152		0.20174
PF3D7_0211500	O96195	PF3D7_0211500	57.973	-1.58892		0.20174
PF3D7_0305600	O97240	PF3D7_0305600	293.298	-1.2756		0.201751
PF3D7_0302800	O77316	PF3D7_0302800	368.441	0.856177		0.201751
PDEdelta	Q8IKD3	PF3D7_1470500	29.2192	-1.66153		0.201751
PF3D7_1339600	A0A5K1K8W6	PF3D7_1339600	66.5086	-1.00552		0.201751
PF3D7_1222400	Q8I5J1	PF3D7_1222400	325.613	-1.02009		0.201777
PF3D7_1431300	Q8ILF2	PF3D7_1431300	1470.65	0.820335		0.202172
PF3D7_1238500	Q8I538	PF3D7_1238500	866.007	-0.855277		0.202173
PF3D7_1410200	Q8ILZ3	PF3D7_1410200	3823.26	0.89828		0.202204
PF3D7_1473700	Q8IKA0	PF3D7_1473700	757.01	0.826391		0.202204
PF3D7_0813700	Q8IAX3	PF3D7_0813700	274.88	-0.863142		0.202204
PF3D7_1439700	Q8IL72	PF3D7_1439700	139.266	-1.04732		0.202204
PF3D7_MIT02300	PF3D7_MIT02300	PF3D7_MIT02300	87.5018	-1.54445		0.202204
PF3D7_1009400	Q8IJV1	PF3D7_1009400	224.587	0.996022		0.202204
PF3D7_MIT00300	PF3D7_MIT00300	PF3D7_MIT00300	50.9455	-1.59341		0.202204
PF3D7_1450900	Q8IKW7	PF3D7_1450900	41.7455	-1.38368		0.202204
PF3D7_1466500	C6S3K1	PF3D7_1466500	3.9365	-3.36536		0.202204
PF3D7_0424200	C0H496	PF3D7_0424200	226.006	-1.18325		0.202276
PF3D7_1330300	C0H5E9	PF3D7_1330300	263.304	-0.888953		0.202426
PF3D7_1410600	Q8ILY9	PF3D7_1410600	7471.79	0.811597		0.202652
PF3D7_0416400	C0H4A7	PF3D7_0416400	1028.77	-1.03683		0.203058
PF3D7_1131800	Q8II47	PF3D7_1131800	1055.26	-0.849823		0.203058
PF3D7_0919000	Q8I2W3	PF3D7_0919000	7251.73	0.800332		0.203128
PF3D7_1317100	Q8IEE5	PF3D7_1317100	1032.84	-1.21842		0.203128
PF3D7_1124600	Q8IIB7	PF3D7_1124600	427.219	-1.03892		0.203128
PF3D7_0206500	O96158	PF3D7_0206500	1145.07	0.773674		0.203128
PF3D7_0725100	Q8IBK0	PF3D7_0725100	823.552	0.873446		0.203128
PF3D7_0109800	Q8I246	PF3D7_0109800	628.463	0.85767		0.203128
PF3D7_1363700	A0A5K1K8R3	PF3D7_1363700	100.665	-1.08386		0.203128
PF3D7_1112900	A0A143ZZU6	PF3D7_1112900	17.3164	-2.17485		0.203128
PF3D7_0531300	Q8I3F5	PF3D7_0531300	66.8539	-1.32767		0.203346
PF3D7_1453000	Q8IKU7	PF3D7_1453000	368.857	0.890734		0.203346
PF3D7_0821500	Q8IB49	PF3D7_0821500	274.039	1.01402		0.20353
PF3D7_0912800	Q8I324	PF3D7_0912800	1313.03	0.885128		0.203936
PF3D7_1329100	Q8IE50	PF3D7_1329100	985.218	-0.80359		0.204053
PF3D7_0314500	O97261	PF3D7_0314500	1399.39	0.913566		0.204053
PF3D7_1342400	Q8IDR5	PF3D7_1342400	1868.61	0.847277		0.204053
PF3D7_1240200	PF3D7_1240200	PF3D7_1240200	121.056	4.23862		0.204053
PF3D7_0205000	O96146	PF3D7_0205000	76.3008	-1.30481		0.204053
PF3D7_MIT01400	PF3D7_MIT01400	PF3D7_MIT01400	65.9554	-1.32391		0.204053
PF3D7_1006400	Q8IJX7	PF3D7_1006400	32.5349	-1.40804		0.204053
PF3D7_1417900	C6S3H7	PF3D7_1417900	72.7623	-1.38529		0.204189
PF3D7_0605500	C6KSQ3	PF3D7_0605500	37.6811	-1.46948		0.20432
PF3D7_1000600	Q8IK32	PF3D7_1000600	53.2367	-1.12718		0.20432
PF3D7_1207000	Q8I5X5	PF3D7_1207000	936.656	-1.199		0.204611
PF3D7_0211100	O96192	PF3D7_0211100	31.62	-1.38859		0.204611
PF3D7_1009000	Q8IJV5	PF3D7_1009000	421.675	1.0071		0.205011
PF3D7_0419100	Q8I1P6	PF3D7_0419100	35.1045	-1.20558		0.205011
PF3D7_1211100	Q8I5T9	PF3D7_1211100	23.949	-1.37631		0.205011
PF3D7_1449400	Q8IKY1	PF3D7_1449400	219.275	-1.27988		0.205223
PF3D7_0511300	Q8I3Z3	PF3D7_0511300	91.1581	-1.01468		0.205223
PF3D7_1347700	Q8IDM2	PF3D7_1347700	1354.34	0.853788		0.205312
PF3D7_1372000	C0H5M7	PF3D7_1372000	778.221	1.08802		0.205342
PF3D7_1405400	Q8IM40	PF3D7_1405400	103.309	-1.02805		0.205342
PF3D7_1411000	PF3D7_1411000	PF3D7_1411000	279.337	-1.32563		0.205659
PF3D7_1463200	Q8IKK4	PF3D7_1463200	203.135	-1.29102		0.205659
PF3D7_0913600	Q8I316	PF3D7_0913600	151.562	-1.25426		0.205694
PF3D7_1476000	Q8IK78	PF3D7_1476000	232.515	1.05304		0.205694
PF3D7_1121500	Q8IIF1	PF3D7_1121500	24.8396	-1.4609		0.205694
PF3D7_0424600	Q8IFM0	PF3D7_0424600	3227.85	0.843554		0.206283
PF3D7_0801000	Q8IAK9	PF3D7_0801000	7747.41	0.894736		0.206685
PF3D7_1037000	A0A143ZYZ7	PF3D7_1037000	265.865	-1.08862		0.206685
PF3D7_0609900	C6KSU6	PF3D7_0609900	265.845	0.833462		0.206685
PF3D7_1433200	Q8ILD1	PF3D7_1433200	37.2203	-1.24487		0.206685
PF3D7_1112100	Q8IIP2	PF3D7_1112100	812.55	-1.08003		0.206888
PF3D7_0419300	Q8I1P4	PF3D7_0419300	180.547	-1.00015		0.207024
PF3D7_0306100	O97243	PF3D7_0306100	608.06	0.847232		0.207024
PF3D7_0627700	C6KTB3	PF3D7_0627700	3414.74	0.815932		0.207332
PF3D7_0403700	Q8I1Z2	PF3D7_0403700	1973.42	0.827536		0.207332
PF07_0047	P46468	PF3D7_0711000	622.969	-0.878474		0.207643
PF3D7_1471600	Q8IKC3	PF3D7_1471600	7.8743	-2.74343		0.207643
PF3D7_1444100	Q8IL30	PF3D7_1444100	269.11	-1.10925		0.207786
PF3D7_0614900	C6KSZ0	PF3D7_0614900	223.733	-1.3531		0.207898
PF3D7_0522300	C0H4F7	PF3D7_0522300	889.457	0.782541		0.207898
PF3D7_0724900	Q8IBK2	PF3D7_0724900	38.2188	-1.58984		0.207977
PF3D7_1147800	PF3D7_1147800	PF3D7_1147800	896.646	0.87106		0.208556
PF3D7_1462300	Q8IKL1	PF3D7_1462300	2347.72	0.825213		0.208668
PF3D7_0813600	Q8IAX2	PF3D7_0813600	1541.82	0.78114		0.208668
PF3D7_0805600	A0A143ZY93	PF3D7_0805600	609.008	0.826279		0.208821
PF3D7_0726050	A0A5K1K8M1	PF3D7_0726050	237.283	0.967633		0.208829
PF3D7_1306500	C0H5A3	PF3D7_1306500	51.0386	-1.10237		0.208829
PF3D7_0626700	C6KTA3	PF3D7_0626700	1276.55	0.829429		0.20908
PF3D7_0504800	C0H4C4	PF3D7_0504800	401.517	-1.24805		0.209228
PF3D7_0302600	O77308	PF3D7_0302600	92.5369	-1.30457		0.209228
PF3D7_1430400	Q8ILG0	PF3D7_1430400	141.89	0.984966		0.209228
PF3D7_1133200	Q8II32	PF3D7_1133200	1582.91	-1.25617		0.209329
PF3D7_0821200	Q8IB46	PF3D7_0821200	239.038	0.835908		0.209425
PF3D7_0415300	Q8I1T4	PF3D7_0415300	3614.95	0.78771		0.209481
PF3D7_1460900	PF3D7_1460900	PF3D7_1460900	43.7162	-1.29362		0.209481
PF3D7_0612000	C6KSW4	PF3D7_0612000	217.549	-0.893913		0.209636
PF3D7_1133000	Q8II34	PF3D7_1133000	36.5795	1.23296		0.209784
PF3D7_0617300	C6KT14	PF3D7_0617300	57.7887	-1.25384		0.209887
PF3D7_1454200	Q8IKT7	PF3D7_1454200	210.477	1.07774		0.210021
PF3D7_1227300	Q8I5E5	PF3D7_1227300	35.6487	-1.5945		0.210137
PF3D7_0707700	Q8IC12	PF3D7_0707700	1680.81	0.851085		0.210421
PF3D7_0909000	Q8I362	PF3D7_0909000	11.7947	-2.03956		0.210421
PF3D7_1335700	Q8IDX3	PF3D7_1335700	178.761	-1.09139		0.210854
PF3D7_0312200	O77346	PF3D7_0312200	16.2887	-1.62561		0.211185
PF3D7_0215400	O96233	PF3D7_0215400	1757.22	0.844927		0.21135
PF3D7_0411000	Q9U0H8	PF3D7_0411000	623.113	0.872182		0.211419
PF3D7_0315600	O97271	PF3D7_0315600	56.871	-1.3783		0.211462
PF3D7_0413300	Q8I1V4	PF3D7_0413300	5.81893	2.54887		0.211744
PF3D7_1133300	Q8II31	PF3D7_1133300	44.985	-1.61153		0.211751
PF3D7_0915000	Q8I302	PF3D7_0915000	125.045	-1.20462		0.211816
PF3D7_0320200	C0H481	PF3D7_0320200	41.4319	-1.26508		0.211829
PF3D7_1325900	A0A5K1K8R5	PF3D7_1325900	313.156	-1.22623		0.211938
trx2	Q8IDP4	PF3D7_1345100	453.286	0.992118		0.211938
PF3D7_0215600	O96235	PF3D7_0215600	557.039	0.783948		0.212209
PF3D7_1239600	Q8I527	PF3D7_1239600	95.8962	-0.966461		0.212415
PF3D7_0811500	A0A5K1K956	PF3D7_0811500	388.28	0.927744		0.212817
PF3D7_0410100	PF3D7_0410100	PF3D7_0410100	3.87176	3.02444		0.212817
PF3D7_1330700	A0A5K1K957	PF3D7_1330700	71.3708	-1.13529		0.21294
PF3D7_1362800	C0H5K3	PF3D7_1362800	88.1591	-1.34756		0.213139
PF3D7_0208500	Q7KWJ1	PF3D7_0208500	50.7102	-1.28023		0.213242
PF3D7_0625300	C6KT89	PF3D7_0625300	245.007	-1.17903		0.213376
PF3D7_0105000	PF3D7_0105000	PF3D7_0105000	28.7164	1.32607		0.213405
PF3D7_1138600	Q8IHX9	PF3D7_1138600	474.66	0.806642		0.2136
PF3D7_1010200	Q8IJU3	PF3D7_1010200	2250.95	0.853488		0.213783
PF3D7_0923800	PF3D7_0923800	PF3D7_0923800	436.513	-1.16529		0.213783
PF3D7_1111100	Q8IIQ1	PF3D7_1111100	291.617	-1.17197		0.213783
PF3D7_1460500	Q8IKM7	PF3D7_1460500	296.478	-0.991529		0.213783
PF3D7_0817800	Q8IB13	PF3D7_0817800	40.4056	-1.6356		0.213783
PF3D7_1031500	Q8IJ90	PF3D7_1031500	988.622	0.774087		0.2142
PF3D7_1312700	Q8IEJ5	PF3D7_1312700	281.175	-0.946971		0.214201
PF3D7_0608300	C6KST1	PF3D7_0608300	156.774	-1.05994		0.214586
PF3D7_0506200	Q8I440	PF3D7_0506200	107.29	0.955692		0.214586
PF3D7_1359100	Q8IDB3	PF3D7_1359100	239.967	0.858815		0.215153
PF3D7_1105300	Q8IIU9	PF3D7_1105300	90.6612	-0.980597		0.215192
PF3D7_0407200	Q9U0L4	PF3D7_0407200	277.648	0.859673		0.215192
PF3D7_0906100	Q8I388	PF3D7_0906100	125.856	-1.24878		0.215343
PF3D7_1117300	Q8IIJ4	PF3D7_1117300	113.132	1.14985		0.215468
PF3D7_0206300	PF3D7_0206300	PF3D7_0206300	6295.68	0.814281		0.215505
PF3D7_0829400	C0H4Z0	PF3D7_0829400	280.603	-0.955098		0.215505
PF3D7_1407700	Q8IM17	PF3D7_1407700	127.208	-1.33407		0.215505
PF3D7_0111900	Q8I227	PF3D7_0111900	145.944	-0.935925		0.215505
PF3D7_1222900	Q8I5I6	PF3D7_1222900	57.6525	-1.16023		0.215505
PF3D7_1340100	A0A5K1K8M9	PF3D7_1340100	182.416	0.951789		0.215587
PF3D7_0727100	C0H4P6	PF3D7_0727100	59.5632	-1.13419		0.215587
PF3D7_0825300	Q8IB87	PF3D7_0825300	41.9104	-1.11438		0.215587
PF3D7_0824100	Q8IB75	PF3D7_0824100	38.2813	-1.38807		0.215657
PF3D7_1343500	A0A5K1K8C4	PF3D7_1343500	71.3611	-1.20106		0.21584
PF3D7_0208600	O96173	PF3D7_0208600	278.683	-1.13698		0.216545
PF3D7_0313900	O97257	PF3D7_0313900	47.4838	-1.36125		0.216545
PF3D7_1015000	Q8IJP5	PF3D7_1015000	48.6309	-1.21895		0.216545
PF3D7_0920600	Q8I2U7	PF3D7_0920600	101.339	-1.18389		0.216643
PF3D7_0407000	Q9U0L6	PF3D7_0407000	134.737	1.05572		0.216643
PF3D7_1418300	Q8ILR3	PF3D7_1418300	55.1315	-1.08037		0.216643
PF3D7_1339000	A0A5K1K8Y9	PF3D7_1339000	7.94458	-2.1144		0.216946
PF3D7_1342700	Q8IDR2	PF3D7_1342700	196.522	0.982184		0.216966
PF3D7_0731600	Q8I6Z1	PF3D7_0731600	2158.84	-0.742965		0.217024
PFC0760c	O77384	PF3D7_0317300	2807.18	0.792621		0.217024
PF3D7_0610200	C6KSU9	PF3D7_0610200	3492.25	0.761446		0.217024
PF3D7_0925700	Q7K6A1	PF3D7_0925700	1155.23	0.841976		0.217024
PF3D7_0504600	Q8I0X1	PF3D7_0504600	78.4624	-1.32581		0.217024
PF3D7_0420600	A0A146LZZ4	PF3D7_0420600	102.32	-1.30295		0.217024
PF3D7_0321200	O97321	PF3D7_0321200	47.2151	-1.32036		0.217024
PF3D7_1116900	A0A144A0T9	PF3D7_1116900	11.3036	-1.96294		0.217024
PF3D7_1308700	Q8IEM7	PF3D7_1308700	284.818	-1.09424		0.217618
PF3D7_1037100	Q8IJ37	PF3D7_1037100	357.209	-0.80484		0.217618
PF3D7_1438800	A0A144A3K9	PF3D7_1438800	19.2849	-1.90202		0.217656
PF3D7_0727200	Q8IBI5	PF3D7_0727200	669.455	0.874317		0.217672
PF3D7_0828300	Q8IBB4	PF3D7_0828300	454.702	-0.809054		0.217702
HDP	Q8IL04	PF3D7_1446800	92.2663	-1.21075		0.217702
PF3D7_0522700	Q8I3N6	PF3D7_0522700	27.8767	-1.31216		0.217702
PF3D7_1203700	Q8I608	PF3D7_1203700	9117.71	0.794534		0.217874
PF3D7_1116500	Q8IIK1	PF3D7_1116500	95.3987	-0.980811		0.218173
PF3D7_1359000	C0H5J0	PF3D7_1359000	1089.47	0.938491		0.218306
PF3D7_1024900	Q8IJF5	PF3D7_1024900	116.961	-1.03746		0.218561
PF3D7_0202900	A0A146M427	PF3D7_0202900	17.2788	-1.73866		0.218997
PF3D7_1309300	Q8IEM1	PF3D7_1309300	2587.62	0.829306		0.219352
PF3D7_0524600	Q8I3L9	PF3D7_0524600	158.611	-1.1437		0.219352
PF3D7_1015400	Q8IJP1	PF3D7_1015400	152.823	-1.01703		0.219352
PF3D7_1008800	Q8IJV7	PF3D7_1008800	5654.16	0.791738		0.21941
PF3D7_0816600	Q8IB03	PF3D7_0816600	577.63	-0.949021		0.21941
PF3D7_0106800	Q8I274	PF3D7_0106800	70.5516	-1.12112		0.21941
PF3D7_0632500	C6KTF7	PF3D7_0632500	13497.3	5.65668		0.219637
PF3D7_1428300	Q8ILI2	PF3D7_1428300	2841.2	0.777295		0.219637
PF3D7_0207700	O96164	PF3D7_0207700	306.303	-1.47092		0.219637
PF3D7_0730200	Q8IBF8	PF3D7_0730200	178.802	0.980572		0.219637
PF3D7_1310000	Q8IEL5	PF3D7_1310000	8.93208	-2.09625		0.219637
PF3D7_1226600	Q7KQJ9	PF3D7_1226600	104.323	-1.0145		0.220161
PF3D7_1452500	Q8IKV1	PF3D7_1452500	53.7047	-1.1941		0.220161
PF3D7_1018700	Q8IJL5	PF3D7_1018700	1470.95	0.911098		0.22029
PF3D7_0920800	Q8I2U5	PF3D7_0920800	3108.85	0.861756		0.220342
PF3D7_0210200	A0A143ZWL6	PF3D7_0210200	894.174	-0.932878		0.220342
PF3D7_0721300	Q8IBN8	PF3D7_0721300	2226.14	0.816765		0.220342
PF3D7_1235900	A0A144A2S8	PF3D7_1235900	2219.31	0.781772		0.220342
PF3D7_0718100	Q8IBR9	PF3D7_0718100	311.996	-1.2428		0.220342
PF3D7_0413700	Q8I1V0	PF3D7_0413700	371.276	-1.00712		0.220342
PF3D7_0308600	O77325	PF3D7_0308600	1178.09	0.837315		0.220342
PF3D7_1103400	Q8IIW9	PF3D7_1103400	279.356	-0.944062		0.220342
PF3D7_0809200	Q8IAS8	PF3D7_0809200	562.112	0.86427		0.220342
PF3D7_0902700	PF3D7_0902700	PF3D7_0902700	166.995	-1.03919		0.220342
PF3D7_1326400	A0A5K1K977	PF3D7_1326400	363.613	0.956075		0.220342
PF3D7_1415000	Q8ILU6	PF3D7_1415000	84.8532	-1.26574		0.220342
PF3D7_1145500	Q8IHR3	PF3D7_1145500	91.8394	-1.19606		0.220342
PF3D7_1457500	Q8IKQ5	PF3D7_1457500	79.8248	-1.16336		0.220342
PF3D7_1463700	Q8IKK0	PF3D7_1463700	196.665	0.906939		0.220342
PF3D7_1371700	A0A143ZWL4	PF3D7_1371700	58.9118	-1.21036		0.220342
PF3D7_0622400	C6KT61	PF3D7_0622400	59.9714	-1.17322		0.220342
PF3D7_1349100	Q8IDK8	PF3D7_1349100	27.8687	-1.54678		0.220342
PF3D7_0826200	Q8IB95	PF3D7_0826200	14.5328	-1.66388		0.220342
PF3D7_1355100	Q8IDF0	PF3D7_1355100	736.568	-1.10206		0.22054
PF3D7_1137500	Q8IHZ0	PF3D7_1137500	110.014	-1.36811		0.22054
PF3D7_1474100	Q8IK97	PF3D7_1474100	114.179	-1.25854		0.22054
PF3D7_0310800	O77359	PF3D7_0310800	374.818	0.892558		0.22054
PF3D7_1348700	A0A5K1K923	PF3D7_1348700	5.14733	-3.34512		0.22054
PF3D7_1337500	A0A5K1K8Y0	PF3D7_1337500	2994.94	0.804374		0.220621
PF3D7_0702400	Q8IC43	PF3D7_0702400	2305.19	0.996842		0.220621
PF3D7_0525200	Q8I3L3	PF3D7_0525200	540.687	-0.915287		0.220621
PF3D7_1113300	Q8IIM9	PF3D7_1113300	130.988	-1.13362		0.220621
PF3D7_0505200	Q8I450	PF3D7_0505200	123.605	-0.901241		0.220621
PF3D7_1113800	Q8IIM4	PF3D7_1113800	87.8743	-1.07698		0.220621
PF3D7_1137200	Q8IHZ3	PF3D7_1137200	49.2398	-1.33302		0.220621
PF3D7_1369700	C0H5L8	PF3D7_1369700	185.758	0.957744		0.220621
PF3D7_MIT02800	PF3D7_MIT02800	PF3D7_MIT02800	23.615	-1.57756		0.220621
PF3D7_1462200	Q8IKL2	PF3D7_1462200	22.6152	-1.49261		0.220621
PF3D7_1339500	A0A5K1K9F4	PF3D7_1339500	20.9575	-1.44145		0.220621
PF3D7_1221100	PF3D7_1221100	PF3D7_1221100	15.7499	-1.60577		0.220621
PF3D7_0901800	C0H512	PF3D7_0901800	123.583	-0.958		0.220926
PF3D7_1415500	A0A144A1F5	PF3D7_1415500	37.8587	-1.26851		0.220926
PF3D7_0626000	C6KT96	PF3D7_0626000	830.782	0.915942		0.221032
PF3D7_0323300	O97301	PF3D7_0323300	11.6519	-1.75217		0.221187
PF3D7_1223400	Q8I5I3	PF3D7_1223400	12283.9	0.805322		0.221265
PF3D7_0419800	Q8I1P0	PF3D7_0419800	1199.1	0.893865		0.221265
PF3D7_0111300	Q8I233	PF3D7_0111300	376.27	-1.08031		0.221265
PF3D7_0615500	C6KSZ6	PF3D7_0615500	218.982	-1.24617		0.221265
PF3D7_MIT00200	PF3D7_MIT00200	PF3D7_MIT00200	36.2604	-1.51789		0.221265
PF3D7_0818500	Q8IB20	PF3D7_0818500	2408.37	0.750115		0.221327
PF3D7_0515000	Q8I3V8	PF3D7_0515000	3549.85	0.759852		0.221458
PF3D7_1246800	Q8I4W4	PF3D7_1246800	415.107	-0.920982		0.221458
PF3D7_1351900	A0A5K1K9A6	PF3D7_1351900	1208.55	0.794204		0.221458
PF08_0048	C0H4W3	PF3D7_0820000	2697.06	0.777422		0.222068
[truncated: 3,721 more rows]

## Sheet: Raw Reads
	SLI-3D7MEEDvar0425800-HA_1	SLI-3D7MEEDvar0425800-HA_2	SLI-3D7MEEDvar0425800-HA_3	SLI-3D7var0425800-HA_1	SLI-3D7var0425800-HA_2	SLI-3D7var0425800-HA_3
PF3D7_1314600	33	49	71	128	60	63
PF3D7_0621350	18	24	24	16	31	9
PF3D7_0209400	91	190	243	337	274	239
PF3D7_1142200	0	4	6	6	14	15
PF3D7_0507200	51	57	66	57	399	219
PF3D7_0806000	502	517	551	571	543	428
PF3D7_1006800	6596	7201	6161	5519	6194	4549
PF3D7_0412000	35	194	205	289	299	749
PF3D7_0732200	0	0	0	0	0	1
PF3D7_0324800	52	107	83	15	109	70
PF3D7_1227500	53	504	618	394	1278	2713
PF3D7_0301800	982	x	1192	202	1074	630
PF3D7_0920900	603	712	800	859	856	641
PF3D7_1443600	0	24	36	50	27	81
PF3D7_0415900	8617	11648	11241	10343	12971	7442
PF3D7_0214100	6451	7840	6035	2993	7185	3413
PF3D7_0726100	6400	7891	5295	1938	5310	1474
PF3D7_0717700	5715	5504	4792	4243	6197	3118
PF3D7_1342200	3	31	33	132	38	67
PF3D7_1400700	0	0	2	0	0	4
PF3D7_1322800	0	2	7	23	14	18
PF3D7_1477400	14	37	78	5	28	21
PF3D7_1106700	436	533	557	579	581	532
PF3D7_0621100	45	78	100	74	342	747
PF3D7_1040800	0	0	0	0	0	0
PF3D7_0909100	4	8	12	5	50	139
PF3D7_1342400	2217	2136	1703	1675	1631	1411
PF3D7_1028500	1137	1157	1008	766	1005	662
PF3D7_1419100	1936	1888	1696	1051	1640	755
PF3D7_1448500	113	997	903	1179	1505	2939
PF3D7_1125000	21	92	71	92	132	299
PF3D7_1468000	17	51	45	38	39	132
PF3D7_0500900	10	17	23	26	79	82
PF3D7_1207600	381	508	558	702	552	509
PF3D7_0311400	5	18	29	5	47	143
PF3D7_0722200	35	161	179	51	808	2742
PF3D7_API02500	0	0	0	0	0	0
PF3D7_0515900	19	46	47	100	61	80
PF3D7_0319500	1381	1399	1403	1230	1227	1100
PF3D7_1450000	320	206	240	148	217	208
PF3D7_0300600	0	0	0	0	0	0
PF3D7_1443900	197	381	352	740	450	588
PF3D7_1222800	0	9	8	11	10	35
PF3D7_1470100	608	783	650	799	681	528
PF3D7_0519700	4813	4077	3969	2012	4227	1454
PF3D7_1469700	19	115	96	205	134	297
PF3D7_1455700	6	86	114	131	158	371
PF3D7_1132100	6	5	4	8	47	17
PF3D7_0532200	40	36	71	60	181	105
PF3D7_0508700	2122	2223	1818	1768	2393	1765
PF3D7_1227400	755	758	810	619	636	730
PF3D7_1126200	4877	6160	5759	7059	6819	4415
PF3D7_1242500	4	68	58	87	90	184
PF3D7_0806700	1225	1467	1402	940	1373	881
PF3D7_0911100	110	180	190	45	934	1927
PF3D7_0303500	21	238	207	250	270	484
PF3D7_0422800	0	26	40	38	58	52
PF3D7_0926300	36	147	114	104	230	453
PF3D7_1436400	5	22	25	48	25	33
PF3D7_1215600	0	40	59	37	46	158
PF3D7_0808700	165	322	314	36	95	86
PF3D7_1444700	16	67	62	70	78	144
PF3D7_1209600	0	6	0	6	9	42
PF3D7_0523800	668	617	517	194	462	199
PF3D7_1459700	9	123	47	106	132	156
PF3D7_1409000	253	292	306	334	259	176
PF3D7_1028900	4	6	10	3	19	67
PF3D7_1447100	900	828	981	663	682	549
PF3D7_1366000	185	154	171	206	253	99
PF3D7_1026000	2351	2066	3632	3917	2968	2990
PF3D7_0919800	469	853	894	338	1075	1571
PF3D7_0205000	9	70	50	72	62	269
PF3D7_1354200	123	158	171	274	182	269
PF3D7_1353200	5066	5931	4824	2259	5923	1480
PF3D7_0700300	0	1	0	3	2	2
PF3D7_0610800	5428	6680	5559	4921	6603	3561
PF3D7_0914300	567	625	618	496	643	351
PF3D7_1005200	1	2	0	0	3	14
PF3D7_0605000	12	39	42	86	84	94
PF3D7_0410900	338	301	427	346	710	393
PF3D7_1113700	331	333	257	363	243	182
PF3D7_1108800	0	2	0	0	2	1
PF3D7_1129400	2049	1976	2151	2442	2172	1376
PF3D7_1215000	3	33	27	31	78	125
PF3D7_0607000	25464	23744	21308	16304	22566	14287
PF3D7_0519600	802	807	854	677	682	540
PF3D7_1460600	22	19	37	42	86	61
PF3D7_1321700	7055	7153	6173	4798	5616	4813
PF3D7_0820000	2846	2982	2949	2415	2811	1818
PF3D7_0623900	34	121	103	195	387	333
PF3D7_0311900	0	24	21	46	34	55
PF3D7_1372900	0	0	0	0	0	0
PF3D7_0905600	4	8	18	11	11	16
PF3D7_1437700	10	75	76	35	118	208
PF3D7_1307100	844	737	845	564	652	398
PF3D7_1110300	785	998	931	691	972	652
PF3D7_0532400	2669	1769	3769	4437	2194	2669
PF3D7_0527500	8672	9818	7729	8102	8327	6502
PF3D7_0620600	7	13	11	9	28	17
PF3D7_1413400	10	146	117	93	181	427
PF3D7_1214700	22	23	33	29	13	19
PF3D7_1327000	186	270	278	325	263	220
PF3D7_0716300	328	1738	1685	2813	2860	5591
PF3D7_1426600	11	53	47	44	94	234
PF3D7_0210400	11	80	41	186	81	142
PF3D7_0920800	3627	3256	3285	2861	3344	1566
PF3D7_1250000	1018	950	812	763	738	614
PF3D7_1418500	0	0	0	0	2	1
PF3D7_1009200	293	300	320	286	228	169
PF3D7_0921900	4118	4333	3779	2786	3965	2445
PF3D7_1463300	3	71	40	62	42	117
PF3D7_0318400	27	30	50	65	103	143
PF3D7_1321100	26	72	97	36	461	990
PF3D7_1361300	0	3	7	3	9	11
PF3D7_1252900	243	327	344	60	218	50
PF3D7_1244800	2027	2425	2128	2291	2267	1781
PF3D7_1020100	0	2	2	0	9	12
PF3D7_0622600	3	42	77	65	61	186
PF3D7_0525000	36	60	74	228	117	277
PF3D7_0732500	2	0	2	0	0	0
PF3D7_1335300	72	69	87	43	170	392
PF3D7_0207000	46	316	327	211	593	1916
PF3D7_0412300	1	6	20	12	18	18
PF3D7_1433400	1343	3365	3402	4935	5641	5758
PF3D7_1473600	6	51	28	97	44	60
PF3D7_1006900	135	141	176	168	135	205
PF3D7_1014800	2	22	19	7	20	102
PF3D7_1471900	536	585	612	512	830	350
PF3D7_1026600	965	1826	1836	288	7104	9766
PF3D7_0107600	7	21	9	12	62	49
PF3D7_0922100	15053	15667	11888	6850	14748	6007
PF3D7_1471000	380	290	276	377	287	149
PF3D7_1429200	8	47	43	28	90	80
PF3D7_0800100	295	331	151	19	3	0
PF3D7_1416400	45	124	90	32	289	134
PF3D7_0516200	4012	4441	4760	4478	5372	2981
PF3D7_1029600	4304	6291	5941	7103	6197	5636
PF3D7_0517100	23	45	38	81	101	51
PF3D7_1125200	225	282	337	503	417	321
PF3D7_1114800	2	19	20	2	30	88
PF3D7_0520800	226	425	397	637	586	645
PF3D7_0805600	676	644	672	553	552	446
PF3D7_1320900	110	162	184	187	244	171
PF3D7_1242600	300	273	344	359	203	188
PF3D7_0313500	237	222	282	320	224	219
PF3D7_1310700	142	226	251	44	1107	2981
PF3D7_1209900	5	95	68	122	77	188
PF3D7_1302400	11	20	15	4	64	37
PF3D7_1300100	126	381	181	8	1	0
PF3D7_1448000	2281	2170	2023	1539	2209	779
PF3D7_0614200	107	111	141	106	97	70
PF3D7_MIT01700	2	50	16	92	53	128
PF3D7_1221900	4836	4524	4191	2120	4177	1269
PF3D7_0322900	8130	9924	9773	10792	12297	6972
PF3D7_0934100	503	578	578	548	639	628
PF3D7_0918100	1944	3045	1927	1230	2419	1347
PF3D7_1018100	0	8	5	8	13	9
PF3D7_1019400	2383	2774	2863	4271	3715	2376
PF3D7_1211200	934	887	851	553	781	522
PF3D7_0518300	331	528	551	928	663	887
PF3D7_1023200	346	364	439	416	379	202
PF3D7_1222300	1950	3144	3549	5361	4993	6238
PF3D7_0518400	8	5	9	11	21	27
PF3D7_1009400	304	233	201	226	151	142
PF3D7_0630000	0	0	2	0	1	0
PF3D7_1320100	6	61	77	52	107	172
PF3D7_1100700	2	5	4	9	2	0
PF3D7_1302200	2	4	7	2	8	4
PF3D7_1221300	98	239	234	151	257	735
PF3D7_0616800	106	128	212	407	218	356
PF3D7_1429700	353	457	523	704	497	568
PF3D7_1441700	2	12	8	26	11	33
PF3D7_0415300	3776	4147	3898	2901	4001	2588
PF3D7_0806800	5056	4800	4287	3492	5273	3371
PF3D7_1119300	1479	1813	1521	804	1040	905
PF3D7_0222900	0	2	1	0	0	0
PF3D7_0105800	18	289	219	270	462	954
PF3D7_0526600	214	271	138	125	367	301
PF3D7_1423800	1285	1414	1292	838	1660	888
PF3D7_0822100	142	108	205	171	136	84
PF3D7_0924100	214	126	166	214	144	163
PF3D7_0918400	11	58	60	40	50	147
PF3D7_1441000	488	587	546	442	685	319
PF3D7_1015100	346	274	242	162	220	274
PF3D7_0322400	1219	1533	1790	1649	2048	1104
PF3D7_0507500	57	96	81	22	348	572
PF3D7_0521100	0	7	8	8	10	12
PF3D7_1254400	1	0	0	0	0	0
PF3D7_1107400	84	226	236	147	486	317
PF3D7_0810800	657	510	678	1253	769	566
PF3D7_0830900	276	179	602	940	325	429
PF3D7_1438000	5138	5392	4938	3211	5331	2366
PF3D7_0937200	13	20	11	2	13	10
PF3D7_0832100	0	0	2	0	0	0
PF3D7_1471800	3	14	6	13	15	32
PF3D7_1454200	308	174	213	208	185	74
PF3D7_1348600	4	0	8	3	41	81
PF3D7_1203700	9817	11692	8145	7189	10101	6605
PF3D7_1247300	270	353	331	245	365	197
PF3D7_1113100	2220	2395	2325	1866	2837	1565
PF3D7_0928800	19	190	163	261	158	474
PF3D7_0601300	21	10	23	5	1	0
PF3D7_1033200	1093	852	1405	2474	1544	1773
PF3D7_0702500	3628	1899	3308	3400	2029	1463
PF3D7_1362200	789	628	632	749	689	486
PF3D7_MIT00500	0	64	9	89	36	85
PF3D7_1113300	14	122	107	145	140	375
PF3D7_1138500	3348	3141	2792	1655	2661	1755
PF3D7_1421900	6	40	72	70	133	292
PF3D7_1421200	4854	6158	5413	6980	6979	4654
PF3D7_1443800	397	339	338	360	327	375
PF3D7_0100200	0	0	0	0	6	1
PF3D7_0406000	530	359	464	521	407	600
PF3D7_1408300	0	4	3	0	21	12
PF3D7_0816300	31	80	102	47	116	84
PF3D7_1352200	1675	1392	1387	895	1376	606
PF3D7_1122100	2	12	18	11	37	28
PF3D7_1320200	14	60	54	62	129	121
PF3D7_0508200	8	28	49	36	155	276
PF3D7_1121600	7260	8233	8342	14992	11368	12235
PF3D7_1231400	46	74	81	61	291	332
PF3D7_1216500	19	51	64	30	267	703
PF3D7_0532100	14179	17769	19172	28364	23056	19693
PF3D7_1412500	1206	903	1088	1310	1004	741
PF3D7_1322000	11	186	166	187	355	683
PF3D7_1002900	312	386	430	210	382	222
PF3D7_1001200	81	243	229	1021	439	469
PF3D7_1308100	15	62	51	89	58	148
PF3D7_0806300	14	32	74	14	218	486
PF3D7_1249300	605	766	700	866	813	857
PF3D7_1027000	29	49	37	60	103	103
PF3D7_0816000	1429	1550	1313	898	1143	539
PF3D7_0318700	16	28	52	6	107	191
PF3D7_0910600	48	53	67	110	60	129
PF3D7_0104500	592	929	860	1078	1229	724
PF3D7_1249600	4	36	42	26	84	198
PF3D7_0727800	250	558	766	950	984	1071
PF3D7_0504700	180	504	453	336	762	1089
PF3D7_0402200	184	365	452	42	1519	3358
PF3D7_0305200	1314	1363	1521	1498	1546	1412
PF3D7_0607100	25	8	10	16	22	17
PF3D7_1338100	1121	1690	1887	2059	2337	2962
PF3D7_0502800	80	62	112	139	129	35
PF3D7_0705900	84	269	307	446	364	644
PF3D7_1407200	368	228	298	321	194	296
PF3D7_0524900	1342	1283	1171	989	1004	593
PF3D7_1216400	1018	908	726	406	939	535
PF3D7_1132400	283	524	722	1023	895	932
PF3D7_0308700	2	23	17	18	37	184
PF3D7_1241200	1007	1096	1214	1011	1197	942
PF3D7_0611100	0	11	15	11	14	65
PF3D7_1332000	307	246	269	259	312	283
PF3D7_1124400	244	190	280	277	216	104
PF3D7_0531200	0	4	12	24	19	46
PF3D7_0928000	320	320	284	251	481	430
PF3D7_0804300	669	670	557	334	385	149
PF3D7_0617300	17	32	46	28	77	204
PF3D7_0526800	2019	1791	1793	1728	1740	1033
PF3D7_1445600	2744	3778	2977	2015	4440	2293
PF3D7_0424700	13728	11377	13751	6567	12513	5692
PF3D7_1131000	20	141	92	214	94	221
PF3D7_0632700	102	195	138	9	1	0
PF3D7_1461800	76	133	93	43	412	385
PF3D7_1208800	1391	1300	1196	484	1225	491
PF3D7_1442200	32	115	90	113	132	227
PF3D7_1349400	355	395	389	392	434	327
PF3D7_1039900	0	0	2	0	0	0
PF3D7_1018600	3577	4466	3837	2991	5314	2330
PF3D7_0111700	2	0	3	0	1	2
PF3D7_API06700	0	0	0	0	0	0
PF3D7_0727900	454	388	394	223	308	75
PF3D7_1002700	116	201	337	165	255	367
PF3D7_1124600	61	367	396	447	605	1058
PF3D7_0701900	385	922	634	112	867	590
PF3D7_1424700	2	1	0	4	1	0
PF3D7_0903700	14	228	181	265	309	793
PF3D7_0417600	0	14	25	12	47	192
PF3D7_1418100	2	11	26	10	31	27
PF3D7_0628100	21	65	103	29	471	798
PF3D7_1309300	2980	2778	2644	2191	2881	1554
PF3D7_0900700	5	17	10	2	0	0
PF3D7_0710400	49	55	82	141	81	95
PF3D7_1474400	24	48	76	45	157	398
PF3D7_1451200	10402	10529	8166	5229	8342	4967
PF3D7_1455200	10	128	93	169	86	240
PF3D7_1139500	0	6	6	13	6	10
PF3D7_0703300	46	81	73	242	98	139
PF3D7_1411500	1071	1067	1028	710	975	431
PF3D7_1232500	30	69	100	47	347	725
PF3D7_0214600	169	179	237	53	871	2549
PF3D7_1217400	435	632	382	234	1945	1177
PF3D7_1213500	1	7	6	30	23	66
PF3D7_1229900	17	78	103	106	208	235
PF3D7_0913400	17	29	46	28	121	55
PF3D7_0527800	0	0	0	1	0	0
PF3D7_0107900	43	75	91	204	91	73
PF3D7_1439200	60	73	101	73	90	93
PF3D7_0934300	4	22	16	20	31	75
PF3D7_1470950	5	10	6	8	24	9
PF3D7_0203200	256	203	294	137	219	91
PF3D7_1109700	20	14	13	7	9	13
PF3D7_0616100	61	90	110	100	147	96
PF3D7_0805000	37	59	57	54	150	215
PF3D7_1465200	627	649	608	703	681	466
PF3D7_1027100	3374	3019	2473	1506	2479	1164
PF3D7_0514900	478	330	390	286	435	234
PF3D7_1408700	1193	2028	2190	1588	2697	1918
PF3D7_1142500	1480	1615	1685	2439	2029	1118
PF3D7_1121800	6	21	13	7	23	30
PF3D7_1245000	5	18	22	21	27	60
PF3D7_1203600	58	70	59	72	89	81
PF3D7_1135900	267	537	654	462	893	1266
PF3D7_0609500	4	6	10	15	28	15
PF3D7_0415700	0	4	1	6	12	8
PF3D7_0105000	31	28	49	24	25	8
PF3D7_1316800	475	468	645	587	405	548
PF3D7_0928400	376	326	397	353	399	237
PF3D7_0717500	631	774	640	479	1404	1857
PF3D7_1369300	61	49	81	35	80	68
PF3D7_MIT03100	2	49	9	73	26	53
PF3D7_1031900	3	20	12	37	30	34
PF3D7_0529200	4	58	29	45	77	122
PF3D7_1405100	75	175	127	297	204	245
PF3D7_1134700	3163	3044	2953	1882	2976	1167
PF3D7_1442100	6	73	54	135	78	149
PF3D7_1350000	4	1	8	3	17	7
PF3D7_1142700	555	718	748	684	778	429
PF3D7_1111600	2	31	13	26	35	72
PF3D7_1012800	195	184	248	238	273	200
PF3D7_0409500	9	91	74	122	133	243
PF3D7_0218500	610	723	656	678	597	543
PF3D7_0720900	12	83	72	99	97	178
PF3D7_1308200	10381	12419	10804	9299	14038	5877
PF3D7_1302000	3602	2797	2827	359	3	0
PF3D7_0222200	0	0	0	0	1	0
PF3D7_1241800	4114	3781	3447	2235	3156	1787
PF3D7_1032600	10	16	33	44	47	39
PF3D7_1025600	1	118	66	134	74	220
PF3D7_1219700	10	16	11	12	88	64
PF3D7_0531500	2	0	0	0	0	0
PF3D7_1039000	3314	2027	3299	4935	3026	2381
PF3D7_1364400	1228	1288	1194	1169	1211	881
PF3D7_0323700	3152	2993	2782	1705	2190	2234
PF3D7_1337600	0	0	0	0	0	0
PF3D7_0208600	23	268	230	323	339	738
PF3D7_1027600	14	34	29	39	97	65
PF3D7_0928150	10	2	10	8	3	7
PF3D7_0713100	237	223	228	25	5	0
PF3D7_0908000	66	94	207	155	172	298
PF3D7_1203900	758	651	659	770	780	852
PF3D7_0618800	14	36	64	71	44	53
PF3D7_1254600	0	0	2	0	0	0
PF3D7_0210900	4271	5165	4442	4014	4377	2748
PF3D7_1224400	757	676	895	625	814	347
PF3D7_1369700	230	164	224	154	210	83
PF3D7_0306200	264	578	549	778	645	734
PF3D7_1239500	8	68	74	82	121	199
PF3D7_1478800	0	0	0	2	2	0
PF3D7_1427500	31	157	174	202	252	291
PF3D7_0627100	3303	3383	2930	1550	3323	1446
PF3D7_1009300	34	110	128	89	114	126
PF3D7_1113600	860	737	681	464	480	451
PF3D7_0804900	579	577	637	475	618	538
PF3D7_1146600	70	180	161	149	382	712
PF3D7_1368100	109	78	145	248	240	220
PF3D7_0316300	27	492	465	559	782	1921
PF3D7_1467600	798	1316	1423	757	1996	1268
PF3D7_1432600	97	135	170	231	179	152
PF3D7_1102700	11751	13600	11524	5134	13064	4095
PF3D7_1111200	211	214	199	351	257	251
PF3D7_1316400	8	0	7	2	8	9
PF3D7_0714000	2641	3593	3432	2454	4310	7336
PF3D7_0816900	0	5	2	1	4	5
PF3D7_1343100	6	55	40	34	157	212
PF3D7_0932600	2	32	15	38	31	51
PF3D7_0307100	3173	3755	3806	5096	4555	2893
PF3D7_0900900	0	0	0	0	0	0
PF3D7_0111600	26	39	32	47	33	41
PF3D7_0924200	91	155	150	263	182	138
PF3D7_0405300	87	127	80	54	430	185
PF3D7_1401600	3563	3205	3305	2143	4354	2472
PF3D7_1340900	3545	2694	2637	1979	2145	1382
PF3D7_0614900	10	147	225	134	298	782
PF3D7_0209700	2397	2751	2246	1282	2045	863
PF3D7_1227900	163	215	264	284	312	130
PF3D7_1031200	52	51	109	74	310	282
PF3D7_1030400	78	130	117	64	229	115
PF3D7_0108800	67	56	88	140	148	123
PF3D7_1401700	1	0	4	11	21	24
PF3D7_1476600	151	292	286	64	64	119
PF3D7_0415400	757	861	710	492	645	567
PF3D7_0626000	1005	759	979	719	966	349
PF3D7_1253300	811	1313	955	291	677	251
PF3D7_0106400	831	837	789	1064	1192	577
PF3D7_0603000	702	685	744	378	715	388
PF3D7_0610900	3979	3823	3308	2577	3620	2195
PF3D7_1105000	4809	4717	3471	2848	4831	4122
PF3D7_1338600	36	321	331	279	447	1054
PF3D7_0722300	768	823	822	663	968	531
PF3D7_1410200	4361	4381	3951	3346	4229	1859
PF3D7_0606300	0	4	6	2	2	1
PF3D7_0525800	34	96	84	25	546	1163
PF3D7_1026200	16	63	71	141	68	104
PF3D7_1347900	17	122	95	130	126	220
PF3D7_1200700	13668	20905	12772	1941	7783	2722
PF3D7_1317800	7617	9415	8446	9350	11434	6638
PF3D7_0200500	0	0	0	0	0	0
PF3D7_1010500	3	1	3	1	8	16
PF3D7_1243800	262	236	314	349	316	325
PF3D7_1301400	2564	1806	4188	379	0	0
PF3D7_0821000	13	86	77	98	137	269
PF3D7_0526300	774	574	538	433	498	203
PF3D7_0803600	644	760	707	460	889	922
PF3D7_0732400	3	0	5	0	0	0
PF3D7_1338800	2	83	60	107	73	279
PF3D7_1203500	1271	1820	1596	915	1617	971
PF3D7_1147000	0	7	17	4	11	47
PF3D7_1029800	6	132	101	144	165	378
PF3D7_0419100	8	27	25	64	54	55
PF3D7_0401100	0	0	0	0	0	0
PF3D7_1448700	109	96	100	140	64	59
PF3D7_1445300	49	137	120	96	191	193
PF3D7_0213600	27	82	78	67	201	209
PF3D7_1454400	1820	1770	2025	2420	1950	1334
PF3D7_0717300	581	596	712	437	922	536
PF3D7_0609400	205	286	369	508	507	440
PF3D7_0509100	43	667	551	439	880	1892
PF3D7_1470500	1	23	18	12	53	105
PF3D7_1030200	40	61	68	27	194	370
PF3D7_1217100	54	45	80	114	68	76
PF3D7_0717600	28	110	118	64	240	508
PF3D7_1312300	6	63	23	55	44	87
PF3D7_0701600	2	4	2	0	0	0
PF3D7_1463500	587	754	471	157	448	329
PF3D7_0414000	55	683	560	727	763	1618
PF3D7_1212000	85	159	162	239	212	360
PF3D7_1404900	2040	1909	2043	1918	2484	1740
PF3D7_0316900	749	576	723	571	885	397
PF3D7_1115000	2	72	66	80	84	178
PF3D7_0501900	46	65	74	88	96	82
PF3D7_1131500	1	2	2	6	6	19
PF3D7_0610000	3	122	68	83	120	294
PF3D7_1122400	668	596	702	521	573	596
PF3D7_1115300	794	670	618	651	508	211
PF3D7_0811300	20971	23186	19190	10610	23257	10455
PF3D7_1458600	1150	994	1097	559	933	371
PF3D7_1025500	17	102	109	75	175	388
PF3D7_1456700	325	314	318	280	314	251
PF3D7_0529300	7	16	28	58	53	70
PF3D7_0526400	11	29	35	31	65	78
PF3D7_0604000	9	39	20	41	45	54
PF3D7_1305900	57	111	232	376	191	282
PF3D7_1426400	0	0	9	6	3	28
PF3D7_1141000	2	2	13	4	20	10
PF3D7_1433800	13	149	190	137	242	514
PF3D7_0303800	20	72	66	132	79	167
PF3D7_API01700	0	0	0	0	0	0
PF3D7_1472600	8	20	29	22	84	289
PF3D7_0525300	0	8	12	10	12	18
PF3D7_1401500	338	146	488	747	406	262
PF3D7_0702200	1332	1021	1267	638	1348	751
PF3D7_0830500	9443	15184	10036	1573	6024	2941
PF3D7_0502300	0	0	0	0	2	14
PF3D7_1425800	103	241	248	174	334	715
PF3D7_1120200	169	175	216	209	137	219
PF3D7_0727200	777	778	643	708	505	424
PF3D7_1425000	0	2	1	7	6	0
PF3D7_1445800	16	38	24	25	58	63
PF3D7_1405300	3	38	43	74	65	72
PF3D7_1116200	85	79	60	67	80	82
PF3D7_1119700	31	23	38	14	37	29
PF3D7_1471600	0	6	0	2	11	40
PF3D7_0519500	1276	1435	1489	2469	2218	1858
PF3D7_1126100	16	71	76	99	88	141
PF3D7_1101400	0	0	0	0	0	0
PF3D7_API03900	0	0	0	0	0	0
PF3D7_1431900	8	14	27	22	96	145
PF3D7_1234200	71	418	342	487	368	874
PF3D7_1104300	31	165	189	225	204	557
PF3D7_1337800	54	102	101	41	300	428
PF3D7_1440200	13	55	56	120	67	153
PF3D7_1119000	124	322	310	606	487	725
PF3D7_1440300	17	69	74	115	115	143
PF3D7_1361500	2	55	37	24	130	443
PF3D7_0513200	2646	2917	2710	2074	3366	1613
PF3D7_0109800	710	776	578	539	619	427
PF3D7_1120100	13445	13351	12838	14311	15876	8698
PF3D7_0604500	25682	30375	27275	16944	35111	17632
PF3D7_1231200	27	17	27	13	105	299
PF3D7_1225900	4	43	48	65	46	106
PF3D7_1235900	2428	2306	2449	1694	2556	1617
PF3D7_1333000	302	403	434	796	547	629
PF3D7_0914000	155	141	198	208	184	146
PF3D7_1016400	2905	2811	2583	3747	2418	1653
PF3D7_0108400	205	300	327	292	441	245
PF3D7_0817700	14	46	58	31	416	1019
PF3D7_0607300	6	20	21	33	38	95
PF3D7_0111500	31	294	189	339	334	939
PF3D7_1103300	0	0	0	1	0	0
PF3D7_0101500	29	37	72	10	0	0
PF3D7_1348400	24	225	188	324	330	587
PF3D7_1243300	2	2	5	0	4	4
PF3D7_1228000	6	60	53	86	98	193
PF3D7_1314700	44	231	242	416	319	711
PF3D7_1139800	205	191	224	216	257	152
PF3D7_0701300	0	0	0	0	0	0
PF3D7_1403800	43	51	48	56	141	205
PF3D7_0520300	253	260	254	329	221	200
PF3D7_1227100	532	811	721	1199	950	1038
PF3D7_0404900	111	143	193	124	372	607
PF3D7_1415000	6	74	69	82	86	276
PF3D7_1113800	14	69	82	98	108	231
PF3D7_1324700	415	428	308	183	391	267
PF3D7_0505000	476	446	445	450	425	171
PF3D7_0506700	274	225	234	454	259	330
PF3D7_1123000	6196	5413	4889	3381	5894	2815
PF3D7_0104800	29	67	48	53	89	146
PF3D7_1308500	12	37	39	68	70	125
PF3D7_1368800	24	118	151	154	157	434
PF3D7_1367000	226	499	392	680	463	764
PF3D7_0915800	0	6	12	6	10	23
PF3D7_0616700	43	61	84	133	145	170
PF3D7_0915000	16	61	147	86	187	382
PF3D7_0911900	6918	5377	5523	3891	6166	3259
PF3D7_1425300	20	139	124	177	293	678
PF3D7_1222500	212	212	232	169	247	252
PF3D7_1026100	86	114	166	146	214	153
PF3D7_1354700	0	4	8	4	4	12
PF3D7_1222200	1	2	0	0	2	3
PF3D7_1412100	30	240	213	344	263	443
PF3D7_1401900	4	26	34	31	83	238
PF3D7_1101000	1	0	0	0	0	0
PF3D7_0523700	35	54	58	78	161	60
PF3D7_1023500	0	11	11	23	16	42
PF3D7_1024900	21	112	89	215	123	214
PF3D7_1400900	0	0	0	0	0	0
PF3D7_1130000	589	591	387	377	856	474
PF3D7_0705800	7	22	24	34	23	38
PF3D7_0517800	2	8	16	0	45	20
PF3D7_1433300	83	30	104	124	81	142
PF3D7_1361000	318	331	395	399	722	259
PF3D7_0831500	3542	4368	3400	3014	3016	1464
PF3D7_1351300	22	37	14	5	109	51
PF3D7_0725200	496	487	562	555	592	391
PF3D7_0802000	4188	4603	5993	11806	7849	8364
PF3D7_0318900	714	803	1225	1515	1410	1314
PF3D7_0222500	0	2	2	0	0	0
PF3D7_1435100	5	37	67	68	70	102
PF3D7_1351900	1369	1340	1186	851	1420	925
PF3D7_1452800	4	24	12	30	30	36
PF3D7_0406700	10	89	160	121	208	514
PF3D7_1307500	19	4	24	15	93	133
PF3D7_1037300	5108	4403	4385	4299	6546	2541
PF3D7_1348500	4	87	99	118	171	404
PF3D7_1118400	151	185	187	157	304	213
PF3D7_1024100	6	66	60	104	89	234
PF3D7_1007100	0	0	5	4	15	35
PF3D7_0300700	0	0	0	0	2	2
PF3D7_1006400	2	22	29	45	46	81
PF3D7_0808400	97	136	149	130	107	104
PF3D7_1014700	116	268	203	914	350	410
PF3D7_1307600	103	213	189	220	442	716
PF3D7_1344300	24	45	84	51	152	430
PF3D7_0924900	0	1	2	3	11	8
PF3D7_0921500	2	16	8	8	8	10
PF3D7_0821500	341	285	298	224	319	99
PF3D7_0324500	0	0	0	0	0	0
PF3D7_1007700	1772	2763	2954	7579	5023	6516
PF3D7_1336800	1398	1597	1696	1663	1861	1221
PF3D7_0529800	66	506	471	526	799	1714
PF3D7_1366100	79	126	46	16	165	168
PF3D7_1310100	0	20	29	53	48	27
PF3D7_0805300	12	39	43	22	98	161
PF3D7_1117400	61	98	107	179	209	343
PF3D7_1437500	114	103	106	107	82	111
PF3D7_1312100	10	121	130	90	198	462
PF3D7_0801300	13	19	18	8	30	64
PF3D7_1000600	12	43	40	102	65	89
PF3D7_0617900	2626	2626	2441	2058	3238	2826
PF3D7_1350800	0	2	4	0	8	10
PF3D7_1324300	133	272	260	249	642	249
PF3D7_1248600	165	349	274	152	916	533
PF3D7_API05500	0	0	0	0	0	0
PF3D7_1108200	48	93	112	193	117	88
PF3D7_0808100	102	87	134	150	133	111
PF3D7_0715000	345	544	670	633	807	506
PF3D7_1354400	516	598	524	388	584	474
PF3D7_0724900	4	22	30	6	91	125
PF3D7_0217300	172	107	155	127	141	69
PF3D7_0722000	765	899	943	864	826	767
PF3D7_1334700	1468	1818	1563	555	1502	527
PF3D7_1322500	9	93	118	59	328	782
PF3D7_0412100	24	72	55	100	48	131
PF3D7_1464600	6569	6428	6728	6146	7686	6085
PF3D7_1040700	0	0	0	0	0	0
PF3D7_0927200	12	28	21	7	73	178
PF3D7_1420500	2	2	4	5	10	31
PF3D7_1135000	0	2	24	18	13	30
PF3D7_0917800	55	36	44	12	32	26
PF3D7_0901700	42	124	163	246	176	272
PF3D7_0111900	37	139	109	203	179	307
PF3D7_0300100	2	0	0	100	101	254
PF3D7_0223100	65	248	192	5	0	0
PF3D7_0821800	1493	1610	1743	1466	2038	1437
PF3D7_0804800	857	996	844	565	768	417
PF3D7_1407900	5335	5702	5050	2725	5213	1896
PF3D7_1034800	5	70	29	75	55	57
PF3D7_1254200	6	24	29	2	0	2
PF3D7_0218100	2	1	9	4	23	15
PF3D7_1428700	96	59	156	268	160	108
PF3D7_1462000	0	2	0	0	0	1
PF3D7_0826100	6047	7406	8613	7264	10376	4421
PF3D7_API03600	0	0	0	0	0	0
PF3D7_1222000	74	100	68	28	258	91
PF3D7_0807600	6538	7320	6344	5160	7447	4729
PF3D7_1023600	8	27	52	23	42	92
PF3D7_1141600	7	35	59	53	34	66
PF3D7_0520900	4298	6755	6049	8065	8401	8521
PF3D7_1104600	13	17	21	17	9	54
PF3D7_1469400	75	30	121	195	110	78
PF3D7_1400800	0	0	0	0	0	0
PF3D7_0712900	277	276	176	22	12	5
PF3D7_0804100	5	8	3	1	1	4
PF3D7_0724100	5253	6015	5308	4257	5905	5497
PF3D7_1215300	73	142	190	670	292	289
PF3D7_API05000	0	0	0	0	0	0
PF3D7_0105600	110	109	148	134	111	130
PF3D7_1010800	8	28	35	50	22	94
PF3D7_1417000	2	2	6	6	15	3
PF3D7_1350900	38	52	116	86	60	83
PF3D7_1347500	20339	21844	17510	13398	21695	9771
PF3D7_0419900	6758	6774	9316	6310	11810	5458
PF3D7_0815200	2845	2879	2802	2440	3368	1889
PF3D7_1321400	115	63	126	118	156	48
PF3D7_1438800	11	6	2	2	74	41
PF3D7_0602200	253	253	249	563	266	292
PF3D7_1332900	3771	4512	4219	3611	4996	2776
PF3D7_1343300	165	701	601	1191	1259	1725
PF3D7_0922300	6	11	18	9	18	76
PF3D7_1007800	114	176	155	95	564	257
PF3D7_1417300	9	34	32	27	92	194
PF3D7_1106400	2	16	30	49	42	54
PF3D7_1442700	8	127	120	66	221	424
PF3D7_1025100	641	1002	766	347	827	910
PF3D7_0609600	2	2	9	10	17	27
PF3D7_1027800	10159	13580	13383	14791	18163	12084
PF3D7_1040900	0	1	0	0	0	0
PF3D7_1455600	2	28	35	16	58	116
PF3D7_1357500	56	121	142	199	207	264
PF3D7_0832250	4	2	4	1	0	0
PF3D7_0114300	2	46	32	4	2	4
PF3D7_0825600	10	30	26	20	17	53
PF3D7_0721900	189	191	234	160	145	191
PF3D7_0915100	487	558	487	541	451	473
PF3D7_1212300	24	183	154	263	211	428
PF3D7_0702100	249	782	500	67	1027	647
PF3D7_0719000	310	319	416	522	458	297
PF3D7_1131100	11	37	59	65	82	172
PF3D7_0907200	2079	1873	1640	672	1477	517
PF3D7_0917500	12	211	212	262	370	677
PF3D7_0922500	6410	6612	7401	9653	8329	5558
PF3D7_0616400	106	143	170	128	212	159
PF3D7_0808300	935	1089	1121	413	785	1134
PF3D7_1353800	373	458	354	602	457	523
PF3D7_1325600	2	14	45	55	56	77
PF3D7_0729400	1927	1647	1466	1361	1319	798
PF3D7_1339900	11	102	57	108	114	180
PF3D7_0529600	0	0	0	0	2	1
PF3D7_1149300	25	27	37	36	20	25
PF3D7_0313800	18	154	188	277	242	632
PF3D7_1252300	3828	2197	4647	4771	3627	2216
PF3D7_0936400	932	807	1091	442	913	343
PF3D7_API01000	0	0	0	0	0	0
PF3D7_1413000	2	0	0	0	0	6
PF3D7_0819000	2936	3230	2878	2243	3575	1786
PF3D7_0104300	10951	11888	10467	4698	13410	6556
PF3D7_1038600	6	15	28	6	25	18
PF3D7_1200800	539	482	310	140	232	120
PF3D7_0507000	7	13	21	19	36	41
PF3D7_1347600	5	16	16	10	60	107
PF3D7_1408800	6	3	1	4	7	5
PF3D7_1025200	7	25	23	29	27	53
PF3D7_1347000	0	9	12	12	23	48
PF3D7_0720000	294	289	268	249	281	150
PF3D7_0627000	10	26	11	10	40	24
PF3D7_0723700	94	105	143	215	213	206
PF3D7_0932700	12	46	42	85	33	41
PF3D7_1219300	384	321	193	22	25	47
PF3D7_0626800	14402	18328	16408	20497	21623	16148
PF3D7_0618000	7	18	47	18	203	777
PF3D7_1026500	8	5	6	2	49	42
PF3D7_0623600	1324	1525	1297	870	1310	981
PF3D7_0212900	12	149	146	170	277	765
PF3D7_0512600	1113	1120	1073	1079	985	1225
PF3D7_0104400	58	208	211	303	372	525
PF3D7_1402300	1170	1202	1407	1445	1522	1262
PF3D7_0209200	372	354	360	388	230	228
PF3D7_0618100	25	63	55	118	104	147
PF3D7_0425700	2730	3311	1965	748	3625	1140
PF3D7_MIT03400	2	63	11	89	41	101
PF3D7_1223400	13409	14025	12591	8544	15842	7964
PF3D7_0715700	2	9	12	25	12	34
PF3D7_0425100	81	202	189	6	10	0
PF3D7_1135300	50	60	93	50	83	22
PF3D7_1003700	46	67	66	58	156	215
PF3D7_1449000	4	4	4	4	9	48
PF3D7_1345700	434	783	696	1074	932	1044
PF3D7_1251200	85	202	201	35	1284	3432
PF3D7_0928500	740	729	734	688	664	523
PF3D7_0920200	10	221	165	204	248	589
PF3D7_0606000	5733	7073	5843	2672	6360	2456
PF3D7_1303300	54	43	78	99	91	42
PF3D7_1356800	36	85	103	61	341	619
PF3D7_1124700	594	630	677	1198	861	592
PF3D7_1235700	19	304	178	263	202	521
PF3D7_1121100	1874	2563	1868	783	1858	1391
PF3D7_1040500	2	0	0	0	2	2
PF3D7_0220600	584	360	811	1183	656	554
PF3D7_1029700	1	5	8	6	15	20
PF3D7_0933800	6	13	10	10	23	42
PF3D7_0827500	14	78	103	96	119	366
PF3D7_1001000	346	232	540	1448	572	406
PF3D7_1303600	58	37	53	36	48	45
PF3D7_1023400	9	77	70	163	146	306
PF3D7_1031000	3	0	5	2	15	12
PF3D7_0527900	1134	1182	957	788	853	583
PF3D7_0513600	231	1375	1100	2127	1774	2936
PF3D7_0115500	6	3	0	0	0	0
PF3D7_0315900	11	29	20	9	52	10
PF3D7_0718400	58	204	234	430	274	727
PF3D7_1464200	333	408	307	165	267	91
PF3D7_1430400	166	186	128	106	166	68
PF3D7_1301100	0	0	0	0	0	0
PF3D7_1225700	2428	2645	2331	1502	2750	1457
PF3D7_0426000	151	228	127	17	43	110
PF3D7_0522200	302	253	231	307	323	172
PF3D7_0301200	0	0	0	30	245	91
PF3D7_1345500	4	21	22	46	51	88
PF3D7_1102800	51807	57291	34064	13232	40515	14212
PF3D7_0518200	26	36	81	47	192	237
PF3D7_1235000	4	10	10	13	28	25
PF3D7_1128100	584	1079	1116	1708	1313	1747
PF3D7_1418700	1	0	0	0	0	2
PF3D7_0809500	218	173	203	178	115	119
PF3D7_0614600	0	2	4	2	4	20
PF3D7_API03400	0	0	0	0	0	0
PF3D7_1228300	19	462	418	384	612	1533
PF3D7_1210200	2	6	8	2	23	21
PF3D7_0208900	13	12	8	13	40	30
PF3D7_0215500	970	1138	1086	667	1102	666
PF3D7_1340400	2	2	6	4	2	2
PF3D7_0201300	0	0	0	0	0	0
PF3D7_1148700	7044	4596	8363	4830	6648	2598
PF3D7_1247700	0	2	5	4	34	71
PF3D7_1148200	16	47	29	17	74	46
PF3D7_0305700	726	924	1073	866	1234	918
PF3D7_0626600	31	34	35	33	75	46
PF3D7_0930200	4	17	26	9	134	225
PF3D7_0304500	27	82	68	152	61	152
PF3D7_1351400	7429	9574	8397	9954	11593	6878
PF3D7_0110400	1128	986	983	946	1017	807
PF3D7_1354300	8744	9110	7317	5130	7984	3582
PF3D7_1432200	9	36	39	11	168	307
PF3D7_0511300	25	76	69	170	102	155
PF3D7_1417600	4922	5343	5599	3499	6441	3064
PF3D7_1200600	1074	1494	2156	83	133	41
PF3D7_0620100	0	20	12	24	13	42
PF3D7_1034500	20	310	234	287	343	810
PF3D7_0532700	0	0	1	4	4	0
PF3D7_1458000	1900	1851	1611	1016	1713	751
PF3D7_1309100	8214	11230	10821	11204	13424	10738
PF3D7_0519800	2120	1424	1515	1380	1407	805
PF3D7_0825900	6	9	21	34	12	36
PF3D7_0408300	654	706	939	810	766	658
PF3D7_1103400	49	247	262	410	371	534
PF3D7_1005000	74	120	126	123	86	156
PF3D7_1464000	2194	2659	2186	1428	2199	1466
PF3D7_1478900	0	0	0	27	44	30
PF3D7_0314500	1698	1331	1583	1280	1435	696
PF3D7_0926700	408	626	674	1139	1223	664
PF3D7_1353500	75	57	69	116	81	62
PF3D7_1211800	997	1164	1318	1444	2477	3693
PF3D7_1208200	20	14	10	17	52	19
PF3D7_0632000	2	0	0	0	0	0
PF3D7_0316500	47	135	226	215	256	306
PF3D7_1251500	2979	2630	2426	2009	2510	1332
PF3D7_API02600	0	0	0	0	0	0
PF3D7_0709100	52	361	379	311	516	1192
PF3D7_0115200	0	0	0	0	0	0
PF3D7_0305900	0	2	7	4	9	10
PF3D7_1450300	317	248	370	294	449	152
PF3D7_0614800	45	352	286	715	370	731
PF3D7_1011400	292	309	265	590	291	472
PF3D7_0933900	381	466	465	364	381	427
PF3D7_1117200	13	24	32	26	60	95
PF3D7_1335600	172	76	117	97	85	37
PF3D7_1350200	446	297	357	282	301	167
PF3D7_0504600	10	36	86	32	118	278
PF3D7_0932300	552	691	842	1533	1022	792
PF3D7_0320400	17	20	24	27	96	131
PF3D7_1012400	8112	9724	10835	29332	21014	14550
PF3D7_1207000	71	865	769	748	1263	2854
PF3D7_0412600	4	2	0	0	0	2
PF3D7_1104200	1238	927	996	811	1175	812
PF3D7_0211600	0	14	19	10	32	61
PF3D7_0219100	92	131	152	183	276	197
PF3D7_1464900	2445	1969	2025	1413	1894	1015
PF3D7_1004300	5225	5137	4014	2130	4757	2187
PF3D7_0417900	55	38	70	96	113	55
PF3D7_1477300	25	143	107	10	38	70
PF3D7_1303100	30	147	132	229	182	258
PF3D7_1204100	49	137	139	188	380	400
PF3D7_0719100	86	130	149	177	232	218
PF3D7_0731700	30	42	43	67	83	125
PF3D7_0305600	18	257	241	229	377	945
PF3D7_1314200	15	135	128	229	248	324
PF3D7_1252800	280	481	436	471	367	500
PF3D7_1202500	185	192	178	159	137	79
PF3D7_0618900	4	52	68	62	121	242
PF3D7_1466000	0	2	1	3	7	5
PF3D7_1120300	21	45	47	71	76	85
PF3D7_1414900	29	43	57	131	52	71
PF3D7_1422300	100	109	137	79	110	66
PF3D7_0621800	5123	5943	5184	5370	6702	3354
PF3D7_1320400	71	102	130	153	128	143
PF3D7_0931700	4	24	33	16	24	95
PF3D7_0512300	256	227	274	179	139	129
PF3D7_1444300	334	293	319	315	333	509
PF3D7_0310800	493	389	321	303	393	238
PF3D7_1426900	23	121	94	141	138	378
PF3D7_1470000	4	13	26	72	50	63
PF3D7_1324600	4	61	52	79	119	226
PF3D7_1405800	5547	5833	5113	3491	5419	2659
PF3D7_1327600	27	27	31	41	60	65
PF3D7_1218300	537	482	519	278	469	277
PF3D7_0717900	114	149	159	447	234	231
PF3D7_1138700	1495	1569	1626	760	1415	873
PF3D7_1318700	35	15	14	15	65	58
PF3D7_1032400	9	155	141	146	244	545
PF3D7_0629000	0	0	0	0	2	0
PF3D7_1408400	147	214	185	360	313	265
PF3D7_1038300	1	4	1	2	0	3
PF3D7_1035000	211	176	255	226	219	115
PF3D7_1029400	457	390	532	342	480	274
PF3D7_0807200	382	354	566	558	501	396
PF3D7_1234400	17	16	6	8	22	19
PF3D7_1143200	123	259	314	157	355	616
PF3D7_0720300	4	5	2	2	14	14
PF3D7_1236800	5	21	22	21	45	115
PF3D7_1138000	14	40	70	8	222	374
PF3D7_1475700	29	47	60	42	162	120
PF3D7_1445100	803	455	524	376	444	250
PF3D7_0101300	10	7	7	3	0	0
PF3D7_1243200	5	0	1	10	2	0
PF3D7_0206900	17	77	64	91	105	302
PF3D7_1472900	143	131	141	143	129	138
PF3D7_0935200	1982	1980	2034	1364	1834	1544
PF3D7_0833150	0	0	0	0	0	0
PF3D7_0304100	4	12	25	6	42	181
PF3D7_0524500	97	40	107	84	81	43
PF3D7_0819700	20	31	19	62	59	73
PF3D7_1315000	40	87	101	79	99	41
PF3D7_1363600	2	29	10	27	19	47
PF3D7_1337900	331	285	274	271	303	333
PF3D7_1021000	14	123	88	149	131	248
PF3D7_0703900	2221	2808	2759	2294	3283	1198
PF3D7_1448100	51	49	63	56	40	16
PF3D7_1457600	439	385	455	310	423	169
PF3D7_1336300	0	14	14	31	20	22
PF3D7_1307700	495	375	362	349	575	389
PF3D7_1240900	6909	7718	4813	395	111	382
PF3D7_1474300	28	91	61	124	77	141
PF3D7_1104500	2	4	4	2	17	9
PF3D7_0530500	20	8	17	15	22	20
PF3D7_1455400	221	130	222	247	280	96
PF3D7_0526100	6	4	23	54	16	25
PF3D7_0617200	13533	14385	14708	12855	16761	10885
PF3D7_1232000	23	43	63	89	96	83
PF3D7_0416200	377	460	529	380	358	496
PF3D7_1129800	98	122	175	209	163	100
PF3D7_1018800	72	112	71	91	264	97
PF3D7_0725600	162	147	270	109	173	166
PF3D7_0913800	15	39	52	10	166	467
PF3D7_0201400	0	0	0	0	0	0
PF3D7_1459600	1173	1376	1299	762	1254	761
PF3D7_1347700	1522	1660	1266	923	1666	901
PF3D7_1315900	1663	1641	1570	1348	2163	850
PF3D7_1359700	3	24	39	14	46	84
PF3D7_1131900	6	22	17	18	27	37
PF3D7_1016900	115	305	304	246	647	1229
PF3D7_1219800	1	2	2	4	11	6
PF3D7_0303200	105	487	459	451	945	2255
PF3D7_0402300	103	280	384	69	1443	2262
PF3D7_1329800	1	53	36	38	41	46
PF3D7_1135800	110	154	145	167	127	86
PF3D7_0203300	15	42	44	92	72	81
PF3D7_0510600	0	0	0	0	0	0
PF3D7_1225000	14	25	26	97	59	62
PF3D7_0202300	32	96	66	201	84	52
PF3D7_1002400	6876	8345	6913	4806	7396	4961
PF3D7_0416400	165	963	846	906	1391	2828
PF3D7_1205000	36	103	133	74	194	300
PF3D7_1478300	0	0	0	0	0	0
PF3D7_1208500	10	16	27	70	29	39
PF3D7_0913000	1977	1751	1452	1576	1612	1004
PF3D7_0309100	6	8	11	17	33	48
PF3D7_1362300	147	95	156	140	131	114
PF3D7_1003800	1717	1657	1790	1919	1651	1374
PF3D7_0902200	538	466	483	1058	662	465
PF3D7_0311000	0	0	0	0	6	0
PF3D7_0927100	5	19	19	24	35	50
PF3D7_0611300	13	125	70	136	91	278
PF3D7_1471500	8	10	26	29	54	154
PF3D7_1121500	2	17	20	30	36	68
PF3D7_0903300	30	357	489	205	1111	2167
PF3D7_0532800	3	2	6	38	30	13
PF3D7_0824900	1148	1149	1150	752	1107	546
PF3D7_0732700	2	0	2	0	0	0
PF3D7_0317800	721	950	1081	1069	1315	950
PF3D7_0202700	8	53	37	92	93	159
PF3D7_0112200	71	641	705	999	664	970
PF3D7_0717200	313	286	347	265	328	479
PF3D7_0705100	11	17	23	12	104	127
PF3D7_1479300	0	0	0	0	0	0
PF3D7_1249200	0	8	5	0	4	16
PF3D7_1111100	20	290	228	358	358	755
PF3D7_1339500	2	13	18	42	33	33
PF3D7_1479900	0	0	0	2	0	0
PF3D7_1424800	0	0	0	0	0	0
PF3D7_1217000	34	53	32	42	63	45
PF3D7_0115050	0	0	0	0	0	2
PF3D7_0215400	2094	1893	1702	1362	1989	1150
PF3D7_1365800	274	228	225	197	286	175
PF3D7_1018900	37	61	48	48	122	45
PF3D7_0911500	0	0	5	9	10	16
PF3D7_1411700	124	186	173	176	173	174
PF3D7_0925900	5552	5992	5435	6454	9159	3112
PF3D7_1201600	6	5	17	8	21	37
PF3D7_0622000	46	57	53	88	129	100
PF3D7_0501400	20735	24264	21404	4697	19230	7218
PF3D7_1007200	4	36	38	22	149	404
PF3D7_1407100	3535	3821	3608	2920	3513	1925
PF3D7_0912500	2003	2079	1770	1715	1837	1169
PF3D7_1017100	8	51	44	63	119	362
PF3D7_1355500	975	1066	957	1049	1116	589
PF3D7_0528500	433	381	479	321	501	333
PF3D7_1456000	10	160	250	222	360	963
PF3D7_1419900	268	288	260	141	222	116
PF3D7_1422200	12	5	11	7	23	47
PF3D7_0512900	5	1	20	18	26	6
PF3D7_1368700	58	134	148	327	360	356
PF3D7_0815900	3	39	13	28	107	108
PF3D7_0306400	20	156	185	145	329	718
PF3D7_1415600	363	267	479	443	417	415
PF3D7_1359300	949	947	932	931	943	634
PF3D7_0731200	482	527	360	96	216	125
PF3D7_0215100	265	210	211	376	312	449
PF3D7_1401100	12465	16837	10343	2503	10619	3195
PF3D7_1032200	8	6	14	9	17	18
PF3D7_0214000	2447	2682	2368	2640	2573	1575
PF3D7_0511900	57	50	79	72	109	39
PF3D7_1116500	22	68	94	111	141	210
PF3D7_1015800	17	266	201	311	393	819
PF3D7_0600800	0	0	0	0	0	2
PF3D7_1456300	103	78	172	228	174	92
PF3D7_1441100	10442	13472	10517	6873	10258	7339
PF3D7_0904800	63	370	318	724	480	779
PF3D7_0918700	760	1188	577	94	645	529
PF3D7_0208300	328	278	301	311	318	196
PF3D7_0303900	0	4	12	6	22	47
PF3D7_1216300	1117	1146	823	505	823	371
PF3D7_0936600	2059	1306	2441	2064	3059	1303
PF3D7_1463400	871	822	870	489	741	307
PF3D7_1215800	0	0	1	0	0	4
PF3D7_0913100	15	56	43	59	146	94
PF3D7_1424000	0	1	0	0	0	0
PF3D7_1006100	11	35	41	29	60	115
PF3D7_0906910	405	350	511	693	653	407
PF3D7_1306100	2	9	20	13	27	45
PF3D7_1302600	808	683	677	483	484	312
PF3D7_0709050	0	0	1	2	3	0
PF3D7_0900500	2	0	8	0	0	0
PF3D7_0400900	2	0	2	0	0	0
PF3D7_1422100	36	140	125	119	174	273
PF3D7_1411900	1262	1364	1340	1600	1903	675
PF3D7_1333900	8	50	40	69	74	140
PF3D7_1133100	2554	2521	2576	1741	2422	1377
PF3D7_0936200	292	215	473	1590	529	651
PF3D7_0919700	127	102	174	301	120	110
PF3D7_0405100	1265	1578	1412	1139	1495	1564
PF3D7_1000100	299	581	373	33	76	145
PF3D7_0109600	92	148	59	89	149	71
PF3D7_1150100	0	0	0	0	0	0
PF3D7_0315400	6	57	65	89	78	101
PF3D7_0311700	5	13	27	12	42	82
PF3D7_0629500	1116	1138	932	1024	1116	702
PF3D7_0502200	28	40	64	105	120	70
PF3D7_1242900	15	55	52	129	94	108
PF3D7_0631500	2	6	5	0	0	0
PF3D7_0414300	132	122	279	395	220	165
PF3D7_1119400	1113	1111	1071	939	1137	1007
PF3D7_0721000	1119	1616	2102	2438	2457	2832
PF3D7_0221800	4	2	15	2	0	2
PF3D7_0415100	211	314	254	108	160	142
PF3D7_1369400	31	71	120	98	108	94
PF3D7_1144500	169	169	163	217	181	106
PF3D7_1134400	24	77	53	119	52	182
PF3D7_0623400	2	11	12	6	5	18
PF3D7_0409700	22	38	38	117	75	118
PF3D7_1127900	240	288	265	324	348	375
PF3D7_0832300	0	0	0	0	0	0
PF3D7_1307200	455	576	572	529	594	538
PF3D7_1218800	6	12	8	19	13	28
PF3D7_0506300	34	168	116	190	181	255
PF3D7_1354600	324	211	410	308	253	135
PF3D7_1246500	38	66	87	103	74	42
PF3D7_0931500	63	111	197	200	255	255
PF3D7_1349700	126	79	156	71	198	169
PF3D7_1239700	183	607	656	960	865	2142
PF3D7_0711400	178	462	429	767	699	857
PF3D7_0423600	2886	2697	2782	2394	3064	1790
PF3D7_0423900	116	145	152	83	193	278
PF3D7_1244200	822	829	750	503	760	402
PF3D7_1434700	78	81	86	256	103	150
PF3D7_0303000	121	130	103	165	113	124
PF3D7_0824700	0	31	53	22	47	151
PF3D7_0526200	49	176	155	272	259	553
PF3D7_1204200	61	57	43	65	148	57
PF3D7_1115700	2025	2283	2043	5352	3166	2000
PF3D7_0829800	46	146	97	37	221	165
PF3D7_0220400	14	27	28	18	53	46
PF3D7_0607600	24	226	236	197	480	1275
PF3D7_0312400	63	581	506	686	896	2017
PF3D7_1436300	6367	4429	4054	3879	5127	3001
PF3D7_0803300	6	41	45	76	80	208
PF3D7_1312450	0	1	0	0	4	5
PF3D7_0721200	287	217	254	183	233	118
PF3D7_0626100	86	149	153	190	300	297
PF3D7_0415200	200	396	332	193	365	492
PF3D7_1241400	4	15	13	9	21	42
PF3D7_0723900	1830	1465	1853	1309	1603	1061
PF3D7_1203200	238	301	315	306	209	198
PF3D7_1458800	242	281	276	219	203	109
PF3D7_0223200	0	0	0	0	0	0
PF3D7_1342900	485	473	689	501	833	462
PF3D7_1030100	2463	2676	2185	1946	2287	2055
PF3D7_0709500	4	53	37	67	71	114
PF3D7_0817900	1080	1207	1181	1235	1780	2361
PF3D7_0714100	8	6	8	2	34	18
PF3D7_1434500	1701	2213	2615	2617	3041	1419
PF3D7_1314800	25	40	10	9	48	21
PF3D7_1137900	0	0	0	0	0	3
PF3D7_MIT03000	0	25	4	54	16	30
PF3D7_1029300	66	225	197	287	222	358
PF3D7_1143600	2	9	7	3	51	73
PF3D7_1032000	37	182	116	128	235	359
PF3D7_0935800	28	241	486	107	1271	2490
PF3D7_0521700	135	110	119	102	89	40
PF3D7_0321400	4	18	12	8	70	178
PF3D7_0213800	0	6	4	11	15	15
PF3D7_0521500	35	59	62	115	73	84
PF3D7_0532900	11	8	6	2	2	0
PF3D7_0321300	0	7	20	33	47	74
PF3D7_0317900	65	118	112	120	58	112
PF3D7_1239600	25	83	76	153	124	174
PF3D7_1362500	0	24	25	30	21	46
PF3D7_1419600	164	199	213	201	337	290
PF3D7_0400400	305	220	211	24	4	3
PF3D7_0815100	9	53	30	43	49	57
PF3D7_0528700	536	487	497	356	391	333
PF3D7_1448300	568	1019	949	1038	1200	1922
PF3D7_0925200	1770	2163	2297	1214	2030	1029
PF3D7_0524600	20	121	151	111	207	501
PF3D7_1355300	372	320	300	187	249	72
PF3D7_API00100	0	0	0	0	0	0
PF3D7_0724300	12	27	30	36	17	37
PF3D7_1341000	0	0	0	0	7	0
PF3D7_1353900	711	951	924	1003	1140	1138
PF3D7_0108700	1850	1575	1831	1333	1639	1475
PF3D7_1206900	29	46	48	36	114	85
PF3D7_1108100	18	8	14	16	62	94
PF3D7_1406800	23	143	175	89	591	1868
PF3D7_0213300	3	28	23	26	41	90
PF3D7_1305600	8	40	33	43	50	89
PF3D7_0301700	733	586	1279	2886	1168	1478
PF3D7_1403100	30	622	506	480	765	1824
PF3D7_0934000	47	79	126	197	129	184
PF3D7_0319600	3379	3415	3138	4175	3630	2212
PF3D7_1107200	330	453	529	742	624	649
PF3D7_0409100	2383	2173	1829	1373	2062	1341
PF3D7_0402600	0	2	0	2	0	0
PF3D7_1442500	32	78	91	274	149	189
PF3D7_1146900	37	58	65	55	65	90
PF3D7_1461900	2414	2829	2989	2859	3088	1729
PF3D7_1338200	8686	9308	9606	9159	12540	5742
PF3D7_0527600	125	231	219	269	422	354
PF3D7_0508500	274	472	483	318	784	1096
PF3D7_0309600	5373	6990	6604	7481	7469	5566
PF3D7_1213400	2	4	3	4	19	42
PF3D7_0531300	6	52	55	63	64	228
PF3D7_1105400	6445	8282	7295	9939	9673	6557
PF3D7_0210200	158	908	728	885	1466	1964
PF3D7_0917300	0	10	8	0	34	119
PF3D7_1349900	3	12	29	18	15	42
PF3D7_0112800	83	132	72	11	48	91
PF3D7_0700100	73	132	33	4	0	4
PF3D7_1111800	24	62	54	60	49	109
PF3D7_1460900	4	31	40	44	69	117
PF3D7_MIT02500	1	8	2	12	8	10
PF3D7_0817500	2639	3225	3648	3478	3938	4182
PF3D7_0216500	18	54	69	37	138	212
PF3D7_1311000	246	165	126	155	133	48
PF3D7_1116600	51	244	232	461	354	600
PF3D7_1220000	4	2	0	6	19	8
PF3D7_1215100	312	380	452	761	670	336
PF3D7_1201300	2	8	8	6	10	16
PF3D7_0822400	54	85	85	34	104	79
PF3D7_0902300	1965	1917	1901	417	1131	476
PF3D7_1326700	192	188	244	174	416	143
PF3D7_0409300	535	408	422	572	660	249
PF3D7_1147600	0	18	20	33	27	67
PF3D7_0906100	12	122	87	131	96	426
PF3D7_1408200	2281	2369	2043	1087	2502	795
PF3D7_0620200	3	1	1	2	6	8
PF3D7_1321200	51	71	72	96	48	100
PF3D7_1012700	165	257	238	150	243	243
PF3D7_0912400	452	664	514	485	728	823
PF3D7_0617700	0	0	2	0	0	0
PF3D7_0732300	0	0	0	0	0	0
PF3D7_1207500	14	65	64	66	72	169
PF3D7_0305500	1831	2187	2140	2170	2854	1920
PF3D7_1447200	2888	3009	2614	1558	2447	1678
PF3D7_0828900	20	49	91	36	202	327
PF3D7_1452200	4	13	17	25	14	26
PF3D7_1421400	427	423	446	563	417	301
PF3D7_1126000	4491	5060	4680	4439	5309	3141
PF3D7_1022900	2	47	28	70	47	143
PF3D7_1109500	1	4	2	3	2	2
PF3D7_1109200	20	26	34	33	59	69
PF3D7_0716200	2704	2464	2173	1200	2046	762
PF3D7_0211900	34	151	153	148	258	362
PF3D7_1442000	24	36	29	47	52	44
PF3D7_1017600	9286	10981	9290	6166	9330	6685
PF3D7_0723000	39	32	44	42	41	22
PF3D7_1359800	15	5	16	13	40	15
PF3D7_1227600	42	395	411	398	587	1419
PF3D7_0905400	155	597	1052	233	3955	12617
PF3D7_1352500	748	882	998	1148	1347	1744
PF3D7_1344100	305	298	343	309	364	226
PF3D7_0313100	532	869	1163	1835	1185	1687
PF3D7_0304900	158	266	151	113	322	158
PF3D7_1101200	0	2	0	0	0	0
PF3D7_1469000	48	40	98	157	87	98
PF3D7_0810000	240	162	236	382	288	166
PF3D7_1033600	3132	3189	3021	2137	3293	1671
PF3D7_0517300	7025	7379	6597	4153	5625	3084
PF3D7_MIT04200	9	56	19	76	43	79
PF3D7_0622900	4296	4052	3916	1587	4083	1779
PF3D7_0521000	1380	1643	1557	1619	1898	1403
PF3D7_1345600	21	31	39	9	174	332
PF3D7_1104400	813	670	798	825	841	713
PF3D7_1145800	432	377	366	404	347	166
PF3D7_1404600	15	36	41	54	101	196
PF3D7_1453600	20	79	113	192	129	110
PF3D7_0308400	1	4	4	1	11	15
PF3D7_1427300	27	160	177	169	344	407
PF3D7_1022100	669	585	567	264	392	128
PF3D7_0523200	75	108	163	181	183	134
PF3D7_1031100	1	10	12	35	8	11
PF3D7_0623800	11186	10848	10128	4698	12238	3657
PF3D7_0300300	1	0	0	0	2	0
PF3D7_1461200	427	371	278	216	237	102
PF3D7_1013600	21	325	323	403	381	811
PF3D7_0302500	175	455	627	155	1928	5158
PF3D7_1103200	0	0	0	0	0	2
PF3D7_1472100	975	886	941	537	869	458
PF3D7_0914400	13	28	31	7	85	201
PF3D7_1030600	452	459	479	497	344	270
PF3D7_0424600	3405	3920	3383	2262	4139	1941
PF3D7_1320000	1799	1485	1762	924	1704	620
PF3D7_1243600	3424	3669	3430	2442	3800	2902
PF3D7_1223200	323	306	307	259	275	242
PF3D7_0722800	11	18	14	13	28	11
PF3D7_0914500	305	625	523	402	1340	1094
PF3D7_0822300	368	283	325	366	270	138
PF3D7_0812300	6	7	4	12	15	18
PF3D7_0610300	0	1	0	1	0	1
PF3D7_1027700	15	201	186	125	233	491
PF3D7_1407800	4414	3516	3301	2817	3395	1672
PF3D7_1406600	39	259	189	300	453	836
PF3D7_0615400	6689	8378	8488	6210	9200	7513
PF3D7_1422400	1267	1290	1087	895	1273	504
PF3D7_1317100	69	943	856	914	1321	3127
PF3D7_0806500	1028	966	1014	920	923	904
PF3D7_1301500	10	22	16	4	0	0
PF3D7_0217700	381	374	381	472	689	325
PF3D7_1413800	395	374	429	349	300	123
PF3D7_1434100	229	116	218	262	174	87
PF3D7_0715900	19	406	275	424	403	1067
PF3D7_0416300	19	163	172	142	255	478
PF3D7_0711200	57	110	61	57	216	141
PF3D7_0201900	11063	5528	18098	1824	326	417
PF3D7_0919200	26	16	25	16	120	257
PF3D7_0219600	26	287	239	323	313	771
PF3D7_1318400	93	605	598	524	943	1744
PF3D7_0620800	0	4	3	2	1	0
PF3D7_0415500	844	728	683	527	503	374
PF3D7_1459500	6	18	30	37	29	17
PF3D7_0607500	19	67	69	113	115	189
PF3D7_1476900	12	25	18	21	18	31
PF3D7_1131600	4	35	47	40	38	81
PF3D7_0419200	60	70	83	62	57	136
PF3D7_1331300	9	100	73	94	132	322
PF3D7_1234100	5231	5933	5367	4362	6582	3760
PF3D7_0923300	134	145	84	126	264	128
PF3D7_0204800	7	102	82	92	95	114
PF3D7_1304100	0	50	52	71	70	155
PF3D7_0523000	5982	6576	5569	4940	6314	2955
PF3D7_1335100	107	220	287	68	614	1991
PF3D7_1203800	4	9	8	1	2	7
PF3D7_0829400	75	212	256	250	337	783
PF3D7_1232200	14	29	28	64	63	123
PF3D7_0414700	27	94	115	188	186	353
PF3D7_1424200	3	0	6	6	1	5
PF3D7_0212200	211	243	285	335	234	194
PF3D7_0323900	1754	1823	2077	278	0	0
PF3D7_0910700	4	6	7	25	18	24
PF3D7_1110900	1015	1024	989	799	875	643
PF3D7_0728900	548	744	649	686	899	694
PF3D7_1221500	15	80	51	114	62	164
PF3D7_0508900	93	448	724	172	1451	3457
PF3D7_1250600	954	971	909	508	837	523
PF3D7_1101100	20	61	18	8	6	1
PF3D7_0214800	1104	721	712	644	668	387
PF3D7_1432800	145	205	310	500	301	524
PF3D7_1416900	120	340	347	728	395	694
PF3D7_0605600	8	27	15	15	67	136
PF3D7_0508100	17	112	254	42	585	1351
PF3D7_0721300	2409	2303	2588	2094	2267	1315
PF3D7_0210100	5347	6729	6950	7428	8106	4900
PF3D7_1300200	34	98	44	4	0	0
PF3D7_1210100	51	63	93	176	135	235
PF3D7_0110700	87	503	328	664	421	694
PF3D7_0112000	80	176	183	215	263	251
PF3D7_1102500	708	1658	761	503	380	429
PF3D7_0828500	0	56	95	86	82	225
PF3D7_1015900	14444	17784	20324	29912	20032	15937
PF3D7_1202700	1398	1254	1088	827	1066	548
PF3D7_0112500	2	8	1	3	6	4
PF3D7_0701500	0	0	0	0	0	0
PF3D7_1140000	2	2	0	3	7	12
PF3D7_0323300	2	8	5	11	16	40
PF3D7_0937300	0	0	0	6	11	6
PF3D7_0401600	1270	1193	1309	2046	1312	1133
PF3D7_1243100	514	437	429	499	332	297
PF3D7_1232700	9	35	65	53	131	303
PF3D7_1476300	6	45	71	18	267	977
PF3D7_1366700	132	100	193	228	195	189
PF3D7_1464400	405	446	480	579	376	583
PF3D7_1123800	10	70	99	70	141	222
PF3D7_0902700	25	163	132	332	193	256
PF3D7_0309800	474	477	359	295	292	217
PF3D7_1212100	103	229	199	246	266	433
PF3D7_0812800	12	6	12	10	6	18
PF3D7_0710000	29	151	213	141	276	433
PF3D7_1465800	50	62	114	38	105	93
PF3D7_1406700	10	90	93	184	116	275
PF3D7_1352000	106	159	203	292	280	266
PF3D7_1112400	0	40	52	58	29	64
PF3D7_1360100	299	282	254	236	188	176
PF3D7_1113500	176	314	291	367	455	312
PF3D7_0209800	7804	9157	7871	8740	9475	6399
PF3D7_1472500	4	5	15	22	24	24
PF3D7_0906800	116	113	133	134	140	105
PF3D7_1331200	935	991	990	829	1064	545
PF3D7_0522900	18	68	31	4	121	106
PF3D7_0615300	7	58	76	65	94	146
PF3D7_1254700	7	6	0	0	3	0
PF3D7_1300300	706	842	382	40	3	1
PF3D7_0815700	0	5	9	5	1	8
PF3D7_1216100	0	9	5	27	10	18
PF3D7_1335700	19	162	158	292	232	341
PF3D7_1435000	6	97	74	82	101	288
PF3D7_0211800	3586	3129	3400	3774	3614	2709
PF3D7_1450200	93	37	94	81	134	19
PF3D7_0602900	239	293	259	91	182	272
PF3D7_0207600	163	1609	2612	473	5943	15195
PF3D7_1413900	542	337	358	479	434	306
PF3D7_0619000	792	1403	1741	2101	2147	2220
PF3D7_0514200	170	181	210	172	291	291
PF3D7_0507600	178	114	163	114	116	83
PF3D7_1120700	14	58	48	73	121	172
PF3D7_1147200	0	0	4	0	6	20
PF3D7_1410900	994	1226	1213	1132	1237	1270
PF3D7_1252700	378	653	545	581	601	922
PF3D7_1105800	910	906	822	1339	1039	1069
PF3D7_1020700	2205	2005	1856	1355	2132	644
PF3D7_0104200	81	155	160	269	434	437
PF3D7_1215900	220	167	149	162	113	127
PF3D7_1145300	44	57	74	82	72	58
PF3D7_1207700	6	12	10	6	7	42
PF3D7_0505700	520	724	656	597	479	673
PF3D7_0220900	0	0	2	0	0	0
PF3D7_0919300	23	32	55	11	207	1182
PF3D7_0510500	871	1037	1351	1669	1517	1829
PF3D7_1326000	17	89	82	96	185	309
PF3D7_1127800	842	956	1232	1411	1155	1041
PF3D7_1465600	40	56	59	40	145	80
PF3D7_0203400	14	174	179	168	203	825
PF3D7_0512000	361	439	538	683	633	512
PF3D7_0621000	40	69	131	179	162	99
PF3D7_1141500	3	4	0	4	16	9
PF3D7_0926100	8036	8585	8020	4467	9722	3321
PF3D7_1012900	1714	1744	1909	1790	2220	1316
PF3D7_0801500	1093	1034	953	930	753	459
PF3D7_0307400	2	77	87	115	96	199
PF3D7_0220200	3972	4223	4227	8063	5289	4241
PF3D7_1302050	249	296	225	40	130	22
PF3D7_0503600	74	99	98	45	371	702
PF3D7_0702000	1183	1968	1687	449	2317	781
PF3D7_0600100	0	0	0	0	0	0
PF3D7_0811400	5084	4763	5589	4890	5939	3204
PF3D7_1254100	0	6	0	0	0	0
PF3D7_0826900	56	221	218	220	802	757
PF3D7_0101100	12	8	11	0	0	0
PF3D7_1224500	19	80	114	170	208	345
PF3D7_0112100	5	6	7	8	11	8
PF3D7_0936900	11	13	20	7797	3360	2888
PF3D7_0920300	0	8	10	18	9	37
PF3D7_0929800	0	0	0	0	0	0
PF3D7_0217100	16	206	220	214	319	791
PF3D7_1007500	77	113	90	79	111	61
PF3D7_0412700	317	327	191	20	19	19
PF3D7_1230800	4042	3761	3447	2456	3610	1885
PF3D7_0320900	2237	2545	2585	1966	3313	3543
PF3D7_0631600	0	6	0	2	0	0
PF3D7_0416900	358	410	547	481	520	424
PF3D7_1011800	36382	40687	33577	28280	41790	23429
PF3D7_1140700	2093	2479	2312	2016	2130	1365
PF3D7_1118900	9	15	16	25	16	33
PF3D7_1019500	16	181	229	280	587	1424
PF3D7_0214900	64	201	274	85	881	3522
PF3D7_1033400	4769	4487	4200	6695	5340	3186
PF3D7_1210900	0	13	19	44	31	91
PF3D7_1477200	4	2	8	19	2	0
PF3D7_0626500	1	10	6	10	24	67
PF3D7_1032800	0	24	23	38	36	46
PF3D7_1013200	142	182	273	462	351	481
PF3D7_1438600	157	151	188	148	172	93
PF3D7_0910300	473	353	360	381	405	244
PF3D7_0109700	1464	1652	1226	760	1059	581
PF3D7_1353100	5298	3436	3255	2268	3290	848
PF3D7_1343600	8	38	41	87	46	55
PF3D7_1252600	747	998	547	212	467	223
PF3D7_1225600	3188	3446	2941	2385	3116	1740
PF3D7_0517700	5267	5447	4739	4390	5535	3112
PF3D7_1027900	108	110	115	94	326	157
PF3D7_1013000	143	59	155	167	210	102
PF3D7_0413200	2	0	0	0	0	0
PF3D7_0816500	2	0	0	0	7	3
PF3D7_1339600	21	53	49	102	116	99
PF3D7_0919600	0	7	37	49	27	15
PF3D7_0930300	461	2032	3084	678	10517	26071
PF3D7_0521300	572	614	634	498	804	345
PF3D7_1025900	85	224	320	114	804	1782
PF3D7_1339400	11	40	49	70	85	178
PF3D7_1214300	177	226	244	263	227	241
PF3D7_0305300	2669	3099	2746	1447	2550	1299
PF3D7_1453300	0	0	0	0	0	0
PF3D7_1409900	792	802	901	1115	972	995
PF3D7_1124100	1573	1327	1607	1323	1471	1021
PF3D7_0415600	10	32	42	132	30	61
PF3D7_1247600	2	0	0	0	0	6
PF3D7_0930700	184	130	229	213	190	101
PF3D7_1403700	3	35	24	38	38	124
PF3D7_0524100	1481	2148	1568	772	1621	1103
PF3D7_0315700	60	98	60	52	54	76
PF3D7_1338000	49	84	119	180	189	305
PF3D7_1009900	314	349	271	298	374	221
PF3D7_1357900	538	648	1163	2235	1109	1139
PF3D7_1110800	7	10	26	31	57	73
PF3D7_0303400	4	39	50	24	139	257
PF3D7_1422700	1131	943	853	1164	1206	705
PF3D7_0621600	1	4	4	11	3	7
PF3D7_1432100	170	124	152	151	128	103
PF3D7_1466700	423	365	395	319	316	180
PF3D7_0929400	36	280	490	155	1876	4503
PF3D7_0223400	21	64	53	6	1	4
PF3D7_1310500	176	136	161	141	141	128
PF3D7_0418200	2283	2474	2680	2080	2949	1521
PF3D7_0210600	9	18	25	11	126	330
PF3D7_0901900	19	6	44	34	42	21
PF3D7_1021800	68	623	739	435	1656	4105
PF3D7_1215500	0	2	4	2	3	5
PF3D7_1001300	2	4	10	24	22	27
PF3D7_1244500	10	11	6	8	34	35
PF3D7_API01900	0	0	0	0	0	0
PF3D7_1419000	108	445	360	351	650	1190
PF3D7_1429500	322	324	269	174	172	61
PF3D7_1348300	645	476	561	440	447	201
PF3D7_0425300	2	0	2	2	0	0
PF3D7_API04900	0	0	0	0	0	0
PF3D7_0932800	1113	1052	1138	1041	1336	973
PF3D7_0615100	8	14	12	5	24	39
PF3D7_0604700	12	129	138	198	208	505
PF3D7_1209400	39	146	125	154	276	679
PF3D7_0308300	2	4	10	10	36	117
PF3D7_1039800	1	0	0	0	0	0
PF3D7_1131400	2	96	63	91	72	128
PF3D7_1107700	1986	1817	1568	1296	1681	922
PF3D7_0824800	1753	1747	1790	1131	1744	908
PF3D7_0809700	4	0	2	6	29	53
PF3D7_1209700	27	82	105	147	81	162
PF3D7_0723800	22	220	186	199	471	1180
PF3D7_1021900	531	3461	2950	4384	4630	8217
PF3D7_1460500	47	257	278	338	414	688
PF3D7_1253400	2	13	13	27	36	74
PF3D7_0611400	517	484	605	409	457	349
PF3D7_1451600	2	6	12	10	28	23
PF3D7_1436000	4486	3739	5615	7272	5862	3772
PF3D7_0730500	46	334	405	485	667	1423
PF3D7_0530400	3	44	41	87	35	62
PF3D7_0923600	8	18	12	41	21	47
PF3D7_0403800	232	202	212	105	303	435
PF3D7_0306700	389	368	324	373	327	218
PF3D7_1449200	9	52	123	43	456	2266
PF3D7_1206200	9590	10240	8772	7644	10469	5976
PF3D7_0508000	16	78	86	21	240	569
PF3D7_1450100	1537	1549	1210	704	1471	594
PF3D7_0401800	132	145	306	891	267	842
PF3D7_1467300	44	141	110	114	139	288
PF3D7_0937800	597	614	535	459	428	693
PF3D7_0530750	15	25	44	36	38	48
PF3D7_0218700	1643	1585	1322	929	1341	752
PF3D7_1313500	6	9	13	2	58	120
PF3D7_1359600	139	1637	1231	3182	2289	4217
PF3D7_0706400	4106	5108	4879	5457	5764	3585
PF3D7_0830100	6	36	28	32	57	123
PF3D7_0801100	40	168	108	160	239	303
PF3D7_1349000	2	6	5	4	12	11
PF3D7_1334200	2862	3172	2910	2697	3277	1664
PF3D7_0811000	8	110	79	79	223	417
PF3D7_0804700	507	738	407	222	1021	495
PF3D7_1133300	2	18	47	12	74	175
PF3D7_0904700	2	16	25	32	40	116
PF3D7_0312000	2	31	29	55	25	81
PF3D7_0529400	191	655	644	705	1156	2070
PF3D7_1418900	2408	2227	1889	1301	1877	833
PF3D7_1148900	1482	1225	1043	633	888	304
PF3D7_1028300	1112	885	899	782	750	340
PF3D7_1240700	17	30	20	0	0	0
PF3D7_1310000	0	6	4	24	10	16
PF3D7_1341500	2	14	7	11	15	106
PF3D7_0300200	0	0	0	4	82	55
PF3D7_1323700	25	64	90	26	410	1136
PF3D7_1243900	20	86	89	72	439	1196
PF3D7_1327300	572	818	958	1124	2078	4877
PF3D7_1476200	603	475	674	2091	783	834
PF3D7_0730600	2	2	2	0	3	1
PF3D7_1229000	673	843	794	581	846	575
PF3D7_0826500	1159	1242	1061	889	1349	1112
PF3D7_0830000	0	0	0	0	0	4
PF3D7_0723500	72	36	64	63	78	49
PF3D7_1024700	15	138	92	111	160	289
PF3D7_1225300	1011	921	828	551	782	516
PF3D7_0532500	30	31	55	189	32	41
PF3D7_1201700	2	5	2	4	8	18
PF3D7_1142900	0	8	10	2	20	32
PF3D7_1111300	97	82	87	63	88	62
PF3D7_0210300	20	110	102	206	161	323
PF3D7_0627200	10	16	12	18	27	56
PF3D7_0729700	2	2	1	5	18	12
PF3D7_1213200	14	38	40	95	51	62
PF3D7_1023700	0	1	0	2	5	5
PF3D7_1402700	1303	1825	1765	1881	2114	1600
PF3D7_1012500	309	375	432	473	842	589
PF3D7_0421900	0	0	0	0	5	2
PF3D7_1235400	60	83	109	121	145	92
PF3D7_0104000	1	3	0	0	2	8
PF3D7_0731100	12546	14345	11437	5265	11750	4190
PF3D7_1141100	37	35	57	43	100	28
PF3D7_1470800	24	87	134	126	235	404
PF3D7_1219900	54	73	79	171	92	118
PF3D7_1428900	106	509	430	478	573	900
PF3D7_0816700	8	17	37	104	64	67
PF3D7_0909600	15	81	135	63	302	419
PF3D7_0632800	1869	1527	792	104	0	0
PF3D7_1307400	5	1	3	4	8	5
PF3D7_1213700	301	274	265	315	239	174
PF3D7_1020500	99	158	132	143	240	150
PF3D7_1438500	674	580	527	463	558	287
PF3D7_1205600	130	1261	1019	2274	1557	3036
PF3D7_1428500	164	332	237	85	194	106
PF3D7_1133600	105	142	133	70	338	152
PF3D7_1122700	2	5	16	19	54	50
PF3D7_0422300	359	704	528	367	1358	1591
PF3D7_0320500	396	182	546	993	579	577
PF3D7_1208100	745	776	858	776	995	410
PF3D7_0523300	19	39	48	57	109	206
PF3D7_1329200	4	29	40	17	77	95
PF3D7_1245900	180	78	143	120	66	44
PF3D7_0506800	1546	1353	1568	1223	1690	886
PF3D7_0527100	1015	1304	1118	1077	1389	1177
PF3D7_1008700	42	589	449	644	798	1813
PF3D7_1472400	96	141	192	219	254	165
PF3D7_0524700	139	212	286	413	203	240
PF3D7_0911000	1	21	46	26	98	102
PF3D7_1234500	308	270	264	237	257	143
PF3D7_1245600	19	26	16	10	73	47
PF3D7_0510300	2	10	4	6	25	34
PF3D7_1008800	5695	6650	6294	4692	6623	3456
PF3D7_1408900	242	182	190	224	161	111
PF3D7_1335500	0	4	0	10	9	9
PF3D7_1421100	309	603	362	114	418	122
PF3D7_0809200	653	588	601	450	668	304
PF3D7_1209500	4	16	24	17	59	112
PF3D7_0800900	100	120	76	5	25	4
PF3D7_1130500	11	174	121	126	186	328
PF3D7_1241100	794	849	745	556	728	439
PF3D7_1213600	15	90	74	212	109	243
PF3D7_1439800	981	914	1228	1512	1507	1350
PF3D7_0916700	2697	2086	1593	1095	2169	720
PF3D7_1115200	1191	866	893	654	1235	765
PF3D7_1016300	38585	51986	50167	48844	71783	56910
PF3D7_0628800	34	143	144	243	161	312
PF3D7_1460700	4620	5655	5489	6302	6882	4520
PF3D7_0825100	0	0	0	0	0	2
PF3D7_0407300	478	532	473	359	289	189
PF3D7_1451400	299	219	235	261	228	158
PF3D7_1329500	9551	8799	8489	3916	9301	3093
PF3D7_0901100	0	0	0	0	0	0
PF3D7_1423500	522	443	652	418	898	509
PF3D7_1317700	148	220	203	191	133	96
PF3D7_API05300	0	0	0	0	0	0
PF3D7_1327700	354	304	330	264	358	144
PF3D7_1308800	38	218	219	188	318	844
PF3D7_0708400	25552	36650	38288	51976	44040	45370
PF3D7_1365500	135	194	232	460	254	339
PF3D7_1427200	18	39	53	14	42	160
PF3D7_1350100	3213	3556	2969	3474	3303	2607
PF3D7_1325000	270	144	219	261	144	160
PF3D7_0704800	3	33	25	51	39	84
PF3D7_1451900	2081	2008	1792	1359	1890	832
PF3D7_1240300	705	846	649	63	6	31
PF3D7_0222300	2	7	9	0	2	2
PF3D7_1411100	72	77	125	72	179	147
PF3D7_1126300	39	54	46	73	97	79
PF3D7_1004700	13	27	26	45	56	53
PF3D7_0932000	19	77	51	44	138	468
PF3D7_0826200	2	9	9	8	35	41
PF3D7_1027200	337	553	418	378	531	355
PF3D7_1407500	197	241	289	288	223	133
PF3D7_0622700	52	38	37	63	121	51
PF3D7_0516500	14	28	22	45	89	175
PF3D7_1304000	8	128	89	145	231	554
PF3D7_0815400	2	45	44	47	44	125
PF3D7_0726400	573	898	1230	1012	1380	862
PF3D7_1335400	185	253	221	95	512	1138
PF3D7_0308500	187	368	371	726	401	554
PF3D7_1436900	116	163	150	96	239	114
PF3D7_0204500	469	480	490	626	744	367
PF3D7_0411200	81	150	154	425	179	259
PF3D7_1445700	3457	3438	2891	3134	3010	1970
PF3D7_1364100	22	132	183	121	427	679
PF3D7_0422900	4	14	7	26	26	50
PF3D7_1225500	807	914	745	601	723	389
PF3D7_0403000	0	1	0	1	0	0
PF3D7_0920600	11	97	75	79	143	304
PF3D7_0715600	15	224	160	291	206	679
PF3D7_0505800	1718	1785	1668	2568	2075	1944
PF3D7_1310200	0	4	8	6	24	67
PF3D7_1226400	245	304	394	503	512	346
PF3D7_1221700	49	90	118	151	126	142
PF3D7_1335200	0	0	4	0	5	14
PF3D7_0812500	8577	8276	6079	3342	6860	3128
PF3D7_1140900	9	33	43	111	63	109
PF3D7_1327900	0	0	0	0	0	0
PF3D7_0414200	2	23	17	19	19	110
PF3D7_0524400	2171	2662	2176	1438	2194	931
PF3D7_0915900	387	402	446	437	446	369
PF3D7_0612400	2	9	17	16	33	105
PF3D7_1351100	513	515	356	364	546	280
PF3D7_1351200	87	197	180	154	217	288
PF3D7_1337200	174	232	255	374	346	311
PF3D7_1116100	71	355	433	201	795	1849
PF3D7_0316100	9	35	44	29	83	153
PF3D7_1231600	1033	953	1310	1060	1650	1129
PF3D7_1328200	48	181	160	120	308	488
PF3D7_0514500	11	17	28	33	55	46
PF3D7_1327100	12	7	9	13	17	10
PF3D7_1037100	151	265	294	619	447	526
PF3D7_1018500	347	481	396	398	345	388
PF3D7_1422000	6	16	13	21	36	35
PF3D7_1468700	16480	18361	16029	17674	20637	11065
PF3D7_1128500	290	287	292	306	289	191
PF3D7_1303700	13	23	49	26	174	252
PF3D7_1224700	312	668	436	168	414	354
PF3D7_1119900	1813	2063	1637	669	1705	773
PF3D7_0608200	7	29	32	69	29	53
PF3D7_0726700	7	43	59	123	94	168
PF3D7_1144900	256	232	230	203	227	327
PF3D7_1404400	2	58	23	59	49	188
PF3D7_0620300	4	4	16	27	10	28
PF3D7_1441400	300	433	542	910	477	723
PF3D7_1105600	1860	1782	1451	1453	1826	859
PF3D7_1036500	38	104	109	47	302	879
PF3D7_1321800	1089	1122	1117	726	1068	506
PF3D7_0810700	64	50	103	132	94	86
PF3D7_1136800	403	251	383	255	384	235
PF3D7_1015700	0	35	40	61	59	102
PF3D7_0632500	26173	25951	13437	1589	0	0
PF3D7_1420400	3937	4016	3673	3304	4003	2476
PF3D7_1407600	93	232	235	207	366	313
PF3D7_0703100	70	63	36	46	46	12
PF3D7_0631300	14	33	12	0	0	0
PF3D7_1431300	1561	1717	1563	1069	1725	1038
PF3D7_0913150	0	0	0	4	5	2
PF3D7_1349600	18	132	138	221	272	461
PF3D7_1361800	93	263	453	68	1526	3521
PF3D7_0906400	54	61	70	30	128	71
PF3D7_0510200	404	496	519	436	500	537
PF3D7_0935390	4	70	142	168	226	596
PF3D7_1035100	8	39	66	8	137	315
PF3D7_0421700	0	3	0	2	2	10
PF3D7_1321500	7	133	157	107	328	822
PF3D7_0829700	0	0	2	6	6	5
PF3D7_0216000	4	50	60	43	195	406
PF3D7_0309700	486	744	601	382	823	735
PF3D7_1464500	143	364	546	645	756	1125
PF3D7_1355600	14	57	65	75	79	121
PF3D7_1102200	0	0	2	0	4	0
PF3D7_0907900	36	307	170	361	277	469
PF3D7_1237200	2001	2089	1775	1638	2012	1023
PF3D7_0415000	449	261	222	203	289	115
PF3D7_0106600	0	6	10	12	16	44
PF3D7_0806100	279	274	349	379	398	315
PF3D7_1246200	428	1760	1839	1664	4442	11685
PF3D7_1109100	12	22	33	14	51	34
PF3D7_0716700	6	50	47	60	66	72
PF3D7_0405500	235	183	177	302	183	137
PF3D7_0832800	0	0	0	0	0	0
PF3D7_1422600	4	32	40	47	86	163
PF3D7_1312900	4461	4113	4518	3688	5329	3415
PF3D7_0914700	921	673	617	452	671	256
PF3D7_1224900	317	248	245	170	189	184
PF3D7_1220300	0	73	69	51	174	331
PF3D7_1314000	17	41	56	80	58	98
PF3D7_0314900	7	30	40	48	102	193
PF3D7_0205400	411	415	412	346	255	209
PF3D7_1457200	259	711	775	1013	1073	1234
PF3D7_1010900	51	110	131	205	136	170
PF3D7_0422500	2534	2695	2826	2105	2399	1532
PF3D7_1336700	1175	985	978	758	761	625
PF3D7_1120800	0	42	45	66	38	84
PF3D7_0937400	0	2	0	2	8	2
PF3D7_0826700	7982	9888	9400	11858	12181	7465
PF3D7_1219400	2501	2093	1945	221	23	11
PF3D7_1249400	13	40	63	78	95	185
PF3D7_0528100	1901	1874	1572	1155	1816	1229
PF3D7_1411800	292	390	334	327	286	268
PF3D7_1023100	4	14	10	10	33	12
PF3D7_0906600	718	818	726	615	971	575
PF3D7_1212200	4	19	40	90	53	55
PF3D7_1142400	1033	1078	1038	739	889	529
PF3D7_1125500	692	602	608	661	618	300
PF3D7_0402100	841	933	1008	661	1891	913
PF3D7_0908700	41	34	70	128	95	109
PF3D7_1229700	0	16	47	42	37	86
PF3D7_0607200	6	47	54	69	90	199
PF3D7_0627400	52	79	29	95	64	51
PF3D7_1449300	1964	1937	1586	741	1260	676
PF3D7_0812200	3	20	9	29	28	39
PF3D7_0623200	420	455	508	398	651	417
PF3D7_0706300	95	76	77	25	136	145
PF3D7_1235300	20878	22465	18181	7908	20348	11349
PF3D7_0832200	3130	1435	3771	561	0	0
PF3D7_0111400	11	217	208	255	260	576
PF3D7_0804500	806	1613	2023	2648	3058	2969
PF3D7_1342500	11	18	15	16	70	122
PF3D7_1011600	27	33	48	52	71	33
PF3D7_0314100	225	331	317	234	343	358
PF3D7_1469800	25	183	144	381	313	592
PF3D7_1434900	2	0	4	4	3	22
PF3D7_1245700	1	1	0	2	2	1
PF3D7_0718000	13	38	21	38	48	83
PF3D7_0908200	12	42	64	39	99	236
PF3D7_1236100	3124	1548	2210	2699	3653	1171
PF3D7_0522100	31	91	121	74	205	270
PF3D7_0208500	4	38	46	58	67	139
PF3D7_0410700	46	225	315	189	583	1462
PF3D7_1423000	2137	2156	2006	1420	1893	1036
PF3D7_1221800	436	594	531	343	664	781
PF3D7_1437400	45	165	142	274	200	253
PF3D7_1363700	20	81	85	120	109	270
PF3D7_0409600	119	542	490	969	888	1264
PF3D7_0618300	4691	5121	4492	6477	6785	3756
PF3D7_1416800	35	129	83	276	122	251
PF3D7_0802300	1866	1763	1753	1490	1494	1047
PF3D7_1231300	2	0	2	2	17	40
PF3D7_0828600	6	17	26	14	96	212
PF3D7_0411700	0	0	0	0	0	0
PF3D7_0601900	1638	958	2043	2029	995	1104
PF3D7_1356400	12	82	84	63	89	235
PF3D7_1114700	1681	2071	2056	1911	2070	3152
PF3D7_0718300	2	0	6	4	8	12
PF3D7_0316600	4473	3886	5507	5863	6386	4138
PF3D7_1129000	746	743	899	1023	923	790
PF3D7_1140500	4	40	32	34	52	130
PF3D7_1330100	24	115	82	108	162	341
PF3D7_0812600	119	200	101	99	106	153
PF3D7_1478000	55	49	48	4	21	0
PF3D7_0630600	180	275	408	353	333	593
PF3D7_1401300	195	88	252	594	180	168
PF3D7_1365300	331	307	293	202	320	139
PF3D7_1446200	9253	8472	8441	9118	10114	4058
PF3D7_0503200	12	85	105	130	163	405
PF3D7_0811100	16	37	39	37	42	55
PF3D7_0115150	0	0	0	0	0	0
PF3D7_0914100	24	186	213	172	363	1068
PF3D7_0832400	2	2	0	0	0	0
PF3D7_0107300	0	10	8	6	24	14
PF3D7_0100300	0	0	0	0	2	2
PF3D7_0934500	1435	1154	1176	1383	1392	1148
PF3D7_1247200	115	112	129	141	91	94
PF3D7_1223500	679	1022	1308	1390	1601	1213
PF3D7_0801200	0	5	3	6	4	5
PF3D7_1125800	198	333	511	81	1148	2030
PF3D7_API00200	0	0	0	0	0	0
PF3D7_API05600	0	0	0	0	0	0
PF3D7_API05200	0	0	0	0	0	0
PF3D7_0105300	6	49	59	37	180	645
PF3D7_1415700	102	79	158	143	210	239
PF3D7_0111300	33	346	344	517	471	854
PF3D7_0101800	0	0	0	0	0	0
PF3D7_0617400	124	105	110	44	45	66
PF3D7_0215000	62	172	156	100	140	395
PF3D7_1457700	3067	2878	2740	1803	2852	1082
PF3D7_API04600	0	0	0	0	0	0
PF3D7_1365200	206	183	290	551	272	202
PF3D7_1250300	68	201	214	413	346	829
PF3D7_0514400	0	0	0	1	3	1
PF3D7_1207400	3	8	2	2	11	23
PF3D7_1000200	5	7	7	8	8	4
PF3D7_1237100	538	769	882	1427	1221	902
PF3D7_1041300	230	290	233	19	4	4
PF3D7_0912600	4	12	15	9	23	27
PF3D7_1312600	2	76	133	85	175	571
PF3D7_1408000	1089	989	909	1919	1436	796
PF3D7_0613700	186	213	332	454	405	536
PF3D7_1250200	911	850	766	593	1022	690
PF3D7_0823300	3083	2986	3099	3091	3303	2930
PF3D7_0817100	8	69	70	161	66	92
PF3D7_0804000	2039	2094	2025	1450	1994	1235
PF3D7_0211400	3	2	13	18	24	73
PF3D7_0626400	8	40	56	66	149	297
PF3D7_1370000	2	4	0	0	8	4
PF3D7_1239000	282	281	325	411	484	469
PF3D7_1337700	2	21	26	6	96	297
PF3D7_1018200	26	90	126	40	389	1055
PF3D7_0831200	960	1265	1211	746	1897	1370
PF3D7_0517900	50	66	109	36	172	401
PF3D7_0732000	0	0	0	0	2	0
PF3D7_0934400	42	138	105	136	188	361
PF3D7_0207300	0	0	0	2	6	7
PF3D7_0611800	1642	2066	1911	2470	2289	1988
PF3D7_0304600	39	59	73	100	99	168
PF3D7_1403400	7	43	57	53	113	346
PF3D7_0201500	343	309	725	982	457	738
PF3D7_1305800	0	0	2	0	0	0
PF3D7_1444500	1324	1225	1307	483	907	439
PF3D7_1303400	3770	3958	3374	2223	3454	2045
PF3D7_1138100	67	56	49	40	18	12
PF3D7_1012300	10	64	34	69	97	223
PF3D7_0821400	363	411	349	153	336	256
PF3D7_1457100	546	374	500	484	455	363
PF3D7_0205600	39	103	76	87	131	177
PF3D7_1447600	3	0	1	0	2	2
PF3D7_1435400	441	565	578	585	459	417
PF3D7_1340300	6275	6996	6087	3967	6627	3014
PF3D7_1244000	20	140	115	162	195	310
PF3D7_0516300	658	682	805	658	1139	524
PF3D7_0609300	15	54	41	47	46	116
PF3D7_0212600	33	43	51	54	172	528
PF3D7_1419700	7855	7674	6474	4798	7217	3452
PF3D7_1139400	18	31	28	13	37	21
PF3D7_0529000	1042	878	952	658	1026	489
PF3D7_0408100	449	679	491	192	484	409
PF3D7_0514300	62	180	218	387	311	418
PF3D7_1019200	0	0	2	2	8	8
PF3D7_1465100	12	49	62	50	84	128
PF3D7_1252400	112	167	266	62	832	1346
PF3D7_0322500	15	49	59	60	79	122
PF3D7_0714200	1330	1177	1045	637	967	663
PF3D7_0111800	377	569	969	1370	1214	1370
PF3D7_1430100	13	76	47	67	72	188
PF3D7_1330900	3	1	3	2	7	2
PF3D7_0212300	3241	3538	3202	3043	3572	2226
PF3D7_0605700	0	3	4	0	10	25
PF3D7_MIT03600	1	50	28	113	74	157
PF3D7_1478600	1620	1144	3106	2725	1261	1646
PF3D7_1462700	11	213	234	230	328	866
PF3D7_1402200	66	152	178	208	278	737
PF3D7_1341100	9	15	17	5	21	13
PF3D7_0529900	1406	1361	1152	914	1281	763
PF3D7_1410600	7611	9427	7668	5761	8669	5029
PF3D7_1105300	26	62	84	87	143	214
PF3D7_1436800	6	16	17	39	39	41
PF3D7_0311200	73	110	116	180	136	241
PF3D7_0401900	27	39	39	61	516	241
PF3D7_1208900	581	1203	1280	1702	2018	2730
PF3D7_1338700	14	163	153	241	341	553
PF3D7_API06600	0	0	0	0	0	0
PF3D7_0703600	39	127	157	76	291	897
PF3D7_1251100	635	575	440	269	454	360
PF3D7_0405900	6	66	101	27	386	1204
PF3D7_1416000	2	7	5	2	12	10
PF3D7_1358800	4492	4731	4664	6260	5810	3146
PF3D7_0912900	1452	1651	1595	1573	2008	1514
PF3D7_0722400	1662	2152	2111	2599	2195	2034
PF3D7_0114200	0	4	4	0	0	0
PF3D7_0708100	328	287	294	315	243	157
PF3D7_0701700	4	4	11	1	0	0
PF3D7_1366500	30	326	243	378	262	635
PF3D7_1311500	1137	1108	1157	1215	1288	1742
PF3D7_0305800	24	46	49	60	163	164
PF3D7_0102500	166	249	305	81	2615	5831
PF3D7_1450600	151	113	121	188	126	58
PF3D7_MIT02100	202	614	266	710	807	1426
PF3D7_0206600	62	24	78	73	43	32
PF3D7_1106200	8	43	29	68	52	63
PF3D7_1479600	0	0	0	0	0	0
PF3D7_0936700	18	36	17	45	371	110
PF3D7_0201700	3200	3808	3014	738	2407	709
PF3D7_0407100	231	237	254	225	199	189
PF3D7_1412600	376	381	477	513	397	316
PF3D7_1331700	564	577	609	507	601	463
PF3D7_0526000	15	39	47	90	94	109
PF3D7_1134200	1586	1417	1601	1194	1523	628
PF3D7_0205100	9	95	74	141	161	517
PF3D7_0601800	1	0	2	5	3	4
PF3D7_MIT02600	3	20	3	23	9	18
PF3D7_API03100	0	0	0	0	0	0
PF3D7_1305000	45	218	177	301	303	401
PF3D7_0420500	0	0	10	4	14	23
PF3D7_1202300	17	62	61	37	150	207
PF3D7_0803200	28	112	143	79	376	948
PF3D7_0811700	0	2	7	3	16	74
PF3D7_0724000	63	97	154	126	188	191
PF3D7_1137600	2	1	0	6	6	15
PF3D7_1111900	0	13	21	15	20	38
PF3D7_0907700	3168	2970	2456	2612	2679	1449
PF3D7_1321300	1224	1396	1443	922	1450	634
PF3D7_1130800	2	21	18	31	32	44
PF3D7_0609800	45	88	62	39	158	241
PF3D7_0100800	0	0	0	0	0	0
PF3D7_0624000	3980	3857	3705	5171	3854	3356
PF3D7_0523500	0	1	12	13	15	18
PF3D7_MIT02300	1	104	30	183	91	182
PF3D7_1476500	37	188	140	22	106	173
PF3D7_0209000	12	12	5	0	15	5
PF3D7_1127400	25	16	40	115	37	56
PF3D7_0931600	0	0	0	0	8	8
PF3D7_1331400	6	22	5	8	33	65
PF3D7_0628000	20	36	18	85	66	33
PF3D7_1443000	14	41	43	26	78	125
PF3D7_0932200	197	451	479	588	881	2277
PF3D7_1402600	9	3	10	3	6	5
PF3D7_1103700	800	688	718	816	594	486
PF3D7_1463000	30	13	28	24	33	13
PF3D7_0606800	82	144	204	123	264	397
PF3D7_1356700	90	89	105	172	114	87
PF3D7_1433000	396	366	421	342	378	215
PF3D7_0935900	87835	90314	73071	25017	82312	23507
PF3D7_0919100	1335	1409	1776	1215	1702	1802
PF3D7_1229400	1703	1874	2390	3068	2850	1378
PF3D7_0219300	84	126	119	162	149	160
PF3D7_0419800	1419	1213	1317	968	1488	532
PF3D7_0624200	19	154	171	238	254	635
PF3D7_0829200	98	177	160	472	267	327
PF3D7_1243700	329	344	423	452	747	1368
PF3D7_0930800	29	143	165	273	291	421
PF3D7_0202900	0	12	12	18	23	58
PF3D7_0729300	1662	1430	1490	1172	1400	633
PF3D7_1102300	265	238	425	312	359	340
PF3D7_1014400	275	245	324	321	283	140
PF3D7_0815800	553	644	1038	1593	1518	2491
PF3D7_0403600	5	36	30	43	88	205
PF3D7_0111200	0	11	2	20	11	13
PF3D7_0623700	35	98	101	170	198	261
PF3D7_0828200	129	444	458	1044	784	965
PF3D7_0309400	8	2	0	2	2	0
PF3D7_0728200	2	26	22	16	62	163
PF3D7_1319900	14	37	25	31	116	78
PF3D7_1146000	791	671	733	645	545	384
PF3D7_1467900	226	455	643	654	759	1468
PF3D7_1239200	53	719	582	641	857	1972
PF3D7_0500800	13151	43480	42630	7653	1869	6927
PF3D7_1102100	0	0	0	0	0	0
PF3D7_0525600	26	156	89	140	219	470
PF3D7_1304800	52	40	34	37	65	45
PF3D7_1122200	753	701	748	554	804	420
PF3D7_0101200	0	0	1	0	0	0
PF3D7_0629700	2459	3930	4067	3064	4958	3463
PF3D7_1318300	161	137	175	332	160	137
PF3D7_0106900	8	67	95	83	104	268
PF3D7_1148600	0	0	1	0	0	2
PF3D7_0310200	2856	4182	3708	4215	4858	2943
PF3D7_0304000	2	4	4	11	8	26
PF3D7_0421200	9	23	6	0	0	0
PF3D7_0731900	0	0	0	2	0	0
PF3D7_0902500	2223	2957	2333	582	2725	754
PF3D7_1316200	6	18	17	32	46	64
PF3D7_0919000	7522	8887	7411	5743	8005	5197
PF3D7_0412900	2	4	4	0	0	0
PF3D7_0818900	36168	52091	53478	75078	71569	78271
PF3D7_1226800	29	106	108	193	182	281
PF3D7_1221400	4	10	6	12	58	155
PF3D7_0630100	37	26	35	38	12	20
PF3D7_0214700	29	35	33	14	217	212
PF3D7_1316700	6	16	13	20	23	38
PF3D7_0618600	8	37	40	81	58	109
PF3D7_0104100	4	21	30	12	67	144
PF3D7_0700700	0	2	0	4	0	0
PF3D7_1215400	6	114	132	87	247	513
PF3D7_0706800	11	9	6	2	15	2
PF3D7_0710900	158	259	269	243	247	256
PF3D7_0221000	0	0	2	0	3	4
PF3D7_0831800	36137	38148	45141	4664	70	150
PF3D7_1032900	416	453	468	471	457	242
PF3D7_1415500	4	39	22	60	48	84
PF3D7_1016000	14	31	19	13	61	95
PF3D7_0607800	6	115	91	151	95	178
PF3D7_0404400	250	187	293	236	461	297
PF3D7_0625400	694	451	523	381	438	169
PF3D7_0324100	104	166	203	5	0	0
PF3D7_1466800	712	605	550	438	509	365
PF3D7_0822900	211	182	230	116	549	1545
PF3D7_1139300	3226	2050	3322	3881	4366	1712
PF3D7_0530000	122	225	198	165	222	330
PF3D7_1314100	105	109	118	223	148	96
PF3D7_1110500	88	269	373	574	473	809
PF3D7_0202400	15013	9571	19965	59642	30518	32813
PF3D7_0708500	1709	1686	1896	1905	1863	1729
PF3D7_1003300	264	182	325	498	327	203
PF3D7_1118000	53	95	150	177	137	257
PF3D7_API02800	0	0	0	0	0	0
PF3D7_0218300	67	192	124	242	203	272
PF3D7_1477000	60	14	52	19	15	11
PF3D7_1455300	37	25	57	48	178	344
PF3D7_1240100	277	338	280	60	74	43
PF3D7_0802800	11	63	65	36	269	693
PF3D7_0110500	299	376	456	686	553	666
PF3D7_1365900	4565	4945	4898	6407	5842	4451
PF3D7_0110200	60	97	108	147	112	133
PF3D7_0913900	28	47	81	127	100	62
PF3D7_0622800	4393	4068	3629	3632	4881	2322
PF3D7_1420900	15	44	48	54	81	143
PF3D7_1318600	0	7	13	18	20	60
PF3D7_0422600	18	29	17	18	11	14
PF3D7_0527400	574	512	513	412	529	177
PF3D7_0931100	7650	7524	6814	4830	7516	3524
PF3D7_0416600	2	42	21	34	72	96
PF3D7_1427700	6	25	13	8	22	48
PF3D7_0425600	102	133	96	876	411	443
PF3D7_1461000	0	18	17	20	16	29
PF3D7_1473900	1341	1034	940	480	947	327
PF3D7_0531800	0	0	0	0	1	1
PF3D7_1475100	120	111	185	300	176	152
PF3D7_0710600	8275	9687	8935	10472	11055	6670
PF3D7_0725300	1326	1093	1378	1172	1291	721
PF3D7_1000700	2	2	7	36	122	37
PF3D7_0517200	162	225	150	45	491	135
PF3D7_1436600	18	47	74	36	225	583
PF3D7_1475400	1	0	0	0	2	0
PF3D7_1245200	2	51	38	77	43	53
PF3D7_1208000	0	6	0	8	13	6
PF3D7_0313000	576	531	520	366	414	279
PF3D7_1112800	2	5	10	23	8	9
PF3D7_1231000	36	116	163	144	265	616
PF3D7_1337000	54	53	105	250	159	110
PF3D7_1138300	3	34	29	33	42	102
PF3D7_1019900	4	22	20	36	18	66
PF3D7_0512400	24	19	10	14	27	3
PF3D7_1134100	131	241	252	223	395	397
PF3D7_0107000	8	271	231	185	270	878
PF3D7_0302900	2352	2437	2370	1983	2904	1656
PF3D7_1004200	81	380	427	535	763	997
PF3D7_0602000	16	61	56	52	86	195
PF3D7_1121200	2	14	8	14	18	14
PF3D7_0315200	69	37	76	14	89	93
PF3D7_1100600	4	0	0	2	0	0
PF3D7_1124500	26	47	66	53	78	103
PF3D7_0813500	13	43	58	72	55	96
PF3D7_0937000	0	10	12	4	3	4
PF3D7_0914800	4	37	54	47	57	134
PF3D7_0830700	590	480	503	836	427	394
PF3D7_1359100	246	299	259	216	241	145
PF3D7_0619400	1217	1776	1721	2646	2072	2893
PF3D7_1471200	196	629	645	896	987	1556
[truncated: 3,721 more rows]

## Sheet: TPM Reads
Geneid	SLI-3D7MEEDvar0425800-HA_1 [tpm]	SLI-3D7MEEDvar0425800-HA_2 [tpm]	SLI-3D7MEEDvar0425800-HA_3 [tpm]	SLI-3D7var0425800-HA_1 [tpm]	SLI-3D7var0425800-HA_2 [tpm]	SLI-3D7var0425800-HA_3 [tpm]
PF3D7_1314600	10.6557	13.8338	21.3513	39.9764	15.8309	20.9873
PF3D7_0621350	24.8518	28.9716	30.8598	21.3663	34.973	12.8196
PF3D7_0209400	25.4699	46.4961	63.3417	91.2305	62.6647	69.013
PF3D7_1142200	0	1.77716	2.83948	2.94894	5.81306	7.86373
PF3D7_0507200	10.0179	9.78941	12.0738	10.8294	64.0419	44.3808
PF3D7_0806000	69.392	62.4846	70.934	76.3424	61.3327	61.0374
PF3D7_1006800	1275.2	1217.21	1109.29	1032	978.483	907.316
PF3D7_0412000	5.35921	25.9724	29.2337	42.8011	37.4102	118.321
PF3D7_0732200	0	0	0	0	0	0.539486
PF3D7_0324800	26.8263	48.2633	39.8778	7.48465	45.9483	37.2564
PF3D7_1227500	3.39646	28.2396	36.8839	24.4214	66.9219	179.369
PF3D7_0301800	230.952	423.597	261.085	45.9499	206.395	152.861
PF3D7_0920900	153.682	158.658	189.885	211.749	178.264	168.542
PF3D7_1443600	0	2.12062	3.38824	4.88729	2.22959	8.44512
PF3D7_0415900	1813.26	2143.05	2202.96	2105.11	2230.31	1615.63
PF3D7_0214100	703.819	747.871	613.208	315.838	640.54	384.164
PF3D7_0726100	1017.03	1096.38	783.638	297.872	689.498	241.655
PF3D7_0717700	1461.71	1230.84	1141.46	1049.64	1295.13	822.75
PF3D7_1342200	0.524825	4.74167	5.37655	22.3352	5.43204	12.0924
PF3D7_1400700	0	0	1.21585	0	0	2.69376
PF3D7_1322800	0	0.949777	3.54087	12.0828	6.2134	10.0863
PF3D7_1477400	5.02823	11.6189	26.0903	1.73693	8.21734	7.78131
PF3D7_1106700	77.7873	83.143	92.5495	99.9135	84.7001	97.9219
PF3D7_0621100	5.22549	7.91928	10.8146	8.31132	32.4509	89.4914
PF3D7_1040800	0	0	0	0	0	0
PF3D7_0909100	0.70426	1.23151	1.96766	0.851465	7.19332	25.2484
PF3D7_1342400	441.203	371.664	315.634	322.412	265.224	289.698
PF3D7_1028500	215.757	191.962	178.14	140.591	155.832	129.601
PF3D7_1419100	278.168	237.181	226.947	146.059	192.545	111.917
PF3D7_1448500	5.40213	41.6733	40.2041	54.516	58.7907	144.955
PF3D7_1125000	7.36769	28.2213	23.1989	31.2193	37.8418	108.226
PF3D7_1468000	1.65861	4.35053	4.08888	3.58594	3.10918	13.2867
PF3D7_0500900	2.60513	3.87217	5.58024	6.55127	16.8167	22.0388
PF3D7_1207600	76.5901	89.287	104.467	136.492	90.672	105.563
PF3D7_0311400	0.338706	1.06611	1.82956	0.327602	2.60158	9.99391
PF3D7_0722200	6.21742	25.006	29.6136	8.76266	117.284	502.523
PF3D7_API02500	0	0	0	0	0	0
PF3D7_0515900	6.20824	13.1416	14.3024	31.6038	16.2866	26.9682
PF3D7_0319500	405.243	358.935	383.421	349.101	294.207	333.013
PF3D7_1450000	87.0673	49.006	60.8154	38.9485	48.2449	58.3868
PF3D7_0300600	0	0	0	0	0	0
PF3D7_1443900	33.3488	56.3918	55.495	121.163	62.2462	102.692
PF3D7_1222800	0	2.24724	2.12773	3.03841	2.33355	10.312
PF3D7_1470100	42.1894	47.5049	42.0059	53.6254	38.6129	37.799
PF3D7_0519700	1473.15	1091.06	1131.38	595.64	1057.18	459.138
PF3D7_1469700	6.5268	34.5399	30.7125	68.1121	37.613	105.257
PF3D7_1455700	0.793932	9.94963	14.0486	16.7659	17.0834	50.6468
PF3D7_1132100	1.01809	0.741794	0.632112	1.31296	6.5166	2.976
PF3D7_0532200	22.5336	17.7316	37.2499	32.6923	83.3172	61.0247
PF3D7_0508700	255	233.567	203.463	205.495	234.976	218.819
PF3D7_1227400	103.965	91.2613	103.878	82.4432	71.5622	103.707
PF3D7_1126200	1415.25	1562.92	1556.41	1981.28	1616.91	1321.77
PF3D7_1242500	1.26604	18.818	17.0967	26.6337	23.2764	60.0831
PF3D7_0806700	79.6019	83.3477	84.8461	59.0798	72.9027	59.0622
PF3D7_0911100	13.1255	18.779	21.1142	5.1935	91.066	237.22
PF3D7_0303500	1.68907	16.7372	15.5059	19.4488	17.7451	40.1625
PF3D7_0422800	0	9.26251	15.1787	14.9757	19.3105	21.8589
PF3D7_0926300	4.6347	16.5468	13.6685	12.9502	24.1954	60.1677
PF3D7_1436400	0.650545	2.50269	3.02931	6.0405	2.65787	4.42963
PF3D7_1215600	0	43.6774	68.6228	44.6936	46.9422	203.574
PF3D7_0808700	14.187	24.2068	25.1439	2.99386	6.67444	7.62869
PF3D7_1444700	7.25904	26.5773	26.1968	30.7172	28.9161	67.4013
PF3D7_1209600	0	2.05602	0	2.27444	2.88222	16.9822
PF3D7_0523800	76.8257	62.0429	55.3755	21.5802	43.4168	23.6118
PF3D7_1459700	2.85487	34.1135	13.8848	32.5217	34.214	51.0523
PF3D7_1409000	47.6637	48.098	53.6891	60.8608	39.8707	34.2079
PF3D7_1028900	1.28368	1.68355	2.98879	0.931201	4.98239	22.183
PF3D7_1447100	441.739	355.328	448.424	314.746	273.523	277.998
PF3D7_1366000	52.7541	38.3956	45.4127	56.8166	58.951	29.125
PF3D7_1026000	738.836	567.678	1063.01	1190.62	762.159	969.422
PF3D7_0919800	65.8101	104.651	116.83	45.8733	123.258	227.427
PF3D7_0205000	2.53627	17.2475	13.1226	19.625	14.2768	78.208
PF3D7_1354200	19.7367	22.1668	25.5541	42.5248	23.863	44.5315
PF3D7_1353200	1167.6	1195.18	1035.46	503.58	1115.47	351.914
PF3D7_0700300	0	0.529318	0	1.75665	0.989365	1.24916
PF3D7_0610800	1135.57	1221.87	1083.09	995.748	1128.76	768.583
PF3D7_0914300	125.844	121.285	127.743	106.477	116.613	80.3719
PF3D7_1005200	1.15377	2.01756	0	0	2.82831	16.6646
PF3D7_0605000	6.37931	18.1273	20.794	44.2196	36.4886	51.5545
PF3D7_0410900	50.2447	39.1216	59.115	49.7477	86.2418	60.2715
PF3D7_1113700	120.232	105.758	86.9404	127.533	72.1247	68.2039
PF3D7_1108800	0	2.1512	0	0	2.01044	1.26917
PF3D7_1129400	332.303	280.192	324.885	383.056	287.832	230.228
PF3D7_1215000	1.19778	11.5198	10.0396	11.9713	25.447	51.4887
PF3D7_0607000	2509.92	2046.28	1956.02	1554.36	1817.5	1452.85
PF3D7_0519600	128.118	112.716	127.055	104.604	89.0239	88.9972
PF3D7_1460600	7.54385	5.6964	11.816	13.9297	24.0965	21.5797
PF3D7_1321700	861.645	763.829	702.141	566.781	560.46	606.448
PF3D7_0820000	212.521	194.693	205.087	174.424	171.519	140.058
PF3D7_0623900	14.3511	44.6548	40.4893	79.6095	133.476	145.01
PF3D7_0311900	0	4.71552	4.39499	9.99823	6.24319	12.7512
PF3D7_1372900	0	0	0	0	0	0
PF3D7_0905600	0.628701	1.09939	2.63483	1.67225	1.41274	2.59448
PF3D7_1437700	1.68146	11.0262	11.9014	5.69218	16.2127	36.0825
PF3D7_1307100	116.054	88.6058	108.211	75.0103	73.2574	56.4608
PF3D7_1110300	192.074	213.504	212.151	163.531	194.335	164.586
PF3D7_0532400	470.349	272.569	618.578	756.284	315.933	485.251
PF3D7_0527500	1941.95	1922.29	1611.9	1754.83	1523.68	1502.15
PF3D7_0620600	2.48008	4.02705	3.62958	3.08414	8.10609	6.21388
PF3D7_1413400	2.55088	32.5626	27.7953	22.9454	37.7271	112.373
PF3D7_1214700	9.14521	8.35941	12.7756	11.6598	4.41571	8.14838
PF3D7_1327000	22.2309	28.2153	30.9447	37.5709	25.6854	27.1277
PF3D7_0716300	64.0788	296.871	306.575	531.538	456.555	1126.88
PF3D7_1426600	1.37915	5.80994	5.48799	5.33575	9.63015	30.2678
PF3D7_0210400	5.96895	37.9553	20.7198	97.6208	35.9151	79.4951
PF3D7_0920800	753.313	591.274	635.418	574.737	567.518	335.557
PF3D7_1250000	442.337	360.915	328.593	320.666	262.028	275.245
PF3D7_1418500	0	0	0	0	7.9066	4.99138
PF3D7_1009200	49.6877	44.4814	50.5391	46.9106	31.5938	29.5675
PF3D7_0921900	1371.24	1261.51	1171.92	897.286	1078.84	839.945
PF3D7_1463300	0.819354	16.9545	10.1744	16.3782	9.37315	32.9672
PF3D7_0318400	8.75269	8.50307	15.0954	20.3805	27.2836	47.8256
PF3D7_1321100	1.31561	3.1854	4.57113	1.7619	19.0608	51.6817
PF3D7_1361300	0	1.12782	2.80308	1.24763	3.16205	4.87954
PF3D7_1252900	75.9517	89.3626	100.135	18.1387	55.6767	16.1231
PF3D7_1244800	495.756	518.564	484.711	541.955	453.056	449.391
PF3D7_1020100	0	1.02209	1.08871	0	4.29846	7.23623
PF3D7_0622600	2.67368	32.7276	63.911	56.0306	44.4226	171.02
PF3D7_0525000	4.43725	6.46605	8.49453	27.1813	11.7837	35.2239
PF3D7_0732500	1.02901	0	0.958335	0	0	0
PF3D7_1335300	3.80335	3.18684	4.28006	2.19698	7.33786	21.3632
PF3D7_0207000	11.081	66.5559	73.3614	49.162	116.725	476.173
PF3D7_0412300	0.243028	1.27492	4.52671	2.82073	3.57449	4.5131
PF3D7_1433400	41.7725	91.5116	98.5475	148.465	143.369	184.77
PF3D7_1473600	1.87027	13.8995	8.12847	29.2449	11.2071	19.2953
PF3D7_1006900	50.8664	46.4508	61.76	61.2252	41.564	79.6889
PF3D7_1014800	0.459667	4.42092	4.0669	1.55609	3.75603	24.1858
PF3D7_1471900	45.1687	43.1028	48.031	41.7318	57.1528	30.429
PF3D7_1026600	96.2881	159.302	170.614	27.7947	579.207	1005.33
PF3D7_0107600	0.706792	1.85391	0.846317	1.17192	5.1153	5.1043
PF3D7_0922100	1284.69	1169.06	944.888	565.443	1028.47	528.906
PF3D7_1471000	103.003	68.7291	69.6742	98.8397	63.5674	41.6676
PF3D7_1429200	0.960956	4.93614	4.81037	3.25308	8.83369	9.91402
PF3D7_0800100	26.692	26.1857	12.7243	1.66279	0.221802	0
PF3D7_1416400	12.1179	29.1952	22.5711	8.33464	63.5912	37.2275
PF3D7_0516200	1156.65	1119.44	1278.05	1248.68	1265.51	886.648
PF3D7_1029600	799.856	1022.2	1028.24	1276.75	941.038	1080.58
PF3D7_0517100	6.18489	10.5802	9.51666	21.0675	22.1928	14.1488
PF3D7_1125200	50.9799	55.8653	71.112	110.232	77.2037	75.0356
PF3D7_1114800	0.726019	6.03042	6.76152	0.702217	8.89867	32.9569
PF3D7_0520800	18.9507	31.1589	31.003	51.6631	40.1514	55.7986
PF3D7_0805600	157.889	131.512	146.174	124.926	105.349	107.469
PF3D7_1320900	77.0445	99.2066	120.023	126.682	139.645	123.564
PF3D7_1242600	72.298	57.5233	77.2076	83.6802	39.9748	46.7422
PF3D7_0313500	41.6129	34.0807	46.1132	54.3442	32.1376	39.6707
PF3D7_1310700	39.4756	54.932	64.9847	11.8309	251.463	854.966
PF3D7_1209900	0.886561	14.7278	11.2291	20.9229	11.1562	34.3908
PF3D7_1302400	12.8721	20.4627	16.3472	4.5273	61.1958	44.6688
PF3D7_1300100	11.1793	29.5559	14.9561	0.686526	0.0724985	0
PF3D7_1448000	252.742	210.227	208.759	164.935	200.002	89.0503
PF3D7_0614200	21.5171	19.5164	26.4068	20.6172	15.9389	14.5226
PF3D7_MIT01700	17.4464	381.35	129.985	776.227	377.78	1151.95
PF3D7_1221900	617.212	504.832	498.153	261.702	435.611	167.092
PF3D7_0322900	2758.22	2943.76	3087.9	3541.32	3408.98	2440.3
PF3D7_0934100	70.4264	70.7575	75.3689	74.2116	73.1063	90.7139
PF3D7_0918100	564.979	773.749	521.573	345.752	574.458	403.878
PF3D7_1018100	0	4.74329	3.15777	5.24719	7.20348	6.29654
PF3D7_1019400	942.288	959.053	1054.33	1633.48	1200.34	969.287
PF3D7_1211200	92.8569	77.1023	78.7941	53.1761	63.446	53.5407
PF3D7_0518300	114.662	159.919	177.762	310.929	187.668	317
PF3D7_1023200	116.63	107.278	137.814	135.628	104.39	70.2475
PF3D7_1222300	314.74	443.687	533.483	836.926	658.515	1038.75
PF3D7_0518400	6.67516	3.64769	6.99377	8.87745	14.3178	23.2424
PF3D7_1009400	104.118	69.7727	64.113	74.8661	42.2587	50.1751
PF3D7_0630000	0	0	1.2721	0	0.558058	0
PF3D7_1320100	1.89075	16.8069	22.598	15.8493	27.5519	55.9187
PF3D7_1100700	1.33271	2.91309	2.48236	5.80061	1.08899	0
PF3D7_1302200	1.07614	1.8818	3.50778	1.04086	3.51733	2.22046
PF3D7_1221300	19.2632	41.0748	42.8365	28.708	41.2782	149.051
PF3D7_0616800	19.337	20.416	36.0177	71.8128	32.4957	67.0008
PF3D7_1429700	113.793	128.805	157.014	219.501	130.913	188.901
PF3D7_1441700	0.685396	3.59558	2.55328	8.61804	3.08028	11.6673
PF3D7_0415300	444.12	426.46	426.979	330.02	384.523	314.036
PF3D7_0806800	674.445	559.831	532.586	450.544	574.756	463.922
PF3D7_1119300	456.573	489.346	437.288	240.061	262.338	288.229
PF3D7_0222900	0	0.742451	0.395419	0	0	0
PF3D7_0105800	2.38618	33.497	27.0378	34.6193	50.0448	130.475
PF3D7_0526600	7.09635	7.85719	4.26184	4.00917	9.94428	10.2976
PF3D7_1423800	141.24	135.888	132.256	89.0888	149.09	100.697
PF3D7_0822100	56.3821	37.4933	75.806	65.6709	44.1243	34.4095
PF3D7_0924100	45.6999	23.526	33.0146	44.2017	25.1275	35.9116
PF3D7_0918400	1.22662	5.65488	6.23113	4.31422	4.55591	16.9115
PF3D7_1441000	89.8777	94.525	93.6529	78.7368	103.088	60.6134
PF3D7_1015100	96.2801	66.6634	62.7152	43.6013	50.0229	78.6606
PF3D7_0322400	207.454	228.106	283.706	271.433	284.797	193.836
PF3D7_0507500	10.827	15.9435	14.329	4.04186	54.0132	112.093
PF3D7_0521100	0	0.769193	0.93637	0.972466	1.02694	1.55592
PF3D7_1254400	0.505029	0	0	0	0	0
PF3D7_1107400	24.9544	58.7019	65.2944	42.2385	117.975	97.1567
PF3D7_0810800	131.981	89.576	126.844	243.455	126.228	117.303
PF3D7_0830900	91.1659	51.6955	185.19	300.314	87.7188	146.193
PF3D7_1438000	765.558	702.442	685.222	462.751	649.05	363.701
PF3D7_0937200	4.40266	5.92214	3.46946	0.655127	3.5975	3.49396
PF3D7_0832100	0	0	1.0452	0	0	0
PF3D7_1471800	1.44899	5.9122	2.69894	6.07312	5.92	15.9456
PF3D7_1454200	36.9275	18.24	23.7835	24.1205	18.1241	9.15328
PF3D7_1348600	1.38065	0	2.57165	1.00154	11.5636	28.844
PF3D7_1203700	2425.74	2525.98	1874.36	1718.13	2039.46	1683.78
PF3D7_1247300	52.3217	59.8094	59.7369	45.9207	57.7959	39.385
PF3D7_1113100	227.384	214.481	221.782	184.86	237.439	165.374
PF3D7_0928800	2.89236	25.2889	23.1091	38.4294	19.6536	74.443
PF3D7_0601300	14.2407	5.92911	14.5257	3.27949	0.554114	0
PF3D7_1033200	246.292	167.86	294.851	539.204	284.291	412.178
PF3D7_0702500	852.903	390.332	724.26	773.098	389.763	354.832
PF3D7_1362200	171.481	119.337	127.924	157.451	122.361	108.974
PF3D7_MIT00500	0	976.255	146.233	1501.83	513.21	1529.93
PF3D7_1113300	4.02409	30.6603	28.6431	40.3118	32.8817	111.203
PF3D7_1138500	558.711	458.296	433.924	267.131	362.855	302.152
PF3D7_1421900	3.1926	18.6093	35.6798	36.0259	57.8271	160.296
PF3D7_1421200	2131.66	2364.47	2213.87	2964.81	2504.36	2108.58
PF3D7_1443800	98.7752	73.7452	78.3197	86.6331	66.48	96.2576
PF3D7_0100200	0	0	0	0	2.83399	0.596359
PF3D7_0406000	123.538	73.1636	100.725	117.459	77.5183	144.285
PF3D7_1408300	0	4.44487	3.55092	0	21.8086	15.7344
PF3D7_0816300	5.94924	13.4235	18.2304	8.72411	18.1905	16.6313
PF3D7_1352200	348.393	253.146	268.675	180.053	233.862	130.039
PF3D7_1122100	0.564444	2.96107	4.73108	3.00267	8.53254	8.15258
PF3D7_1320200	3.64388	13.6541	13.0896	15.6081	27.4354	32.4913
PF3D7_0508200	1.70084	5.20483	9.70208	7.40284	26.9271	60.5379
PF3D7_1121600	1363.73	1352.15	1459.34	2723.79	1744.86	2371.05
PF3D7_1231400	4.11813	5.79229	6.75343	5.28197	21.2873	30.6639
PF3D7_1216500	5.85909	13.7507	18.3803	8.94791	67.2781	223.655
PF3D7_0532100	3197.54	3503.56	4026.56	6186.73	4248.54	4581.72
PF3D7_1412500	311.64	204.019	261.837	327.417	211.995	197.547
PF3D7_1322000	1.62469	24.0198	22.8341	26.7143	42.8443	104.075
PF3D7_1002900	127.668	138.099	163.867	83.1132	127.725	93.7187
PF3D7_1001200	31.724	83.2121	83.5287	386.77	140.493	189.506
PF3D7_1308100	7.22073	26.095	22.8642	41.4384	22.8141	73.5018
PF3D7_0806300	1.50856	3.01483	7.42616	1.45911	19.1946	54.0279
PF3D7_1249300	89.7959	99.4046	96.76	124.32	98.6002	131.229
PF3D7_1027000	2.72369	4.02377	3.23638	5.45049	7.90467	9.98031
PF3D7_0816000	374.475	355.14	320.444	227.61	244.75	145.722
PF3D7_0318700	8.63329	13.2096	26.131	3.13135	47.1766	106.325
PF3D7_0910600	21.1764	20.4439	27.5285	46.9382	21.6296	58.7146
PF3D7_0104500	273.762	375.616	370.379	482.163	464.397	345.411
PF3D7_1249600	0.761551	5.99264	7.44707	4.7878	13.0679	38.8911
PF3D7_0727800	22.2222	43.3668	63.4122	81.676	71.4707	98.2161
PF3D7_0504700	13.2015	32.319	30.9418	23.8349	45.6659	82.3997
PF3D7_0402200	15.9061	27.5877	36.39	3.51172	107.298	299.484
PF3D7_0305200	151.575	137.469	163.403	167.136	145.723	168.041
PF3D7_0607100	10.1433	2.83795	3.77864	6.27888	7.29369	7.11596
PF3D7_1338100	184.98	243.828	289.994	328.625	315.112	504.256
PF3D7_0502800	49.847	33.7767	64.9926	83.7698	65.6787	22.499
PF3D7_0705900	32.9888	92.3668	112.285	169.413	116.808	260.927
PF3D7_1407200	109.55	59.3439	82.6185	92.4258	47.1902	90.9081
PF3D7_0524900	182.268	152.356	148.119	129.92	111.424	83.0919
PF3D7_1216400	184.713	144.05	122.683	71.2526	139.22	100.15
PF3D7_1132400	28.2623	45.754	67.1515	98.8146	73.0349	96.0249
PF3D7_0308700	0.51589	5.18718	4.08387	4.49079	7.79856	48.9656
PF3D7_1241200	76.3851	72.6886	85.7619	74.1744	74.1924	73.7185
PF3D7_0611100	0	11.2774	16.3805	12.4754	13.4139	78.632
PF3D7_1332000	87.8479	61.5467	71.6873	71.683	72.9514	83.546
PF3D7_1124400	151.215	102.952	161.607	166.038	109.382	66.4944
PF3D7_0531200	0	1.51052	4.8269	10.026	6.70549	20.4972
PF3D7_0928000	134.97	118.009	111.559	102.397	165.775	187.113
PF3D7_0804300	120.515	105.527	93.4472	58.1948	56.671	27.6915
PF3D7_0617300	9.52087	15.6695	23.9929	15.1673	35.2375	117.87
PF3D7_0526800	481.926	373.78	398.585	398.943	339.374	254.384
PF3D7_1445600	399.245	480.611	403.395	283.566	527.866	344.196
PF3D7_0424700	1116.65	809.123	1041.7	516.656	831.683	477.663
PF3D7_1131000	8.52937	52.5754	36.5403	88.2723	32.7568	97.2357
PF3D7_0632700	51.9228	86.79	65.4236	4.43123	0.415953	0
PF3D7_1461800	4.09467	6.26519	4.66644	2.24077	18.138	21.3999
PF3D7_1208800	174.742	142.788	139.926	58.8085	125.746	63.6354
PF3D7_1442200	4.99416	15.6923	13.0813	17.0575	16.8334	36.5497
PF3D7_1349400	106.729	103.831	108.918	113.989	106.617	101.425
PF3D7_1039900	0	0	1.15683	0	0	0
PF3D7_1018600	249.593	272.464	249.346	201.862	302.986	167.732
PF3D7_0111700	0.95399	0	1.3327	0	0.389762	0.984215
PF3D7_API06700	0	0	0	0	0	0
PF3D7_0727900	39.9423	29.846	32.2828	18.9761	22.1419	6.80746
PF3D7_1002700	15.4202	23.3617	41.7214	21.2149	27.6987	50.3321
PF3D7_1124600	8.43412	44.3663	50.992	59.778	68.3521	150.918
PF3D7_0701900	52.4384	109.798	80.422	14.7547	96.4925	82.9062
PF3D7_1424700	13.7079	5.99264	0	26.5171	5.60051	0
PF3D7_0903700	2.9046	41.3589	34.973	53.1774	52.3845	169.737
PF3D7_0417600	0	2.75287	5.23622	2.61027	8.63704	44.548
PF3D7_1418100	0.106676	0.512989	1.29154	0.515896	1.3511	1.48576
PF3D7_0628100	0.375945	1.01741	1.71727	0.502142	6.88988	14.7385
PF3D7_1309300	566.606	461.821	468.191	402.931	447.604	304.833
PF3D7_0900700	2.51192	7.46727	4.67878	0.971829	0	0
PF3D7_0710400	17.4249	17.1007	27.1572	48.4972	23.5367	34.8533
PF3D7_1474400	1.54663	2.70454	4.56126	2.80486	8.26724	26.4609
PF3D7_1451200	762.318	674.657	557.347	370.648	499.546	375.543
PF3D7_1455200	1.72117	19.2624	14.9075	28.1342	12.0951	42.6169
PF3D7_1139500	0	1.55846	1.66003	3.73537	1.45648	3.06488
PF3D7_0703300	27.2186	41.9054	40.2279	138.499	47.3827	84.8534
PF3D7_1411500	173.351	151	154.963	111.152	128.952	71.9715
PF3D7_1232500	4.53929	9.12834	14.0917	6.87841	42.9024	113.175
PF3D7_0214600	14.9094	13.8071	19.4724	4.52245	62.7882	232.001
PF3D7_1217400	66.7494	84.7914	54.5906	34.7294	243.873	186.329
PF3D7_1213500	0.274551	1.68034	1.53416	7.9665	5.15984	18.6945
PF3D7_1229900	4.06119	16.292	22.9159	24.4925	40.6025	57.9186
PF3D7_0913400	19.3046	28.793	48.6483	30.7535	112.275	64.435
PF3D7_0527800	0	0	0	6.70913	0	0
PF3D7_0107900	23.7359	36.1972	46.7816	108.916	41.0454	41.5725
PF3D7_1439200	9.3844	9.98285	14.7121	11.0434	11.5023	15.0067
PF3D7_0934300	1.79077	8.61151	6.67109	8.66031	11.3404	34.6408
PF3D7_1470950	10.4299	18.2385	11.6563	16.1408	40.9081	19.3687
PF3D7_0203200	75.3901	52.2693	80.634	39.0228	52.6992	27.6479
PF3D7_1109700	56.7224	34.716	34.3372	19.202	20.8571	38.0377
PF3D7_0616100	38.0495	49.0838	63.9011	60.3313	74.9243	61.7784
PF3D7_0805000	10.775	15.0225	15.4592	15.2101	35.6937	64.595
PF3D7_1465200	174.896	158.282	157.947	189.666	155.219	134.105
PF3D7_1027100	587.042	459.265	400.724	253.439	352.441	208.941
PF3D7_0514900	137.325	82.8922	104.348	79.4718	102.117	69.3562
PF3D7_1408700	30.3647	45.1308	51.9122	39.0933	56.0913	50.3643
PF3D7_1142500	860.691	821.173	912.604	1371.9	964.17	670.77
PF3D7_1121800	0.568625	1.74008	1.1474	0.641647	1.7811	2.9332
PF3D7_1245000	1.84176	5.7971	7.54712	7.48178	8.12665	22.8013
PF3D7_1203600	22.0996	23.3201	20.9366	26.5346	27.7097	31.8411
PF3D7_1135900	94.1339	165.533	214.738	157.543	257.26	460.484
PF3D7_0609500	0.718767	0.942662	1.6735	2.60701	4.11124	2.78078
PF3D7_0415700	0	1.05145	0.279994	1.74473	2.94795	2.48135
PF3D7_0105000	54.084	42.7112	79.6159	40.4988	35.6396	14.3994
PF3D7_1316800	161.246	138.905	203.916	192.733	112.34	191.921
PF3D7_0928400	225.027	170.585	221.275	204.336	195.121	146.332
PF3D7_0717500	120.613	129.355	113.931	88.5575	219.29	366.205
PF3D7_1369300	13.8267	9.71091	17.0989	7.67324	14.8171	15.9017
PF3D7_MIT03100	38.3822	822.19	160.857	1355.02	407.717	1049.35
PF3D7_1031900	0.957958	5.58382	3.56864	11.4275	7.82767	11.2008
PF3D7_0529200	1.39826	17.7269	9.44109	15.2147	21.994	43.998
PF3D7_1405100	10.6041	21.6335	16.723	40.6156	23.5684	35.7376
PF3D7_1134700	335.491	282.294	291.703	193.074	257.929	127.702
PF3D7_1442100	3.38335	35.9911	28.3587	73.6296	35.9398	86.6818
PF3D7_1350000	1.67852	0.366896	3.12646	1.21762	5.8291	3.03048
PF3D7_1142700	116.617	131.908	146.376	139.011	133.578	92.9981
PF3D7_1111600	0.515197	6.98203	3.11877	6.47799	7.36711	19.1347
PF3D7_1012800	26.1331	21.5601	30.9532	30.8502	29.8955	27.6524
PF3D7_0409500	2.79633	24.7209	21.4128	36.6631	33.7663	77.8929
PF3D7_0218500	150.858	156.334	151.091	162.178	120.642	138.543
PF3D7_0720900	4.30454	26.0316	24.0533	34.3483	28.4318	65.8737
PF3D7_1308200	586.697	613.674	568.664	508.317	648.285	342.67
PF3D7_1302000	704.651	478.409	515.055	67.928	0.479554	0
PF3D7_0222200	0	0	0	0	0.67885	0
PF3D7_1241800	550.573	442.419	429.624	289.302	345.123	246.73
PF3D7_1032600	3.13922	4.39155	9.64789	13.3597	12.0561	12.6308
PF3D7_1025600	1.32964	137.18	81.7285	172.33	80.399	301.788
PF3D7_1219700	10.0477	14.056	10.2933	11.662	72.2495	66.3426
PF3D7_0531500	1.53529	0	0	0	0	0
PF3D7_1039000	419.613	224.402	389.023	604.375	313.077	311.03
PF3D7_1364400	62.7719	57.5651	56.8418	57.797	50.5821	46.461
PF3D7_0323700	542.514	450.41	445.942	283.84	308.003	396.693
PF3D7_1337600	0	0	0	0	0	0
PF3D7_0208600	6.28171	63.9973	58.5026	85.325	75.6547	207.947
PF3D7_1027600	5.83231	12.3842	11.2514	15.7145	33.0195	27.9365
PF3D7_0928150	23.9889	4.19485	22.3412	18.5619	5.88054	17.3242
PF3D7_0713100	103.37	85.041	92.6144	10.5466	1.78198	0
PF3D7_0908000	18.1897	22.651	53.1312	41.3179	38.7344	84.7315
PF3D7_1203900	515.846	387.354	417.669	506.833	433.742	598.186
PF3D7_0618800	2.17141	4.88193	9.24463	10.6511	5.57637	8.48077
PF3D7_1254600	0	0	1.17973	0	0	0
PF3D7_0210900	1122.81	1187.2	1087.56	1020.65	940.241	745.315
PF3D7_1224400	133.608	104.318	147.115	106.694	117.394	63.1848
PF3D7_1369700	95.886	59.7789	86.9705	62.0971	71.5373	35.6986
PF3D7_0306200	59.9816	114.82	116.167	170.969	119.746	172.051
PF3D7_1239500	1.14945	8.54254	9.90216	11.3957	14.206	29.4986
PF3D7_1478800	0	0	0	0.722723	0.610568	0
PF3D7_1427500	4.96597	21.9897	25.9591	31.2981	32.986	48.093
PF3D7_0627100	260.072	232.897	214.857	118.043	213.797	117.463
PF3D7_1009300	8.96287	25.3535	31.425	22.6925	24.5561	34.2677
PF3D7_1113600	224.142	167.946	165.299	116.968	102.224	121.269
PF3D7_0804900	120.56	105.046	123.527	95.6628	105.148	115.572
PF3D7_1146600	5.59662	12.5828	11.9881	11.5223	24.9561	58.7292
PF3D7_1368100	41.5871	26.0197	51.5224	91.5181	74.8219	86.5966
PF3D7_0316300	9.51916	151.662	152.681	190.621	225.283	698.728
PF3D7_1467600	54.3067	78.3038	90.1887	49.8276	110.993	89.0258
PF3D7_1432600	14.8448	18.0639	24.2297	34.193	22.3842	23.9989
PF3D7_1102700	2789.87	2823.09	2548.06	1178.93	2534.38	1003.02
PF3D7_1111200	50.4274	44.7172	44.2929	81.1362	50.1884	61.8877
PF3D7_1316400	6.70431	0	5.46335	1.62113	5.47823	7.78131
PF3D7_0714000	845.667	1005.92	1023.47	760.028	1127.7	2423.47
PF3D7_0816900	0	2.3176	0.987456	0.512761	1.73275	2.73469
PF3D7_1343100	1.18912	9.53046	7.38298	6.51745	25.425	43.3468
PF3D7_0932600	1.54767	21.6508	10.8103	28.4417	19.6018	40.7159
PF3D7_0307100	1566.72	1621.1	1750.2	2433.75	1837.79	1473.73
PF3D7_0900900	0	0	0	0	0	0
PF3D7_0111600	13.6829	17.9451	15.6838	23.9235	14.1907	22.2604
PF3D7_0924200	10.8764	16.1977	16.6968	30.4035	17.7747	17.0165
PF3D7_0405300	8.49682	10.8447	7.27652	5.10099	34.3156	18.6404
PF3D7_1401600	601.212	472.842	519.374	349.75	600.325	430.335
PF3D7_1340900	773.682	514.068	535.985	417.749	382.525	311.172
PF3D7_0614900	1.43395	18.4302	30.0479	18.5851	34.9171	115.688
PF3D7_0209700	515.322	517.103	449.694	266.577	359.244	191.411
PF3D7_1227900	47.7337	55.0494	72.0009	80.4414	74.6583	39.276
PF3D7_1031200	12.7722	10.9524	24.9337	17.58	62.2173	71.4593
PF3D7_1030400	53.6525	78.1835	74.9511	42.5794	128.711	81.6093
PF3D7_0108800	18.3424	13.4044	22.4368	37.0709	33.1077	34.7403
PF3D7_1401700	0.708158	0	2.63807	7.53437	12.1517	17.5343
PF3D7_1476600	15.681	26.5129	27.6605	6.42838	5.4308	12.7494
PF3D7_0415400	298.923	297.265	261.107	187.911	208.118	230.99
PF3D7_0626000	85.6568	56.5606	77.7097	59.2718	67.2758	30.6879
PF3D7_1253300	755.533	1069.48	828.576	262.21	515.356	241.242
PF3D7_0106400	516.667	455.001	456.861	639.846	605.581	370.111
PF3D7_0603000	112.299	95.809	110.843	58.4864	93.4611	64.0349
PF3D7_0610900	474.982	399.011	367.761	297.538	353.1	270.324
PF3D7_1105000	700.404	600.671	470.81	401.197	574.933	619.367
PF3D7_1338600	4.55525	35.5133	39.0063	34.1458	46.2171	137.593
PF3D7_0722300	87.4012	81.8903	87.1214	72.9783	90.0156	62.3443
PF3D7_1410200	562.575	494.133	474.677	417.488	445.777	247.411
PF3D7_0606300	0	1.64638	2.63053	0.910643	0.769326	0.485669
PF3D7_0525800	10.3298	25.5011	23.7677	7.34641	135.547	364.534
PF3D7_1026200	4.57157	15.7385	18.893	38.9663	15.876	30.6567
PF3D7_1347900	1.51415	9.50071	7.88025	11.1992	9.17014	20.2157
PF3D7_1200700	1623.5	2171.07	1412.87	222.996	755.407	333.566
PF3D7_1317800	3161.76	3416.97	3265.07	3753.87	3878.19	2842.68
PF3D7_0200500	0	0	0	0	0	0
PF3D7_1010500	3.38666	0.987023	3.15405	1.09188	7.3795	18.6345
PF3D7_1243800	64.2975	50.6386	71.7661	82.8404	63.3674	82.2854
PF3D7_1301400	613.286	377.693	932.928	87.6815	0	0
PF3D7_0821000	3.34429	19.3435	18.448	24.3843	28.7983	71.3936
PF3D7_0526300	243.108	157.633	157.376	131.544	127.813	65.781
PF3D7_0803600	62.2727	64.2543	63.669	43.0223	70.2425	91.9791
PF3D7_0732400	1.50322	0	2.33328	0	0	0
PF3D7_1338800	0.535565	19.4329	14.9634	27.7134	15.9732	77.0784
PF3D7_1203500	346.476	433.785	405.188	241.252	360.183	273.082
PF3D7_1147000	0	0.399373	1.03312	0.252458	0.586521	3.16409
PF3D7_1029800	1.56662	30.1344	24.5601	36.3662	35.2032	101.824
PF3D7_0419100	2.59924	7.67004	7.56474	20.1123	14.3363	18.436
PF3D7_0401100	0	0	0	0	0	0
PF3D7_1448700	32.8388	25.2876	28.058	40.7955	15.7553	18.3383
PF3D7_1445300	11.5666	28.2752	26.3807	21.9182	36.8408	47.0016
PF3D7_0213600	2.14204	5.68793	5.76309	5.14117	13.03	17.1063
PF3D7_1454400	253.774	215.787	262.965	326.374	222.176	191.901
PF3D7_0717300	119.507	107.187	136.394	86.9407	154.965	113.744
PF3D7_0609400	42.8248	52.2377	71.7901	102.643	86.5437	94.8289
PF3D7_0509100	3.98527	54.0495	47.5596	39.353	66.6436	180.908
PF3D7_1470500	0.14056	2.82661	2.3563	1.63142	6.08727	15.2264
PF3D7_1030200	7.59041	10.1207	12.0174	4.95556	30.0811	72.4358
PF3D7_1217100	23.86	17.3846	32.9203	48.7197	24.5511	34.6447
PF3D7_0717600	4.16013	14.2895	16.3278	9.19714	29.1371	77.868
PF3D7_1312300	2.94492	27.0358	10.5135	26.1101	17.6466	44.0543
PF3D7_0701600	0.871662	1.52424	0.811792	0	0	0
PF3D7_1463500	141.404	158.807	105.667	36.5802	88.1834	81.7646
PF3D7_0414000	7.37431	80.0675	69.9268	94.2794	83.5929	223.812
PF3D7_1212000	35.5649	58.1669	63.1269	96.7217	72.481	155.4
PF3D7_1404900	342.718	280.407	319.648	311.659	340.992	301.58
PF3D7_0316900	153.57	103.258	138.057	113.236	148.27	83.977
PF3D7_1115000	1.02718	32.3314	31.5686	39.7401	35.2517	94.3152
PF3D7_0501900	13.3621	16.5085	20.0192	24.7243	22.7863	24.5741
PF3D7_1131500	0.746735	1.30579	1.39089	4.33353	3.66103	14.6375
PF3D7_0610000	1.03798	36.9066	21.9116	27.776	33.9262	104.945
PF3D7_1122400	108.366	84.5352	106.059	81.7478	75.9549	99.7487
PF3D7_1115300	162.507	119.895	117.798	128.871	84.9573	44.5533
PF3D7_0811300	1677.83	1621.93	1429.89	821.049	1520.44	862.979
PF3D7_1458600	145.196	109.728	128.991	68.264	96.2551	48.3255
PF3D7_1025500	0.565618	2.96723	3.37752	2.41357	4.75772	13.3184
PF3D7_1456700	53.0667	44.8275	48.3573	44.2202	41.8942	42.2823
PF3D7_0529300	2.63925	5.27446	9.83188	21.1511	16.3284	27.2287
PF3D7_0526400	3.62303	8.3513	10.736	9.87563	17.4936	26.5045
PF3D7_0604000	0.764022	2.8947	1.58121	3.36644	3.12149	4.72937
PF3D7_1305900	12.4826	21.2535	47.3168	79.6419	34.1782	63.7127
PF3D7_1426400	0	0	9.31602	6.45009	2.72457	32.1067
PF3D7_1141000	0.465803	0.407267	2.81976	0.901065	3.80617	2.40281
PF3D7_1433800	0.832354	8.34118	11.3296	8.48416	12.6609	33.9527
PF3D7_0303800	3.84591	12.1054	11.8198	24.5509	12.4132	33.1308
PF3D7_API01700	0	0	0	0	0	0
PF3D7_1472600	2.58176	5.64329	8.71607	6.86709	22.1509	96.2211
PF3D7_0525300	0	2.30513	3.68304	3.18751	3.23143	6.11993
PF3D7_1401500	73.9634	27.9338	99.4527	158.105	72.5959	59.149
PF3D7_0702200	198.057	132.736	175.452	91.755	163.78	115.205
PF3D7_0830500	1470.95	2068.01	1455.95	236.996	766.761	472.64
PF3D7_0502300	0	0	0	0	0.580794	5.13311
PF3D7_1425800	14.3169	29.289	32.104	23.3929	37.9353	102.533
PF3D7_1120200	72.0199	65.2049	85.7267	86.1461	47.7059	96.2844
PF3D7_0727200	167.922	147.009	129.418	147.994	89.1793	94.5363
PF3D7_1425000	0	5.85328	3.11738	22.6628	16.4108	0
PF3D7_1445800	2.54187	5.27829	3.55092	3.84146	7.52916	10.3257
PF3D7_1405300	0.493626	5.46685	6.58934	11.7769	8.73929	12.2224
PF3D7_1116200	72.0726	58.5672	47.3804	54.9477	55.4277	71.7317
PF3D7_1119700	6.3515	4.12021	7.25095	2.77438	6.19444	6.12998
PF3D7_1471600	0	0.76405	0	0.28174	1.3091	6.01036
PF3D7_0519500	80.3143	78.9716	87.2838	150.31	114.075	120.652
PF3D7_1126100	2.09405	8.1246	9.26355	12.5322	9.411	19.0385
PF3D7_1101400	0	0	0	0	0	0
PF3D7_API03900	0	0	0	0	0	0
PF3D7_1431900	1.41111	2.15911	4.43538	3.75333	13.8366	26.3867
PF3D7_1234200	6.592	33.9322	29.5721	43.7333	27.9186	83.7176
PF3D7_1104300	3.9688	18.4696	22.5349	27.8615	21.341	73.5698
PF3D7_1337800	7.96148	13.1485	13.8681	5.84665	36.1416	65.1013
PF3D7_1440200	1.35417	5.00923	5.43271	12.0903	5.70285	16.4425
PF3D7_1119000	29.2946	66.5117	68.2062	138.472	94.0114	176.705
PF3D7_1440300	4.62545	16.4146	18.7514	30.264	25.5675	40.1409
PF3D7_1361500	0.60381	14.5181	10.4032	7.00818	32.07	137.981
PF3D7_0513200	162.564	156.692	155.06	123.244	168.98	102.239
PF3D7_0109800	176.575	168.736	133.873	129.653	125.79	109.558
PF3D7_1120100	2996.8	2601.88	2664.96	3085.25	2891.5	2000.15
PF3D7_0604500	1498.38	1549.48	1482.02	956.162	1673.87	1061.3
PF3D7_1231200	7.93506	4.36829	7.39004	3.69533	25.2152	90.6575
PF3D7_1225900	0.761551	7.15788	8.51093	11.9695	7.15621	20.8205
PF3D7_1235900	327.219	271.722	307.38	220.814	281.473	224.826
PF3D7_1333000	108.129	126.158	144.718	275.659	160.033	232.344
PF3D7_0914000	29.0018	23.0669	34.5029	37.6427	28.1318	28.1833
PF3D7_1016400	550.166	465.463	455.584	686.364	374.188	322.973
PF3D7_0108400	65.5696	83.897	97.4076	90.3348	115.259	80.8464
PF3D7_0817700	1.56967	4.50936	6.05627	3.36175	38.1118	117.869
PF3D7_0607300	1.6127	4.70011	5.25675	8.57905	8.34586	26.3434
PF3D7_0111500	8.30126	68.8345	47.1347	87.8023	73.0828	259.415
PF3D7_1103300	0	0	0	5.62483	0	0
PF3D7_0101500	10.1374	11.3085	23.4399	3.38105	0	0
PF3D7_1348400	1.13454	9.29969	8.27683	14.8142	12.747	28.6282
PF3D7_1243300	4.79777	4.19485	11.1706	0	7.84071	9.89956
PF3D7_1228000	2.70721	23.67	22.2712	37.5312	36.1312	89.8408
PF3D7_1314700	10.6081	48.694	54.3374	97.0071	62.8439	176.849
PF3D7_1139800	17.4826	14.2417	17.7909	17.8168	17.909	13.3734
PF3D7_0701300	0	0	0	0	0	0
PF3D7_1403800	5.34813	5.54601	5.55996	6.73667	14.3298	26.3047
PF3D7_0520300	122.301	109.89	114.351	153.826	87.2946	99.7437
PF3D7_1227100	86.6204	115.453	109.33	188.822	126.392	174.362
PF3D7_0404900	27.2173	30.6574	44.0734	29.4082	74.5335	153.553
PF3D7_1415000	2.97793	32.1123	31.894	39.3641	34.8777	141.325
PF3D7_1113800	2.58424	11.136	14.0967	17.4967	16.2898	43.991
PF3D7_1324700	129.011	116.332	89.1718	55.0243	99.3214	85.6323
PF3D7_0505000	26.3559	21.5915	22.9471	24.0995	19.2285	9.76818
PF3D7_0506700	50.1273	35.9901	39.8691	80.3348	38.7177	62.2851
PF3D7_1123000	324.767	248.07	238.659	171.407	252.439	152.225
PF3D7_0104800	6.74869	13.6324	10.403	11.9295	16.9238	35.0526
PF3D7_1308500	3.18818	8.59489	9.64991	17.4741	15.1966	34.2624
PF3D7_1368800	2.30947	9.92797	13.5324	14.3333	12.3449	43.0862
PF3D7_1367000	62.1967	120.07	100.471	181.006	104.118	216.92
PF3D7_0915800	0	2.91815	6.21668	3.22816	4.54534	13.1994
PF3D7_0616700	7.98339	9.90206	14.5243	23.8833	21.9975	32.5622
PF3D7_0915000	4.42021	14.7343	37.8214	22.9798	42.2134	108.876
PF3D7_0911900	1368.23	929.812	1017.3	744.327	996.479	664.981
PF3D7_1425300	8.23063	50.0143	47.5249	70.4531	98.5274	287.859
PF3D7_1222500	37.2688	32.5853	37.9834	28.7356	35.4807	45.7042
PF3D7_1026100	30.0443	34.8213	54.0093	49.3333	61.0891	55.1444
PF3D7_1354700	0	1.64504	3.5045	1.8198	1.5374	5.82327
PF3D7_1222200	3.97057	6.9432	0	0	6.48887	12.2891
PF3D7_1412100	4.9847	34.8663	32.9605	55.284	35.7075	75.9395
PF3D7_1401900	1.12283	6.38124	8.88855	8.41668	19.0379	68.9253
PF3D7_1101000	1.43217	0	0	0	0	0
PF3D7_0523700	3.74826	5.05629	5.78477	8.07942	14.0888	6.62917
PF3D7_1023500	0	17.4126	18.5474	40.2759	23.6701	78.4494
PF3D7_1024900	2.27991	10.6315	8.99883	22.5768	10.9116	23.9695
PF3D7_1400900	0	0	0	0	0	0
PF3D7_1130000	84.7555	74.3561	51.8633	52.4708	100.65	70.3683
PF3D7_0705800	6.92462	19.0282	22.1109	32.5312	18.5914	38.7818
PF3D7_0517800	1.60595	5.61653	11.9652	0	29.5257	16.5683
PF3D7_1433300	26.9824	8.52708	31.4871	38.9895	21.5166	47.6252
PF3D7_1361000	72.0232	65.5466	83.3181	87.4061	133.619	60.519
PF3D7_0831500	535.095	576.954	478.363	440.402	372.305	228.176
PF3D7_1351300	11.631	17.103	6.89315	2.55674	47.0875	27.8169
PF3D7_0725200	253.834	217.908	267.856	274.717	247.558	206.439
PF3D7_0802000	399.995	384.384	533.075	1090.62	612.559	824.153
PF3D7_0318900	166.696	163.915	266.355	342.109	268.988	316.497
PF3D7_0222500	0	1.05864	1.12763	0	0	0
PF3D7_1435100	1.88518	12.1972	23.5263	24.7979	21.5658	39.676
PF3D7_1351900	561.38	480.436	452.934	337.526	475.804	391.329
PF3D7_1452800	1.67608	8.79269	4.68287	12.1585	10.2717	15.5626
PF3D7_0406700	1.98119	15.4167	29.5217	23.1865	33.6724	105.059
PF3D7_1307500	7.05282	1.29821	8.29692	5.38548	28.2084	50.9339
PF3D7_1037300	776.563	585.263	620.858	632.145	813.182	398.544
PF3D7_1348500	1.12503	21.3943	25.9319	32.1003	39.2993	117.228
PF3D7_1118400	34.0124	36.4341	39.2282	34.2045	55.9525	49.4978
PF3D7_1024100	0.854203	8.21543	7.95532	14.3208	10.3535	34.3694
PF3D7_1007100	0	0	7.63802	6.34596	20.1044	59.2281
PF3D7_0300700	0	0	0	0	0.849942	1.07312
PF3D7_1006400	0.389799	3.74895	5.26387	8.48294	7.32579	16.287
PF3D7_0808400	29.658	36.3568	42.4281	38.4448	26.7325	32.8058
PF3D7_1014700	42.2958	85.4378	68.9337	322.336	104.278	154.23
PF3D7_1307600	17.9155	32.3928	30.6162	37.0117	62.8205	128.485
PF3D7_1344300	1.7699	2.90152	5.76916	3.63773	9.15939	32.7153
PF3D7_0924900	0	0.906994	1.93221	3.01004	9.32409	8.56178
PF3D7_0921500	0.90953	6.36185	3.38824	3.51885	2.97278	4.69174
PF3D7_0821500	139.733	102.109	113.725	88.7802	106.812	41.8529
PF3D7_0324500	0	0	0	0	0	0
PF3D7_1007700	163.049	222.286	253.141	674.513	377.663	618.56
PF3D7_1336800	380.555	380.095	429.965	437.851	413.945	342.904
PF3D7_0529800	5.19316	34.8109	34.5148	40.0311	51.3713	139.138
PF3D7_1366100	41.4234	57.7651	22.4633	8.11451	70.695	90.8812
PF3D7_1310100	0	3.33586	5.15224	9.77915	7.48219	5.31388
PF3D7_0805300	1.63406	4.6433	5.4532	2.89756	10.9043	22.6182
PF3D7_1117400	15.6505	21.9837	25.5669	44.4196	43.8158	90.7901
PF3D7_1437500	80.4332	63.5396	69.652	73.0194	47.2749	80.7979
PF3D7_1312100	1.29088	13.6568	15.6288	11.237	20.8851	61.5282
PF3D7_0801300	8.57334	10.9556	11.0554	5.10294	16.1664	43.5445
PF3D7_1000600	3.6788	11.5258	11.4204	30.2447	16.2826	28.1489
PF3D7_0617900	568.587	497.134	492.229	430.994	572.882	631.279
PF3D7_1350800	0	1.35866	2.89441	0	5.07901	8.01584
PF3D7_1324300	4.3944	7.85767	8.00052	7.9574	17.3328	8.48777
PF3D7_1248600	28.0721	51.915	43.4148	25.0125	127.342	93.5544
PF3D7_API05500	0	0	0	0	0	0
PF3D7_1108200	20.3499	34.4731	44.2217	79.1411	40.5315	38.4902
PF3D7_0808100	9.70978	7.24111	11.8798	13.811	10.3454	10.9013
PF3D7_0715000	138.417	190.829	250.346	245.638	264.563	209.443
PF3D7_1354400	132.035	133.788	124.872	96.0271	122.106	125.13
PF3D7_0724900	0.38242	1.83899	2.67115	0.554824	7.10898	12.3292
PF3D7_0217300	161.018	87.5802	135.137	114.993	107.858	66.6409
PF3D7_0722000	212.977	218.83	244.5	232.653	187.904	220.299
PF3D7_1334700	503.38	545.055	499.144	184.072	420.849	186.435
PF3D7_1322500	2.04402	18.4673	24.9587	12.9604	60.8699	183.23
[truncated: 5,128 more rows]

## Sheet: Significant genes with info
Gene ID	Genomic Location (Gene)	Product Description	Gene Type	Is Pseudo	Gene Name	Previous ID(s)
[truncated: 256 more rows]

[truncated: 1 more sheets: legend for previous tab]
