# Supplementary material for: A system for functional studies of the major virulence factor of malaria parasites
Source: eLife. 2025 Dec 29;13:RP103542. doi: 10.7554/eLife.103542 (PMC12747541; doi:10.7554/eLife.103542)
Supplement: Figure 2—source data 1. [file elife-103542-fig2-data1.xlsx]

## Sheet: Isa_13092019
		#cells	#cells		percent with full export
		control	WR		control	WR
		PfEMP1	PfEMP1		PfEMP1	PfEMP1
Exp1	Exported	21	3		80.7692	11.5385
	Arrested	5	23
Exp2	Exported	21	4		80.7692	15.3846
	Arrested	5	22
Exp3	Exported	26	14		100	53.8462
	Arrested	0	12
Exp 4	Exported	21	4		80.7692	15.3846
	Arrested	5	22
