# Supplementary material for: A system for functional studies of the major virulence factor of malaria parasites
Source: eLife. 2025 Dec 29;13:RP103542. doi: 10.7554/eLife.103542 (PMC12747541; doi:10.7554/eLife.103542)
Supplement: Figure 2—source data 2. [file elife-103542-fig2-data2.xlsx]

## Sheet: Sheet1
Replicate1
PfEMP1	N	FB	PB	FE				FB, full block
-	34	0	9	25	0.735294	73.5294	percent with full export	PB, partial block
+	18	4	11	3	0.166667	16.6667	percent with full export	FE, full export
REX1
-	18	0	2	16	0.888889			N, cells in replicate
+	12	0	1	11	0.916667
Replicate2
PfEMP1	N	FB	PB	FE
-	76	1	19	53	0.697368	69.7368	percent with full export
+	48	20	17	10	0.208333	20.8333	percent with full export
REX1
-	27	0	4	23	0.851852
+	31	0	5	26	0.83871
Replicate3
PfEMP1	N	FB	PB	FE
-	60	1	11	47	0.783333	78.3333	percent with full export
+	30	11	18	1	0.0333333	3.33333	percent with full export
REX1					#DIV/0!
-	35	0	5	25	0.714286
+	25	0	7	18	0.72
