# Supplementary material for: A system for functional studies of the major virulence factor of malaria parasites
Source: eLife. 2025 Dec 29;13:RP103542. doi: 10.7554/eLife.103542 (PMC12747541; doi:10.7554/eLife.103542)
Supplement: Figure 3—source data 5. [file elife-103542-fig3-data5.xlsx]

## Sheet: Tabelle1
per mmm2	2023-06-15								Average
pictures									3D7		IT4		var2CSA (3D7)		var2csa (IT4)
3D7		IT4		var2CSA (3D7)		var2csa (IT4)			sBSA	sCSA	sBSA	sCSA	sBSA	sCSA	sBSA	sCSA
sBSA	sCSA	sBSA	sCSA	sBSA	sCSA	sBSA	sCSA		1.13333	1.66667	0.933333	3.2	1.13333	0.933333	371.067	0.6
6.18365	6.18365	0	0	0	6.18365	2677.52	0
6.18365	0	6.18365	0	37.1019	0	2566.22	6.18365		per mm2
24.7346	0	0	12.3673	18.551	0	3079.46	6.18365		7.00814	10.3061	5.77141	19.7877	7.00814	5.77141	2294.55	3.71019
24.7346	12.3673	0	6.18365	6.18365	0	2492.01	6.18365
6.18365	12.3673	6.18365	6.18365	6.18365	0	1805.63	6.18365
6.18365	6.18365	6.18365	0	6.18365	0	2751.72	6.18365
0	30.9183	24.7346	0	6.18365	6.18365	2584.77	0
6.18365	6.18365	6.18365	0	6.18365	0	1892.2	12.3673
0	6.18365	12.3673	0	0	0	1743.79	0
0	55.6529	0	0	6.18365	6.18365	1595.38	0
6.18365	12.3673	0	37.1019	0	12.3673	2529.11	0
6.18365	0	18.551	55.6529	6.18365	30.9183	2813.56	12.3673
12.3673	0	0	43.2856	0	0	2504.38	0
0	6.18365	6.18365	49.4692	0	18.551	1694.32	0
0	0	0	86.5711	6.18365	6.18365	1688.14	0
per mmm2	2023-06-21
pictures									Average
3D7		IT4		var2CSA (3D7)		var2csa (IT4)			3D7		IT4		var2CSA (3D7)		var2csa (IT4)
sBSA	sCSA	sBSA	sCSA	sBSA	sCSA	sBSA	sCSA		sBSA	sCSA	sBSA	sCSA	sBSA	sCSA	sBSA	sCSA
0	12.3673	0	6.18365	12.3673	0	2096.26	0		0.466667	1.86667	0.8	0.733333	1.2	2.4	191.2	0.4
6.18365	0	0	0	6.18365	0	1811.81	6.18365
0	24.7346	18.551	0	12.3673	24.7346	1212	6.18365		per mm2
0	12.3673	0	0	6.18365	43.2856	1181.08	6.18365		2.8857	11.5428	4.94692	4.53468	7.42038	14.8408	1182.31	2.47346
12.3673	6.18365	12.3673	6.18365	6.18365	37.1019	927.548	12.3673
0	6.18365	0	6.18365	0	6.18365	735.855	0
6.18365	0	0	0	0	74.2038	1304.75	6.18365
0	0	0	0	0	12.3673	1576.83	0
0	0	6.18365	0	0	12.3673	754.405	0
6.18365	0	18.551	0	0	0	1422.24	0
0	24.7346	0	6.18365	30.9183	0	1088.32	0
0	49.4692	0	18.551	12.3673	0	871.895	0
6.18365	12.3673	0	0	6.18365	0	698.753	0
0	6.18365	6.18365	0	18.551	12.3673	1026.49	0
6.18365	18.551	12.3673	24.7346	0	0	1026.49	0
per mmm2	2023-07-14
pictures
3D7		IT4		var2CSA (3D7)		var2csa (IT4)
sBSA	sCSA	sBSA	sCSA	sBSA	sCSA	sBSA	sCSA
6.18365	24.7346	0	6.18365	24.7346	6.18365	1280.02	30.9183
0	6.18365	24.7346	18.551	0	6.18365	711.12	37.1019		Average
0	49.4692	6.18365	0	0	0	1471.71	6.18365		3D7		IT4		var2CSA (3D7)		var2csa (IT4)
0	6.18365	0	12.3673	61.8365	6.18365	1038.85	12.3673		sBSA	sCSA	sBSA	sCSA	sBSA	sCSA	sBSA	sCSA
12.3673	12.3673	0	6.18365	18.551	12.3673	599.814	18.551		1.4	1.46667	1.66667	1.2	4.53333	0.8	153.333	3.53333
55.6529	0	18.551	0	6.18365	24.7346	482.325	12.3673
0	18.551	24.7346	0	12.3673	0	1174.89	0		per mm2
12.3673	0	6.18365	6.18365	12.3673	0	661.651	6.18365		8.65711	9.06936	10.3061	7.42038	28.0326	4.94692	948.16	21.8489
6.18365	0	12.3673	6.18365	80.3875	0	599.814	12.3673
12.3673	6.18365	30.9183	0	6.18365	12.3673	964.65	6.18365
0	0	0	0	61.8365	0	865.711	0
6.18365	0	24.7346	0	24.7346	0	1137.79	0
6.18365	0	6.18365	49.4692	30.9183	0	816.242	0
12.3673	12.3673	0	6.18365	30.9183	0	1292.38	166.959
0	0	0	0	49.4692	6.18365	1125.42	18.551
