# Supplementary material for: A system for functional studies of the major virulence factor of malaria parasites
Source: eLife. 2025 Dec 29;13:RP103542. doi: 10.7554/eLife.103542 (PMC12747541; doi:10.7554/eLife.103542)
Supplement: Figure 3—source data 6. [file elife-103542-fig3-data6.xlsx]

## Sheet: Tabelle1
per mmm2	2023-06-15								Average
pictures									3D7		IT4		var2CSA (3D7)		var2csa (IT4)
3D7		IT4		var2CSA (3D7)		var2csa (IT4)			sBSA	sCSA	sBSA	sCSA	sBSA	sCSA	sBSA	sCSA
sBSA	sCSA	sBSA	sCSA	sBSA	sCSA	sBSA	sCSA		29.5932	27.8264	17.2259	9.27548	102.914	20.7594	251.321	22.5262
0	74.2038	18.551	6.18365	111.306	0	197.877	24.7346
30.9183	61.8365	6.18365	0	210.244	30.9183	296.815	18.551		per mm2
37.1019	37.1019	12.3673	12.3673	117.489	18.551	426.672	6.18365		38.3386	26.3836	17.3142	9.06936	100.587	19.7877	240.75	21.0244
6.18365	18.551	18.551	12.3673	154.591	0	661.651	55.6529
37.1019	30.9183	6.18365	6.18365	111.306	6.18365	241.162	24.7346
6.18365	105.122	24.7346	0	333.917	55.6529	296.815	37.1019
68.0202	6.18365	30.9183	24.7346	136.04	37.1019	197.877	0
18.551	12.3673	6.18365	12.3673	43.2856	43.2856	253.53	18.551
0	0	0	12.3673	6.18365	6.18365	160.775	18.551
12.3673	18.551	6.18365	12.3673	37.1019	12.3673	160.775	12.3673
30.9183	6.18365	37.1019	12.3673	43.2856	43.2856	173.142	24.7346
55.6529	6.18365	12.3673	12.3673	61.8365	0	272.081	12.3673
30.9183	12.3673	49.4692	6.18365	37.1019	18.551	55.6529	43.2856
80.3875	0	12.3673	0	37.1019	18.551	123.673	18.551
160.775	6.18365	18.551	6.18365	68.0202	6.18365	92.7548	0
per mmm2	2023-06-21
pictures									Average
3D7		IT4		var2CSA (3D7)		var2csa (IT4)			3D7		IT4		var2CSA (3D7)		var2csa (IT4)
sBSA	sCSA	sBSA	sCSA	sBSA	sCSA	sBSA	sCSA		sBSA	sCSA	sBSA	sCSA	sBSA	sCSA	sBSA	sCSA
6.18365	0	0	6.18365	12.3673	24.7346	476.141	0		3.71019	3.29795	3.71019	6.59589	22.2611	9.89384	392.044	3.71019
12.3673	0	6.18365	37.1019	12.3673	0	463.774	12.3673
6.18365	0	6.18365	6.18365	24.7346	0	488.508	0		per mm2
0	0	0	6.18365	18.551	6.18365	377.203	0		3.71019	3.29795	3.71019	6.59589	22.2611	9.89384	392.044	3.71019
0	0	6.18365	0	12.3673	6.18365	315.366	0
0	0	12.3673	0	12.3673	6.18365	717.304	0
6.18365	0	6.18365	6.18365	6.18365	18.551	358.652	0
0	0	0	0	6.18365	24.7346	581.263	6.18365
0	0	0	0	6.18365	24.7346	389.57	18.551
0	12.3673	0	18.551	6.18365	6.18365	185.51	6.18365
12.3673	0	6.18365	0	24.7346	6.18365	284.448	0
6.18365	18.551	6.18365	12.3673	37.1019	6.18365	278.264	0
6.18365	12.3673	0	0	43.2856	6.18365	315.366	12.3673
0	0	6.18365	6.18365	68.0202	12.3673	383.386	0
0	6.18365	0	0	43.2856	0	265.897	0
per mmm2	2023-07-14
pictures
3D7		IT4		var2CSA (3D7)		var2csa (IT4)
sBSA	sCSA	sBSA	sCSA	sBSA	sCSA	sBSA	sCSA
0	0	0	0	30.9183	0	105.122	6.18365
37.1019	18.551	6.18365	6.18365	24.7346	0	80.3875	12.3673		Average
6.18365	0	6.18365	0	18.551	0	37.1019	12.3673		3D7		IT4		var2CSA (3D7)		var2csa (IT4)
12.3673	0	12.3673	18.551	12.3673	6.18365	68.0202	12.3673		sBSA	sCSA	sBSA	sCSA	sBSA	sCSA	sBSA	sCSA
0	0	12.3673	12.3673	0	6.18365	476.141	0		1.13333	0.666667	1.33333	0.866667	1.86667	0.533333	38.5333	2.06667
0	6.18365	0	6.18365	6.18365	6.18365	383.386	24.7346
0	6.18365	6.18365	12.3673	24.7346	0	265.897	0		per mm2
6.18365	0	0	0	24.7346	0	259.713	12.3673		7.00814	4.12243	8.24487	5.35916	11.5428	3.29795	238.277	12.7795
12.3673	6.18365	18.551	6.18365	6.18365	18.551	544.161	12.3673
12.3673	0	0	0	0	0	352.468	0
0	6.18365	18.551	6.18365	6.18365	0	148.408	30.9183
18.551	6.18365	24.7346	0	0	0	160.775	30.9183
0	0	18.551	0	0	0	55.6529	24.7346
0	12.3673	0	12.3673	12.3673	6.18365	593.631	6.18365
0	0	0	0	6.18365	6.18365	43.2856	6.18365
