# Supplementary material for: A system for functional studies of the major virulence factor of malaria parasites
Source: eLife. 2025 Dec 29;13:RP103542. doi: 10.7554/eLife.103542 (PMC12747541; doi:10.7554/eLife.103542)
Supplement: Figure 3—source data 7. [file elife-103542-fig3-data7.xlsx]

## Sheet: Tabelle1
per mmm2	3042023								Average
pictures									809100			var66
809100			var66						GFP	CD36	ICAM1	GFP	CD36	ICAM1
GFP	CD36	ICAM1	GFP	CD36	ICAM1				2.4	36.6	3.46667	2.93333	95.1333	5
24.7346	6.18365	12.3673	18.551	593.631	37.1019
0	18.551	24.7346	6.18365	686.385	6.18365				per mm2
0	123.673	30.9183	12.3673	581.263	30.9183				14.8408	226.322	21.4367	18.1387	588.271	30.9183
0	24.7346	49.4692	18.551	667.834	18.551
12.3673	12.3673	37.1019	18.551	457.59	18.551
6.18365	278.264	6.18365	30.9183	432.856	30.9183
12.3673	204.06	12.3673	12.3673	878.079	49.4692
49.4692	340.101	12.3673	30.9183	395.754	12.3673
24.7346	432.856	6.18365	6.18365	408.121	0
0	587.447	12.3673	18.551	575.08	30.9183
30.9183	476.141	18.551	37.1019	630.732	68.0202
12.3673	383.386	18.551	24.7346	537.978	18.551
37.1019	247.346	24.7346	24.7346	581.263	43.2856
6.18365	179.326	18.551	12.3673	772.956	68.0202
6.18365	80.3875	37.1019	0	624.549	30.9183
per mmm2	5042023
pictures									Average
809100			var66						809100			var66
GFP	CD36	ICAM1	GFP	CD36	ICAM1				GFP	CD36	ICAM1	GFP	CD36	ICAM1
18.551	160.775	12.3673	55.6529	822.426	18.551				2.4	24.4	2.33333	3.6	115.267	3.53333
0	247.346	0	30.9183	803.875	24.7346
0	204.06	24.7346	43.2856	729.671	74.2038				per mm2
37.1019	129.857	0	6.18365	358.652	24.7346				14.8408	150.881	14.4285	22.2611	712.769	21.8489
6.18365	247.346	24.7346	18.551	315.366	6.18365
6.18365	30.9183	6.18365	37.1019	779.14	30.9183
0	18.551	30.9183	24.7346	568.896	24.7346
24.7346	24.7346	24.7346	37.1019	383.386	24.7346
6.18365	43.2856	18.551	18.551	482.325	6.18365
43.2856	30.9183	37.1019	24.7346	989.384	6.18365
12.3673	18.551	12.3673	0	1032.67	18.551
24.7346	302.999	12.3673	18.551	1267.65	18.551
18.551	259.713	0	12.3673	618.365	0
24.7346	234.979	0	6.18365	779.14	24.7346
0	309.183	12.3673	0	760.589	24.7346
per mmm2	31052023
pictures
809100			var66
GFP	CD36	ICAM1	GFP	CD36	ICAM1
18.551	12.3673	24.7346	6.18365	234.979	61.8365
6.18365	12.3673	6.18365	12.3673	222.611	68.0202				Average
6.18365	30.9183	24.7346	6.18365	241.162	105.122				809100			var66
0	6.18365	12.3673	18.551	340.101	24.7346				GFP	CD36	ICAM1	GFP	CD36	ICAM1
43.2856	12.3673	0	6.18365	364.835	86.5711				2.2	4.33333	1.86667	2.4	45.4667	9.4
6.18365	43.2856	18.551	37.1019	352.468	92.7548
0	49.4692	12.3673	24.7346	259.713	117.489				per mm2
55.6529	6.18365	6.18365	18.551	210.244	43.2856				13.604	26.7958	11.5428	14.8408	281.15	58.1263
6.18365	30.9183	6.18365	12.3673	253.53	18.551
12.3673	24.7346	6.18365	30.9183	259.713	30.9183
0	37.1019	6.18365	18.551	315.366	37.1019
6.18365	24.7346	12.3673	12.3673	333.917	37.1019
24.7346	49.4692	18.551	6.18365	253.53	80.3875
6.18365	37.1019	18.551	6.18365	321.55	12.3673
12.3673	24.7346	0	6.18365	253.53	55.6529
