# Supplementary material for: A system for functional studies of the major virulence factor of malaria parasites
Source: eLife. 2025 Dec 29;13:RP103542. doi: 10.7554/eLife.103542 (PMC12747541; doi:10.7554/eLife.103542)
Supplement: Figure 4—source data 6. [file elife-103542-fig4-data6.xlsx]

## Sheet: Tabelle1
per mmm2									Average
pictures									native	5112022			panned	4052023
native	5112022			panned	4052023				GFP	CD36	ICAM1	EPCR	GFP	CD36	ICAM1	EPCR
GFP	CD36	ICAM1	EPCR	GFP	CD36	ICAM1	EPCR		3.36667	5.1	3.7	13.4333	5.1	15	172.933	250.9
12.3673	43.2856	12.3673	117.489	30.9183	105.122	550.345	1249.1
6.18365	18.551	12.3673	80.3875	61.8365	129.857	742.038	1224.36		per mm2
12.3673	18.551	6.18365	111.306	30.9183	86.5711	958.466	1181.08		20.8183	31.5366	22.8795	83.0671	31.5366	92.7548	1069.36	1551.48
0	18.551	24.7346	142.224	24.7346	86.5711	1150.16	1273.83
30.9183	55.6529	37.1019	105.122	30.9183	98.9384	1212	1255.28
6.18365	18.551	6.18365	68.0202	24.7346	61.8365	791.507	1162.53
12.3673	6.18365	18.551	55.6529	18.551	173.142	581.263	853.344
12.3673	12.3673	49.4692	111.306	18.551	148.408	896.629	1378.95
6.18365	12.3673	12.3673	74.2038	43.2856	92.7548	933.731	1960.22
30.9183	12.3673	18.551	49.4692	30.9183	86.5711	507.059	1743.79
0	55.6529	18.551	117.489	49.4692	74.2038	1651.03	2417.81
6.18365	30.9183	18.551	74.2038	0	92.7548	1273.83	1613.93
37.1019	80.3875	6.18365	80.3875	43.2856	68.0202	1261.46	1898.38
12.3673	80.3875	12.3673	74.2038	30.9183	105.122	1119.24	1787.08
49.4692	30.9183	6.18365	55.6529	37.1019	123.673	970.833	1972.58
43.2856	37.1019	61.8365	61.8365	30.9183	49.4692	1255.28	2213.75
30.9183	12.3673	49.4692	61.8365	12.3673	68.0202	1045.04	2454.91
12.3673	30.9183	74.2038	55.6529	24.7346	86.5711	1273.83	2133.36
30.9183	74.2038	30.9183	49.4692	24.7346	148.408	1663.4	1861.28
30.9183	30.9183	55.6529	55.6529	49.4692	142.224	840.977	1651.03
0	24.7346	18.551	74.2038	24.7346	105.122	1335.67	816.242
18.551	6.18365	6.18365	86.5711	18.551	68.0202	995.568	1106.87
12.3673	6.18365	6.18365	74.2038	30.9183	68.0202	1007.94	1212
30.9183	43.2856	0	86.5711	24.7346	86.5711	1094.51	1137.79
55.6529	24.7346	12.3673	61.8365	18.551	80.3875	822.426	1372.77
12.3673	6.18365	55.6529	61.8365	18.551	68.0202	1131.61	1409.87
6.18365	43.2856	18.551	74.2038	43.2856	61.8365	1366.59	1564.46
0	68.0202	6.18365	123.673	55.6529	86.5711	1348.04	1737.61
18.551	12.3673	30.9183	117.489	30.9183	55.6529	1032.67	1267.65
86.5711	30.9183	0	129.857	61.8365	74.2038	1267.65	1632.48
per mmm2									Average
pictures									native	110922			panned	6052023
native	110922			panned	6052023				GFP	CD36	ICAM1	EPCR	GFP	CD36	ICAM1	EPCR
GFP	CD36	ICAM1	EPCR	GFP	CD36	ICAM1	EPCR		13.7333	13.1333	7.76667	8.83333	6.16667	18.7333	78	173.333
43.2856	142.224	61.8365	55.6529	12.3673	136.04	371.019	1397.51
24.7346	160.775	0	55.6529	12.3673	80.3875	395.754	1218.18		per mm2
30.9183	117.489	61.8365	37.1019	18.551	154.591	315.366	970.833		84.9221	81.212	48.0264	54.6223	38.1325	115.84	482.325	1071.83
55.6529	24.7346	12.3673	43.2856	0	105.122	340.101	878.079
68.0202	61.8365	18.551	43.2856	12.3673	179.326	358.652	853.344
43.2856	49.4692	37.1019	37.1019	18.551	111.306	513.243	840.977
37.1019	129.857	37.1019	74.2038	18.551	129.857	383.386	624.549
55.6529	253.53	6.18365	12.3673	24.7346	154.591	581.263	1119.24
55.6529	43.2856	37.1019	55.6529	24.7346	49.4692	593.631	1007.94
43.2856	49.4692	142.224	49.4692	30.9183	123.673	568.896	1063.59
123.673	37.1019	61.8365	37.1019	61.8365	117.489	408.121	1199.63
49.4692	68.0202	12.3673	43.2856	49.4692	154.591	451.407	1181.08
49.4692	49.4692	0	55.6529	61.8365	117.489	618.365	1236.73
49.4692	80.3875	12.3673	49.4692	43.2856	98.9384	581.263	1378.95
86.5711	80.3875	30.9183	74.2038	30.9183	117.489	525.61	1378.95
30.9183	55.6529	24.7346	61.8365	12.3673	61.8365	333.917	878.079
142.224	80.3875	61.8365	24.7346	12.3673	80.3875	408.121	939.915
68.0202	61.8365	30.9183	92.7548	43.2856	92.7548	346.284	1137.79
74.2038	86.5711	80.3875	86.5711	30.9183	92.7548	278.264	1422.24
111.306	105.122	105.122	43.2856	74.2038	117.489	296.815	1372.77
61.8365	37.1019	24.7346	43.2856	49.4692	98.9384	698.753	1323.3
111.306	68.0202	105.122	49.4692	49.4692	123.673	847.16	921.364
105.122	105.122	61.8365	80.3875	43.2856	117.489	871.895	816.242
117.489	74.2038	24.7346	68.0202	43.2856	68.0202	735.855	785.324
49.4692	74.2038	68.0202	49.4692	37.1019	111.306	457.59	834.793
123.673	55.6529	68.0202	49.4692	98.9384	173.142	432.856	896.629
129.857	98.9384	49.4692	80.3875	74.2038	129.857	674.018	952.282
265.897	49.4692	80.3875	49.4692	30.9183	148.408	439.039	1156.34
86.5711	61.8365	37.1019	68.0202	68.0202	148.408	296.815	1131.61
253.53	74.2038	86.5711	68.0202	55.6529	80.3875	346.284	1236.73
per mmm2									Average
pictures									native	11112022			panned	24052023
native	11112022			panned	24052023				GFP	CD36	ICAM1	EPCR	GFP	CD36	ICAM1	EPCR
GFP	CD36	ICAM1	EPCR	GFP	CD36	ICAM1	EPCR		7.63333	14.9	7.9	10.6	7.55172	11.9333	166.733	364.7
18.551	166.959	12.3673	80.3875	30.9183	80.3875	1292.38	2108.63
24.7346	117.489	18.551	24.7346	68.0202	117.489	1422.24	2510.56		per mm2
6.18365	173.142	30.9183	43.2856	68.0202	55.6529	1688.14	2529.11		47.2019	92.1364	48.8508	65.5467	46.6972	73.7916	1031.02	2255.18
37.1019	185.51	30.9183	37.1019	55.6529	80.3875	1286.2	2077.71
37.1019	148.408	24.7346	55.6529	6.18365	86.5711	1607.75	1292.38
43.2856	74.2038	55.6529	80.3875	80.3875	61.8365	1719.06	2145.73
37.1019	185.51	68.0202	43.2856	68.0202	123.673	1576.83	2127.18
37.1019	105.122	43.2856	74.2038	142.224	117.489	1273.83	2448.73
12.3673	111.306	24.7346	55.6529	37.1019	98.9384	1051.22	2473.46
37.1019	49.4692	49.4692	49.4692	61.8365	86.5711	964.65	2547.66
37.1019	55.6529	68.0202	74.2038	12.3673	49.4692	1051.22	2590.95
49.4692	55.6529	37.1019	55.6529	37.1019	55.6529	1360.4	2331.24
55.6529	74.2038	30.9183	61.8365	18.551	61.8365	834.793	3060.91
68.0202	18.551	24.7346	86.5711	49.4692	74.2038	717.304	2974.34
92.7548	80.3875	55.6529	30.9183	24.7346	105.122	816.242	2646.6
61.8365	142.224	18.551	43.2856	43.2856	24.7346	667.834	2683.7
37.1019	43.2856	61.8365	55.6529	61.8365	43.2856	674.018	2801.19
92.7548	61.8365	24.7346	68.0202	43.2856	55.6529	439.039	1150.16
43.2856	37.1019	49.4692	105.122	30.9183	129.857	908.997	2182.83
43.2856	55.6529	74.2038	55.6529	6.18365	86.5711	772.956	1292.38
74.2038	117.489	111.306	74.2038	43.2856	74.2038	735.855	2869.21
55.6529	98.9384	92.7548	61.8365	80.3875	61.8365	482.325	2671.34
61.8365	98.9384	49.4692	92.7548	12.3673	55.6529	1014.12	2788.83
18.551	43.2856	105.122	117.489	12.3673	49.4692	612.181	2139.54
30.9183	74.2038	61.8365	86.5711	43.2856	55.6529	915.18	1997.32
6.18365	68.0202	37.1019	61.8365	55.6529	68.0202	1119.24	2640.42
43.2856	55.6529	74.2038	74.2038	61.8365	55.6529	853.344	1422.24
80.3875	86.5711	49.4692	86.5711	86.5711	86.5711	1125.42	1886.01
74.2038	92.7548	43.2856	80.3875	12.3673	49.4692	840.977	1595.38
98.9384	86.5711	37.1019	49.4692	0	61.8365	1106.87	1669.59
