# Supplementary material for: A system for functional studies of the major virulence factor of malaria parasites
Source: eLife. 2025 Dec 29;13:RP103542. doi: 10.7554/eLife.103542 (PMC12747541; doi:10.7554/eLife.103542)
Supplement: Figure 5—source data 5. [file elife-103542-fig5-data5.xlsx]

## Sheet: Tabelle1
22032022
var1-ha			ptp1-tgd
GFP	CD36	ICAM1	GFP	CD36	ICAM1		var1-ha			ptp1-tgd
43.28	463.773	290.63	24.7346	37.101	6.138		GFP	CD36	ICAM1	GFP	CD36	ICAM1
55.65	661.65	272.08	92.75	12.36	12.36		5.27657	89.5687	44.0162	4.94264	2.60483	2.80525
61.836	803.874	204.06	24.7346	12.36	37.101
55.65	445.222	228.795	43.28	12.36	37.101		per mm2
18.55	531.784	154.591	74.203	6.138	6.138		32.567	552.818	271.668	30.506	16.077	17.314
24.7346	315.366	352.468	37.101	18.55	12.36
37.101	507.05	166.95	49.46	0	24.7346
18.55	575.079	228.795	37.101	18.55	0
37.101	865.711	216.427	18.55	6.138	43.285
37.101	618.365	253.53	0	18.55	0
12.36	340.1	587.446	6.138	6.138	18.55
12.36	797.691	364.835	30.91	6.138	18.55
49.46	278.264	74.293	6.138	24.7346	6.138
12.36	457.59	377.202	6.138	61.836	6.138
12.36	630.732	302.998	6.138	0	30.91
22032022
var1-ha			ptp1-tgd
GFP	CD36	ICAM1	GFP	CD36	ICAM1		var1-ha			ptp1-tgd
24.7346	636.916	463.774	6.18365	0	12.3673		GFP	CD36	ICAM1	GFP	CD36	ICAM1
98.9384	457.59	383.386	0	61.8365	6.18365		4.13333	64.7333	50	2.13333	2.73333	2.13333
6.18365	136.04	234.979	6.18365	12.3673	6.18365
24.7346	18.551	389.57	12.3673	0	0		per mm2
24.7346	686.385	136.04	12.3673	6.18365	6.18365		25.5591	400.288	309.183	13.1918	16.902	13.1918
18.551	228.795	191.693	24.7346	0	24.7346
6.18365	296.815	74.2038	0	43.2856	30.9183
12.3673	661.651	408.121	55.6529	12.3673	0
6.18365	618.365	117.489	24.7346	18.551	0
49.4692	568.896	315.366	12.3673	12.3673	6.18365
12.3673	389.57	247.346	6.18365	68.0202	12.3673
18.551	105.122	253.53	12.3673	0	0
18.551	377.203	476.141	0	18.551	61.8365
12.3673	228.795	593.631	0	0	24.7346
49.4692	593.631	352.468	24.7346	0	6.18365
1042022
var1-ha			ptp1-tgd				var1-ha			ptp1-tgd
GFP	CD36	ICAM1	GFP	CD36	ICAM1		GFP	CD36	ICAM1	GFP	CD36	ICAM1
24.7346	333.917	173.142	12.3673	30.9183	0		4.86667	84.3333	34.5333	0.666667	1.2	2.53333
18.551	315.366	241.162	0	12.3673	74.2038
30.9183	383.386	401.937	6.18365	0	0		per mm2
24.7346	723.487	234.979	18.551	0	6.18365		30.0938	521.488	213.542	4.12243	7.42038	15.6653
30.9183	624.549	216.428	0	6.18365	12.3673
0	507.059	272.081	0	6.18365	6.18365
12.3673	667.834	92.7548	0	24.7346	0
24.7346	383.386	333.917	6.18365	0	0
12.3673	556.529	204.06	0	0	18.551
0	507.059	92.7548	0	0	24.7346
43.2856	785.324	86.5711	0	0	18.551
12.3673	544.161	148.408	0	6.18365	0
61.8365	742.038	179.326	0	0	37.1019
98.9384	575.08	408.121	6.18365	0	0
55.6529	173.142	117.489	12.3673	24.7346	37.1019
