# Supplementary material for: A system for functional studies of the major virulence factor of malaria parasites
Source: eLife. 2025 Dec 29;13:RP103542. doi: 10.7554/eLife.103542 (PMC12747541; doi:10.7554/eLife.103542)
Supplement: Figure 6—source data 5. [file elife-103542-fig6-data5.xlsx]

## Sheet: Tabelle1
2021-09-23
var1-HA			ID1			ID2			ID3				Average
GFP	CD36	ICAM1	GFP	CD36	ICAM1	GFP	CD36	ICAM1	GFP	CD36	ICAM1		var1-HA			ID1			ID2			ID3
68.0202	902.813	1224.36	18.551	1106.87	692.569	68.0202	1725.24	964.65	0	234.979	123.673		GFP	CD36	ICAM1	GFP	CD36	ICAM1	GFP	CD36	ICAM1	GFP	CD36	ICAM1
12.3673	1007.94	742.038	0	1137.79	939.915	30.9183	2028.24	1125.42	18.551	68.0202	123.673		5	149.867	105.2	8.06667	171.467	136.867	6.86667	221.667	141.267	1	46.6	31.4
6.18365	1119.24	500.876	0	1051.22	624.549	68.0202	1663.4	1001.75	6.18365	204.06	513.243
37.1019	921.364	599.814	30.9183	964.65	1119.24	160.775	1774.71	562.712	0	160.775	222.611		per mm2
30.9183	884.262	371.019	6.18365	1360.4	1545.91	12.3673	2263.22	964.65	0	154.591	142.224		30.9183	926.723	650.52	49.8815	1060.29	846.336	42.4611	1370.71	873.544	6.18365	288.158	194.167
6.18365	636.916	445.223	24.7346	1156.34	871.895	12.3673	1453.16	822.426	6.18365	204.06	129.857
24.7346	896.629	704.936	30.9183	896.629	822.426	98.9384	766.773	525.61	0	346.284	191.693
18.551	1082.14	760.589	86.5711	1960.22	840.977	12.3673	488.508	661.651	6.18365	414.305	234.979
24.7346	661.651	395.754	24.7346	129.857	371.019	37.1019	803.875	476.141	12.3673	401.937	154.591
12.3673	964.65	649.283	0	228.795	970.833	0	1162.53	983.201	0	680.202	136.04
24.7346	1113.06	742.038	80.3875	2374.52	593.631	0	1069.77	692.569	6.18365	401.937	191.693
68.0202	865.711	828.609	265.897	1329.49	933.731	30.9183	766.773	1230.55	0	278.264	105.122
49.4692	902.813	451.407	49.4692	760.589	859.528	6.18365	1224.36	568.896	6.18365	364.835	92.7548
30.9183	853.344	525.61	98.9384	983.201	878.079	55.6529	939.915	1416.06	18.551	68.0202	420.488
49.4692	1088.32	816.242	30.9183	463.774	630.732	43.2856	2430.18	1106.87	12.3673	340.101	129.857
var1-HA			ID1			ID2			ID3
GFP	CD36	ICAM1	GFP	CD36	ICAM1	GFP	CD36	ICAM1	GFP	CD36	ICAM1		var1-HA			ID1			ID2			ID3
0	1020.3	1193.44	105.122	1014.12	1199.63	18.551	952.282	1904.56	18.551	160.775	197.877		GFP	CD36	ICAM1	GFP	CD36	ICAM1	GFP	CD36	ICAM1	GFP	CD36	ICAM1
0	1199.63	1960.22	68.0202	1045.04	884.262	30.9183	649.283	1199.63	6.18365	154.591	68.0202		1.26667	142.933	148.733	5.8	129.333	129.733	6.53333	135.133	220.067	2.33333	25.8	24.5333
30.9183	1310.93	2052.97	37.1019	1106.87	605.998	24.7346	766.773	754.405	49.4692	74.2038	142.224
0	1051.22	513.243	37.1019	915.18	766.773	0	612.181	1026.49	0	105.122	166.959		per mm2
0	915.18	451.407	18.551	983.201	1391.32	0	772.956	2028.24	6.18365	105.122	117.489		7.83263	883.85	919.715	35.8652	799.752	802.226	40.3999	835.617	1360.82	14.4285	159.538	151.706
12.3673	1143.98	748.222	24.7346	933.731	946.099	61.8365	1162.53	1471.71	18.551	92.7548	68.0202
37.1019	939.915	1218.18	98.9384	451.407	742.038	74.2038	1143.98	228.795	6.18365	222.611	154.591
6.18365	1150.16	377.203	43.2856	488.508	772.956	49.4692	1075.96	296.815	6.18365	346.284	105.122
0	748.222	426.672	37.1019	772.956	1212	18.551	1113.06	822.426	0	86.5711	136.04
18.551	692.569	296.815	0	1601.57	1341.85	166.959	760.589	1242.91	6.18365	179.326	204.06
0	704.936	519.427	24.7346	241.162	451.407	6.18365	698.753	2665.15	30.9183	185.51	179.326
0	674.018	649.283	12.3673	247.346	426.672	43.2856	847.16	1508.81	18.551	395.754	86.5711
0	593.631	680.202	18.551	729.671	222.611	74.2038	958.466	2287.95	0	86.5711	439.039
0	723.487	1409.87	12.3673	927.548	173.142	30.9183	395.754	2096.26	30.9183	49.4692	154.591
12.3673	389.57	1298.57	0	537.978	896.629	6.18365	624.549	878.079	18.551	148.408	55.6529
var1-HA			ID1			ID2			ID3
GFP	CD36	ICAM1	GFP	CD36	ICAM1	GFP	CD36	ICAM1	GFP	CD36	ICAM1		var1-HA			ID1			ID2			ID3
74.2038	1273.83	698.753	284.448	1793.26	2040.6	18.551	1459.34	1354.22	12.3673	1026.49	908.997		GFP	CD36	ICAM1	GFP	CD36	ICAM1	GFP	CD36	ICAM1	GFP	CD36	ICAM1
234.979	1409.87	655.467	98.9384	2071.52	772.956	43.2856	791.507	803.875	0	810.058	692.569		11.0667	212.2	105.267	14.5333	274.4	152.733	10.1333	202.467	125.733	2.93333	113.267	115.6
43.2856	1267.65	643.1	117.489	2133.36	939.915	61.8365	1514.99	1063.59	0	593.631	1106.87
18.551	1465.53	426.672	216.428	2312.69	729.671	111.306	1471.71	408.121	0	1131.61	1020.3		per mm2
24.7346	1119.24	1280.02	123.673	2065.34	612.181	30.9183	1409.87	587.447	24.7346	525.61	772.956		68.4324	1312.17	650.932	89.8691	1696.79	944.45	62.661	1251.98	777.491	18.1387	700.402	714.83
80.3875	1230.55	946.099	18.551	828.609	556.529	68.0202	927.548	1181.08	92.7548	772.956	605.998
92.7548	1323.3	1545.91	0	1620.12	828.609	24.7346	1230.55	1242.91	30.9183	643.1	575.08
166.959	1440.79	643.1	6.18365	1583.01	878.079	228.795	1304.75	840.977	0	970.833	420.488
0	1490.26	439.039	6.18365	1644.85	1514.99	30.9183	1317.12	1119.24	0	1100.69	395.754
24.7346	1372.77	389.57	0	2009.69	853.344	30.9183	1113.06	717.304	12.3673	1323.3	1607.75
204.06	1428.42	111.306	259.713	1731.42	605.998	55.6529	426.672	445.223	6.18365	377.203	698.753
12.3673	1267.65	296.815	61.8365	1657.22	927.548	61.8365	1453.16	389.57	18.551	346.284	649.283
12.3673	1094.51	494.692	105.122	1589.2	599.814	117.489	1558.28	451.407	49.4692	253.53	797.691
24.7346	1335.67	791.507	12.3673	859.528	1521.18	24.7346	1440.79	525.61	0	340.101	309.183
12.3673	1162.53	401.937	37.1019	1552.1	785.324	30.9183	1360.4	531.794	24.7346	290.632	160.775
