# Supplementary material for: A system for functional studies of the major virulence factor of malaria parasites
Source: eLife. 2025 Dec 29;13:RP103542. doi: 10.7554/eLife.103542 (PMC12747541; doi:10.7554/eLife.103542)
Supplement: Figure 7—figure supplement 2—source data 1. [file elife-103542-fig7-figsupp2-data1.xlsx]

## Sheet: Tabelle1
	Scoring of EMPIC3- and TryThrA-TGDs in the Var01 IT4 line episomally expressing SBP1-mcherry
	EMPIC3-TGD				TryThra-TGD
type of phenotype	soluble pool	aggregate			soluble pool	aggregate
	4/31cells	2/31cells			28/37cells	10/37cells
with phenotype	4	2			28	10
total	31	31			37	37
percent	0.129032	0.0645161			0.756757	0.27027
