# Supplementary material for: A system for functional studies of the major virulence factor of malaria parasites
Source: eLife. 2025 Dec 29;13:RP103542. doi: 10.7554/eLife.103542 (PMC12747541; doi:10.7554/eLife.103542)
Supplement: Figure 7—source data 1. [file elife-103542-fig7-data1.xlsx]

## Sheet: Binding Assay Interactors 
per mm²
ID1			C1			C6			C9			C10			C17
GFP	CD36	ICAM	GFP	CD36	ICAM	GFP	CD36	ICAM	GFP	CD36	ICAM	GFP	CD36	ICAM	GFP	CD36	ICAM		ID1= var01 control		3052023
24.7346	1341.85	1106.87	0	117.489	457.59	43.2856	742.038	1075.96	43.2856	12.3673	272.081	0	1156.34	772.956	18.551	55.6529	30.9183				Average
61.8365	1719.06	698.753	6.18365	166.959	290.632	12.3673	513.243	1323.3	24.7346	129.857	327.734	43.2856	1298.57	643.1	30.9183	12.3673	18.551		C1 = TryThra		ID1			C1			C6			C9			C10			C17
61.8365	1094.51	408.121	49.4692	111.306	352.468	12.3673	921.364	1391.32	30.9183	259.713	222.611	61.8365	1372.77	692.569	18.551	6.18365	18.551				GFP	CD36	ICAM	GFP	CD36	ICAM	GFP	CD36	ICAM	GFP	CD36	ICAM	GFP	CD36	ICAM	GFP	CD36	ICAM
6.18365	958.466	1156.34	6.18365	80.3875	278.264	12.3673	742.038	105.122	0	272.081	210.244	55.6529	711.12	290.632	18.551	92.7548	18.551		C6 = PTEF		4	182.2	164.533	3.06667	30.6667	28.6	4.33333	116.933	158.267	3.93333	36.0667	43.6667	4.33333	189.333	144.533	2.26667	6.4	3.93333
6.18365	340.101	1131.61	12.3673	92.7548	278.264	12.3673	1273.83	346.284	30.9183	173.142	420.488	61.8365	995.568	1947.85	0	55.6529	24.7346				per mm²
6.18365	1131.61	599.814	0	241.162	228.795	12.3673	1069.77	1583.01	18.551	408.121	630.732	12.3673	927.548	1836.54	6.18365	68.0202	55.6529		C9 = Empic3		ID1			C1			C6			C9			C10			C17
12.3673	1317.12	395.754	0	346.284	61.8365	6.18365	698.753	1181.08	49.4692	432.856	395.754	30.9183	834.793	1335.67	12.3673	105.122	24.7346				GFP	CD36	ICAM	GFP	CD36	ICAM	GFP	CD36	ICAM	GFP	CD36	ICAM	GFP	CD36	ICAM	GFP	CD36	ICAM
12.3673	1446.97	1218.18	0	302.999	49.4692	37.1019	247.346	1372.77	24.7346	117.489	408.121	18.551	785.324	698.753	6.18365	37.1019	12.3673		C10 = PeMP2		24.7346	1126.66	1017.42	18.9632	189.632	176.852	26.7958	723.075	978.666	24.3224	223.024	270.019	26.7958	1170.77	893.744	14.0163	39.5754	24.3224
43.2856	1137.79	636.916	18.551	296.815	12.3673	24.7346	12.3673	1162.53	18.551	111.306	98.9384	6.18365	1249.1	327.734	68.0202	49.4692	30.9183
43.2856	1094.51	439.039	30.9183	340.101	414.305	24.7346	939.915	766.773	18.551	86.5711	24.7346	12.3673	1069.77	389.57	12.3673	55.6529	18.551		C17 = PTP7
49.4692	680.202	1088.32	12.3673	117.489	43.2856	55.6529	760.589	1125.42	24.7346	61.8365	24.7346	0	2164.28	915.18	0	12.3673	30.9183
12.3673	797.691	921.364	30.9183	105.122	55.6529	55.6529	735.855	1372.77	18.551	340.101	216.428	37.1019	1502.63	581.263	0	6.18365	12.3673
6.18365	1205.81	1706.69	37.1019	228.795	86.5711	55.6529	228.795	593.631	30.9183	364.835	346.284	6.18365	1434.61	1317.12	6.18365	12.3673	6.18365
0	1323.3	2300.32	55.6529	197.877	43.2856	24.7346	1007.94	160.775	12.3673	222.611	278.264	6.18365	853.344	1038.85	0	6.18365	37.1019
24.7346	1310.93	1453.16	24.7346	98.9384	0	12.3673	952.282	1119.24	18.551	352.468	173.142	49.4692	1205.81	618.365	12.3673	18.551	24.7346
per mm²
ID1			C1			C6			C9			C10			C17				ID1= var01 control
GFP	CD36	ICAM	GFP	CD36	ICAM	GFP	CD36	ICAM	GFP	CD36	ICAM	GFP	CD36	ICAM	GFP	CD36	ICAM				5082023
0	2108.63	1558.28	0	24.7346	210.244	0	1446.97	636.916	24.7346	105.122	290.632	49.4692	2621.87	1094.51	12.3673	18.551	74.2038		C1 = TryThra		ID1			C1			C6			C9			C10			C17
6.18365	1626.3	1292.38	0	0	43.2856	6.18365	2213.75	828.609	49.4692	74.2038	259.713	12.3673	2417.81	575.08	12.3673	49.4692	24.7346				GFP	CD36	ICAM	GFP	CD36	ICAM	GFP	CD36	ICAM	GFP	CD36	ICAM	GFP	CD36	ICAM	GFP	CD36	ICAM
61.8365	1644.85	1032.67	0	111.306	173.142	0	1181.08	556.529	6.18365	30.9183	420.488	30.9183	1193.44	228.795	43.2856	12.3673	12.3673		C6 = PTEF		2.6	219.267	146.267	0.933333	16.4667	24	3.53333	268.067	162.067	2.06667	38.4667	57.1333	5.66667	260.133	188.6	2.6	5.93333	5.06667
18.551	1137.79	884.262	6.18365	111.306	117.489	0	1681.95	977.017	12.3673	197.877	154.591	68.0202	1249.1	284.448	30.9183	86.5711	37.1019				per mm²
49.4692	735.855	970.833	6.18365	166.959	49.4692	0	847.16	1236.73	18.551	74.2038	117.489	61.8365	711.12	525.61	30.9183	68.0202	12.3673		C9 = Empic3		ID1			C1			C6			C9			C10			C17
30.9183	1811.81	908.997	0	105.122	136.04	86.5711	1032.67	890.446	6.18365	346.284	568.896	18.551	1762.34	2090.07	0	18.551	37.1019				GFP	CD36	ICAM	GFP	CD36	ICAM	GFP	CD36	ICAM	GFP	CD36	ICAM	GFP	CD36	ICAM	GFP	CD36	ICAM
12.3673	1310.93	711.12	12.3673	0	92.7548	18.551	1848.91	1378.95	6.18365	587.447	463.774	12.3673	1638.67	1477.89	6.18365	61.8365	30.9183		C10 = PeMP2		16.0775	1355.87	904.462	5.77141	101.824	148.408	21.8489	1657.63	1002.16	12.7795	237.864	353.293	35.0407	1608.57	1166.24	16.0775	36.6897	31.3305
18.551	1385.14	927.548	24.7346	0	80.3875	0	1947.85	933.731	0	241.162	278.264	18.551	1632.48	1991.14	0	43.2856	68.0202
0	1607.75	871.895	6.18365	0	191.693	30.9183	1855.1	1094.51	6.18365	327.734	371.019	24.7346	1706.69	1731.42	0	12.3673	12.3673		C17 = PTP7
6.18365	1106.87	191.693	12.3673	6.18365	61.8365	30.9183	1855.1	735.855	6.18365	179.326	618.365	6.18365	1113.06	2176.65	18.551	6.18365	55.6529
12.3673	1075.96	902.813	0	259.713	160.775	123.673	1218.18	871.895	6.18365	74.2038	408.121	6.18365	1502.63	544.161	12.3673	24.7346	30.9183
6.18365	1385.14	797.691	6.18365	191.693	420.488	18.551	2151.91	1966.4	12.3673	346.284	661.651	49.4692	1477.89	1113.06	37.1019	43.2856	24.7346
6.18365	1508.81	803.875	6.18365	197.877	216.428	6.18365	2151.91	1212	12.3673	364.835	340.101	37.1019	1564.46	1731.42	24.7346	55.6529	6.18365
6.18365	1273.83	921.364	6.18365	222.611	129.857	6.18365	1440.79	1181.08	6.18365	309.183	24.7346	6.18365	1409.87	649.283	0	24.7346	18.551
6.18365	618.365	791.507	0	129.857	142.224	0	1991.14	531.794	18.551	309.183	321.55	123.673	2127.18	1280.02	12.3673	24.7346	24.7346
per mm²
ID1			C1			C6			C9			C10			C17						12092023
GFP	CD36	ICAM	GFP	CD36	ICAM	GFP	CD36	ICAM	GFP	CD36	ICAM	GFP	CD36	ICAM	GFP	CD36	ICAM		ID1= var01 control		ID1			C1			C6			C9			C10			C17
43.2856	408.121	1063.59	12.3673	37.1019	377.203	12.3673	612.181	742.038	0	80.3875	278.264	30.9183	1428.42	921.364	6.18365	6.18365	18.551				GFP	CD36	ICAM	GFP	CD36	ICAM	GFP	CD36	ICAM	GFP	CD36	ICAM	GFP	CD36	ICAM	GFP	CD36	ICAM
12.3673	290.632	1966.4	0	74.2038	191.693	12.3673	414.305	587.447	0	49.4692	383.386	49.4692	1378.95	1075.96	0	43.2856	68.0202		C1 = TryThra		1.8	84.0667	177.6	1.46667	5.13333	18.8	2.6	79.2	151.733	2.33333	9.73333	30.6667	3.73333	187.733	168.6	1.53333	3	3.46667
6.18365	439.039	939.915	12.3673	68.0202	98.9384	6.18365	550.345	785.324	6.18365	24.7346	432.856	18.551	1187.26	970.833	0	49.4692	12.3673				per mm²
0	748.222	878.079	12.3673	74.2038	154.591	12.3673	482.325	878.079	18.551	6.18365	204.06	6.18365	1100.69	1280.02	12.3673	18.551	43.2856		C6 = PTEF		ID1			C1			C6			C9			C10			C17
24.7346	482.325	859.528	0	61.8365	234.979	12.3673	451.407	1428.42	12.3673	12.3673	228.795	24.7346	946.099	1143.98	6.18365	6.18365	18.551				GFP	CD36	ICAM	GFP	CD36	ICAM	GFP	CD36	ICAM	GFP	CD36	ICAM	GFP	CD36	ICAM	GFP	CD36	ICAM
12.3673	463.774	426.672	18.551	0	191.693	18.551	513.243	803.875	18.551	30.9183	160.775	0	1218.18	129.857	6.18365	30.9183	18.551		C9 = Empic3		11.1306	519.839	1098.22	9.06935	31.7427	116.253	16.0775	489.745	938.266	14.4285	60.1875	189.632	23.0856	1160.88	1042.56	9.4816	18.551	21.4367
6.18365	779.14	933.731	6.18365	18.551	30.9183	6.18365	667.834	865.711	6.18365	74.2038	142.224	24.7346	1156.34	1199.63	24.7346	12.3673	24.7346
0	649.283	1255.28	6.18365	0	68.0202	12.3673	748.222	995.568	12.3673	74.2038	197.877	24.7346	1001.75	1236.73	0	12.3673	24.7346		C10 = PeMP2
6.18365	704.936	1595.38	6.18365	43.2856	98.9384	0	680.202	1143.98	6.18365	12.3673	98.9384	12.3673	667.834	878.079	6.18365	43.2856	12.3673
6.18365	599.814	1558.28	0	30.9183	92.7548	24.7346	562.712	859.528	18.551	24.7346	98.9384	18.551	1020.3	1131.61	18.551	12.3673	30.9183		C17 = PTP7
0	383.386	1069.77	18.551	12.3673	18.551	0	426.672	766.773	18.551	37.1019	154.591	6.18365	1354.22	1075.96	24.7346	6.18365	12.3673
18.551	383.386	1088.32	18.551	12.3673	117.489	12.3673	284.448	989.384	24.7346	92.7548	86.5711	0	1045.04	748.222	0	6.18365	6.18365
24.7346	445.223	1372.77	0	12.3673	55.6529	24.7346	284.448	958.466	24.7346	68.0202	98.9384	12.3673	1484.08	1484.08	6.18365	12.3673	12.3673
6.18365	507.059	723.487	18.551	30.9183	6.18365	61.8365	302.999	977.017	18.551	136.04	197.877	86.5711	1397.51	1242.91	18.551	0	6.18365
0	513.243	742.038	6.18365	0	6.18365	24.7346	364.835	1292.38	30.9183	179.326	80.3875	30.9183	1026.49	1119.24	12.3673	18.551	12.3673
