# Supplementary material for: A system for functional studies of the major virulence factor of malaria parasites
Source: eLife. 2025 Dec 29;13:RP103542. doi: 10.7554/eLife.103542 (PMC12747541; doi:10.7554/eLife.103542)
Supplement: Source data 1. [file elife-103542-data1.xlsx]

## Sheet: IT4 var genes tpm
var-names	IT4-SLI-var66-170622.bam	IT4-SLI-var04_230520.bam	var01_3.bam	var16_3.bam	unpanned_IT4-SLI-var19-K2-01.bam	unpanned_IT4-SLI-var19-K2-02.bam	unpanned_IT4-SLI-var19-K2-03.bam	unpanned_IT4-SLI-var19-K2-04.bam	panned-5x_IT4-SLI-var19-K2-P5_230531.bam	panned-5x_IT4-SLI-var19-K2-P5_230604.bam	panned_5x-IT4-SLI-var19-K2_P5_230614.bam	panned_5x-IT4-SLI-var19-K2_P5_231121.bam	IT4_BioID-Pos1.bam	IT4_BioID-Pos2.bam	IT4_BioID-Pos3.bam	IT4_1.bam
IT4-var01	0.0580663	0.00986668	1473.64	0.01259	0.0304602	0.016822	0.0345934	0.0411355	0.0416589	0	0.0282968	0	298.291	275.687	170.583	0.0450981
IT4-var02	0.0234757	0.015956	0.0681319	0.0101801	0.0656789	0.0816116	0.0559432	0.0415768	0.0673693	0.116498	0.0152535	0.142481	0	0.0170178	0	0.0510517
IT4-var03	0.076701	0	0.111302	0.0831521	0.0536473	0.0444409	0	0	0.0366854	0	0.124593	0.23276	0.786555	0.472611	1.0523	0.214456
IT4-var04	0.248698	134.988	0.68379	0.312185	0.123594	0.136513	0.166359	0.111274	0.0563447	0.086608	0.110564	0.178747	0.124864	0.0189772	0.0552551	0.154524
IT4-var05	0.061	0.0276405	0.132777	0.0529044	0.0711092	0.0235625	0.0323033	0.0432138	0.0486263	0.0269078	0.0264235	0.123409	0	0	0	0.189506
IT4-var06	0	0.0350751	0.0842455	0.0167836	0.243637	0.119601	0.020496	0.191931	0.246822	0.239018	0.184419	0.342569	0.0861488	0.112227	0.0181537	0.0240479
IT4-var07	0.0459501	0.0156158	0	0	0.0401739	0.0133119	0	0.0325521	0.0274719	0.0304037	0.0373206	0.0697212	0	0	0	0
IT4-var08	0.0120988	0.0740104	0.0614488	0.0209863	0.0465429	0.0280405	0.182602	0.0685687	0.115735	0.0240162	0.102197	0.0917891	0.0346245	0.0350822	0.0170246	0.0977261
IT4-var09	0.0561797	0.0190922	0.0407616	0.0243619	0.0294705	0.0162754	0.122721	0.039799	0.0134351	0.0371723	0.0730065	0.0213107	0	0.0203626	0.059289	0.0261797
IT4-var10	0.0393195	0.0267248	0.256757	0.102304	0.144382	0.136691	0.156166	0.292476	0.141046	0.104066	0.102193	0.164066	0.0750166	0.0855093	0.0553275	0.189336
IT4-var11	0.0333626	0.022676	0.0726194	0.0434023	0.0816723	0.0579913	0.0795039	0.059087	0.0398926	0.0220749	0.0433552	0.0379663	0.0477386	0	0	0.0414585
IT4-var12	0.0650516	0	0.0943974	0.00705228	0.113748	0.141342	0.0775098	0.11521	0.077784	0.0645638	0.116237	0.135718	0.0620551	0.0235783	0.022884	0.0404186
IT4-var13	0.0454875	0	0.0165019	0.0394506	0.0397694	0.0922448	0.0180663	0.0966732	0.0543907	0.0300976	0.0369449	0.0949014	0	0.0164872	0.0160017	0.0282628
IT4-var14	0.0481955	0.55688	0.227296	0.104498	0.0674192	0.111699	0.583827	0.170714	0.195938	0.119585	0.383614	0.246807	0	0.314436	0.322131	0.0935793
IT4-var15	0.0318744	0.173316	0.0462534	0.158954	0.0668821	0.110809	0.0759575	0.0903222	0.0838488	0.0632708	0.0724873	0.0725456	0.0152031	0.0693182	0.0224256	0.158437
IT4-var16	0.0989495	0.0480388	0.102562	409.736	0.103813	0.0573318	0.134743	0.230323	0.0946534	0.0374124	0.110217	0.0428967	0	0.0204942	0.0397813	0.0526976
IT4-var17	0.0272907	0.0556472	0.079204	0.0118344	0.0190881	0.0316247	0.0216782	0.0966669	0.084844	0.0812583	0.0709296	0.0207044	0.032542	0.029675	0	0.0763047
IT4-var18	0.0709983	0.0321709	0.214639	0.0513132	0.0786263	0.109698	0.150392	0.0670625	0.0792351	0.0313182	0.176838	0.143636	0.152388	0.0343116	0.0749277	0.128664
IT4-var19	0.0940921	0.0319764	0.0682692	0.0204012	358.897	360.278	145.577	312.413	305.399	305.133	226.047	298.126	0.0560986	0.0341041	0.0165499	0.0146156
IT4-var20	0.0539299	0.0641467	0.0782586	0.00584658	0.0518656	0.124989	0.0642582	0.0382052	0.0451399	0.0178419	0.0175207	0.0613718	0.0128614	0	0.0379431	0.0921481
IT4-var21	0.233686	0.0397082	0.113035	0.0928917	0.163448	0.0789827	0.123751	0.0827744	0.0558851	0.0386557	0.101226	0.118192	0.130038	0.0423504	0.0822066	5.85022
IT4-var22	0	0	0.0353211	0	0.00425617	0.0141031	0.0580044	0.0172435	0.0116419	0	0.0158155	0.0553989	0.0116097	0	0	0.0226854
IT4-var23	0.231243	0.314344	0.265652	0.116989	0.141522	0.044661	0.0306143	0.0819089	0.0460839	0.025501	0.025042	0.0292391	0.0183826	0.0419076	0.0677891	9.00385
IT4-var24	0	0	0.0290838	0	0.0140183	0.0464505	0.031841	0.0283969	0.0766887	0	0.0260454	0.0608214	0	0	0	0.0498118
IT4-var25	0.0824829	0.0280311	0.179538	0.160957	0.137017	0.0716865	0.0655197	0.116866	0.0986272	0.177373	0.160782	0.0938649	0.0196709	0.134534	0.058032	0.153748
IT4-var26	0.0597849	0	0.0578365	0	0.104539	0.0461862	0.0949793	0.169412	0.12391	0.0791155	0.0388457	0.0907129	0.0190103	0.0288924	0.112167	0.0495283
IT4-var27	0.0801542	0.0181598	0.261704	0.0405513	0.0840939	0.0928834	0.0636698	0.0757108	0.0575056	0.035357	0.0260404	0.0405399	0.038231	0	0.0469946	1.10395
IT4-var28	0.198492	0.0539647	0.57607	0.0430373	0.222132	0.0920058	0.299574	0.140616	0.189874	0.0788015	0.128972	0.0903529	0.123077	0.0863334	0.0279304	0.320657
IT4-var29	0.0597849	0	0.0578365	0.0432088	0.104539	0.0461862	0.0633195	0.084706	0.0190631	0.0527437	0.0258972	0.0907129	0	0	0.0280416	0.0619104
IT4-var30	0.251343	0.105128	0.14028	0.0503045	0.114945	0.044809	0.0921473	0.219147	0.101721	0.051171	0.0502499	0.058672	0.0461087	0.0140155	0	1.70583
IT4-var31	0.0415104	0.0282139	0.0903546	0.0360013	0.0435507	0.0601283	0.0329735	0.161738	0	0.0549322	0	0.0314923	0.00989957	0	0.0292052	0.0257917
IT4-var32A	0.0319909	0	0	0.0208089	1.11878	0.648748	0.419293	0.985844	1.05577	1.01603	1.28875	1.52902	0.0152586	0.0231905	0.0225076	0.019877
IT4-var33	0.0419581	0.0285182	0.121772	0.045487	0.117388	0.0729321	0.149981	0.0297241	0.0401364	0.0832869	0.0545252	0.127328	0.0800506	0.0304158	0.0738004	0.0651747
IT4-var34	6.21689	0.930146	5.21995	1.28861	3.65778	2.03892	1.22682	1.9251	1.34648	1.43585	1.06703	1.86881	0.484885	0.354299	0.921561	83.5047
IT4-var35	8.62356	21.8014	33.2085	10.6437	12.616	11.3267	11.7201	11.0686	10.243	9.68536	13.0949	15.684	7.51804	9.22702	10.1344	19.9265
IT4-var36	0.126101	0	0.0914935	0.0729103	0.176399	0.0730634	0.233724	0.178666	0.100522	0.0556246	0.0546234	0.0956678	0.0801948	0	0	0.124055
IT4-var39	0.0815227	0.0554096	0.177448	0	0.0997847	0.0708519	0.194271	0.0577526	0.0779832	0.053941	0.026485	0.15462	0.0291628	0.0590966	0.0716955	0.183616
IT4-var40	0	0	0	0	0	0	0	0	0	0	0	0	0	0	0	0
IT4-var44	0.128022	0	0.116109	0.0208184	0.190279	0.0556324	0.07627	0.136041	0.137772	0.021177	0.0727855	0.072844	0.0610624	0.0464022	0.0225179	0.134231
IT4-var45	0.0397435	0.0675325	0.259526	0.0947896	0.104242	0.230276	0.205205	0.0563104	0.133063	0.0657425	0.245325	0.0301518	0.0947819	0.0432157	0.0838862	0.111123
IT4-var46	0.0759798	0.0172141	0.0367518	0	0.0664286	0.132069	0.251475	0	0.0969079	0.0418945	0.139877	0.0288214	0.01208	0.036719	0.0178189	0.0393406
IT4-var47	0.118692	0.0537818	0.172235	0.0428914	0.0691808	0.137541	0.141423	0.0560559	0.0378461	0.0523563	0.0642674	0.0900467	0.028306	0	0.0278357	0.215095
IT4-var51	0.259775	0.100894	0.107704	0.0321856	0.142761	0.0645064	0.176872	0.131451	0.0266246	0.024555	0.0723391	0.056309	0	0.040353	0.0391647	1.31431
IT4-var54	0.0389911	0	0.0848709	0	0.0818152	0.158141	0.0619446	0.0552444	0.0745964	0.154795	0.228013	0.0443715	0.0185975	0.028265	0	0.0908491
IT4-var60	0	0	0.0219384	0.0131119	0	0	0.0240182	0	0.0144619	0	0	0	0	0.0219188	0	0
IT4-var61	0.0831193	0.0141237	0.0301539	0	0.0436024	0	0	0.0294418	0.0596329	0	0	0.0315297	0	0.030127	0	0
IT4-var62	0.163045	0.110819	0.50277	0.0883793	0.128295	0.0944693	0.0485677	0.115505	0.0584874	0.148338	0.0529701	0.0773101	0.145814	0.0147742	0.0286782	2.50098
IT4-var63	0	0.0916332	0.363323	0.484404	0.0808251	0.0892729	0.214182	0.0545759	0.156599	0.0764609	0.100113	0.0876692	0.0275587	0.027923	0.0271007	0.370965
IT4-var64	0	0	0.131234	0.0130724	0.0210848	0.00873322	0.0239459	0.0427116	0.043255	0.059839	0.0391746	0.0571756	0.00718922	0	0	0.0936519
IT4-var65	0.538391	0.16404	0.350224	0.104659	0.253211	0.0645406	0.0884829	0.105216	0.142073	0.0859881	0.0965033	0.0281694	0.0442751	0	0.0522472	3.12026
IT4-var66	859.118	8.29832	12.4856	5.60531	310.987	18.0139	7.73641	14.0532	2.44821	2.54343	1.19059	0.151102	0.0284993	3.0031	3.58729	447.37
IT4-var67	0.140407	0.0835033	0.0254684	0.0304432	0.245514	0.21355	0.348535	0.136768	0.142705	0.0232257	0.2965	0.119837	0.0585985	0.127228	0.0493926	0.921466
IT4-var68	0.135977	0.0462106	0.0493295	0.0294827	0.178325	0.196964	0.162018	0	0	0.202436	0.066264	0.10316	0.0324283	0	0.0478341	0.823745

## Sheet: IT4 var genes tpm (percent)
var-names	IT4-SLI-var66-170622.bam	IT4-SLI-var04_230520.bam	var01_3.bam	var16_3.bam	unpanned_IT4-SLI-var19-K2-01.bam	unpanned_IT4-SLI-var19-K2-02.bam	unpanned_IT4-SLI-var19-K2-03.bam	unpanned_IT4-SLI-var19-K2-04.bam	panned-5x_IT4-SLI-var19-K2-P5_230531.bam	panned-5x_IT4-SLI-var19-K2-P5_230604.bam	panned_5x-IT4-SLI-var19-K2_P5_230614.bam	panned_5x-IT4-SLI-var19-K2_P5_231121.bam	IT4_BioID-Pos1.bam	IT4_BioID-Pos2.bam	IT4_BioID-Pos3.bam	IT4_1.bam
IT4-var01	0.00661053	0.00585045	96.2256	0.00292772	0.00440252	0.00424731	0.0201108	0.0119359	0.0128511	0	0.0114688	0	96.5468	94.9161	90.71	0.0077622
IT4-var02	0.00267258	0.00946114	0.00444887	0.0023673	0.00949279	0.0206058	0.0325224	0.012064	0.0207823	0.0361024	0.0061823	0.044311	0	0.00585903	0	0.00878692
IT4-var03	0.00873199	0	0.00726779	0.0193364	0.00775383	0.0112207	0	0	0.0113168	0	0.0504978	0.0723875	0.254582	0.162715	0.559574	0.0369117
IT4-var04	0.0283129	80.0413	0.04465	0.0725964	0.0178635	0.0344675	0.0967121	0.0322872	0.0173814	0.0268395	0.0448118	0.0555895	0.0404144	0.00653364	0.0293827	0.0265963
IT4-var05	0.00694452	0.0163894	0.00867007	0.0123025	0.0102777	0.00594919	0.0187794	0.012539	0.0150004	0.00833863	0.0107095	0.0383797	0	0	0	0.0326175
IT4-var06	0	0.0207978	0.00550105	0.0039029	0.0352136	0.0301975	0.0119153	0.0556907	0.0761405	0.0740706	0.0747457	0.106538	0.0278835	0.0386385	0.00965349	0.00413908
IT4-var07	0.00523117	0.00925937	0	0	0.00580647	0.00336106	0	0.00944536	0.00847463	0.009422	0.0151261	0.021683	0	0	0	0
IT4-var08	0.00137738	0.0438844	0.00401248	0.0048802	0.006727	0.00707983	0.106155	0.019896	0.0357024	0.00744253	0.0414208	0.028546	0.0112068	0.0120784	0.00905306	0.0168204
IT4-var09	0.00639575	0.0113207	0.00266165	0.00566518	0.00425948	0.00410931	0.0713436	0.0115481	0.00414451	0.0115196	0.0295897	0.00662754	0	0.00701063	0.0315278	0.004506
IT4-var10	0.00447631	0.0158465	0.0167657	0.02379	0.0208681	0.0345127	0.0907864	0.084865	0.0435104	0.0322496	0.041419	0.0510238	0.0242804	0.0294399	0.0294212	0.0325882
IT4-var11	0.00379814	0.0134457	0.00474189	0.0100929	0.0118044	0.014642	0.0462193	0.0171447	0.0123062	0.00684094	0.017572	0.0118074	0.0154514	0	0	0.00713575
IT4-var12	0.00740576	0	0.00616395	0.00163996	0.0164404	0.0356869	0.0450601	0.0334295	0.0239951	0.0200081	0.047111	0.0422078	0.0200852	0.00811774	0.0121689	0.00695677
IT4-var13	0.0051785	0	0.00107754	0.00917395	0.00574801	0.0232905	0.0105028	0.0280508	0.0167786	0.00932713	0.0149739	0.029514	0	0.00567635	0.00850911	0.00486455
IT4-var14	0.00548679	0.330202	0.0148419	0.0243002	0.00974432	0.0282024	0.339406	0.0495345	0.0604434	0.037059	0.15548	0.076756	0	0.108257	0.171298	0.0161067
IT4-var15	0.00362872	0.102768	0.00302025	0.0369636	0.0096667	0.0279777	0.0441576	0.026208	0.0258659	0.0196074	0.0293793	0.0225614	0.00492073	0.0238655	0.0119252	0.0272698
IT4-var16	0.0112649	0.0284846	0.0066971	95.281	0.0150045	0.0144755	0.0783321	0.0668306	0.029199	0.011594	0.0446713	0.0133407	0	0.00705591	0.0211543	0.00907021
IT4-var17	0.0031069	0.032996	0.00517186	0.00275201	0.00275887	0.00798481	0.0126025	0.028049	0.0261729	0.0251816	0.0287479	0.00643899	0.0105328	0.0102168	0	0.0131334
IT4-var18	0.00808277	0.0190758	0.0140155	0.0119325	0.0113641	0.0276972	0.0874298	0.0194589	0.0244427	0.00970539	0.0716731	0.0446704	0.0493229	0.0118131	0.0398439	0.0221455
IT4-var19	0.0107119	0.0189604	0.00445784	0.00474414	51.8727	90.9652	84.6309	90.65	94.2104	94.5594	91.6174	92.7161	0.0181573	0.0117417	0.00880066	0.00251561
IT4-var20	0.00613963	0.0380358	0.00511012	0.00135958	0.00749632	0.031558	0.0373563	0.0110857	0.0139249	0.00552912	0.00710119	0.0190864	0.00416282	0	0.0201768	0.0158603
IT4-var21	0.0266039	0.023545	0.00738097	0.0216013	0.0236237	0.019942	0.0719424	0.0240179	0.0172396	0.0119792	0.0410274	0.0367574	0.0420889	0.0145808	0.0437145	1.00693
IT4-var22	0	0	0.00230639	0	0.000615159	0.00356083	0.0337207	0.00500338	0.00359134	0	0.00641008	0.0172288	0.00375768	0	0	0.00390457
IT4-var23	0.0263257	0.18639	0.0173465	0.027205	0.0204546	0.0112763	0.0177975	0.0237667	0.0142161	0.00790265	0.0101496	0.00909326	0.00594983	0.0144283	0.0360478	1.54973
IT4-var24	0	0	0.00189911	0	0.00202612	0.0117281	0.0185107	0.00823968	0.0236572	0	0.0105563	0.0189152	0	0	0	0.00857352
IT4-var25	0.00939023	0.0166211	0.0117235	0.0374292	0.0198035	0.0180998	0.0380896	0.0339098	0.0304248	0.0549672	0.0651654	0.0291916	0.00636681	0.0463184	0.0308593	0.0264628
IT4-var26	0.00680618	0	0.0037766	0	0.0151094	0.0116614	0.0552159	0.0491567	0.0382241	0.0245176	0.0157443	0.0282113	0.00615301	0.00994735	0.0596461	0.00852472
IT4-var27	0.00912511	0.0107679	0.0170887	0.0094299	0.0121544	0.0234518	0.0370142	0.0219683	0.0177395	0.010957	0.0105543	0.0126077	0.0123741	0	0.02499	0.19001
IT4-var28	0.0225972	0.0319984	0.0376162	0.010008	0.0321054	0.0232302	0.174156	0.0408014	0.058573	0.0244203	0.0522727	0.0280994	0.0398359	0.0297236	0.0148524	0.0551908
IT4-var29	0.00680618	0	0.0037766	0.0100479	0.0151094	0.0116614	0.0368106	0.0245784	0.00588063	0.016345	0.0104962	0.0282113	0	0	0.0149115	0.0106559
IT4-var30	0.028614	0.0623359	0.00915998	0.0116979	0.0166134	0.0113136	0.0535695	0.063588	0.0313791	0.0158577	0.0203664	0.0182468	0.0149239	0.00482537	0	0.293604
IT4-var31	0.00472573	0.0167294	0.00589996	0.00837184	0.00629453	0.0151815	0.019169	0.04693	0	0.0170233	0	0.00979398	0.00320416	0	0.0155303	0.00443922
IT4-var32A	0.00364198	0	0	0.00483896	0.1617	0.1638	0.243755	0.286053	0.325686	0.314864	0.522335	0.47552	0.00493871	0.00798424	0.0119687	0.00342118
IT4-var33	0.00477669	0.0169099	0.00795146	0.0105777	0.0169664	0.0184143	0.0871908	0.00862476	0.0123814	0.0258103	0.0220992	0.0395984	0.0259097	0.0104718	0.0392444	0.0112177
IT4-var34	0.707759	0.55153	0.340852	0.299657	0.528671	0.514799	0.713208	0.558589	0.415368	0.444964	0.432471	0.581192	0.156941	0.121981	0.490053	14.3727
IT4-var35	0.981745	12.9272	2.16844	2.47511	1.82343	2.85983	6.81344	3.21167	3.15978	3.00145	5.30739	4.87765	2.43334	3.17676	5.38913	3.4297
IT4-var36	0.0143559	0	0.00597433	0.0169547	0.0254955	0.0184475	0.135874	0.0518417	0.0310092	0.0172378	0.022139	0.0297523	0.0259564	0	0	0.0213521
IT4-var39	0.00928091	0.0328552	0.011587	0	0.0144222	0.0178891	0.112939	0.0167575	0.0240565	0.0167161	0.0107345	0.0480863	0.00943904	0.0203463	0.0381251	0.0316036
IT4-var40	0	0	0	0	0	0	0	0	0	0	0	0	0	0	0	0
IT4-var44	0.0145746	0	0.00758169	0.00484117	0.0275016	0.0140464	0.0443393	0.0394736	0.0425002	0.00656267	0.0295001	0.0226542	0.0197639	0.0159758	0.0119742	0.0231035
IT4-var45	0.00452458	0.0400434	0.0169465	0.0220426	0.0150665	0.0581414	0.119295	0.0163391	0.0410476	0.0203733	0.0994308	0.0093771	0.0306778	0.0148787	0.0446077	0.0191262
IT4-var46	0.00864988	0.0102071	0.00239982	0	0.00960115	0.0333456	0.146194	0	0.0298945	0.0129829	0.0566927	0.00896335	0.00390989	0.0126419	0.00947543	0.00677122
IT4-var47	0.0135124	0.0318899	0.0112466	0.00997408	0.00999894	0.0347271	0.0822155	0.0162652	0.0116749	0.016225	0.0260477	0.0280041	0.00916173	0	0.014802	0.0370217
IT4-var51	0.029574	0.0598253	0.00703285	0.00748453	0.0206337	0.016287	0.102824	0.0381418	0.00821325	0.0076095	0.0293192	0.0175119	0	0.0138931	0.0208264	0.226217
IT4-var54	0.00443892	0	0.00554189	0	0.011825	0.0399285	0.0360113	0.0160298	0.0230117	0.0479703	0.0924143	0.0137994	0.0060194	0.00973134	0	0.0156368
IT4-var60	0	0	0.00143253	0.00304907	0	0	0.0139629	0	0.00446126	0	0	0	0	0.00754641	0	0
IT4-var61	0.00946267	0.00837465	0.00196899	0	0.006302	0	0	0.00854286	0.0183957	0	0	0.00980561	0	0.0103724	0	0
IT4-var62	0.0185618	0.0657103	0.0328298	0.020552	0.0185428	0.0238522	0.0282347	0.0335151	0.0180424	0.0459693	0.0214689	0.0240431	0.0471952	0.00508658	0.01525	0.430463
IT4-var63	0	0.0543339	0.0237243	0.112645	0.0116819	0.0225402	0.124514	0.0158358	0.0483082	0.0236949	0.040576	0.0272648	0.00891984	0.00961358	0.0144112	0.0638498
IT4-var64	0	0	0.0085693	0.00303988	0.00304746	0.00220502	0.0139208	0.0123932	0.0133434	0.0185439	0.0158776	0.0177814	0.00232691	0	0	0.0161192
IT4-var65	0.0612929	0.0972676	0.0228689	0.0243376	0.0365974	0.0162956	0.0514392	0.0305296	0.0438272	0.0266474	0.039113	0.00876058	0.0143304	0	0.0277832	0.537054
IT4-var66	97.8058	4.92049	0.815282	1.30347	44.948	4.54826	4.49754	4.07769	0.755231	0.7882	0.48255	0.0469922	0.00922427	1.03394	1.90759	77.0005
IT4-var67	0.0159846	0.0495133	0.00166303	0.00707935	0.035485	0.0539185	0.20262	0.0396847	0.0440222	0.00719756	0.120172	0.0372687	0.0189664	0.0438032	0.0262652	0.158601
IT4-var68	0.0154802	0.0274006	0.00322111	0.00685597	0.025774	0.0497306	0.0941887	0	0	0.062734	0.026857	0.0320824	0.010496	0	0.0254365	0.141781

## Sheet: IT4 var genes reads
var-names	pf-names	IT4-SLI-var66-170622.bam	IT4-SLI-var04_230520.bam	var01_3.bam	var16_3.bam	unpanned_IT4-SLI-var19-K2-01.bam	unpanned_IT4-SLI-var19-K2-02.bam	unpanned_IT4-SLI-var19-K2-03.bam	unpanned_IT4-SLI-var19-K2-04.bam	panned-5x_IT4-SLI-var19-K2-P5_230531.bam	panned-5x_IT4-SLI-var19-K2-P5_230604.bam	panned_5x-IT4-SLI-var19-K2_P5_230614.bam	panned_5x-IT4-SLI-var19-K2_P5_231121.bam	IT4_BioID-Pos1.bam	IT4_BioID-Pos2.bam	IT4_BioID-Pos3.bam	IT4_1.bam
IT4-var01	PfIT_060021400	4	1	139912	2	6	2	3	4	6	0	3	0	43081	26198	16702	10
IT4-var02	PfIT_090005100	2	2	8	2	16	12	6	5	12	15	2	16	0	2	0	14
IT4-var03	PfIT_140006400	2	0	4	5	4	2	0	0	2	0	5	8	43	17	39	18
IT4-var04	PfIT_120006100	19	15173	72	55	27	18	16	12	9	10	13	18	20	2	6	38
IT4-var05	PfIT_120045600	3	2	9	6	10	2	2	3	5	2	2	8	0	0	0	30
IT4-var06	PfIT_020027600	0	4	9	3	54	16	2	21	40	28	22	35	14	12	2	6
IT4-var07	PfIT_060036700	4	2	0	0	10	2	0	4	5	4	5	8	0	0	0	0
IT4-var08	PfIT_070005900	1	9	7	4	11	4	19	8	20	3	13	10	6	4	2	26
IT4-var09	PfIT_130005300	4	2	4	4	6	2	11	4	2	4	8	2	0	2	6	6
IT4-var10	PfIT_040017300	2	2	18	12	21	12	10	21	15	8	8	11	8	6	4	31
IT4-var11	PfIT_050005500	2	2	6	6	14	6	6	5	5	2	4	3	6	0	0	8
IT4-var12	PfIT_130077800	4	0	8	1	20	15	6	10	10	6	11	11	8	2	2	8
IT4-var13	PfIT_140085700	4	0	2	8	10	14	2	12	10	4	5	11	0	2	2	8
IT4-var14	PfIT_130005200	4	68	26	20	16	16	61	20	34	15	49	27	0	36	38	25
IT4-var15	PfIT_070016900	2	16	4	23	12	12	6	8	11	6	7	6	2	6	2	32
IT4-var16	PfIT_120024500	7	5	10	66843	21	7	12	23	14	4	12	4	0	2	4	12
IT4-var17	PfIT_020005200	2	6	8	2	4	4	2	10	13	9	8	2	5	3	0	18
IT4-var18	PfIT_030029700	6	4	25	10	19	16	16	8	14	4	23	16	27	4	9	35
IT4-var19	PfIT_010005000	8	4	8	4	87255	52868	15582	37495	54289	39209	29579	33411	10	4	2	4
IT4-var20	PfIT_070017000	4	7	8	1	11	16	6	4	7	2	2	6	2	0	4	22
IT4-var21	PfIT_040017400	12	3	8	11	24	7	8	6	6	3	8	8	14	3	6	967
IT4-var22	PfIT_100044000	0	0	4	0	1	2	6	2	2	0	2	6	2	0	0	6
IT4-var23	PfIT_040017000	12	24	19	14	21	4	2	6	5	2	2	2	2	3	5	1504
IT4-var24	PfIT_040030600	0	0	2	0	2	4	2	2	8	0	2	4	0	0	0	8
IT4-var25	PfIT_050038500	4	2	12	18	19	6	4	8	10	13	12	6	2	9	4	24
IT4-var26	PfIT_120060400	3	0	4	0	15	4	6	12	13	6	3	6	2	2	8	8
IT4-var27	PfIT_070016700	6	2	27	7	18	12	6	8	9	4	3	4	6	0	5	266
IT4-var28	PfIT_070017200	10	4	40	5	32	8	19	10	20	6	10	6	13	6	2	52
IT4-var29	PfIT_140006100	3	0	4	5	15	4	4	6	2	4	2	6	0	0	2	10
IT4-var30	PfIT_040025800	13	8	10	6	17	4	6	16	11	4	4	4	5	1	0	284
IT4-var31	PfIT_140006200	2	2	6	4	6	5	2	11	0	4	0	2	1	0	2	4
IT4-var32A	PfIT_060036800	2	0	0	3	200	70	33	87	138	96	124	126	2	2	2	4
IT4-var33	PfIT_040005400	2	2	8	5	16	6	9	2	4	6	4	8	8	2	5	10
IT4-var34	PfIT_080014100	318	70	368	152	535	180	79	139	144	111	84	126	52	25	67	13749
IT4-var35	PfIT_050037800	813	3024	4315	2314	3401	1843	1391	1473	2019	1380	1900	1949	1486	1200	1358	6047
IT4-var36	PfIT_000009500	6	0	6	8	24	6	14	12	10	4	4	6	8	0	0	19
IT4-var39	PfIT_120045200	4	4	12	0	14	6	12	4	8	4	2	10	3	4	5	29
IT4-var40	PfIT_030005100	0	0	0	0	0	0	0	0	0	0	0	0	0	0	0	0
IT4-var44	PfIT_070005800	8	0	10	3	34	6	6	12	18	2	7	6	8	4	2	27
IT4-var45	PfIT_120005500	2	5	18	11	15	20	13	4	14	5	19	2	10	3	6	18
IT4-var46	PfIT_030029800	6	2	4	0	15	18	25	0	16	5	17	3	2	4	2	10
IT4-var47	PfIT_120046200	6	4	12	5	10	12	9	4	4	4	5	6	3	0	2	35
IT4-var51	PfIT_120045800	14	8	8	4	22	6	12	10	3	2	6	4	0	3	3	228
IT4-var54	PfIT_110005600	2	0	6	0	12	14	4	4	8	12	18	3	2	2	0	15
IT4-var60	PfIT_120060300	0	0	2	2	0	0	2	0	2	0	0	0	0	2	0	0
IT4-var61	PfIT_080037400	4	1	2	0	6	0	0	2	6	0	0	2	0	2	0	0
IT4-var62	PfIT_040025100	8	8	34	10	18	8	3	8	6	11	4	5	15	1	2	395
IT4-var63	PfIT_120024600	0	7	26	58	12	8	14	4	17	6	8	6	3	2	2	62
IT4-var64	PfIT_070017100	0	0	12	2	4	1	2	4	6	6	4	5	1	0	0	20
IT4-var65	PfIT_080013800	29	13	26	13	39	6	6	8	16	7	8	2	5	0	4	541
IT4-var66	PfIT_040025500	43135	613	864	649	44648	1561	489	996	257	193	92	10	3	208	256	72302
IT4-var67	PfIT_120045700	8	7	2	4	40	21	25	11	17	2	26	9	7	10	4	169
IT4-var68	PfIT_040025300	4	2	2	2	15	10	6	0	0	9	3	4	2	0	2	78

## Sheet: 3D7 var genes tpm
var-names	pf-names	SLI-3D7var0809100-HA.bam	SLI-3D7var0425800-HA_1.bam	SLI-3D7var0425800-HA_2.bam	SLI-3D7var0425800-HA_3.bam	SLI-3D7MEEDvar0425800-HA_1.bam	SLI-3D7MEEDvar0425800-HA_2.bam	SLI-3D7MEEDvar0425800-HA_3.bam	SLI-3D7var2csa-HA.bam
MAL6P1.1	PF3D7_0632800	0.14214	1.59468	0	0	33.9908	22.3095	11.8012	0.232696
MAL6P1.252	PF3D7_0617400	0.152454	0.262018	0.162813	0.0776366	1.74726	1.13398	1.05422	0.199664
MAL6P1.314	PF3D7_0600400	0	0	0	0	0	0	0	0.0795038
MAL6P1.316	PF3D7_0600200	0.201795	0	0	0	0	0	0	0.264285
MAL6P1.4	PF3D7_0632500	0.361098	12.2743	0	0	245.326	196.855	103.625	0.283752
MAL7P1.212	PF3D7_0833500	0.0344386	0.657651	0	0	13.0174	11.1003	6.29825	0.0451033
MAL7P1.50	PF3D7_0712300	0.0698783	0.467046	0.159914	0	12.2055	18.8106	10.6814	0.183035
MAL7P1.55	PF3D7_0712800	0.0354947	0.474472	0.0270761	0	3.71597	3.30019	1.421	0.0464863
MAL7P1.56	PF3D7_0712900	0.210458	0.334915	0.133785	0.0595417	5.14105	3.97568	2.71276	0.137816
MAL8P1.220	PF3D7_0700100	0	0.0648363	0	0.0288168	1.27213	1.71368	0.46338	0.0444663
PF07_0048	PF3D7_0711700	0.249882	0.477182	0.326769	0.0302979	6.76628	8.31341	6.78829	0.374014
PF07_0049	PF3D7_0712000	0.102694	0.751743	0.0261123	0.116214	13.0145	7.54758	6.47832	0.224158
PF07_0050	PF3D7_0712400	0.113716	0.434313	0.0578303	0.032172	9.73291	11.5129	4.48356	0.0496437
PF07_0051	PF3D7_0712600	0.0708285	0.270513	0.0810443	0	5.26862	4.42164	3.22222	0.139143
PF07_0139	PF3D7_0733000	0.0886612	0.959425	0.0225442	0	17.0659	10.18	7.77119	0.116117
PF08_0103	PF3D7_0809100	479.676	1.78473	4.16996	2.09533	2.83717	1.96745	1.02684	0.138567
PF08_0106	PF3D7_0808700	0.104876	0.567445	0.906687	0.32638	2.92788	4.58146	4.5485	0.0915687
PF08_0107	PF3D7_0808600	0.0915915	0.262359	0.163025	0.0777377	1.81682	2.40608	1.83339	0.119955
PF08_0140	PF3D7_0800300	0.0226444	0.324319	0.0345473	0.0384386	6.014	2.62675	2.28698	0.0889701
PF08_0141	PF3D7_0800200	0.116514	0.178	0.0355519	0.0593345	4.51968	2.00156	1.78101	0.274672
PF08_0142	PF3D7_0800100	0.0374737	0.286244	0	0	5.6163	4.74514	1.43203	0
PF10_0001	PF3D7_1000100	0.173532	0.397658	0.820718	1.79686	5.2398	8.57432	5.65249	0.363631
PF10_0406	PF3D7_1041300	0.0350567	0.167364	0.026742	0	2.97473	3.01113	1.59485	0.0918255
PF11_0007	PF3D7_1100100	0.0705885	0.67399	0	0	6.06755	5.00047	2.76172	0.0462238
PF11_0008	PF3D7_1100200	0	1.92597	0	0	49.5192	41.2535	37.0598	0
PF11_0521	PF3D7_1150400	0.0459942	0.592866	0.0877135	0.0585559	12.4434	17.3093	11.2782	0.0903559
PF13_0001	PF3D7_1300100	0	0.103795	0	0	1.71707	4.33166	1.64847	0
PF13_0003	PF3D7_1300300	0.0790383	0.339602	0	0	7.31647	6.98132	3.32604	0.129393
PF13_0364	PF3D7_1373500	0	0.268082	0	0	4.061	4.44408	2.74622	0.0459643
PF3D7_1240900	PF3D7_1240900	0.187175	4.25944	0.190375	0.238296	106.022	95.5785	59.7485	0.245138
PFA0005w	PF3D7_0100100	0	0	0.0544615	0	0	0	0	0.140255
PFA0015c	PF3D7_0100300	0.411676	0	0	0.0582345	0	0	0	0.26958
PFA0765c	PF3D7_0115700	0.0353342	0.236163	0	0	4.32218	3.7233	2.02541	0.0462761
PFB0010w	PF3D7_0200100	0.147885	0.894286	0	0	15.8082	19.2936	8.79097	0.129121
PFB1055c	PF3D7_0223500	0.0707083	1.58656	0.0809068	0.0600132	12.1167	11.865	6.88385	0.0926045
PFC0005w	PF3D7_0300100	0.0352544	0.0336615	0.0537857	0	0	0	0	0.138515
PFC1120c	PF3D7_0324900	0.0717636	0.479647	0.0547429	0.0913633	4.42871	4.92485	2.7424	0.0469933
PFD0005w	PF3D7_0400100	0.0570572	0.245156	0.674629	1.42859	2.54654	2.62724	1.55743	0
PFD0020c	PF3D7_0400400	0.0205883	0.196581	0.0314105	0.0174742	3.38059	1.93247	1.7796	0.0269639
PFD0615c	PF3D7_0412400	0.429314	1.75678	0.608197	0.208216	25.2775	16.3196	11.5512	0.240969
PFD0625c	PF3D7_0412700	0.115307	0.275243	0.131938	0.122333	4.35213	3.80338	2.36057	0.0377536
PFD0630c	PF3D7_0412900	0	0	0	0	0.0374564	0.0601946	0.0309256	0
PFD0635c	PF3D7_0413100	0.0337324	0.0322082	0	0	0.557601	0.477919	0.583147	0
PFD0995c	PF3D7_0420700	0	0.208435	0	0.0308799	1.32312	2.38406	1.35725	0.0476498
PFD1000c	PF3D7_0420900	0	0.0335103	0	0	0.580143	0.683704	0.542857	0
PFD1005c	PF3D7_0421100	0	0.135564	0	0.0301259	1.87754	1.38294	1.09804	0.0464863
PFD1015c	PF3D7_0421300	0.176871	0.675516	0.0539684	0.0900707	11.8507	10.0862	6.43715	0
PFD1235w	PF3D7_0425800	0.0397243	289.192	486.265	149.748	1191.95	994.646	861.83	0.0780385
PFD1245c	PF3D7_0426000	0.0740155	0.0706712	0.197612	0.251281	2.6101	3.44088	1.78462	0.048468
PFE0005w	PF3D7_0500100	0	0	0	0	0	0	0	0
PFE1640w**	PF3D7_0533100	3.4561	0.0377136	0	0	0.261165	0.96183	0.59298	0.620758
PFI0005w	PF3D7_0900100	0.0343818	0.0656566	0.0262272	0.0291813	1.36401	1.55269	0.594374	0.135086
PFI1820w	PF3D7_0937600	0.0691439	0.528158	3.05918	0.880282	4.41944	1.89803	1.50988	0.362223
PFI1830c	PF3D7_0937800	0.243621	1.72798	1.67255	2.54033	8.74452	6.84157	3.86326	0.546965
PFL0005w	PF3D7_1200100	0.110826	0.317457	0.140901	0	5.45522	6.90226	2.11758	0.145146
PFL0020w	PF3D7_1200400	0.127252	0.0972017	0.0194141	0.0432017	0.869443	0.585942	0.208408	0.0999948
PFL0030c/MAL12P1.6	PF3D7_1200600	2.54791	0.773211	0.979335	0.335275	11.2966	12.645	18.618	1067.12
PFL0935c	PF3D7_1219300	0.103373	0.197404	0.0525701	0.116983	6.34142	4.33272	2.69626	0.180512
PFL1950w	PF3D7_1240300	0	0.518735	0.043624	0	9.92586	9.52022	6.66024	0
PFL1955w	PF3D7_1240400	0.198397	0.0631443	0.0756709	0.0280647	2.6965	5.06544	2.9785	0.562976
PFL1960w	PF3D7_1240600	0.261395	0.811149	0.224323	0.0277322	26.4295	62.6112	46.9426	0.427927
PFL2665c	PF3D7_1255200	0.137	0.228917	0.0261266	0	4.79345	3.15413	1.80745	0.179424

## Sheet: 3D7 var genes tpm (percent)
var-names	SLI-3D7var0809100-HA.bam	SLI-3D7var0425800-HA_1.bam	SLI-3D7var0425800-HA_2.bam	SLI-3D7var0425800-HA_3.bam	SLI-3D7var0425800-HA_Average.bam	SLI-3D7MEEDvar0425800-HA_1.bam	SLI-3D7MEEDvar0425800-HA_2.bam	SLI-3D7MEEDvar0425800-HA_3.bam	SLI-3D7MEEDvar0425800-HA_Average.bam	SLI-3D7var2csa-HA.bam
MAL6P1.1	0.0289207	0.479497	0	0	0.159832	1.74047	1.31255	0.903982	1.319	0.0216277
MAL6P1.252	0.0310192	0.0787848	0.0324355	0.0481696	0.05313	0.0894667	0.0667161	0.0807538	0.0789788	0.0185577
MAL6P1.314	0	0	0	0	0	0	0	0	0	0.00738942
MAL6P1.316	0.0410585	0	0	0	0	0	0	0	0	0.0245638
MAL6P1.4	0.0734712	3.69068	0	0	1.23023	12.5617	11.5817	7.93775	10.6937	0.0263731
MAL7P1.212	0.00700709	0.197746	0	0	0.0659153	0.666545	0.65307	0.48245	0.600688	0.00419209
MAL7P1.50	0.0142179	0.140434	0.031858	0	0.0574306	0.624973	1.1067	0.818205	0.849958	0.017012
MAL7P1.55	0.00722196	0.142667	0.00539408	0	0.0493536	0.190273	0.194162	0.108849	0.164428	0.00432064
MAL7P1.56	0.0428211	0.100704	0.0266526	0.0369426	0.0547664	0.263242	0.233904	0.207799	0.234982	0.0128092
MAL8P1.220	0	0.0194953	0	0.0178793	0.0124582	0.0651384	0.100822	0.0354953	0.0671519	0.00413288
PF07_0048	0.0508424	0.143481	0.0650987	0.0187983	0.0757928	0.346461	0.489108	0.519988	0.451852	0.0347625
PF07_0049	0.0208946	0.226038	0.00520207	0.0721048	0.101115	0.666393	0.444052	0.496244	0.535563	0.0208342
PF07_0050	0.0231374	0.130591	0.0115209	0.0199611	0.0540245	0.498365	0.677343	0.343444	0.506384	0.00461409
PF07_0051	0.0144112	0.0813391	0.0161456	0	0.0324949	0.269775	0.260141	0.246825	0.258913	0.0129325
PF07_0139	0.0180395	0.288484	0.00449124	0	0.0976586	0.873842	0.598927	0.595279	0.689349	0.0107924
PF08_0103	97.5977	0.536642	0.830736	1.30004	0.88914	0.145275	0.115752	0.078657	0.113228	0.012879
PF08_0106	0.0213387	0.170622	0.180629	0.202502	0.184585	0.14992	0.269544	0.348419	0.255961	0.00851078
PF08_0107	0.0186358	0.0788874	0.0324778	0.0482323	0.0531992	0.0930288	0.141559	0.140439	0.125009	0.0111491
PF08_0140	0.00460737	0.0975177	0.00688249	0.0238492	0.0427498	0.307941	0.154541	0.175184	0.212555	0.00826926
PF08_0141	0.0237067	0.0535219	0.00708262	0.0368141	0.0324728	0.231426	0.117759	0.136427	0.161871	0.0255292
PF08_0142	0.00762462	0.0860692	0	0	0.0286897	0.287578	0.279174	0.109695	0.225482	0
PF10_0001	0.0353078	0.11957	0.163503	1.11486	0.465978	0.268299	0.504458	0.432984	0.401914	0.0337974
PF10_0406	0.00713285	0.0503237	0.00532753	0	0.0185504	0.152318	0.177156	0.122166	0.150547	0.00853465
PF11_0007	0.0143624	0.202659	0	0	0.0675529	0.310683	0.294196	0.21155	0.272143	0.00429624
PF11_0008	0	0.57911	0	0	0.193037	2.53558	2.42709	2.83881	2.60049	0
PF11_0521	0.00935826	0.178266	0.0174742	0.036331	0.077357	0.637154	1.01837	0.863918	0.839813	0.00839806
PF13_0001	0	0.0312094	0	0	0.0104031	0.0879208	0.254847	0.126274	0.156347	0
PF13_0003	0.0160816	0.102113	0	0	0.0340377	0.374633	0.410736	0.254777	0.346715	0.0120263
PF13_0364	0	0.0806083	0	0	0.0268694	0.20794	0.261461	0.210362	0.226588	0.00427212
PF3D7_1240900	0.0380838	1.28075	0.0379264	0.14785	0.488842	5.42876	5.62323	4.57678	5.20959	0.0227841
PFA0005w	0	0	0.0108498	0	0.00361659	0	0	0	0	0.0130359
PFA0015c	0.083762	0	0	0.0361316	0.0120439	0	0	0	0	0.0250559
PFA0765c	0.0071893	0.0710108	0	0	0.0236703	0.221313	0.219055	0.155148	0.198505	0.0043011
PFB0010w	0.0300896	0.268898	0	0	0.0896328	0.809442	1.13511	0.673395	0.872649	0.012001
PFB1055c	0.0143867	0.477056	0.0161182	0.0372351	0.176803	0.620426	0.698059	0.527308	0.615264	0.00860706
PFC0005w	0.00717308	0.0101215	0.0107151	0	0.00694555	0	0	0	0	0.0128742
PFC1120c	0.0146015	0.144223	0.0109058	0.0566863	0.070605	0.226768	0.289747	0.21007	0.242195	0.00436776
PFD0005w	0.0116092	0.0737147	0.134399	0.88637	0.364828	0.130393	0.15457	0.1193	0.134755	0
PFD0020c	0.00418902	0.0591088	0.00625756	0.0108419	0.0254027	0.1731	0.113694	0.136319	0.141038	0.00250614
PFD0615c	0.0873509	0.528238	0.121164	0.129187	0.25953	1.29431	0.960139	0.884826	1.04643	0.0223966
PFD0625c	0.0234611	0.0827614	0.0262846	0.0759013	0.0616491	0.222847	0.223767	0.180821	0.209145	0.00350898
PFD0630c	0	0	0	0	0	0.00191792	0.00354147	0.00236892	0.00260944	0
PFD0635c	0.00686339	0.00968453	0	0	0.00322818	0.0285514	0.0281177	0.0446695	0.0337795	0
PFD0995c	0	0.0626732	0	0.0191594	0.0272775	0.067749	0.140263	0.103967	0.103993	0.00442878
PFD1000c	0	0.010076	0	0	0.00335868	0.0297057	0.0402248	0.0415832	0.0371712	0
PFD1005c	0	0.0407619	0	0.0186916	0.0198178	0.0961377	0.0813632	0.084111	0.087204	0.00432064
PFD1015c	0.0359872	0.203118	0.0107515	0.0558843	0.0899178	0.606805	0.593409	0.49309	0.564435	0
PFD1235w	0.00808254	86.9558	96.8733	92.9112	92.2468	61.0325	58.5186	66.0168	61.856	0.00725323
PFD1245c	0.0150596	0.0212498	0.0393682	0.155907	0.072175	0.133648	0.202439	0.136703	0.157597	0.00450482
PFE0005w	0	0	0	0	0	0	0	0	0	0
PFE1640w**	0.7032	0.0113399	0	0	0.00377998	0.0133727	0.0565879	0.0454227	0.0384611	0.0576958
PFI0005w	0.00699553	0.0197419	0.00522496	0.0181055	0.0143575	0.0698426	0.0913506	0.0455295	0.0689076	0.0125555
PFI1820w	0.0140684	0.158809	0.609448	0.54617	0.438142	0.226293	0.111668	0.115658	0.151206	0.0336665
PFI1830c	0.0495685	0.519578	0.333205	1.57615	0.809644	0.447755	0.402515	0.295928	0.382066	0.0508372
PFL0005w	0.0225494	0.0954544	0.0280703	0	0.0411749	0.279329	0.406085	0.162208	0.282541	0.0134905
PFL0020w	0.0258914	0.0292271	0.00386766	0.0268044	0.0199664	0.044519	0.0344731	0.0159642	0.0316521	0.00929394
PFL0030c/MAL12P1.6	0.518413	0.232493	0.195102	0.208021	0.211872	0.578431	0.743953	1.42615	0.916177	99.1824
PFL0935c	0.0210329	0.0593564	0.010473	0.0725818	0.0474704	0.324707	0.254909	0.206535	0.26205	0.0167776
PFL1950w	0	0.155976	0.00869074	0	0.0548889	0.508244	0.560109	0.510179	0.526178	0
PFL1955w	0.0403671	0.0189865	0.0150751	0.0174127	0.0171581	0.138072	0.298018	0.228155	0.221415	0.0523253
PFL1960w	0.053185	0.2439	0.0446894	0.0172064	0.101932	1.3533	3.68364	3.59584	2.87759	0.0397733
PFL2665c	0.0278748	0.0688318	0.00520492	0	0.0246789	0.245444	0.185569	0.138452	0.189822	0.0166765

## Sheet: 3D7var genes reads
var-names	pf-names	SLI-3D7var0809100-HA.bam	SLI-3D7var0425800-HA_1.bam	SLI-3D7var0425800-HA_2.bam	SLI-3D7var0425800-HA_3.bam	SLI-3D7MEEDvar0425800-HA_1.bam	SLI-3D7MEEDvar0425800-HA_2.bam	SLI-3D7MEEDvar0425800-HA_3.bam	SLI-3D7var2csa-HA.bam
MAL6P1.1	PF3D7_0632800	4	47	0	0	868	709	365	5
MAL6P1.252	PF3D7_0617400	5	9	7	3	52	42	38	5
MAL6P1.314	PF3D7_0600400	0	0	0	0	0	0	0	1
MAL6P1.316	PF3D7_0600200	8	0	0	0	0	0	0	8
MAL6P1.4	PF3D7_0632500	20	712	0	0	12330	12313	6308	12
MAL7P1.212	PF3D7_0833500	1	20	0	0	343	364	201	1
MAL7P1.50	PF3D7_0712300	2	14	6	0	317	608	336	4
MAL7P1.55	PF3D7_0712800	1	14	1	0	95	105	44	1
MAL7P1.56	PF3D7_0712900	6	10	5	2	133	128	85	3
MAL8P1.220	PF3D7_0700100	0	2	0	1	34	57	15	1
PF07_0048	PF3D7_0711700	7	14	12	1	172	263	209	8
PF07_0049	PF3D7_0712000	3	23	1	4	345	249	208	5
PF07_0050	PF3D7_0712400	3	12	2	1	233	343	130	1
PF07_0051	PF3D7_0712600	2	8	3	0	135	141	100	3
PF07_0139	PF3D7_0733000	3	34	1	0	524	389	289	3
PF08_0103	PF3D7_0809100	13601	53	155	70	73	63	32	3
PF08_0106	PF3D7_0808700	3	17	34	11	76	148	143	2
PF08_0107	PF3D7_0808600	3	9	7	3	54	89	66	3
PF08_0140	PF3D7_0800300	1	15	2	2	241	131	111	3
PF08_0141	PF3D7_0800200	5	8	2	3	176	97	84	9
PF08_0142	PF3D7_0800100	1	8	0	0	136	143	42	0
PF10_0001	PF3D7_1000100	5	12	31	61	137	279	179	8
PF10_0406	PF3D7_1041300	1	5	1	0	77	97	50	2
PF11_0007	PF3D7_1100100	2	20	0	0	156	160	86	1
PF11_0008	PF3D7_1100200	0	83	0	0	1849	1917	1676	0
PF11_0521	PF3D7_1150400	2	27	5	3	491	850	539	3
PF13_0001	PF3D7_1300100	0	3	0	0	43	135	50	0
PF13_0003	PF3D7_1300300	4	18	0	0	336	399	185	5
PF13_0364	PF3D7_1373500	0	8	0	0	105	143	86	1
PF3D7_1240900	PF3D7_1240900	6	143	8	9	3084	3460	2105	6
PFA0005w	PF3D7_0100100	0	0	2	0	0	0	0	3
PFA0015c	PF3D7_0100300	6	0	0	1	0	0	0	3
PFA0765c	PF3D7_0115700	1	7	0	0	111	119	63	1
PFB0010w	PF3D7_0200100	3	19	0	0	291	442	196	2
PFB1055c	PF3D7_0223500	2	47	3	2	311	379	214	2
PFC0005w	PF3D7_0300100	1	1	2	0	0	0	0	3
PFC1120c	PF3D7_0324900	2	14	2	3	112	155	84	1
PFD0005w	PF3D7_0400100	2	9	31	59	81	104	60	0
PFD0020c	PF3D7_0400400	1	10	2	1	149	106	95	1
PFD0615c	PF3D7_0412400	14	60	26	8	748	601	414	6
PFD0625c	PF3D7_0412700	4	10	6	5	137	149	90	1
PFD0630c	PF3D7_0412900	0	0	0	0	1	2	1	0
PFD0635c	PF3D7_0413100	1	1	0	0	15	16	19	0
PFD0995c	PF3D7_0420700	0	6	0	1	33	74	41	1
PFD1000c	PF3D7_0420900	0	1	0	0	15	22	17	0
PFD1005c	PF3D7_0421100	0	4	0	1	48	44	34	1
PFD1015c	PF3D7_0421300	5	20	2	3	304	322	200	0
PFD1235w	PF3D7_0425800	2	15249	32094	8883	54456	56553	47689	3
PFD1245c	PF3D7_0426000	2	2	7	8	64	105	53	1
PFE0005w	PF3D7_0500100	0	0	0	0	0	0	0	0
PFE1640w**	PF3D7_0533100	175	2	0	0	12	55	33	24
PFI0005w	PF3D7_0900100	1	2	1	1	36	51	19	3
PFI1820w	PF3D7_0937600	1	8	58	15	58	31	24	4
PFI1830c	PF3D7_0937800	7	52	63	86	228	222	122	12
PFL0005w	PF3D7_1200100	3	9	5	0	134	211	63	3
PFL0020w	PF3D7_1200400	5	4	1	2	31	26	9	3
PFL0030c/MAL12P1.6	PF3D7_1200600	129	41	65	20	519	723	1036	41253
PFL0935c	PF3D7_1219300	3	6	2	4	167	142	86	4
PFL1950w	PF3D7_1240300	0	19	2	0	315	376	256	0
PFL1955w	PF3D7_1240400	6	2	3	1	74	173	99	13
PFL1960w	PF3D7_1240600	8	26	9	1	734	2164	1579	10
PFL2665c	PF3D7_1255200	4	7	1	0	127	104	58	4

## Sheet: 3D7 rif genes tpm
Geneid	SLI-3D70425800(1).bam	SLI-3D70425800(2).bam	SLI-3D70425800(3).bam	SLI-3D7MEEDvar0425800(1).bam	SLI-3D7MEEDvar0425800(2).bam	SLI-3D7MEEDvar0425800(3).bam	SLI-3D70809100.bam	SLI-3D7-var2csa.bam
PF3D7_0100200.1	0	2.64525	0.581259	0	0	0	27.88	30.9358
PF3D7_0100400.1	4.11732	4.24264	6.71231	0	0	0	2.82417	11.9081
PF3D7_0100600.1	0	0	0	0	0	0	0	0
PF3D7_0100800.1	0	0	0	0	0	0	0	0
PF3D7_0100900.1	0	0	0	0	0	0	0	0
PF3D7_0101000.1	0	0	0	0	0	0	0	1.29334
PF3D7_0101600.1	0	0.805533	2.12406	5.27751	18.0674	11.7312	4.46844	2.82617
PF3D7_0101900.1	0	0	0	0	0	0	0	0
PF3D7_0114700.1	0	0	0	0	0	0	0	0
PF3D7_0115200.1	0	0	0	0	0	0	0	1.133
PF3D7_0115300.1	0	0	0	2.19746	0.985148	0	0	0
PF3D7_0115600.1	0.957202	0	0	21.1486	34.9749	25.1928	28.889	19.9326
PF3D7_0200200.1	0	0	0	0	1.40804	1.96914	31.2021	27.7517
PF3D7_0200500.1	0	0	0	0	0	0	0	0
PF3D7_0200600.1	0	0	0	0	0	0	0	0
PF3D7_0200700.1	0	0	0	0	0.942525	0	0	0
PF3D7_0201000.1	0	0	0	0	0	0	0	0
PF3D7_0201200.1	0	0	1.75235	0	0	0	0	0
PF3D7_0222500.1	0	0	0	0	1.06316	1.11512	0	0
PF3D7_0222600.1	1.456	0	0	6.19551	44.8676	18.8242	0	2.24588
PF3D7_0222700.1	0	0.904624	1.19268	0	0	0	1.00362	0
PF3D7_0223100.1	2.67626	0	0	34.1638	116.873	94.9045	0.489522	0
PF3D7_0223200.1	0	0	0	0	0	0	0	0
PF3D7_0223400.1	3.24061	0.445233	2.34802	11.1375	30.4341	26.435	33.5891	21.8691
PF3D7_0300200.1	2.16576	36.5996	32.3652	0	0	0	5.447	2.50552
PF3D7_0300500.1	0	0	0	0	0	0	0	0
PF3D7_0300700.1	0	0.851201	1.12224	0	0	0	0	0
PF3D7_0300800.1	0	0.891935	0	0	0	0	0	0
PF3D7_0324400.1	0	0	2.48301	3.3651	4.02297	1.0549	0	0
PF3D7_0324500.1	0	0	0	0	0	0	0	1.37917
PF3D7_0324800.1	7.23712	43.3524	37.2305	24.6362	45.4531	36.9811	8.82509	9.48879
PF3D7_0400300.1	13.6702	106.251	56.2458	10.0677	30.9496	24.3467	59.386	19.2037
PF3D7_0400500.1	2.0113	0	0	6.91257	8.85425	4.17914	0.919731	0
PF3D7_0400700.1	0	3.14938	1.03805	0	0	7.0562	3.9308	4.97226
PF3D7_0400900.1	0	0	0	1.11684	0	1.05032	0	0
PF3D7_0401000.1	0	0	1.32828	0	0	0	0	0
PF3D7_0401200.1	0	0	0	0	0.458536	1.44284	0	0
PF3D7_0401300.1	0	0	1.07242	0	0	3.1893	0	1.14153
PF3D7_0401400.1	0	0.891935	0	0	0	0	0.989546	0
PF3D7_0401600.1	788.051	416.487	473.828	481.003	404.514	465.504	420.54	439.369
PF3D7_0413200.1	0	0	0	0.997454	0	0	0	0
PF3D7_0413300.1	1.02531	1.69042	0	6.04087	3.15956	2.84055	0.937709	1.18615
PF3D7_0421200.1	0	0	0	4.88181	11.186	3.06071	0	1.27809
PF3D7_0425700.1	435.188	1754.51	723.344	1566.34	1710.94	1064.73	0	0.671279
PF3D7_0425900.1	31.5589	77.4347	126.707	7.65628	8.82617	7.54317	13.2429	3.00669
PF3D7_0500400.1	0	0	0	0.973328	0	1.83072	0	0
PF3D7_0500500.1	0	0	0	0	1.57302	0	0	0
PF3D7_0532900.1	1.10664	0.912258	0	5.97673	3.89736	3.06588	166.489	0
PF3D7_0600300.1	0	0	1.05888	0	0	0	1.78207	9.01688
PF3D7_0600500.1	0	0	1.11872	0	0	0	0.941389	2.38162
PF3D7_0600700.1	0	0	0	1.00603	0	0	0	0
PF3D7_0617700.1	0	0	0	0	0	1.06417	1.05389	1.33312
PF3D7_0631800.1	0	0	0	0	0	0	0	0
PF3D7_0632000.1	0	0	0	0.969663	0	0	0	0
PF3D7_0632100.1	0	0	0	0	0	0	0	0
PF3D7_0632200.1	0	0	0	0	0	0.939504	0	0
PF3D7_0632300.1	0	0	0	0.523035	0.937931	0	1.94855	1.23241
PF3D7_0632400.1	0	0	0	1.41611	7.61829	3.9953	1.31891	2.22447
PF3D7_0632700.1	4.33589	0.397144	0	48.2537	82.7134	61.3964	22.4709	25.6378
PF3D7_0700200.1	0	0	0	0	0	1.03241	0	1.29334
PF3D7_0700300.1	1.61234	0.886087	1.16823	0	0.473194	0	0	0
PF3D7_0700500.1	1.12467	0.463562	0	0	1.98044	1.55792	1.02858	1.30111
PF3D7_0701100.1	2.68723	5.31652	2.92059	13.1938	24.1329	29.2829	66.8479	38.549
PF3D7_0701800.1	0	0	1.25241	1.13156	0	0	0	0
PF3D7_0713000.1	0	0	0	0	0	1.95169	0	0
PF3D7_0732200.1	0	0	0.534601	0	0	0	0	0
PF3D7_0732300.1	0	0	0	0	0	0	0	0
PF3D7_0732400.1	0	0	0	2.09214	0	2.45943	0	1.23241
PF3D7_0732500.1	0	0	0	0.949641	0	0.893083	0	0
PF3D7_0732700.1	0	0	0	1.07758	0	1.01341	0	0
PF3D7_0732900.1	3.14728	0	1.7103	11.3319	22.63	21.7984	9.11491	20.0256
PF3D7_0800400.1	25.198	104.302	55.355	34.2197	58.5321	36.1425	40.2065	28.5307
PF3D7_0800500.1	0	0	0	1.9049	0	0.895726	0	0
PF3D7_0808800.1	47.9644	32.3887	94.8316	0	0.898516	0	41.0665	2.36123
PF3D7_0808900.1	52.8304	31.4533	75.2816	0	0	0	23.6215	0
PF3D7_0832500.1	0	0	0	0	0	0	2.0949	1.32497
PF3D7_0832800.1	0	0	0	0	0	0	0	1.39953
PF3D7_0833000.1	0	0	0	0	0.97188	2.03876	0	0
PF3D7_0833100.1	0	0	0	1.02199	0	0.961128	0	0
PF3D7_0833200.1	0	0	0	0	0	0	0	0
PF3D7_0833400.1	5.83065	0	0	21.3404	32.6684	33.2859	2.90864	2.45285
PF3D7_0900200.1	3.85413	1.19143	1.04721	35.4807	53.4456	49.384	54.1945	39.5714
PF3D7_0900300.1	3.165	0	0	16.5755	35.2973	18.5112	14.473	0
PF3D7_0900400.1	2.20955	0.910721	2.40143	24.9515	40.367	41.3196	6.06232	8.30757
PF3D7_0900500.1	0	0	0	1.13255	0	4.26041	1.05482	5.33717
PF3D7_0900600.1	0.982297	0.809757	0	11.5749	35.027	32.2032	0.449187	2.2728
PF3D7_0900700.1	0.96424	0	0	2.36712	7.21621	4.45228	0	0
PF3D7_0901000.1	0	0	0	0	0	0	0	0
PF3D7_0901100.1	0	0	0	0	0	0	0	0
PF3D7_0901300.1	0	0	0	0	0	0	0.928274	0
PF3D7_0901400.1	0	0	0	0	0.947942	0.99427	0	0
PF3D7_0901500.1	1.47014	0.807942	0	0	0	0.905098	0	0
PF3D7_0937300.1	3.08799	4.66691	3.35615	0	0	0	0	0
PF3D7_0937400.1	1.08288	3.57069	1.17692	0	0.953422	0	0	0
PF3D7_0937500.1	15.5498	27.3461	38.8704	7.63466	5.93269	11.4879	7.58469	5.99641
PF3D7_0937700.1	31.41	88.602	85.3441	19.7591	35.4329	17.6758	13.4655	13.6266
PF3D7_1000200.1	3.89708	3.21256	2.11775	2.39174	3.00229	3.14901	14.2565	21.4151
PF3D7_1000300.1	0	0	1.19668	1.0812	0	0	1.00699	0
PF3D7_1000400.1	0	0	0	0	0	0	0.909962	0
PF3D7_1000500.1	0.491886	1.21646	3.20761	0	0	2.72548	0	0
PF3D7_1000600.1	32.736	17.1969	31.0443	3.78183	12.1506	11.8553	4.98987	1.48516
PF3D7_1040000.1	0	0	0	0	0	1.54205	0	1.28785
PF3D7_1040100.1	1.243	0	0	15.2573	19.6992	20.662	1.13681	0
PF3D7_1040300.1	0.96424	1.19231	0.523988	9.9419	16.9793	8.01411	5.29116	1.11551
PF3D7_1040400.1	0	0	1.1818	1.06776	0.478687	0	0.497235	0
PF3D7_1040500.1	0	0.853217	1.1249	1.01635	0	0	0	1.79608
PF3D7_1040600.1	0	0	0	0	0	1.04488	0	0
PF3D7_1040700.1	0	0	0	0	0	0	0	1.15193
PF3D7_1040800.1	0	0	0	0	0	0	0	0
PF3D7_1040900.1	0	0	0	0	0.520087	0	0	0
PF3D7_1041000.1	0	0	0	0	0.910563	0.955064	0	1.19644
PF3D7_1041100.1	0	0	0	0	5.85098	2.04564	3.03884	0
PF3D7_1041200.1	0	0.801948	0	0	5.13914	3.59353	2.66913	1.12544
PF3D7_1100300.1	7.7925	0	0	139.921	171.523	153.691	2.54527	1.28785
PF3D7_1100400.1	0.54823	0	0	1.07668	0.965379	1.01256	0	0
PF3D7_1100500.1	7.54994	2.87252	0	14.8275	12.272	8.04487	0	0
PF3D7_1101100.1	4.09802	2.53365	0.556737	10.0603	27.5118	8.51499	14.0546	7.70398
PF3D7_1101200.1	0	0	0	0	0.954999	0	0	0
PF3D7_1101300.1	0	0	1.1887	2.14798	0	4.0401	2.00055	0
PF3D7_1149800.1	0	2.8853	4.43805	5.15543	0	5.3871	7.46914	2.69945
PF3D7_1150000.1	0	0	0	0	0	0	0.90311	0
PF3D7_1150200.1	0	0	0	0	0.920729	0	0	0
PF3D7_1150300.1	1.11039	0.915348	0	34.3463	59.1473	29.2245	0	0
PF3D7_1200200.1	0	2.76781	0	0	0	1.77179	21.0563	18.8665
PF3D7_1200300.1	0	0	0	5.43798	2.43791	1.02282	0	0
PF3D7_1200500.1	0	1.40832	2.22811	11.4076	20.7574	15.4612	10.6246	3.55753
PF3D7_1253700.1	0	0	0	0.999777	0	0	0	1.17787
PF3D7_1254000.1	0	0	0	0	0	0	0	0
PF3D7_1254200.1	1.01973	0	1.10828	3.004	10.7738	13.6546	0.932605	0
PF3D7_1254400.1	0	0	0	0.477284	0	0	0	0
PF3D7_1254500.1	0	0	0	0	0	0	0	1.40212
PF3D7_1254700.1	0	1.34568	0	4.27456	2.87451	0	0	1.259
PF3D7_1254800.1	0	0.487388	0	2.90287	1.56167	1.09199	1.08145	0
PF3D7_1255000.1	0	0	0	0	0	0	0	0
PF3D7_1255100.1	0	0	0	2.13197	0.955789	0.50125	1.98565	2.51174
PF3D7_1300200.1	2.05382	0	0	17.1426	44.3031	21.3375	12.6789	10.6921
PF3D7_1300400.1	0	0	0	16.8151	38.908	14.2833	9.09349	11.5028
PF3D7_1300500.1	1.09646	0	0	1.07668	1.93076	4.55652	8.52366	4.43965
PF3D7_1300600.1	0	0	0	0.539695	1.45171	3.55287	1.00531	2.54332
PF3D7_1300700.1	0	0	0	1.95999	0	1.84326	7.30186	0
PF3D7_1372600.1	4.5502	0.375096	0	69.2559	80.5251	85.7211	5.40988	1.0528
PF3D7_1372700.1	0	0	0	2.01362	0.902732	0.94685	0	1.18615
PF3D7_1373000.1	0	0	0	0	0	0	0	0
PF3D7_1373100.1	0	0	0	0	0	0	0	0
PF3D7_1373300.1	0	0	0	0	0	1.96276	0	0
PF3D7_1373400.1	0.960005	0	0	3.77075	20.2857	17.2876	39.9484	22.7675
PF3D7_1400200.1	0	0	2.14162	0	0.867463	0	0	0
PF3D7_1400300.1	0	0	0	0	2.01852	0	0	0
PF3D7_1400400.1	0	0	1.15125	0	0	0	0	0
PF3D7_1400500.1	0	0	1.06362	0	0	0	0	0
PF3D7_1400600.1	0	0	1.0668	0.963857	0.864217	0	0.897702	1.13555
PF3D7_1400800.1	0	0	0	0	0	0	0	0
PF3D7_1479400.1	0	0	0	0	0	0	0.482822	0
PF3D7_1479600.1	0	0	0	0	0	0	0	0
PF3D7_1479700.1	0	0	1.12048	0	0	0	1.88574	0
PF3D7_1479800.1	0	0	0	0	0	0	0	0
PF3D7_1480000.1	0.593916	1.95838	0	0	0	0	0	0

## Sheet: 3D7 rif genes tpm (percent)
Geneid	SLI-3D70425800(1).bam	SLI-3D70425800(2).bam	SLI-3D70425800(3).bam	SLI-3D7MEEDvar0425800(1).bam	SLI-3D7MEEDvar0425800(2).bam	SLI-3D7MEEDvar0425800(3).bam	SLI-3D70809100.bam	SLI-3D7-var2csa.bam
PF3D7_0100200.1	0	0.0945676	0.0306674	0	0	0	2.1293	3.27063
PF3D7_0100400.1	0.261637	0.151674	0.354144	0	0	0	0.215693	1.25896
PF3D7_0100600.1	0	0	0	0	0	0	0	0
PF3D7_0100800.1	0	0	0	0	0	0	0	0
PF3D7_0100900.1	0	0	0	0	0	0	0	0
PF3D7_0101000.1	0	0	0	0	0	0	0	0.136736
PF3D7_0101600.1	0	0.0287978	0.112066	0.18542	0.516053	0.444288	0.341272	0.298792
PF3D7_0101900.1	0	0	0	0	0	0	0	0
PF3D7_0114700.1	0	0	0	0	0	0	0	0
PF3D7_0115200.1	0	0	0	0	0	0	0	0.119785
PF3D7_0115300.1	0	0	0	0.0772057	0.0281384	0	0	0
PF3D7_0115600.1	0.0608259	0	0	0.743035	0.998976	0.954109	2.20636	2.10734
PF3D7_0200200.1	0	0	0	0	0.0402174	0.0745759	2.38302	2.93399
PF3D7_0200500.1	0	0	0	0	0	0	0	0
PF3D7_0200600.1	0	0	0	0	0	0	0	0
PF3D7_0200700.1	0	0	0	0	0.026921	0	0	0
PF3D7_0201000.1	0	0	0	0	0	0	0	0
PF3D7_0201200.1	0	0	0.0924547	0	0	0	0	0
PF3D7_0222500.1	0	0	0	0	0.0303667	0.0422322	0	0
PF3D7_0222600.1	0.092522	0	0	0.217673	1.28154	0.712915	0	0.237441
PF3D7_0222700.1	0	0.0323403	0.0629259	0	0	0	0.0766506	0
PF3D7_0223100.1	0.170064	0	0	1.20031	3.33821	3.59425	0.0373867	0
PF3D7_0223200.1	0	0	0	0	0	0	0	0
PF3D7_0223400.1	0.205926	0.0159171	0.123882	0.391307	0.869278	1.00115	2.56533	2.31207
PF3D7_0300200.1	0.137624	1.30843	1.7076	0	0	0	0.416008	0.264891
PF3D7_0300500.1	0	0	0	0	0	0	0	0
PF3D7_0300700.1	0	0.0304304	0.0592098	0	0	0	0	0
PF3D7_0300800.1	0	0.0318867	0	0	0	0	0	0
PF3D7_0324400.1	0	0	0.131004	0.11823	0.114907	0.0399514	0	0
PF3D7_0324500.1	0	0	0	0	0	0	0	0.145811
PF3D7_0324800.1	0.459887	1.54985	1.96429	0.865568	1.29826	1.40056	0.674006	1.00319
PF3D7_0400300.1	0.868683	3.79848	2.96755	0.353721	0.884004	0.922065	4.53554	2.03028
PF3D7_0400500.1	0.127809	0	0	0.242867	0.252901	0.158274	0.0702434	0
PF3D7_0400700.1	0	0.11259	0.054768	0	0	0.267235	0.30021	0.525683
PF3D7_0400900.1	0	0	0	0.039239	0	0.0397781	0	0
PF3D7_0401000.1	0	0	0.0700806	0	0	0	0	0
PF3D7_0401200.1	0	0	0	0	0.013097	0.0546436	0	0
PF3D7_0401300.1	0	0	0.0565813	0	0	0.120786	0	0.120686
PF3D7_0401400.1	0	0.0318867	0	0	0	0	0.0755754	0
PF3D7_0401600.1	50.0772	14.8894	24.9993	16.8996	11.554	17.6297	32.1182	46.4515
PF3D7_0413200.1	0	0	0	0.0350446	0	0	0	0
PF3D7_0413300.1	0.0651536	0.0604326	0	0.21224	0.0902454	0.107578	0.0716164	0.125404
PF3D7_0421200.1	0	0	0	0.171518	0.319503	0.115916	0	0.135124
PF3D7_0425700.1	27.6543	62.7238	38.1639	55.0318	48.8691	40.3239	0	0.0709698
PF3D7_0425900.1	2.00543	2.76829	6.68508	0.268996	0.252099	0.285677	1.01141	0.317877
PF3D7_0500400.1	0	0	0	0.034197	0	0.0693336	0	0
PF3D7_0500500.1	0	0	0	0	0.0449295	0	0	0
PF3D7_0532900.1	0.070322	0.0326132	0	0.209987	0.111319	0.116112	12.7154	0
PF3D7_0600300.1	0	0	0.0558666	0	0	0	0.136103	0.953294
PF3D7_0600500.1	0	0	0.0590239	0	0	0	0.0718975	0.251792
PF3D7_0600700.1	0	0	0	0.0353458	0	0	0	0
PF3D7_0617700.1	0	0	0	0	0	0.0403024	0.0804898	0.140942
PF3D7_0631800.1	0	0	0	0	0	0	0	0
PF3D7_0632000.1	0	0	0	0.0340682	0	0	0	0
PF3D7_0632100.1	0	0	0	0	0	0	0	0
PF3D7_0632200.1	0	0	0	0	0	0.0355812	0	0
PF3D7_0632300.1	0	0	0	0.0183763	0.0267898	0	0.148818	0.130294
PF3D7_0632400.1	0	0	0	0.0497536	0.217598	0.151311	0.10073	0.235178
PF3D7_0632700.1	0.275527	0.0141979	0	1.69535	2.36251	2.32522	1.71619	2.71051
PF3D7_0700200.1	0	0	0	0	0	0.0390999	0	0.136736
PF3D7_0700300.1	0.102457	0.0316776	0.0616365	0	0.0135157	0	0	0
PF3D7_0700500.1	0.0714679	0.0165723	0	0	0.0565665	0.0590019	0.078557	0.137557
PF3D7_0701100.1	0.170761	0.190065	0.154091	0.463551	0.689299	1.10901	5.10543	4.07553
PF3D7_0701800.1	0	0	0.0660778	0.0397562	0	0	0	0
PF3D7_0713000.1	0	0	0	0	0	0.0739149	0	0
PF3D7_0732200.1	0	0	0.0282057	0	0	0	0	0
PF3D7_0732300.1	0	0	0	0	0	0	0	0
PF3D7_0732400.1	0	0	0	0.0735054	0	0.0931441	0	0.130294
PF3D7_0732500.1	0	0	0	0.0333647	0	0.0338231	0	0
PF3D7_0732700.1	0	0	0	0.0378599	0	0.0383801	0	0
PF3D7_0732900.1	0.199996	0	0.0902358	0.398135	0.646374	0.825555	0.69614	2.11717
PF3D7_0800400.1	1.60122	3.72878	2.92055	1.20228	1.67183	1.3688	3.07072	3.01636
PF3D7_0800500.1	0	0	0	0.0669269	0	0.0339232	0	0
PF3D7_0808800.1	3.04792	1.1579	5.00335	0	0.025664	0	3.13641	0.249637
PF3D7_0808900.1	3.35713	1.12445	3.97188	0	0	0	1.80407	0
PF3D7_0832500.1	0	0	0	0	0	0	0.159996	0.14008
PF3D7_0832800.1	0	0	0	0	0	0	0	0.147963
PF3D7_0833000.1	0	0	0	0	0.0277595	0.0772124	0	0
PF3D7_0833100.1	0	0	0	0.0359068	0	0.0364001	0	0
PF3D7_0833200.1	0	0	0	0	0	0	0	0
PF3D7_0833400.1	0.370512	0	0	0.749776	0.933095	1.26062	0.222144	0.259324
PF3D7_0900200.1	0.244913	0.0425937	0.0552509	1.24658	1.52655	1.87029	4.13905	4.18362
PF3D7_0900300.1	0.201122	0	0	0.582366	1.00818	0.701061	1.10536	0
PF3D7_0900400.1	0.140407	0.0325582	0.1267	0.876646	1.15299	1.56487	0.463003	0.878303
PF3D7_0900500.1	0	0	0	0.0397912	0	0.161352	0.0805606	0.564263
PF3D7_0900600.1	0.0624206	0.0289488	0	0.406675	1.00046	1.21961	0.0343062	0.240287
PF3D7_0900700.1	0.0612732	0	0	0.0831665	0.206114	0.168618	0	0
PF3D7_0901000.1	0	0	0	0	0	0	0	0
PF3D7_0901100.1	0	0	0	0	0	0	0	0
PF3D7_0901300.1	0	0	0	0	0	0	0.0708958	0
PF3D7_0901400.1	0	0	0	0	0.0270757	0.0376553	0	0
PF3D7_0901500.1	0.093421	0.0288839	0	0	0	0.0342782	0	0
PF3D7_0937300.1	0.196228	0.166842	0.177072	0	0	0	0	0
PF3D7_0937400.1	0.0688122	0.127652	0.0620945	0	0.0272322	0	0	0
PF3D7_0937500.1	0.988121	0.977623	2.05081	0.268237	0.169453	0.435075	0.579272	0.633959
PF3D7_0937700.1	1.99596	3.16752	4.50278	0.694216	1.01206	0.669425	1.02841	1.44064
PF3D7_1000200.1	0.247642	0.114849	0.111733	0.0840315	0.0857532	0.11926	1.08883	2.26407
PF3D7_1000300.1	0	0	0.0631373	0.037987	0	0	0.076908	0
PF3D7_1000400.1	0	0	0	0	0	0	0.0694973	0
PF3D7_1000500.1	0.0312571	0.0434883	0.169234	0	0	0.10322	0	0
PF3D7_1000600.1	2.08023	0.61479	1.63791	0.132871	0.347054	0.448988	0.381096	0.157016
PF3D7_1040000.1	0	0	0	0	0	0.0584009	0	0.136156
PF3D7_1040100.1	0.0789872	0	0	0.536049	0.562662	0.782517	0.0868222	0
PF3D7_1040300.1	0.0612732	0.042625	0.0276458	0.349299	0.484974	0.303513	0.404106	0.117935
PF3D7_1040400.1	0	0	0.062352	0.0375146	0.0136726	0	0.0379757	0
PF3D7_1040500.1	0	0.0305025	0.05935	0.0357084	0	0	0	0.189888
PF3D7_1040600.1	0	0	0	0	0	0.0395722	0	0
PF3D7_1040700.1	0	0	0	0	0	0	0	0.121786
PF3D7_1040800.1	0	0	0	0	0	0	0	0
PF3D7_1040900.1	0	0	0	0	0.0148551	0	0	0
PF3D7_1041000.1	0	0	0	0	0.0260081	0.0361705	0	0.126492
PF3D7_1041100.1	0	0	0	0	0.167119	0.0774733	0.232088	0
PF3D7_1041200.1	0	0.0286696	0	0	0.146787	0.136095	0.203852	0.118985
PF3D7_1100300.1	0.495179	0	0	4.916	4.89914	5.82062	0.194392	0.136156
PF3D7_1100400.1	0.0348376	0	0	0.0378282	0.0275738	0.038348	0	0
PF3D7_1100500.1	0.479765	0.102693	0	0.520951	0.350522	0.304678	0	0
PF3D7_1101100.1	0.260411	0.0905781	0.0293736	0.353458	0.78581	0.322482	1.07341	0.814489
PF3D7_1101200.1	0	0	0	0	0.0272773	0	0	0
PF3D7_1101300.1	0	0	0.062716	0.0754672	0	0.153008	0.15279	0
PF3D7_1149800.1	0	0.103149	0.234153	0.181131	0	0.204022	0.570447	0.285395
PF3D7_1150000.1	0	0	0	0	0	0	0.068974	0
PF3D7_1150200.1	0	0	0	0	0.0262984	0	0	0
PF3D7_1150300.1	0.0705601	0.0327237	0	1.20672	1.6894	1.1068	0	0
PF3D7_1200200.1	0	0.098949	0	0	0	0.0671019	1.60815	1.99463
PF3D7_1200300.1	0	0	0	0.191058	0.0696331	0.0387366	0	0
PF3D7_1200500.1	0	0.0503474	0.117556	0.400794	0.592887	0.585551	0.811442	0.376114
PF3D7_1253700.1	0	0	0	0.0351262	0	0	0	0.124528
PF3D7_1254000.1	0	0	0	0	0	0	0	0
PF3D7_1254200.1	0.064799	0	0.0584732	0.105543	0.307729	0.517131	0.0712266	0
PF3D7_1254400.1	0	0	0	0.0167689	0	0	0	0
PF3D7_1254500.1	0	0	0	0	0	0	0	0.148236
PF3D7_1254700.1	0	0.0481079	0	0.150183	0.0821035	0	0	0.133105
PF3D7_1254800.1	0	0.0174241	0	0.10199	0.0446054	0.0413563	0.0825946	0
PF3D7_1255000.1	0	0	0	0	0	0	0	0
PF3D7_1255100.1	0	0	0	0.0749049	0.0272999	0.0189835	0.151651	0.265549
PF3D7_1300200.1	0.130511	0	0	0.602289	1.26541	0.8081	0.968336	1.1304
PF3D7_1300400.1	0	0	0	0.590783	1.11131	0.540942	0.694505	1.21611
PF3D7_1300500.1	0.0696752	0	0	0.0378282	0.0551476	0.172566	0.650985	0.469374
PF3D7_1300600.1	0	0	0	0.0189617	0.0414647	0.134555	0.0767791	0.268888
PF3D7_1300700.1	0	0	0	0.0688624	0	0.0698085	0.557671	0
PF3D7_1372600.1	0.289145	0.0134097	0	2.43324	2.30001	3.24646	0.413174	0.111306
PF3D7_1372700.1	0	0	0	0.0707468	0.0257844	0.0358594	0	0.125404
PF3D7_1373000.1	0	0	0	0	0	0	0	0
PF3D7_1373100.1	0	0	0	0	0	0	0	0
PF3D7_1373300.1	0	0	0	0	0	0.0743342	0	0
PF3D7_1373400.1	0.061004	0	0	0.132482	0.579413	0.654723	3.05101	2.40705
PF3D7_1400200.1	0	0	0.112992	0	0.024777	0	0	0
PF3D7_1400300.1	0	0	0	0	0.0576543	0	0	0
PF3D7_1400400.1	0	0	0.0607403	0	0	0	0	0
PF3D7_1400500.1	0	0	0.0561168	0	0	0	0	0
PF3D7_1400600.1	0	0	0.0562848	0.0338642	0.0246843	0	0.068561	0.120054
PF3D7_1400800.1	0	0	0	0	0	0	0	0
PF3D7_1479400.1	0	0	0	0	0	0	0.036875	0
PF3D7_1479600.1	0	0	0	0	0	0	0	0
PF3D7_1479700.1	0	0	0.0591167	0	0	0	0.144021	0
PF3D7_1479800.1	0	0	0	0	0	0	0	0
PF3D7_1480000.1	0.0377407	0.070012	0	0	0	0	0	0

## Sheet: 3D7 rif genes reads
Geneid	SLI-3D70425800(1).bam	SLI-3D70425800(2).bam	SLI-3D70425800(3).bam	SLI-3D7MEEDvar0425800(1).bam	SLI-3D7MEEDvar0425800(2).bam	SLI-3D7MEEDvar0425800(3).bam	SLI-3D7var0809100.bam	SLI-3D7-var2csa.bam
PF3D7_0100200.1	0	6	1	0	0	0	57	50
PF3D7_0100400.1	8	10	12	0	0	0	6	20
PF3D7_0100600.1	0	0	0	0	0	0	0	0
PF3D7_0100800.1	0	0	0	0	0	0	0	0
PF3D7_0100900.1	0	0	0	0	0	0	0	0
PF3D7_0101000.1	0	0	0	0	0	0	0	2
PF3D7_0101600.1	0	2	4	11	42	26	10	5
PF3D7_0101900.1	0	0	0	0	0	0	0	0
PF3D7_0114700.1	0	0	0	0	0	0	0	0
PF3D7_0115200.1	0	0	0	0	0	0	0	2
PF3D7_0115300.1	0	0	0	4	2	0	0	0
PF3D7_0115600.1	2	0	0	45	83	57	66	36
PF3D7_0200200.1	0	0	0	0	3	4	64	45
PF3D7_0200500.1	0	0	0	0	0	0	0	0
PF3D7_0200600.1	0	0	0	0	0	0	0	0
PF3D7_0200700.1	0	0	0	0	2	0	0	0
PF3D7_0201000.1	0	0	0	0	0	0	0	0
PF3D7_0201200.1	0	0	3	0	0	0	0	0
PF3D7_0222500.1	0	0	0	0	2	2	0	0
PF3D7_0222600.1	3	0	0	13	105	42	0	4
PF3D7_0222700.1	0	2	2	0	0	0	2	0
PF3D7_0223100.1	5	0	0	65	248	192	1	0
PF3D7_0223200.1	0	0	0	0	0	0	0	0
PF3D7_0223400.1	6	1	4	21	64	53	68	35
PF3D7_0300200.1	4	82	55	0	0	0	11	4
PF3D7_0300500.1	0	0	0	0	0	0	0	0
PF3D7_0300700.1	0	2	2	0	0	0	0	0
PF3D7_0300800.1	0	2	0	0	0	0	0	0
PF3D7_0324400.1	0	0	4	6	8	2	0	0
PF3D7_0324500.1	0	0	0	0	0	0	0	2
PF3D7_0324800.1	15	109	71	52	107	83	20	17
PF3D7_0400300.1	28	264	106	21	72	54	133	34
PF3D7_0400500.1	4	0	0	14	20	9	2	0
PF3D7_0400700.1	0	8	2	0	0	16	9	9
PF3D7_0400900.1	0	0	0	2	0	2	0	0
PF3D7_0401000.1	0	0	2	0	0	0	0	0
PF3D7_0401200.1	0	0	0	0	1	3	0	0
PF3D7_0401300.1	0	0	2	0	0	7	0	2
PF3D7_0401400.1	0	2	0	0	0	0	2	0
PF3D7_0401600.1	2048	1313	1133	1273	1194	1310	1195	987
PF3D7_0413200.1	0	0	0	2	0	0	0	0
PF3D7_0413300.1	2	4	0	12	7	6	2	2
PF3D7_0421200.1	0	0	0	9	23	6	0	2
PF3D7_0425700.1	750	3668	1147	2749	3349	1987	0	1
PF3D7_0425900.1	85	253	314	21	27	22	39	7
PF3D7_0500400.1	0	0	0	2	0	4	0	0
PF3D7_0500500.1	0	0	0	0	3	0	0	0
PF3D7_0532900.1	2	2	0	11	8	6	329	0
PF3D7_0600300.1	0	0	2	0	0	0	4	16
PF3D7_0600500.1	0	0	2	0	0	0	2	4
PF3D7_0600700.1	0	0	0	2	0	0	0	0
PF3D7_0617700.1	0	0	0	0	0	2	2	2
PF3D7_0631800.1	0	0	0	0	0	0	0	0
PF3D7_0632000.1	0	0	0	2	0	0	0	0
PF3D7_0632100.1	0	0	0	0	0	0	0	0
PF3D7_0632200.1	0	0	0	0	0	2	0	0
PF3D7_0632300.1	0	0	0	1	2	0	4	2
PF3D7_0632400.1	0	0	0	3	18	9	3	4
PF3D7_0632700.1	9	1	0	102	195	138	51	46
PF3D7_0700200.1	0	0	0	0	0	2	0	2
PF3D7_0700300.1	3	2	2	0	1	0	0	0
PF3D7_0700500.1	2	1	0	0	4	3	2	2
PF3D7_0701100.1	5	12	5	25	51	59	136	62
PF3D7_0701800.1	0	0	2	2	0	0	0	0
PF3D7_0713000.1	0	0	0	0	0	4	0	0
PF3D7_0732200.1	0	0	1	0	0	0	0	0
PF3D7_0732300.1	0	0	0	0	0	0	0	0
PF3D7_0732400.1	0	0	0	4	0	5	0	2
PF3D7_0732500.1	0	0	0	2	0	2	0	0
PF3D7_0732700.1	0	0	0	2	0	2	0	0
PF3D7_0732900.1	6	0	3	22	49	45	19	33
PF3D7_0800400.1	47	236	95	65	124	73	82	46
PF3D7_0800500.1	0	0	0	4	0	2	0	0
PF3D7_0808800.1	94	77	171	0	2	0	88	4
PF3D7_0808900.1	90	65	118	0	0	0	44	0
PF3D7_0832500.1	0	0	0	0	0	0	4	2
PF3D7_0832800.1	0	0	0	0	0	0	0	2
PF3D7_0833000.1	0	0	0	0	2	4	0	0
PF3D7_0833100.1	0	0	0	2	0	2	0	0
PF3D7_0833200.1	0	0	0	0	0	0	0	0
PF3D7_0833400.1	11	0	0	41	70	68	6	4
PF3D7_0900200.1	8	3	2	75	126	111	123	71
PF3D7_0900300.1	6	0	0	32	76	38	30	0
PF3D7_0900400.1	4	2	4	46	83	81	12	13
PF3D7_0900500.1	0	0	0	2	0	8	2	8
PF3D7_0900600.1	2	2	0	24	81	71	1	4
PF3D7_0900700.1	2	0	0	5	17	10	0	0
PF3D7_0901000.1	0	0	0	0	0	0	0	0
PF3D7_0901100.1	0	0	0	0	0	0	0	0
PF3D7_0901300.1	0	0	0	0	0	0	2	0
PF3D7_0901400.1	0	0	0	0	2	2	0	0
PF3D7_0901500.1	3	2	0	0	0	2	0	0
PF3D7_0937300.1	6	11	6	0	0	0	0	0
PF3D7_0937400.1	2	8	2	0	2	0	0	0
PF3D7_0937500.1	30	64	69	15	13	24	16	10
PF3D7_0937700.1	64	219	160	41	82	39	30	24
PF3D7_1000200.1	8	8	4	5	7	7	32	38
PF3D7_1000300.1	0	0	2	2	0	0	2	0
PF3D7_1000400.1	0	0	0	0	0	0	2	0
PF3D7_1000500.1	1	3	6	0	0	6	0	0
PF3D7_1000600.1	102	65	89	12	43	40	17	4
PF3D7_1040000.1	0	0	0	0	0	3	0	2
PF3D7_1040100.1	2	0	0	25	36	36	2	0
PF3D7_1040300.1	2	3	1	21	40	18	12	2
PF3D7_1040400.1	0	0	2	2	1	0	1	0
PF3D7_1040500.1	0	2	2	2	0	0	0	3
PF3D7_1040600.1	0	0	0	0	0	2	0	0
PF3D7_1040700.1	0	0	0	0	0	0	0	2
PF3D7_1040800.1	0	0	0	0	0	0	0	0
PF3D7_1040900.1	0	0	0	0	1	0	0	0
PF3D7_1041000.1	0	0	0	0	2	2	0	2
PF3D7_1041100.1	0	0	0	0	12	4	6	0
PF3D7_1041200.1	0	2	0	0	12	8	6	2
PF3D7_1100300.1	14	0	0	256	350	299	5	2
PF3D7_1100400.1	1	0	0	2	2	2	0	0
PF3D7_1100500.1	13	6	0	26	24	15	0	0
PF3D7_1101100.1	8	6	1	20	61	18	30	13
PF3D7_1101200.1	0	0	0	0	2	0	0	0
PF3D7_1101300.1	0	0	2	4	0	8	4	0
PF3D7_1149800.1	0	6	7	9	0	10	14	4
PF3D7_1150000.1	0	0	0	0	0	0	2	0
PF3D7_1150200.1	0	0	0	0	2	0	0	0
PF3D7_1150300.1	2	2	0	63	121	57	0	0
PF3D7_1200200.1	0	7	0	0	0	4	48	34
PF3D7_1200300.1	0	0	0	10	5	2	0	0
PF3D7_1200500.1	0	5	6	34	69	49	34	9
PF3D7_1253700.1	0	0	0	2	0	0	0	2
PF3D7_1254000.1	0	0	0	0	0	0	0	0
PF3D7_1254200.1	2	0	2	6	24	29	2	0
PF3D7_1254400.1	0	0	0	1	0	0	0	0
PF3D7_1254500.1	0	0	0	0	0	0	0	2
PF3D7_1254700.1	0	3	0	8	6	0	0	2
PF3D7_1254800.1	0	1	0	5	3	2	2	0
PF3D7_1255000.1	0	0	0	0	0	0	0	0
PF3D7_1255100.1	0	0	0	4	2	1	4	4
PF3D7_1300200.1	4	0	0	34	98	45	27	18
PF3D7_1300400.1	0	0	0	31	80	28	18	18
PF3D7_1300500.1	2	0	0	2	4	9	17	7
PF3D7_1300600.1	0	0	0	1	3	7	2	4
PF3D7_1300700.1	0	0	0	4	0	4	16	0
PF3D7_1372600.1	10	1	0	155	201	204	13	2
PF3D7_1372700.1	0	0	0	4	2	2	0	2
PF3D7_1373000.1	0	0	0	0	0	0	0	0
PF3D7_1373100.1	0	0	0	0	0	0	0	0
PF3D7_1373300.1	0	0	0	0	0	4	0	0
PF3D7_1373400.1	2	0	0	8	48	39	91	41
PF3D7_1400200.1	0	0	4	0	2	0	0	0
PF3D7_1400300.1	0	0	0	0	4	0	0	0
PF3D7_1400400.1	0	0	2	0	0	0	0	0
PF3D7_1400500.1	0	0	2	0	0	0	0	0
PF3D7_1400600.1	0	0	2	2	2	0	2	2
PF3D7_1400800.1	0	0	0	0	0	0	0	0
PF3D7_1479400.1	0	0	0	0	0	0	1	0
PF3D7_1479600.1	0	0	0	0	0	0	0	0
PF3D7_1479700.1	0	0	2	0	0	0	4	0
PF3D7_1479800.1	0	0	0	0	0	0	0	0
PF3D7_1480000.1	1	4	0	0	0	0	0	0

## Sheet: deseq2 var19
Differential gene expression analysis with DESeq2 (version 1.42.0)
Control:	unpanned_IT4-SLI-var19-K2-01	unpanned_IT4-SLI-var19-K2-02	unpanned_IT4-SLI-var19-K2-03	unpanned_IT4-SLI-var19-K2-04
Treatment	panned-5x_IT4-SLI-var19-K2-P5_230531	panned-5x_IT4-SLI-var19-K2-P5_230604	panned_5x-IT4-SLI-var19-K2_P5_230614	panned_5x-IT4-SLI-var19-K2_P5_231121
Row_Names	baseMean	log2FoldChange	stat	pvalue	padj
PfIT_140007400	23.9664	2.93833	-4.58799	4.47526e-06	0.0239784
PfIT_140084700	332.199	3.73223	-4.34509	1.3922e-05	0.037297
PfIT_140085300	85.8291	1.51591	-4.03167	5.53821e-05	0.0989124
PfIT_040025700	29.2774	-2.23972	3.50377	0.000458718	0.538052
PfIT_140083100	69.1058	2.51295	-3.47963	0.000502101	0.538052
PfIT_030006400	541.165	-1.47946	2.70848	0.0067592	0.998817
PfIT_050038100	3.60634	3.71818	-2.67132	0.00755526	0.998817
PfIT_030029500	32.5907	1.30969	-2.65986	0.00781742	0.998817
PfIT_110011500	29.4513	1.26177	-2.63057	0.00852411	0.998817
PfIT_020026200	27.4273	1.33263	-2.6185	0.00883161	0.998817
PfIT_050020400	6.57188	2.31806	-2.60537	0.0091774	0.998817
PfIT_140066500	83.8277	-1.24379	2.49624	0.0125519	0.998817
PfIT_090014700	34.4142	1.10793	-2.48386	0.0129968	0.998817
PfIT_050007300	60.8223	0.876953	-2.42291	0.0153967	0.998817
PfIT_030010000	1653.03	0.539544	-2.39792	0.0164885	0.998817
PfIT_100015300	8.10431	1.98292	-2.36802	0.0178836	0.998817
PfIT_130074700	98.8156	0.84151	-2.36535	0.018013	0.998817
PfIT_050038200	9.93727	1.79642	-2.34889	0.0188295	0.998817
PfIT_090018100	55.7749	0.895839	-2.33248	0.0196756	0.998817
PfIT_130069200	123.975	0.883698	-2.30746	0.0210292	0.998817
PfIT_110031500	458.43	-0.995655	2.29255	0.0218738	0.998817
PfIT_010005200	8.96119	-2.74006	2.27898	0.022668	0.998817
PfIT_040029600	18.5174	1.16456	-2.26451	0.0235425	0.998817
PfIT_100012500	476.045	-0.728214	2.25901	0.0238826	0.998817
PfIT_120045800	8.35144	-1.66028	2.23603	0.0253498	0.998817
PfIT_040025800	44.4053	-1.04473	2.22881	0.0258262	0.998817
PfIT_100026300	130.842	0.70797	-2.2239	0.0261553	0.998817
PfIT_120013900	32.5072	1.30123	-2.22014	0.0264092	0.998817
PfIT_090010900	44.6462	0.765295	-2.21562	0.0267178	0.998817
PfIT_120014500	26.9477	1.06802	-2.20667	0.0273373	0.998817
PfIT_120049800	28.5048	1.03973	-2.20014	0.0277971	0.998817
PfIT_050031500	448.358	-0.75967	2.1836	0.0289913	0.998817
PfIT_130074300	100.084	0.965785	-2.15994	0.0307775	0.998817
PfIT_050022300	24.3131	1.34874	-2.14935	0.0316068	0.998817
PfIT_120048500	6.073	1.82755	-2.14656	0.0318279	0.998817
PfIT_110017600	123.091	-0.624844	2.14342	0.032079	0.998817
PfIT_090034300	4.55217	2.69605	-2.13408	0.0328361	0.998817
PfIT_060033300	983.901	-0.586245	2.13102	0.0330875	0.998817
PfIT_110049900	10.642	1.84576	-2.12814	0.0333256	0.998817
PfIT_030023100	666.703	-0.925246	2.12316	0.0337406	0.998817
PfIT_060034300	251.302	0.57007	-2.12296	0.0337573	0.998817
PfIT_110048000	1055.21	-0.838384	2.12129	0.033897	0.998817
PfIT_020006400	106.669	0.959912	-2.1202	0.0339893	0.998817
PfIT_140020500	408.795	-0.790534	2.0946	0.0362069	0.998817
PfIT_030027300	50.3313	1.02846	-2.08999	0.0366188	0.998817
PfIT_070031900	3208.52	-0.737498	2.06919	0.0385283	0.998817
PfIT_010013100	38.7287	1.0022	-2.05919	0.0394763	0.998817
PfIT_140077300	2645.29	-0.634929	2.04929	0.0404342	0.998817
PfIT_080014400	217.161	-0.853431	2.04768	0.0405915	0.998817
PfIT_080023000	102.027	-0.776784	2.04218	0.0411339	0.998817
PfIT_020019300	1115.01	-0.82349	2.03498	0.0418532	0.998817
PfIT_140056400	268.654	-0.830037	2.02636	0.0427276	0.998817
PfIT_050011850	3.96962	2.51411	-2.02562	0.0428039	0.998817
PfIT_050015600	152.409	0.596902	-2.01328	0.044085	0.998817
PfIT_120015700	68.5246	0.753078	-2.01255	0.0441619	0.998817
PfIT_080026900	21.7609	1.36858	-1.99183	0.0463897	0.998817
PfIT_140016200	177.782	-0.704684	1.9779	0.0479396	0.998817
PfIT_140032100	291.216	0.555305	-1.97725	0.0480138	0.998817
PfIT_060016300	2.01416	3.63011	-1.96617	0.0492784	0.998817
PfIT_130020100	18.1446	1.20618	-1.96021	0.0499718	0.998817
PfIT_080008200	7.44011	1.65638	-1.9463	0.0516191	0.998817
PfIT_110043400	3425.55	-0.974983	1.93944	0.0524483	0.998817
PfIT_020020600	53.9372	0.796836	-1.93857	0.0525542	0.998817
PfIT_110008700	1819.18	-0.688034	1.93478	0.0530177	0.998817
PfIT_050031600	34.1711	0.94403	-1.9341	0.0531009	0.998817
PfIT_090010400	224.148	-0.479113	1.92949	0.0536706	0.998817
PfIT_140076600	157.389	-0.691069	1.92849	0.0537943	0.998817
PfIT_090015900	13.3501	1.4903	-1.92723	0.0539508	0.998817
PfIT_090009800	780.17	-0.667518	1.92601	0.0541031	0.998817
PfIT_100008300	45.1531	0.895343	-1.92562	0.0541523	0.998817
PfIT_050009200	22.5568	1.20095	-1.9253	0.0541916	0.998817
PfIT_030022200	140.296	-0.623581	1.91795	0.0551177	0.998817
PfIT_050018800	8.97195	-1.76408	1.91719	0.0552137	0.998817
PfIT_130055800	880.117	-0.688781	1.91561	0.055415	0.998817
PfIT_120058200	1.431	-3.99643	1.90874	0.0562961	0.998817
PfIT_080012400	512.052	-0.749791	1.89699	0.0578287	0.998817
PfIT_070017400	2.95082	3.26803	-1.89389	0.0582396	0.998817
PfIT_080016700	30.3031	1.20922	-1.89322	0.0583289	0.998817
PfIT_030015600	402.126	-0.735549	1.89297	0.0583614	0.998817
PfIT_070015300	78.9599	0.667968	-1.89286	0.058377	0.998817
PfIT_140072700	460.083	-0.537786	1.8901	0.0587451	0.998817
PfIT_130049400	420.829	-0.609557	1.88769	0.0590673	0.998817
PfIT_130065500	267.691	-0.785718	1.88656	0.0592191	0.998817
PfIT_140031100:snoRNA	9.01594	1.90642	-1.88472	0.0594672	0.998817
PfIT_120046800	89.5664	0.801472	-1.87775	0.0604148	0.998817
PfIT_090030700	31.8345	0.884348	-1.87587	0.0606729	0.998817
PfIT_090041400	311.658	-0.857262	1.87254	0.0611319	0.998817
PfIT_140082800	33.4557	-1.18278	1.86755	0.0618249	0.998817
PfIT_050015000	1314.51	-0.518979	1.86611	0.0620257	0.998817
PfIT_140081000	1028.1	-0.581491	1.86596	0.0620476	0.998817
PfIT_130074400	96.3108	0.695438	-1.85326	0.0638445	0.998817
PfIT_090039300	1172.76	-0.566392	1.8483	0.064559	0.998817
PfIT_120021200	368.266	-0.727384	1.84605	0.0648845	0.998817
PfIT_040019400	299.247	-0.824766	1.83426	0.0666155	0.998817
PfIT_140083400	6.94429	-1.71004	1.83294	0.0668115	0.998817
PfIT_080013900	22.1129	0.871597	-1.83262	0.0668584	0.998817
PfIT_100034400	412.338	0.446631	-1.82406	0.0681428	0.998817
PfIT_010007200	104.45	0.674859	-1.81629	0.0693265	0.998817
PfIT_130010000	430.551	-0.656373	1.81562	0.069428	0.998817
PfIT_100006600	7356.7	-0.634862	1.81207	0.0699757	0.998817
PfIT_120011300	1211.71	-0.693032	1.81001	0.0702942	0.998817
PfIT_080014100	204.727	-0.880122	1.80736	0.0707054	0.998817
PfIT_030009000	232.869	-0.620141	1.80586	0.0709408	0.998817
PfIT_130035400	96.3135	0.873744	-1.80547	0.0710018	0.998817
PfIT_090014500	554.895	-0.82294	1.80435	0.0711769	0.998817
PfIT_140060900	521.665	-0.752786	1.8034	0.071325	0.998817
PfIT_110008200	755.073	-0.606605	1.80237	0.071487	0.998817
PfIT_140080900	62.8583	0.635566	-1.79335	0.0729165	0.998817
PfIT_130015100	3.09613	2.2597	-1.79011	0.0734368	0.998817
PfIT_050017700	965.937	-0.59028	1.78994	0.0734642	0.998817
PfIT_090018800	501.907	-0.655793	1.78881	0.0736456	0.998817
PfIT_130027000	5069.68	-0.583758	1.78813	0.0737545	0.998817
PfIT_060024800	65.555	0.86349	-1.78773	0.0738199	0.998817
PfIT_110022900	1471.36	-0.685913	1.78305	0.0745775	0.998817
PfIT_100018500	104.93	-0.608239	1.78178	0.0747845	0.998817
PfIT_100005500	4.99359	1.60438	-1.78009	0.0750608	0.998817
PfIT_030018000	73.2602	0.573677	-1.77882	0.0752694	0.998817
PfIT_130064800	4028.97	-0.534667	1.7765	0.0756503	0.998817
PfIT_030022100	3119.36	-0.570096	1.77646	0.0756578	0.998817
PfIT_140048900	113.173	0.722428	-1.77634	0.0756762	0.998817
PfIT_140025450	28.2718	-1.00431	1.77584	0.0757593	0.998817
PfIT_130030000	469.839	-0.640557	1.77252	0.0763075	0.998817
PfIT_120006400	445.638	-0.852679	1.77227	0.0763493	0.998817
PfIT_110042800	7.03124	1.57019	-1.77206	0.076384	0.998817
PfIT_070016000	242.333	-0.628137	1.76872	0.0769409	0.998817
PfIT_130012800	496.381	-0.623906	1.76831	0.0770092	0.998817
PfIT_120055600	23.4241	0.982594	-1.76799	0.0770622	0.998817
PfIT_100013400	332.967	-0.723808	1.76584	0.0774228	0.998817
PfIT_050016800	73.7078	0.717067	-1.76505	0.0775549	0.998817
PfIT_140042700	6741.32	-0.716344	1.76183	0.0780974	0.998817
PfIT_080005100	7.08241	-1.30228	1.76062	0.0783028	0.998817
PfIT_080027300	338.372	-0.73293	1.75838	0.0786828	0.998817
PfIT_060012400	159.931	0.723026	-1.7529	0.0796185	0.998817
PfIT_090009700	9.07882	1.72756	-1.74973	0.0801652	0.998817
PfIT_120035700	3771.37	-0.567723	1.74527	0.080937	0.998817
PfIT_140024800	35.0072	0.881172	-1.74344	0.081257	0.998817
PfIT_140012000	49.7496	0.908261	-1.73844	0.0821341	0.998817
PfIT_140080800	840.43	-0.602859	1.73835	0.0821499	0.998817
PfIT_120031000	20.3365	1.08541	-1.73753	0.0822937	0.998817
PfIT_000007200	54.1382	0.942033	-1.73637	0.0824981	0.998817
PfIT_110049300	529.289	-0.601166	1.73334	0.0830353	0.998817
PfIT_050035000	1476.46	-0.56465	1.73036	0.0835658	0.998817
PfIT_130046400:snRNA	30.7775	-1.36938	1.72832	0.0839302	0.998817
PfIT_110033200	24.5195	1.28546	-1.72827	0.0839397	0.998817
PfIT_070013000	270.194	-0.803735	1.72326	0.0848418	0.998817
PfIT_090033600	560.227	-0.773884	1.7224	0.084997	0.998817
PfIT_130074900	157.644	0.63136	-1.7195	0.0855233	0.998817
PfIT_060012100	478.63	0.594361	-1.71885	0.0856424	0.998817
PfIT_070020800	53.5583	0.912032	-1.71834	0.0857349	0.998817
PfIT_050024400	867.856	-0.513597	1.71829	0.0857435	0.998817
PfIT_130058900	67.3476	-0.713388	1.71722	0.0859397	0.998817
PfIT_120019200	1375.64	-0.733684	1.71455	0.0864278	0.998817
PfIT_130057500	1255.55	-0.608703	1.71407	0.0865164	0.998817
PfIT_070014700	52.5076	-0.605025	1.71212	0.0868739	0.998817
PfIT_120027700	35.0613	-0.806045	1.71	0.0872667	0.998817
PfIT_110036200	54.9284	0.888433	-1.70981	0.0873019	0.998817
PfIT_130063700	23.1232	-0.980741	1.70359	0.0884577	0.998817
PfIT_130054200	68.4668	-0.771525	1.70165	0.0888218	0.998817
PfIT_070031700	699.951	0.414348	-1.69982	0.0891643	0.998817
PfIT_130017100	797.754	-0.708348	1.6994	0.089244	0.998817
PfIT_060015500	16.2409	-1.16851	1.69785	0.0895359	0.998817
PfIT_090014400	983.311	-0.534107	1.69663	0.0897662	0.998817
PfIT_130024100	2516.26	-0.515795	1.69612	0.0898631	0.998817
PfIT_110045400	12.1891	1.45135	-1.69497	0.0900817	0.998817
PfIT_140026700	858.538	-0.592229	1.69494	0.0900867	0.998817
PfIT_100022400	1627.64	-0.624401	1.69257	0.0905372	0.998817
PfIT_130042000	919.208	-0.667128	1.69197	0.090651	0.998817
PfIT_070010000	87.7404	0.875004	-1.6908	0.0908752	0.998817
PfIT_100022800	1781.27	-0.61053	1.68876	0.0912662	0.998817
PfIT_110028300	350.587	-0.590945	1.68783	0.0914433	0.998817
PfIT_050020000	123.791	0.499966	-1.68506	0.0919777	0.998817
PfIT_140041000	2898.38	-0.664673	1.68113	0.092737	0.998817
PfIT_070010500	61.9403	-0.705094	1.68097	0.0927688	0.998817
PfIT_130048000	182.762	-0.735028	1.67683	0.0935765	0.998817
PfIT_140060600	514.879	-0.629035	1.67683	0.0935767	0.998817
PfIT_050007400	586.021	0.413634	-1.67399	0.0941322	0.998817
PfIT_010007300	54.6356	0.539542	-1.66783	0.0953496	0.998817
PfIT_120038600	29.8474	1.06262	-1.66713	0.0954882	0.998817
PfIT_080006400	8399.51	-0.608373	1.66602	0.0957098	0.998817
PfIT_090014300	79.2375	1.09988	-1.66344	0.0962235	0.998817
PfIT_130058400	4122.35	-0.536771	1.66031	0.0968526	0.998817
PfIT_120030000	239.345	-0.688501	1.65902	0.0971108	0.998817
PfIT_120019500	44.2298	-0.585832	1.65901	0.0971146	0.998817
PfIT_090019200	361.303	-0.553651	1.6583	0.0972563	0.998817
PfIT_070033300	1507.04	-0.677298	1.65727	0.0974644	0.998817
PfIT_070017900	72.1356	0.572387	-1.65168	0.0986006	0.998817
PfIT_100039700	566.207	-1.05931	1.64898	0.0991508	0.998817
PfIT_140055200	69.6971	0.530425	-1.64694	0.0995696	0.998817
PfIT_130029700	587.304	-0.664981	1.64395	0.100187	0.998817
PfIT_140063200	4193.05	-0.639464	1.6438	0.100217	0.998817
PfIT_100025200	618.425	-0.473239	1.64226	0.100537	0.998817
PfIT_120014200	1393.17	-0.641703	1.642	0.10059	0.998817
PfIT_110021100	4256.3	-0.684163	1.64156	0.100681	0.998817
PfIT_110020000	1753.44	-0.531464	1.63716	0.101596	0.998817
PfIT_020008800	15.0238	1.21194	-1.63218	0.102641	0.998817
PfIT_130071000	331.843	-0.48033	1.62893	0.103329	0.998817
PfIT_090027500	368.881	-0.634526	1.62861	0.103395	0.998817
PfIT_040022700	15653.6	-0.543804	1.62346	0.104492	0.998817
PfIT_060021900	31.3982	0.817584	-1.62122	0.104971	0.998817
PfIT_080027500	39.6529	0.738653	-1.62089	0.105042	0.998817
PfIT_080017600	143.79	-0.65338	1.62084	0.105052	0.998817
PfIT_130050000	189.966	-0.517788	1.62024	0.10518	0.998817
PfIT_110050200	1001.03	-0.623284	1.61838	0.105581	0.998817
PfIT_010016900	87.5192	-0.644908	1.61831	0.105596	0.998817
PfIT_080031800	102.091	0.723879	-1.61822	0.105615	0.998817
PfIT_020015100	59.495	0.787522	-1.61696	0.105887	0.998817
PfIT_020025200	499.558	-0.736904	1.61616	0.106059	0.998817
PfIT_090010600	692.507	-0.635165	1.61516	0.106276	0.998817
PfIT_030013400	1055.75	-0.54948	1.61229	0.106898	0.998817
PfIT_130045400	169.176	-0.604317	1.61158	0.107054	0.998817
PfIT_140057100	4131.33	-0.653458	1.61152	0.107067	0.998817
PfIT_090030200	795.262	-0.603759	1.61137	0.107099	0.998817
PfIT_110009100	11.9272	1.34595	-1.61069	0.107246	0.998817
PfIT_130050400	465.123	-0.63525	1.60951	0.107504	0.998817
PfIT_030006800	1027.17	-0.62227	1.60932	0.107546	0.998817
PfIT_140043100	12.1224	1.03751	-1.60757	0.107929	0.998817
PfIT_090035900	51.5963	0.828156	-1.60688	0.108081	0.998817
PfIT_090014100	2058.77	-0.553243	1.60569	0.108341	0.998817
PfIT_100023400	113.21	0.731277	-1.60419	0.108671	0.998817
PfIT_090037800	1468.5	-0.554519	1.60229	0.109091	0.998817
PfIT_140024100	1860.08	-0.702191	1.60165	0.109233	0.998817
PfIT_130036900	45.7648	1.12612	-1.60052	0.109484	0.998817
PfIT_100023800	298.1	0.887057	-1.59988	0.109625	0.998817
PfIT_140032300	565.064	-0.75872	1.59836	0.109962	0.998817
PfIT_090031300	194.71	0.538166	-1.59718	0.110225	0.998817
PfIT_130060200	95.9094	0.564492	-1.59479	0.110759	0.998817
PfIT_120018300	1669.84	-0.5943	1.59334	0.111085	0.998817
PfIT_100032400	1308.39	-0.584437	1.5926	0.11125	0.998817
PfIT_090032400	827.424	-0.62328	1.59175	0.111441	0.998817
PfIT_130049000	3667.34	-0.604596	1.58971	0.1119	0.998817
PfIT_090028400	2452.67	-0.510331	1.58415	0.11316	0.998817
PfIT_050037600	2.72867	2.34854	-1.58369	0.113265	0.998817
PfIT_070021600	384.306	-0.559704	1.58353	0.113302	0.998817
PfIT_030023000	8002.77	-0.519805	1.58211	0.113625	0.998817
PfIT_070008000	43.5214	-0.70141	1.58138	0.113791	0.998817
PfIT_010015100	131.467	0.470442	-1.58003	0.114101	0.998817
PfIT_020013600	16.4306	0.800022	-1.57667	0.11487	0.998817
PfIT_020008500	3729.63	-0.624984	1.57405	0.115476	0.998817
PfIT_030008100	631.504	-0.655739	1.57377	0.115542	0.998817
PfIT_040019900	951.183	-0.53018	1.57297	0.115727	0.998817
PfIT_140021400	947.439	-0.641027	1.56945	0.116543	0.998817
PfIT_060031600	819.693	-0.590511	1.5693	0.116579	0.998817
PfIT_090007100	1703.24	-0.583638	1.56802	0.116877	0.998817
PfIT_050031700	1208.03	-0.631744	1.56574	0.11741	0.998817
PfIT_110019700	1330.43	-0.594919	1.564	0.117817	0.998817
PfIT_070032300	14.5901	1.24949	-1.56347	0.117943	0.998817
PfIT_080033600	41.1968	1.12229	-1.55956	0.118865	0.998817
PfIT_010013700	3141.19	-0.54417	1.55953	0.118871	0.998817
PfIT_130009900:snoRNA	52.1409	-0.897376	1.55945	0.118889	0.998817
PfIT_030024900	298.878	-0.608251	1.55909	0.118975	0.998817
PfIT_090038800	79.7244	0.655386	-1.55904	0.118986	0.998817
PfIT_110019600	975.527	-0.682068	1.55843	0.11913	0.998817
PfIT_140043300	160.835	-0.552762	1.55723	0.119417	0.998817
PfIT_060007000	24.6698	1.19121	-1.55666	0.119552	0.998817
PfIT_130039400	113.399	0.899989	-1.55537	0.119858	0.998817
PfIT_140067600	356.027	-0.659581	1.55517	0.119906	0.998817
PfIT_050008700	2491.82	-0.572094	1.55352	0.120299	0.998817
PfIT_040010100	8748.05	-0.558936	1.55075	0.120962	0.998817
PfIT_110020500	200.908	-0.618917	1.54953	0.121255	0.998817
PfIT_090023300	701.244	-0.644323	1.54925	0.121323	0.998817
PfIT_130077500	5.77223	1.39854	-1.54889	0.121407	0.998817
PfIT_070032400	3.74772	1.75926	-1.54808	0.121604	0.998817
PfIT_140071000	660.443	-0.505164	1.54547	0.122232	0.998817
PfIT_020019000	4.24731	1.59129	-1.54525	0.122287	0.998817
PfIT_030019900	1155.78	-0.644972	1.54503	0.122338	0.998817
PfIT_090028600	138.548	-0.488744	1.54388	0.122618	0.998817
PfIT_120010500	263.459	0.491971	-1.54319	0.122785	0.998817
PfIT_030028700	1.10003	3.53005	-1.54139	0.123221	0.998817
PfIT_100008500	6141.4	-0.568157	1.54113	0.123285	0.998817
PfIT_140052900	3132.5	-0.526763	1.54078	0.123371	0.998817
PfIT_110018000	802.045	-0.634636	1.53994	0.123575	0.998817
PfIT_130008800	56.2629	0.966606	-1.53898	0.12381	0.998817
PfIT_130076300	1252.52	-0.718686	1.53749	0.124174	0.998817
PfIT_100010200	12.9512	-0.846759	1.53707	0.124275	0.998817
PfIT_030010300	1965.73	-0.353771	1.53612	0.124509	0.998817
PfIT_040019600	60.1962	0.75097	-1.53573	0.124605	0.998817
PfIT_120029400	82960.6	-0.597763	1.53525	0.124722	0.998817
PfIT_130048900	36.6821	0.695152	-1.53507	0.124766	0.998817
PfIT_080029600	548.494	-0.545825	1.53433	0.124948	0.998817
PfIT_120016500	25.1798	0.802552	-1.53399	0.125032	0.998817
PfIT_140078600	93.1613	0.44713	-1.53243	0.125417	0.998817
PfIT_070012600	1970.89	-0.576006	1.53204	0.125513	0.998817
PfIT_030013200:snRNA	10.6743	-0.947457	1.53098	0.125775	0.998817
PfIT_020007600	17.6556	1.43611	-1.52984	0.126056	0.998817
PfIT_120010000	163.548	0.465412	-1.52974	0.126081	0.998817
PfIT_080030300	24.5684	0.879523	-1.52913	0.126232	0.998817
PfIT_080027200	153.333	0.602492	-1.52748	0.126642	0.998817
PfIT_050025600	52.9991	0.820537	-1.52658	0.126864	0.998817
PfIT_130047700	2561.84	-0.542348	1.52409	0.127486	0.998817
PfIT_060034200	12.3784	1.42643	-1.51923	0.128705	0.998817
PfIT_070018500	1257.16	-0.562479	1.51861	0.128861	0.998817
PfIT_100020100	12.1378	1.07175	-1.51697	0.129275	0.998817
PfIT_100031400	433.607	-0.554523	1.51605	0.129508	0.998817
PfIT_070009700	73.4544	0.764145	-1.51436	0.129933	0.998817
PfIT_110041300	367.838	-0.452636	1.51423	0.129968	0.998817
PfIT_100027600	7.60224	1.57552	-1.51302	0.130274	0.998817
PfIT_060013600	20.5411	0.867105	-1.50889	0.131327	0.998817
PfIT_040022500	1929.66	-0.592264	1.50673	0.131879	0.998817
PfIT_080011900	5567.46	-0.485915	1.49868	0.133956	0.998817
PfIT_090028500	484.586	-0.519037	1.49846	0.134013	0.998817
PfIT_110040100	45.0064	0.831364	-1.49836	0.134039	0.998817
PfIT_060033000	1407.11	-0.528552	1.49684	0.134434	0.998817
PfIT_130046200	3168.62	-0.498817	1.49609	0.134629	0.998817
PfIT_030014200:snoRNA	1.60396	3.24563	-1.49597	0.134662	0.998817
PfIT_070027300	2.54708	2.02937	-1.49538	0.134815	0.998817
PfIT_130033100	1069.34	-0.627523	1.49388	0.135208	0.998817
PfIT_030024700	86.7859	-0.638653	1.49266	0.135525	0.998817
PfIT_140029900	8.98253	-1.18289	1.49169	0.135781	0.998817
PfIT_130052200	42.8551	1.02508	-1.49159	0.135807	0.998817
PfIT_140071600	608.954	0.407152	-1.49079	0.136016	0.998817
PfIT_120012600	7.42246	1.19045	-1.48905	0.136474	0.998817
PfIT_110027800	794.064	-0.514235	1.48838	0.13665	0.998817
PfIT_080030800	14.4273	-0.942278	1.48734	0.136924	0.998817
PfIT_140051500	497.162	-0.64055	1.48727	0.136943	0.998817
PfIT_060006500	1182.25	-0.502302	1.4852	0.137492	0.998817
PfIT_110039400	811.214	-0.502009	1.48471	0.137621	0.998817
PfIT_050030600	16.677	1.16848	-1.48431	0.137727	0.998817
PfIT_100012000	2655.65	-0.597333	1.48298	0.13808	0.998817
PfIT_130038100	743.428	-0.715846	1.48033	0.138786	0.998817
PfIT_100033900	910.267	-0.606071	1.48029	0.138796	0.998817
PfIT_130066000	668.807	-0.42395	1.48021	0.138816	0.998817
PfIT_040010900	2118.18	-0.5907	1.47885	0.13918	0.998817
PfIT_040007800	189.235	0.528312	-1.47752	0.139537	0.998817
PfIT_110019500	1065.35	-0.579705	1.47746	0.139553	0.998817
PfIT_110037600	11.586	0.931215	-1.47737	0.139576	0.998817
PfIT_090021500	540.286	0.375403	-1.47639	0.13984	0.998817
PfIT_130037300	303.228	-0.443553	1.47616	0.139902	0.998817
PfIT_050025000	1447.15	-0.604647	1.47548	0.140084	0.998817
PfIT_110011200	64.4177	0.626184	-1.47536	0.140115	0.998817
PfIT_090026300	750.895	-0.52451	1.475	0.140212	0.998817
PfIT_140057800	333.139	-0.500143	1.4739	0.140508	0.998817
PfIT_130074600	14.7846	1.05614	-1.47317	0.140705	0.998817
PfIT_080017400	2473.7	-0.556373	1.47315	0.140711	0.998817
PfIT_130077000	3391.29	-0.563717	1.47199	0.141024	0.998817
PfIT_100014100	218.113	-0.49304	1.47172	0.141097	0.998817
PfIT_030009100	17.6937	1.24442	-1.47065	0.141385	0.998817
PfIT_100019100	361.651	-0.59575	1.46967	0.141652	0.998817
PfIT_120053100	1000.94	-0.631899	1.46916	0.14179	0.998817
PfIT_090012100	174.195	0.484952	-1.46905	0.141819	0.998817
PfIT_050033300	1941.49	-0.566028	1.46895	0.141847	0.998817
PfIT_130044700	44.9749	0.905028	-1.46607	0.142628	0.998817
PfIT_050029100	83.8322	-0.583892	1.46573	0.142723	0.998817
PfIT_130011700	229.5	-0.528439	1.46431	0.14311	0.998817
PfIT_090015000	307.372	-0.565799	1.46344	0.143346	0.998817
PfIT_020021100	1119.34	-0.557472	1.46171	0.14382	0.998817
PfIT_070006700	0.995347	3.39824	-1.4591	0.144538	0.998817
PfIT_140074600	21.6198	-0.832325	1.45875	0.144633	0.998817
PfIT_020024900	65.7661	0.650518	-1.45747	0.144985	0.998817
PfIT_060027800	3511.69	-0.55396	1.45582	0.145443	0.998817
PfIT_030007500	11.3284	1.00717	-1.45562	0.145498	0.998817
PfIT_050007100	4.152	-1.65194	1.45559	0.145506	0.998817
PfIT_130006000	189.192	-1.84006	1.45464	0.145769	0.998817
PfIT_020007700	20.9976	1.39259	-1.45428	0.145868	0.998817
PfIT_140074800	80.6705	0.791928	-1.45406	0.145929	0.998817
PfIT_020015300	23.6633	0.889358	-1.45375	0.146016	0.998817
PfIT_100033000	17.6849	-0.774196	1.45276	0.146291	0.998817
PfIT_060021000	1183.51	-0.487225	1.45161	0.146611	0.998817
PfIT_060025400	41.5047	0.622093	-1.45074	0.146852	0.998817
PfIT_140070900	6802.64	-0.437995	1.45001	0.147057	0.998817
PfIT_070026700	1620.69	-0.674716	1.44996	0.147071	0.998817
PfIT_020020200	3695.1	-0.557054	1.44951	0.147194	0.998817
PfIT_090029200	940.7	-0.494204	1.44829	0.147536	0.998817
PfIT_060031700	672.102	-0.532483	1.44676	0.147964	0.998817
PfIT_110029100	2337.5	-0.610658	1.44648	0.148044	0.998817
PfIT_050033800	571.527	-0.644579	1.4464	0.148066	0.998817
PfIT_090015200	125.607	0.477969	-1.44515	0.148416	0.998817
PfIT_120055400	1045.68	-0.49778	1.44282	0.149071	0.998817
PfIT_130041300	292.41	-0.47599	1.44036	0.149764	0.998817
PfIT_130007700	837.376	-0.593378	1.4403	0.149783	0.998817
PfIT_120047600	17.1351	0.978596	-1.43986	0.149908	0.998817
PfIT_120019600	276.927	0.561033	-1.43931	0.150061	0.998817
PfIT_090025600	26.7233	0.633416	-1.43905	0.150135	0.998817
PfIT_040019500	92.4299	0.60612	-1.43861	0.150261	0.998817
PfIT_050028400	216.086	0.523699	-1.43816	0.15039	0.998817
PfIT_080014800	183.913	-0.559179	1.43704	0.150706	0.998817
PfIT_040015600	538.85	-0.678031	1.43666	0.150816	0.998817
PfIT_080017900	23.7441	0.683738	-1.4365	0.15086	0.998817
PfIT_140014400	3845.34	-0.539991	1.43558	0.151121	0.998817
PfIT_080027800	360.09	-0.546043	1.4307	0.152516	0.998817
PfIT_050021600	117.63	0.500047	-1.43047	0.152581	0.998817
PfIT_110035900	9.24403	1.14995	-1.43024	0.152647	0.998817
PfIT_060014900	4724.8	-0.556337	1.42824	0.153224	0.998817
PfIT_140051600	2574.22	-0.575117	1.4268	0.153639	0.998817
PfIT_130072400	1131.11	-0.492165	1.42539	0.154044	0.998817
PfIT_020017000	2886.51	-0.412763	1.42479	0.154217	0.998817
PfIT_020019900	2486.58	-0.449098	1.4246	0.154272	0.998817
PfIT_110039700	1734.09	-0.610535	1.42388	0.154481	0.998817
PfIT_060020000	121.98	0.551785	-1.42385	0.154489	0.998817
PfIT_120032900	3040.08	-0.573621	1.42204	0.155016	0.998817
PfIT_130072700	1094.99	-0.51646	1.42165	0.155126	0.998817
PfIT_140012100	267.955	0.405566	-1.41979	0.155669	0.998817
PfIT_090008700	2421.32	-0.516983	1.41927	0.15582	0.998817
PfIT_130057700	486.633	-0.455994	1.41927	0.15582	0.998817
PfIT_120025700	112.453	0.38994	-1.41917	0.15585	0.998817
PfIT_090021700	231.734	0.444314	-1.41766	0.156289	0.998817
PfIT_090017600	1368.37	-0.531009	1.41604	0.156763	0.998817
PfIT_140065700	24.6543	0.890166	-1.41565	0.156877	0.998817
PfIT_110016100	166.002	0.548422	-1.41543	0.156944	0.998817
PfIT_110012600	3447.49	-0.535635	1.41516	0.157021	0.998817
PfIT_130058500	4828.66	-0.610502	1.41232	0.157854	0.998817
PfIT_140071200	2381.19	-0.570999	1.41141	0.158123	0.998817
PfIT_070011500	5.47363	1.42115	-1.41126	0.158168	0.998817
PfIT_130034700	364.938	0.470406	-1.41108	0.158221	0.998817
PfIT_130045700	1.31047	2.84617	-1.41085	0.15829	0.998817
PfIT_020012600	52.3862	0.782549	-1.4103	0.158451	0.998817
PfIT_130021900	835.189	-0.608266	1.40989	0.158571	0.998817
PfIT_010016700	1547.52	-0.530539	1.40973	0.158621	0.998817
PfIT_010009600	4270.72	-0.457581	1.40855	0.158968	0.998817
PfIT_060030700	50.6644	0.770109	-1.40824	0.159059	0.998817
PfIT_100009000	76.2149	0.567046	-1.40823	0.159063	0.998817
PfIT_060007400	50.8259	0.851973	-1.40804	0.159118	0.998817
PfIT_110008600	548.9	-0.450574	1.40791	0.159157	0.998817
PfIT_090006500	102.285	0.636233	-1.40711	0.159394	0.998817
PfIT_030026500	191.473	0.899071	-1.40704	0.159417	0.998817
PfIT_130014000	546.388	-0.590342	1.40662	0.15954	0.998817
PfIT_080017500	8068.75	-0.506363	1.40522	0.159957	0.998817
PfIT_060011700	98.8145	0.920898	-1.39998	0.161518	0.998817
PfIT_140013800	265.656	-0.447145	1.39978	0.161578	0.998817
PfIT_060010700	2571.82	-0.457371	1.39947	0.161673	0.998817
PfIT_080025300	1813.09	-0.54271	1.3984	0.161994	0.998817
PfIT_010007100	229.167	0.613149	-1.39812	0.162078	0.998817
PfIT_020022900	1351.49	-0.589674	1.39655	0.16255	0.998817
PfIT_120017500	198.363	0.395205	-1.3957	0.162806	0.998817
PfIT_130031600	1985.95	-0.483708	1.39508	0.162992	0.998817
PfIT_140059500	13.6531	1.19975	-1.39457	0.163144	0.998817
PfIT_110035000	1083.54	-0.474334	1.39192	0.163948	0.998817
PfIT_140080500	96.7611	0.651442	-1.3912	0.164164	0.998817
PfIT_130024400	558.023	-0.523068	1.39089	0.164258	0.998817
PfIT_070012800	1508.42	-0.53313	1.3901	0.164499	0.998817
PfIT_100025000	1166.48	-0.429159	1.38939	0.164715	0.998817
PfIT_040008800	25.3484	0.843093	-1.38856	0.164967	0.998817
PfIT_080011600	1531.36	-0.46445	1.38779	0.1652	0.998817
PfIT_070030000	5018.81	-0.4292	1.3858	0.165808	0.998817
PfIT_120016700	106.952	0.740691	-1.38499	0.166055	0.998817
PfIT_140051000	4.37321	1.97933	-1.38396	0.16637	0.998817
PfIT_040009800	1785.48	-0.430021	1.38335	0.166557	0.998817
PfIT_090018000	16.2648	0.759911	-1.38195	0.166986	0.998817
PfIT_120016800	2914.86	-0.482905	1.38096	0.167291	0.998817
PfIT_120036100	945.474	-0.434412	1.3809	0.167309	0.998817
PfIT_050015900	2.94844	1.68644	-1.37957	0.167721	0.998817
PfIT_070009000	1414.48	0.786363	-1.37658	0.168641	0.998817
PfIT_110010200	1752.73	-0.502232	1.37657	0.168646	0.998817
PfIT_130029500	2283.24	-0.48543	1.37646	0.168679	0.998817
PfIT_060020600	45.2949	0.557827	-1.37643	0.168687	0.998817
PfIT_070028600	285.51	-0.555848	1.37344	0.169617	0.998817
PfIT_100012400	2235.34	-0.382161	1.37321	0.169686	0.998817
PfIT_130011100	58.9937	1.00089	-1.37211	0.170029	0.998817
PfIT_140049300	6309.43	-0.473361	1.37194	0.170082	0.998817
PfIT_130008700	54.1884	-0.623771	1.37181	0.170123	0.998817
PfIT_050031300	7.27908	1.13043	-1.37084	0.170425	0.998817
PfIT_140022900	53.6862	0.784268	-1.37064	0.170487	0.998817
PfIT_080028200	3685.91	-0.476743	1.37058	0.170507	0.998817
PfIT_050006900	183.757	0.809293	-1.37054	0.170518	0.998817
PfIT_130050200	2162.52	-0.548287	1.36941	0.170872	0.998817
PfIT_080011500	12.4317	1.16061	-1.3686	0.171123	0.998817
PfIT_130067800	16.9239	1.02969	-1.36795	0.171328	0.998817
PfIT_060031100	2465.09	-0.476649	1.36764	0.171424	0.998817
PfIT_130069300	104.604	-0.557396	1.36743	0.171491	0.998817
PfIT_130023700	383.069	0.818878	-1.3673	0.17153	0.998817
PfIT_020009100	1461.11	0.62616	-1.36667	0.17173	0.998817
PfIT_030028100	15.9664	0.913903	-1.36658	0.171757	0.998817
PfIT_140052300	5218.72	-0.540158	1.36643	0.171805	0.998817
PfIT_040017000	8.1663	-1.02062	1.36393	0.172588	0.998817
PfIT_130008500	4115.44	-0.523228	1.36357	0.172704	0.998817
PfIT_090014000	1020.79	-0.51072	1.3631	0.17285	0.998817
PfIT_100036000	3023.58	-0.516086	1.36162	0.173319	0.998817
PfIT_120030400	906.048	-0.424749	1.36112	0.173476	0.998817
PfIT_060018100	100.605	0.779501	-1.36049	0.173674	0.998817
PfIT_140016300	22.8669	0.875721	-1.35942	0.174015	0.998817
PfIT_090017100	1506.26	-0.515041	1.35886	0.174192	0.998817
PfIT_140080700	744.576	-0.490227	1.35709	0.174754	0.998817
PfIT_050007500	57.1149	0.593809	-1.35693	0.174802	0.998817
PfIT_140084200	64.75	0.543521	-1.35571	0.17519	0.998817
PfIT_010010800	8257.28	-0.452473	1.35512	0.175379	0.998817
PfIT_120056800	2351.16	-0.576315	1.35394	0.175756	0.998817
PfIT_130055700	45.2897	0.547653	-1.35315	0.176009	0.998817
PfIT_010005900	8.37892	0.985868	-1.35302	0.176048	0.998817
PfIT_120023100	83.5782	-0.461407	1.35254	0.176202	0.998817
PfIT_080022100	27.2929	0.701728	-1.35228	0.176287	0.998817
PfIT_080036600	1432.45	0.748092	-1.35168	0.176477	0.998817
PfIT_060010000	7104.68	-0.492044	1.35022	0.176944	0.998817
PfIT_010005600	1.36717	-2.21498	1.35009	0.176988	0.998817
PfIT_080020200	6630.36	-0.465211	1.34894	0.177357	0.998817
PfIT_110028100	94.2066	0.764213	-1.34867	0.177442	0.998817
PfIT_110040000	13.9365	0.943146	-1.34815	0.177609	0.998817
PfIT_080025500	1134.64	-0.579088	1.34718	0.177924	0.998817
PfIT_080006500:rRNA	0.7523	2.99243	-1.34377	0.179022	0.998817
PfIT_130062000	170.332	-0.508749	1.34268	0.179376	0.998817
PfIT_070021100	2654.44	-0.454202	1.34227	0.179508	0.998817
PfIT_130068100	147.93	0.694251	-1.34173	0.179685	0.998817
PfIT_050022900	5226.25	-0.478094	1.34149	0.179761	0.998817
PfIT_110017400	60.0678	0.725975	-1.34032	0.180141	0.998817
PfIT_050023700	2309.62	-0.518993	1.34031	0.180146	0.998817
PfIT_140080000	853.76	-0.534109	1.3398	0.180312	0.998817
PfIT_070015200	129.605	0.454402	-1.33794	0.180915	0.998817
PfIT_080014700	13.037	0.981814	-1.33662	0.181347	0.998817
PfIT_130038900	2050.8	-0.487244	1.33639	0.181422	0.998817
PfIT_080007100	6231.92	-0.487736	1.33477	0.181953	0.998817
PfIT_130051400	1346.27	-0.414368	1.33335	0.182418	0.998817
PfIT_070018400	7.44796	-1.0023	1.333	0.182532	0.998817
PfIT_060011300	11.9503	1.10884	-1.33232	0.182755	0.998817
PfIT_070025600	120.325	0.564319	-1.33173	0.18295	0.998817
PfIT_080028300	2543.5	-0.424419	1.33092	0.183214	0.998817
PfIT_130065600	419.967	-0.518707	1.33008	0.183493	0.998817
PfIT_130035700	997.148	-0.451465	1.32994	0.183537	0.998817
PfIT_130073500	1662.17	-0.550012	1.32958	0.183657	0.998817
PfIT_010012700	65.8844	-0.629117	1.32948	0.18369	0.998817
PfIT_100025700	536.768	-0.431971	1.32939	0.183719	0.998817
PfIT_120008500	3573.52	-0.441902	1.32928	0.183757	0.998817
PfIT_110023600	898.399	-0.570791	1.32885	0.183898	0.998817
PfIT_070018700	71.2832	0.570806	-1.32764	0.184297	0.998817
PfIT_080025400	20.6359	0.677223	-1.32755	0.184326	0.998817
PfIT_040008400	2368.21	-0.532496	1.32664	0.184627	0.998817
PfIT_120023800	1603.12	-0.451093	1.3254	0.185037	0.998817
PfIT_140029500	2197.48	-0.503766	1.32386	0.18555	0.998817
PfIT_040008200	103.44	0.452461	-1.32298	0.185843	0.998817
PfIT_020010300	422.535	-0.507645	1.32273	0.185925	0.998817
PfIT_130061200	145.89	-0.568976	1.32253	0.185992	0.998817
PfIT_060031500	4166.49	-0.464463	1.3215	0.186335	0.998817
PfIT_110045500	156.129	1.01706	-1.3213	0.186401	0.998817
PfIT_090011300	529.689	-0.454859	1.32122	0.186427	0.998817
PfIT_040011000	300.807	-0.552951	1.3189	0.187202	0.998817
PfIT_030020600	834.144	-0.501502	1.31875	0.187251	0.998817
PfIT_060029400	63.3239	-0.620803	1.31784	0.187558	0.998817
PfIT_120038400	941.291	-0.462564	1.31774	0.18759	0.998817
PfIT_130051500	18.4856	0.669451	-1.31719	0.187776	0.998817
PfIT_110047000	98.4555	0.580618	-1.31692	0.187867	0.998817
PfIT_060023100	154.518	0.610137	-1.31638	0.188048	0.998817
PfIT_130026000	199.908	0.737453	-1.31589	0.188211	0.998817
PfIT_050022500	7811.47	-0.472931	1.31444	0.188697	0.998817
PfIT_140080400	66.2141	0.577749	-1.31397	0.188856	0.998817
PfIT_140065300	65.9091	0.485049	-1.31279	0.189254	0.998817
PfIT_100020800	2277.28	-0.553939	1.31215	0.189471	0.998817
PfIT_140017800	1612.29	-0.42206	1.31118	0.189796	0.998817
PfIT_110027300	6183.72	-0.463807	1.31045	0.190042	0.998817
PfIT_030018100	52.6929	0.494058	-1.30999	0.190198	0.998817
PfIT_130057100	165.392	-0.507742	1.30991	0.190225	0.998817
PfIT_130049900	40.7709	0.903421	-1.30973	0.190286	0.998817
PfIT_100024800	1954.67	-0.413532	1.3085	0.190705	0.998817
PfIT_010010000	3632.55	-0.476398	1.30769	0.190977	0.998817
PfIT_140056500	822.593	-0.606498	1.30751	0.191039	0.998817
PfIT_110009500	4664.21	-0.458753	1.30709	0.191181	0.998817
PfIT_020018600	6668.38	-0.38574	1.30584	0.191608	0.998817
PfIT_110039300	3176.51	-0.476911	1.30572	0.191648	0.998817
PfIT_140031600	45.0529	0.677854	-1.30443	0.192087	0.998817
PfIT_130020800	471.171	-0.471404	1.30404	0.19222	0.998817
PfIT_060028400	13146.7	-0.397486	1.30402	0.192227	0.998817
PfIT_080027600	2583.91	-0.462268	1.30275	0.192661	0.998817
PfIT_120021300	131.86	0.526599	-1.3025	0.192746	0.998817
PfIT_090012000	2660.19	-0.493677	1.30212	0.192876	0.998817
PfIT_050031200	37.271	0.698225	-1.30177	0.192995	0.998817
PfIT_110012900	51.9434	0.588782	-1.30119	0.193195	0.998817
PfIT_120009300	10325.7	-0.441229	1.29956	0.193752	0.998817
PfIT_120021700	1042.53	-0.54953	1.2993	0.193841	0.998817
PfIT_090013500	72.7018	0.553391	-1.29887	0.193988	0.998817
PfIT_100028900	5794.43	-0.482784	1.29849	0.194117	0.998817
PfIT_020020900	44.6019	0.827922	-1.29821	0.194216	0.998817
PfIT_140019500	1210.41	-0.489301	1.2979	0.194322	0.998817
PfIT_050027000	29.9372	0.784449	-1.29678	0.194707	0.998817
PfIT_100016900	1731.16	-0.476408	1.29654	0.194788	0.998817
PfIT_010015600:rRNA	21.6193	0.714013	-1.29636	0.19485	0.998817
PfIT_030029600	3.06221	-1.50259	1.29622	0.194901	0.998817
PfIT_120054400	2.68683	1.45397	-1.29611	0.194939	0.998817
PfIT_040027200	827.885	-0.539683	1.29568	0.195085	0.998817
PfIT_100008400	361.407	0.635013	-1.29474	0.195409	0.998817
PfIT_050029600	2001.07	-0.493245	1.29473	0.195413	0.998817
PfIT_050023400	77.5674	0.804981	-1.29444	0.195513	0.998817
PfIT_140055000	450.721	-0.495687	1.29311	0.195972	0.998817
PfIT_070015800	224.697	0.350168	-1.29158	0.196501	0.998817
PfIT_040022900	117.617	0.328539	-1.29052	0.196872	0.998817
PfIT_020018400	1405	-0.534424	1.28977	0.197129	0.998817
PfIT_140068000	3951.3	-0.528994	1.28894	0.19742	0.998817
PfIT_140047500	13245.6	-0.43667	1.28887	0.197444	0.998817
PfIT_070024400	476.969	-0.452567	1.28864	0.197524	0.998817
PfIT_140008200	34.8976	0.787137	-1.28859	0.197542	0.998817
PfIT_050022000	304.758	0.784285	-1.28827	0.197651	0.998817
PfIT_140057600	8958.49	-0.426006	1.28823	0.197666	0.998817
PfIT_050018100	90.6129	0.471706	-1.28622	0.198368	0.998817
PfIT_030027400	9.71283	0.870428	-1.286	0.198442	0.998817
PfIT_130063500	6581.76	-0.498337	1.28513	0.198748	0.998817
PfIT_130020300	117.306	0.464705	-1.28437	0.199013	0.998817
PfIT_140048700	1717	-0.413373	1.28423	0.199062	0.998817
PfIT_070006000	40.2472	0.615287	-1.28391	0.199174	0.998817
PfIT_120053800	107.353	0.606478	-1.28379	0.199215	0.998817
PfIT_010013500	1248.74	-0.51754	1.28121	0.200119	0.998817
PfIT_060011000	22568.7	-0.477451	1.28118	0.20013	0.998817
PfIT_060030000	47.0963	0.712762	-1.27886	0.200948	0.998817
PfIT_140059900	18.9338	0.638391	-1.27875	0.200985	0.998817
PfIT_130044600	4509.42	-0.608496	1.27873	0.200993	0.998817
PfIT_130057400	261.014	-0.418985	1.27835	0.201125	0.998817
PfIT_110020100	4320.32	-0.51485	1.2778	0.201319	0.998817
PfIT_140046800	54.2159	0.981226	-1.27656	0.201757	0.998817
PfIT_050028200	16284.4	-0.490927	1.27641	0.201811	0.998817
PfIT_130056100	8.49067	1.15112	-1.27598	0.201963	0.998817
PfIT_100041500	12.4838	0.942268	-1.27474	0.2024	0.998817
PfIT_130049700	32.4448	0.772505	-1.27362	0.202799	0.998817
PfIT_030007700	3115.3	-0.401473	1.27343	0.202864	0.998817
PfIT_130072200	9750.39	-0.442475	1.27285	0.203072	0.998817
PfIT_010013900	1529.12	-0.383627	1.27201	0.20337	0.998817
PfIT_130053600	546.576	-0.489501	1.27189	0.203413	0.998817
PfIT_110012800	142.218	0.42016	-1.27146	0.203565	0.998817
PfIT_110043000	3939.23	-0.470462	1.27064	0.203857	0.998817
PfIT_140040700	6448.1	-0.45264	1.27014	0.204034	0.998817
PfIT_020023200	1972.42	-0.5424	1.2689	0.204477	0.998817
PfIT_130062200	349.865	0.598288	-1.2688	0.204513	0.998817
PfIT_140084600	2.50376	2.22732	-1.26734	0.205035	0.998817
PfIT_140082100	10.8338	1.223	-1.26715	0.205101	0.998817
PfIT_080019200	53443.1	-0.45754	1.26653	0.205324	0.998817
PfIT_110041800	1680.77	-0.44119	1.26533	0.205753	0.998817
PfIT_110043700	7.25163	1.1337	-1.26474	0.205966	0.998817
PfIT_110022800	4730.37	-0.472051	1.26362	0.206366	0.998817
PfIT_110009600	5890.75	-0.592217	1.26316	0.206533	0.998817
PfIT_040011900	445.636	-0.532243	1.26222	0.206869	0.998817
PfIT_140065400	6817.79	-0.452466	1.26049	0.207494	0.998817
PfIT_140055700	1785.21	-0.461475	1.2601	0.207632	0.998817
PfIT_060006900	817.117	-0.4509	1.26002	0.207662	0.998817
PfIT_020018000	146.464	0.328845	-1.25992	0.207698	0.998817
PfIT_060010100	3835.71	-0.448383	1.25962	0.207806	0.998817
PfIT_090022900	938.431	-0.443578	1.25953	0.20784	0.998817
PfIT_130027100	971.938	-0.398715	1.25933	0.207913	0.998817
PfIT_060006800	317.014	-0.483147	1.25932	0.207913	0.998817
PfIT_090009900	927.111	-0.505555	1.25904	0.208015	0.998817
PfIT_100023100	6899.44	-0.395713	1.2586	0.208176	0.998817
PfIT_140038700	69.7335	0.709935	-1.25853	0.208201	0.998817
PfIT_090007000	663.065	-0.404572	1.2585	0.20821	0.998817
PfIT_080012900	2323.94	-0.439886	1.25781	0.208459	0.998817
PfIT_140028900	1423.8	-0.44876	1.25719	0.208683	0.998817
PfIT_050012800	335.085	-0.492942	1.25651	0.208931	0.998817
PfIT_020019600	391.234	-0.404235	1.25513	0.209431	0.998817
PfIT_140051400	30.9287	0.776976	-1.25447	0.209671	0.998817
PfIT_140013700	3584.83	-0.497961	1.25445	0.20968	0.998817
PfIT_140064400	1659.1	-0.454076	1.25243	0.210412	0.998817
PfIT_140035900	469.079	-0.441314	1.2506	0.211079	0.998817
PfIT_110047400	86.8437	0.906676	-1.24834	0.211906	0.998817
PfIT_060013750	8844.28	-0.470572	1.24759	0.212182	0.998817
PfIT_130069800	351.062	-0.47915	1.24726	0.212301	0.998817
PfIT_140060300	2149.37	-0.481094	1.24512	0.213086	0.998817
PfIT_090032500	197.94	-0.456102	1.24486	0.213184	0.998817
PfIT_140050500	152.275	0.56696	-1.24438	0.213358	0.998817
PfIT_020009500	1070.15	-0.479994	1.24343	0.213711	0.998817
PfIT_100008700	20.5629	0.977022	-1.24285	0.213923	0.998817
PfIT_070015100	1510.52	0.566438	-1.24267	0.213989	0.998817
PfIT_090023600	1299.05	-0.409039	1.24235	0.214107	0.998817
PfIT_120018500	31.2911	0.582103	-1.24207	0.214212	0.998817
PfIT_090009100	47.4001	0.79028	-1.24159	0.214389	0.998817
PfIT_140036800	35.2859	0.519037	-1.24156	0.214399	0.998817
PfIT_060019300	50.5039	0.675099	-1.24146	0.214437	0.998817
PfIT_100026500	5119.94	-0.506816	1.24132	0.214488	0.998817
PfIT_140075700	56.3806	0.588086	-1.24062	0.214745	0.998817
PfIT_100037000	26605	-0.348423	1.24038	0.214837	0.998817
PfIT_140078200	457.288	-0.455466	1.23931	0.215232	0.998817
PfIT_050014800	293.547	0.348895	-1.2393	0.215234	0.998817
PfIT_140062600	12.3911	0.759651	-1.23849	0.215534	0.998817
PfIT_100036500	11.0786	1.13168	-1.23839	0.215572	0.998817
PfIT_030023400	1067.88	-0.438352	1.23829	0.215607	0.998817
PfIT_120044200	135.749	-0.613559	1.23699	0.21609	0.998817
PfIT_020015600	19.6302	0.713207	-1.23675	0.216179	0.998817
PfIT_130021500	46.1534	0.753188	-1.23652	0.216266	0.998817
PfIT_140079800	10.1273	-0.868616	1.23625	0.216366	0.998817
PfIT_080035500	289.147	0.720174	-1.23388	0.217248	0.998817
PfIT_060023900	9.08443	0.969067	-1.233	0.217577	0.998817
PfIT_090039000	7.47296	1.39169	-1.23253	0.217749	0.998817
PfIT_120007100	1232.28	-0.442553	1.23116	0.218265	0.998817
PfIT_100024700	193.93	0.429971	-1.2302	0.218621	0.998817
PfIT_020016800	2893.51	-0.441146	1.22961	0.218843	0.998817
PfIT_130068400	176.902	0.366505	-1.22958	0.218855	0.998817
PfIT_080035900	1193.12	-0.503844	1.22735	0.219691	0.998817
PfIT_060006300	207.618	0.576482	-1.22732	0.219702	0.998817
PfIT_030023900	176.147	-0.376427	1.22543	0.220414	0.998817
PfIT_120028700	246.77	0.334022	-1.22483	0.220641	0.998817
PfIT_140016900	2184.66	0.324842	-1.2248	0.220649	0.998817
PfIT_120022500	4475.96	-0.479249	1.22467	0.220698	0.998817
PfIT_050029000	772.966	-0.516786	1.22376	0.221041	0.998817
PfIT_070013900	674.329	-0.375231	1.22372	0.221059	0.998817
PfIT_030017000	19.3747	0.63445	-1.22223	0.221622	0.998817
PfIT_140046700	27.8046	0.738306	-1.22199	0.221713	0.998817
PfIT_050008200	186.525	0.503795	-1.22159	0.221863	0.998817
PfIT_080026100	2913.75	-0.450102	1.22127	0.221985	0.998817
PfIT_090030500	127.841	0.444114	-1.22052	0.22227	0.998817
PfIT_140051800	4075.85	-0.44317	1.21992	0.222494	0.998817
PfIT_070027200	67.8723	0.384895	-1.2199	0.222502	0.998817
PfIT_090037700	39.6651	0.477506	-1.21985	0.22252	0.998817
PfIT_140055400	28.719	-0.682103	1.21967	0.222589	0.998817
PfIT_120042400	1241.89	-0.373882	1.21957	0.222629	0.998817
PfIT_080035400	468.749	-0.481803	1.21917	0.22278	0.998817
PfIT_100028500	24.8264	0.918738	-1.21809	0.223188	0.998817
PfIT_120053900	24084.7	-0.396308	1.21806	0.223202	0.998817
PfIT_120022800	832.734	0.374489	-1.21767	0.223349	0.998817
PfIT_070035000	303.941	-0.454658	1.21733	0.223479	0.998817
PfIT_040010800	2900.48	-0.450521	1.21719	0.223533	0.998817
PfIT_130012000	686.989	-0.432271	1.21695	0.223623	0.998817
PfIT_140049400	51.5175	0.724137	-1.21694	0.223627	0.998817
PfIT_110049100	345.84	-0.44036	1.21671	0.223716	0.998817
PfIT_020026700	12.4146	-0.814015	1.21606	0.223963	0.998817
PfIT_020024800	45.8464	-0.828028	1.21589	0.224025	0.998817
PfIT_140052100	2925.02	-0.403896	1.21529	0.224257	0.998817
PfIT_060034900	13.1202	-0.817059	1.21454	0.224541	0.998817
PfIT_090035100	1420.33	-0.327406	1.21436	0.224609	0.998817
PfIT_080016200	23753.1	-0.423853	1.21376	0.224838	0.998817
PfIT_140041900	664.461	-0.399411	1.21354	0.224924	0.998817
PfIT_130010700	16.9883	0.981898	-1.21335	0.224997	0.998817
PfIT_030013700	1658.85	-0.450654	1.21321	0.225048	0.998817
PfIT_140066300	19.5772	0.730341	-1.21316	0.22507	0.998817
PfIT_050026500	1055	0.364333	-1.21299	0.225133	0.998817
PfIT_130021200	1721.93	-0.3606	1.21255	0.225304	0.998817
PfIT_130048400	68.4645	0.839125	-1.21223	0.225424	0.998817
PfIT_040010200	297.187	-0.484024	1.2099	0.226319	0.998817
PfIT_110039200	115.489	0.566548	-1.20982	0.226346	0.998817
PfIT_050009500	52.9961	0.833194	-1.20935	0.22653	0.998817
PfIT_140067400	5.80458	1.40852	-1.20913	0.226612	0.998817
PfIT_120049500	806.007	-0.449854	1.20895	0.226683	0.998817
PfIT_100032500	1431.74	-0.455781	1.20852	0.226848	0.998817
PfIT_050023200	489.069	-0.478877	1.20783	0.227113	0.998817
PfIT_000005500:rRNA	1.21747	2.84416	-1.20778	0.22713	0.998817
PfIT_080026400	792.055	-0.453905	1.20731	0.227313	0.998817
PfIT_110040200	587.567	-0.521457	1.20718	0.227362	0.998817
PfIT_120019100	2072.14	-0.500015	1.20676	0.227524	0.998817
PfIT_130051600	6884.55	-0.417165	1.20623	0.227731	0.998817
PfIT_130067500	968.017	-0.431723	1.2062	0.227739	0.998817
PfIT_110011800	411.161	0.362847	-1.20556	0.227988	0.998817
PfIT_140016800	4419.87	-0.495263	1.20531	0.228082	0.998817
PfIT_100042400	34.6251	-0.639048	1.20521	0.228123	0.998817
PfIT_110045300	11.1115	0.908115	-1.20497	0.228216	0.998817
PfIT_020018700	230.449	-0.408229	1.20402	0.228584	0.998817
PfIT_130010800	4.82077	1.37252	-1.20311	0.228935	0.998817
PfIT_030016700	17.893	0.955607	-1.20202	0.229356	0.998817
PfIT_130060600	27.9656	-0.526588	1.20196	0.229379	0.998817
PfIT_040013800	1413.28	-0.439035	1.20172	0.229472	0.998817
PfIT_140006200	4.81184	-1.5322	1.20161	0.229515	0.998817
PfIT_040006000	1148.14	-0.456918	1.20148	0.229565	0.998817
PfIT_120012000	3803.27	-0.47921	1.20104	0.229738	0.998817
PfIT_060007700	189.187	0.699196	-1.20103	0.229739	0.998817
PfIT_080009400	835.145	-0.473609	1.20081	0.229824	0.998817
PfIT_120040400	728.767	-0.350388	1.20052	0.229938	0.998817
PfIT_120036800	680.798	-0.451103	1.19957	0.230305	0.998817
PfIT_120032100	6.72201	1.46179	-1.19932	0.230403	0.998817
PfIT_140060000	57.6039	0.622658	-1.19929	0.230417	0.998817
PfIT_120032200	529.3	-0.355681	1.19896	0.230543	0.998817
PfIT_070014100	34.4607	0.586461	-1.19837	0.230774	0.998817
PfIT_030019600	23.864	1.01798	-1.19795	0.230937	0.998817
PfIT_060034700	1777.71	-0.423282	1.19743	0.23114	0.998817
PfIT_050029200	17729.7	-0.439754	1.19659	0.231467	0.998817
PfIT_110033600	5806.73	-0.372929	1.19574	0.231797	0.998817
PfIT_130024600	1946.92	-0.442789	1.19375	0.232578	0.998817
PfIT_010011900	1479.49	-0.327541	1.19307	0.23284	0.998817
PfIT_010013000	78.3045	0.620943	-1.19199	0.233265	0.998817
PfIT_090023500	7915.95	-0.362096	1.19188	0.233308	0.998817
PfIT_010012600	243.225	-0.56539	1.19147	0.233471	0.998817
PfIT_120017000	1925.09	0.29713	-1.19089	0.233699	0.998817
PfIT_020024700	3077.58	-0.388577	1.1899	0.234084	0.998817
PfIT_070014900	212.239	0.566953	-1.18955	0.234224	0.998817
PfIT_120014900	30.5066	0.712983	-1.18946	0.234258	0.998817
PfIT_140055300	11.4012	0.939424	-1.18944	0.234267	0.998817
PfIT_090016700	228.049	0.499896	-1.18886	0.234496	0.998817
PfIT_060015400	555.929	-0.40569	1.18852	0.234628	0.998817
PfIT_100014600	2894.62	-0.377488	1.18771	0.234948	0.998817
PfIT_140064500	95.4846	-0.354034	1.18684	0.235289	0.998817
PfIT_130031700	510.724	-0.456936	1.18653	0.235415	0.998817
PfIT_140056100	551.604	-0.395481	1.18573	0.235729	0.998817
PfIT_100023200	202.304	0.662354	-1.18551	0.235818	0.998817
PfIT_060005300	10.9115	-0.847615	1.18495	0.236037	0.998817
PfIT_130071200	116.411	-0.409653	1.18459	0.23618	0.998817
PfIT_100037600	1069.29	-0.481368	1.18391	0.23645	0.998817
PfIT_060024500	32.9012	0.844006	-1.18326	0.236706	0.998817
PfIT_070030900	214.784	0.360072	-1.18315	0.23675	0.998817
PfIT_080013000	1605.47	-0.418936	1.1831	0.23677	0.998817
PfIT_040013700	3080.52	-0.484067	1.18302	0.236801	0.998817
PfIT_140044300	8164.04	-0.424713	1.18215	0.237145	0.998817
PfIT_140013200	161.209	0.826935	-1.1817	0.237326	0.998817
PfIT_090021400	20.7658	-0.597388	1.18147	0.237417	0.998817
PfIT_130028200	51.0617	0.613261	-1.18074	0.237706	0.998817
PfIT_100041100	35.5144	0.81977	-1.18047	0.237812	0.998817
PfIT_050010400	915.502	0.310324	-1.18039	0.237845	0.998817
PfIT_140063700	4202.6	-0.426533	1.18011	0.237955	0.998817
PfIT_060031800	32.4936	-0.608695	1.17935	0.23826	0.998817
PfIT_020024600	1785.21	-0.546849	1.17893	0.238426	0.998817
PfIT_140079000	176.774	0.445268	-1.17873	0.238504	0.998817
PfIT_070007400	1165.2	-0.652473	1.17723	0.239102	0.998817
PfIT_080024900	262.498	-0.404476	1.1755	0.239795	0.998817
PfIT_060032400	508.529	-0.391524	1.17486	0.240051	0.998817
PfIT_140008600	249.256	0.452084	-1.17398	0.240402	0.998817
PfIT_140067500	15.6362	0.887989	-1.17361	0.240551	0.998817
PfIT_050034200	21.6691	0.577359	-1.17221	0.241112	0.998817
PfIT_140060200	1844.5	-0.395165	1.17203	0.241184	0.998817
PfIT_100033400	7.61561	0.782879	-1.1717	0.241316	0.998817
PfIT_130042800	2123.8	0.368354	-1.17151	0.241394	0.998817
PfIT_110048800	643.781	-0.398621	1.17139	0.241441	0.998817
PfIT_110045000	697.901	-0.415573	1.17059	0.241765	0.998817
PfIT_140075600	611.021	-0.494522	1.16987	0.242052	0.998817
PfIT_050026000	527.855	0.349975	-1.16932	0.242275	0.998817
PfIT_070008400	9149.81	-0.411895	1.16904	0.242387	0.998817
PfIT_100037100	433.543	-0.433319	1.16895	0.242425	0.998817
PfIT_040008500	312.823	-0.44244	1.16833	0.242672	0.998817
PfIT_130052800	21610.9	-0.425917	1.16805	0.242786	0.998817
PfIT_030025700	2853.22	-0.33271	1.16755	0.242989	0.998817
PfIT_050035400	68.0176	0.797901	-1.167	0.24321	0.998817
PfIT_130055500	325.772	-0.461046	1.16667	0.243345	0.998817
PfIT_060033700	844.651	-0.468782	1.16398	0.244433	0.998817
PfIT_110032700	745.834	-0.49754	1.16393	0.244451	0.998817
PfIT_120053200	14.1307	0.786975	-1.16364	0.244571	0.998817
PfIT_040023800	72.504	0.798475	-1.16334	0.244692	0.998817
PfIT_120009400	766.581	-0.377613	1.16248	0.245042	0.998817
PfIT_110043300	2391.48	-0.3995	1.16247	0.245045	0.998817
PfIT_130031800	77.9068	0.54681	-1.16189	0.24528	0.998817
PfIT_140072100	74.2835	0.522492	-1.16182	0.24531	0.998817
PfIT_140027300	152.353	0.456737	-1.16159	0.2454	0.998817
PfIT_140061900	502.022	-0.420996	1.16125	0.245542	0.998817
PfIT_110027400	10799.6	-0.387405	1.16119	0.245563	0.998817
PfIT_000007700	23.5018	0.670396	-1.16093	0.24567	0.998817
PfIT_130030100	334.806	0.397751	-1.16079	0.245726	0.998817
PfIT_110050300	8.69096	-0.773328	1.1607	0.245764	0.998817
PfIT_040024000	7672.24	-0.385081	1.16056	0.245821	0.998817
PfIT_070020500	3463.05	-0.48048	1.16052	0.245837	0.998817
PfIT_050015800:tRNA	1.00031	2.50017	-1.16006	0.246026	0.998817
PfIT_090030300	297.446	0.37697	-1.16002	0.246041	0.998817
PfIT_050016900	1369.5	-0.322799	1.15976	0.246147	0.998817
PfIT_110017800	2584.32	-0.359458	1.15954	0.246237	0.998817
PfIT_140015900	131.772	0.714843	-1.15951	0.246247	0.998817
PfIT_040010000	95.1479	-0.393872	1.15902	0.246449	0.998817
PfIT_030007800	280.872	-0.38857	1.15884	0.24652	0.998817
PfIT_100041900	55.0541	-0.58015	1.15857	0.246631	0.998817
PfIT_140070400	43.9309	0.63819	-1.15847	0.24667	0.998817
PfIT_140011100	942.202	-0.469513	1.15832	0.246734	0.998817
PfIT_100015200	193.336	-0.463185	1.1568	0.247356	0.998817
PfIT_040014600	1246.14	-0.468803	1.15617	0.247613	0.998817
PfIT_140047900	175.59	0.394833	-1.1559	0.247721	0.998817
PfIT_050020100	368.459	-0.472453	1.15574	0.247787	0.998817
PfIT_130070000	1335.98	-0.45598	1.15568	0.247813	0.998817
PfIT_140058700	8.57891	1.23669	-1.15558	0.247851	0.998817
PfIT_130009000	7.24499	1.15299	-1.15459	0.248257	0.998817
PfIT_140019100	799.281	-0.53537	1.15422	0.248409	0.998817
PfIT_110025100	21.67	0.866038	-1.15389	0.248546	0.998817
PfIT_070013700	20670.8	-0.425105	1.15361	0.24866	0.998817
PfIT_140023800	7684.76	-0.34266	1.15357	0.248677	0.998817
PfIT_050024000	5.03466	-1.12514	1.15353	0.248692	0.998817
PfIT_110019200	139.673	0.536919	-1.15341	0.248741	0.998817
PfIT_040028200	187.126	-0.472469	1.15322	0.248821	0.998817
PfIT_130069500	1979.68	-0.363986	1.15304	0.248894	0.998817
PfIT_100007000	44.9363	0.721201	-1.15282	0.248983	0.998817
PfIT_130044800	14.8387	0.78729	-1.15258	0.249082	0.998817
PfIT_010007800	13819.2	-0.32256	1.15148	0.249536	0.998817
PfIT_030026600	2099.02	-0.323329	1.15107	0.249703	0.998817
PfIT_050008600	73.9848	0.726538	-1.1509	0.249772	0.998817
PfIT_100011100	127.474	0.542128	-1.15045	0.24996	0.998817
PfIT_120035000	580.666	0.29095	-1.15035	0.250001	0.998817
PfIT_110022100	457.236	0.372885	-1.14995	0.250163	0.998817
PfIT_110045700	2.8581	1.51275	-1.14974	0.250252	0.998817
PfIT_110016900	214.515	-0.377409	1.14946	0.250364	0.998817
PfIT_090012500	1578.63	-0.43078	1.14941	0.250389	0.998817
PfIT_080023700	2134.93	-0.377587	1.14931	0.250427	0.998817
PfIT_110011400	213.769	0.502593	-1.14892	0.25059	0.998817
PfIT_040024500	2362.26	-0.407017	1.14785	0.251029	0.998817
PfIT_050014500	283.583	-0.599755	1.14778	0.251059	0.998817
PfIT_120019400	187.979	0.563685	-1.14674	0.251489	0.998817
PfIT_080026200	398.415	-0.391905	1.14575	0.251899	0.998817
PfIT_130011800	26.6486	0.757047	-1.14504	0.252194	0.998817
PfIT_140046200	65.2331	0.738492	-1.1449	0.252249	0.998817
PfIT_090018300	259.832	0.483616	-1.14405	0.252604	0.998817
PfIT_140076300	15.3884	0.893284	-1.1439	0.252663	0.998817
PfIT_140015300	2603.04	0.310156	-1.14375	0.252729	0.998817
PfIT_110021000	5734.64	-0.446931	1.14343	0.252861	0.998817
PfIT_110047500	1282.76	-0.425046	1.14281	0.253119	0.998817
PfIT_070016200	131.464	-0.398768	1.14261	0.253202	0.998817
PfIT_120047100	4120.7	-0.441079	1.14238	0.253297	0.998817
PfIT_090019300	996.469	-0.397638	1.14222	0.253365	0.998817
PfIT_070029200	287.986	0.445778	-1.14219	0.253373	0.998817
PfIT_070022400	146.172	0.690131	-1.14214	0.253398	0.998817
PfIT_120041000	1070.77	-0.563916	1.14116	0.253805	0.998817
PfIT_140074500	465.842	-0.520625	1.14065	0.254017	0.998817
PfIT_120011900	58.8005	0.60961	-1.14026	0.254178	0.998817
PfIT_140033100	1128.01	-0.295355	1.13962	0.254444	0.998817
PfIT_110046600	1142.01	-0.39667	1.13954	0.254477	0.998817
PfIT_120038800	863.88	-0.297928	1.1395	0.254494	0.998817
PfIT_130012400	212.332	0.361653	-1.13896	0.25472	0.998817
PfIT_080015500	7231.43	-0.325264	1.13865	0.254848	0.998817
PfIT_090031000	153.419	0.624362	-1.13761	0.255285	0.998817
PfIT_070019200:tRNA	0.859693	-3.25602	1.13757	0.255301	0.998817
PfIT_020017600	1291.74	-0.428873	1.13628	0.255839	0.998817
PfIT_130019800	254.245	-0.36914	1.13608	0.255921	0.998817
PfIT_030010200	59.9027	-0.408007	1.13525	0.256271	0.998817
PfIT_010009300	131.391	0.697338	-1.13511	0.256329	0.998817
PfIT_130018900	21.5944	0.768618	-1.13473	0.256491	0.998817
PfIT_120018700	17.1556	0.69128	-1.13458	0.256552	0.998817
PfIT_140054200	195.203	0.583445	-1.13452	0.256578	0.998817
PfIT_110033800	145.004	0.592563	-1.13438	0.256634	0.998817
PfIT_040026400	2.2081	-1.85686	1.13406	0.256769	0.998817
PfIT_130065800	123.222	0.440642	-1.13381	0.256875	0.998817
PfIT_130072900	758.809	-0.479721	1.13287	0.257268	0.998817
PfIT_090026100	910.431	-0.392996	1.13283	0.257284	0.998817
PfIT_030018800	126.527	0.539698	-1.13115	0.257992	0.998817
PfIT_140057900	126.574	-0.497399	1.13056	0.258239	0.998817
PfIT_130059200	660.409	-0.385175	1.13029	0.258353	0.998817
PfIT_120023700	1565.99	-0.392594	1.13021	0.258389	0.998817
PfIT_120026800	66.5925	0.519776	-1.13014	0.258417	0.998817
PfIT_090009200	83.6028	0.465748	-1.12976	0.258576	0.998817
PfIT_120017300	3863.35	-0.380943	1.12954	0.258668	0.998817
PfIT_080012000	57.8645	0.396506	-1.12945	0.258708	0.998817
PfIT_120044700	145.82	0.809536	-1.12887	0.258954	0.998817
PfIT_050008000	53.2501	0.586494	-1.12833	0.259181	0.998817
PfIT_040023100	1805.24	-0.405731	1.1277	0.259447	0.998817
PfIT_110052000	458.657	-0.40653	1.12736	0.259592	0.998817
PfIT_030007400	50.1787	0.901024	-1.12699	0.259748	0.998817
PfIT_140027200	6.35663	0.90934	-1.12682	0.259818	0.998817
PfIT_100038500	60.8586	0.849423	-1.1267	0.259868	0.998817
PfIT_120050800	66.8559	0.782021	-1.12661	0.259908	0.998817
PfIT_040012500	202.585	0.405533	-1.12616	0.260099	0.998817
PfIT_130064700	1226.9	-0.381914	1.126	0.260167	0.998817
PfIT_090021300	2830.94	-0.48126	1.12461	0.260756	0.998817
PfIT_070008600	1516.78	-0.423595	1.1243	0.260886	0.998817
PfIT_050016400	110.716	0.410519	-1.12416	0.260944	0.998817
PfIT_130062800	164.705	0.534581	-1.12378	0.261106	0.998817
PfIT_090038300	124.671	0.474368	-1.12355	0.261206	0.998817
PfIT_050033100	1249.98	-0.452529	1.12349	0.261229	0.998817
PfIT_040016700	60.1994	-0.409643	1.12303	0.261425	0.998817
PfIT_110007000	206.923	-0.593687	1.12284	0.261504	0.998817
PfIT_080016100	632.529	0.297631	-1.12255	0.261628	0.998817
PfIT_110024200	1780.12	-0.340664	1.12136	0.262136	0.998817
PfIT_050026800	47.9929	0.475025	-1.12113	0.262233	0.998817
PfIT_010012900	643.092	-0.439652	1.12072	0.262409	0.998817
PfIT_100042900	1837.93	-0.609359	1.12015	0.262651	0.998817
PfIT_130059800	648.845	-0.41772	1.12012	0.262663	0.998817
PfIT_140048800	480.316	0.522204	-1.11991	0.262754	0.998817
PfIT_030022500	2149.21	0.30314	-1.119	0.263139	0.998817
PfIT_100043000	13.8734	-1.28446	1.11893	0.263169	0.998817
PfIT_100013800	714.468	-0.381321	1.11862	0.2633	0.998817
PfIT_090011500	32.4373	-0.558971	1.1177	0.263695	0.998817
PfIT_110013300	878.292	-0.34466	1.11705	0.263974	0.998817
PfIT_140006300	0.994045	2.38313	-1.11589	0.264469	0.998817
PfIT_090025300	3479.48	-0.375571	1.11583	0.264495	0.998817
PfIT_010008350	108.622	0.427016	-1.11509	0.264813	0.998817
PfIT_130008400	75.5217	0.481846	-1.11483	0.264922	0.998817
PfIT_060022700	57.0422	0.887378	-1.11477	0.264949	0.998817
PfIT_060010500	2865.95	-0.39657	1.11411	0.265234	0.998817
PfIT_140013100	21.3275	-0.829625	1.11407	0.265248	0.998817
PfIT_140061500	186.352	-0.371058	1.1135	0.265492	0.998817
PfIT_080011700	312.403	0.449363	-1.11301	0.265703	0.998817
PfIT_030028500	3189.27	-0.412665	1.11281	0.265792	0.998817
PfIT_060034600	31.9606	0.527858	-1.11137	0.266408	0.998817
PfIT_140026400	8397.41	-0.377139	1.11107	0.266538	0.998817
PfIT_100026200	594.628	-0.366691	1.11084	0.266637	0.998817
PfIT_050025100	63.9867	0.398089	-1.11079	0.266657	0.998817
PfIT_060032500	116.259	0.350227	-1.11073	0.266687	0.998817
PfIT_110042500	132.713	0.798864	-1.1107	0.266695	0.998817
PfIT_040010700	450.303	-0.317397	1.11039	0.266832	0.998817
PfIT_090035300	174.147	0.309962	-1.11019	0.266919	0.998817
PfIT_140073200	562.971	-0.336088	1.1094	0.267256	0.998817
PfIT_080021800	13.6503	-0.707614	1.10839	0.267694	0.998817
PfIT_030017100	281.08	0.325332	-1.10818	0.267782	0.998817
PfIT_070029700:rRNA	202.536	-0.683287	1.10742	0.268112	0.998817
PfIT_080033300	42.3169	0.774734	-1.10666	0.268443	0.998817
PfIT_080030000	186.388	0.373143	-1.10648	0.268521	0.998817
PfIT_140009900	4.85476	1.25804	-1.10594	0.268752	0.998817
PfIT_140074900	8.40148	1.11515	-1.10591	0.268765	0.998817
PfIT_050011200	308.9	-0.340276	1.10581	0.268807	0.998817
PfIT_130049200	449.39	-0.463169	1.10516	0.269088	0.998817
PfIT_120023600	573.98	-0.430812	1.10445	0.269399	0.998817
PfIT_080023200	8737.32	-0.315658	1.10426	0.269479	0.998817
PfIT_130022900	322.645	0.541655	-1.10399	0.269597	0.998817
PfIT_130063000	6.23755	0.970992	-1.10389	0.26964	0.998817
PfIT_100010900	6716.79	-0.358399	1.10344	0.269837	0.998817
PfIT_080017800	23.3972	-0.791409	1.10343	0.269838	0.998817
PfIT_140024900	28.8282	0.537615	-1.10306	0.270002	0.998817
PfIT_090035800	7261.06	-0.432607	1.10275	0.270135	0.998817
PfIT_110038500	1607.68	-0.403757	1.10215	0.270396	0.998817
PfIT_060017100	140.829	-0.379061	1.10177	0.27056	0.998817
PfIT_060015600	191.635	0.665951	-1.10162	0.270629	0.998817
PfIT_140073100	767.436	-0.444556	1.10121	0.270807	0.998817
PfIT_110025800	12.7374	0.746052	-1.10079	0.270986	0.998817
PfIT_120055200	1067.32	-0.40138	1.10065	0.271049	0.998817
PfIT_120031800	1568.41	-0.394618	1.10051	0.271111	0.998817
PfIT_060009500	32.7631	0.835733	-1.1003	0.271203	0.998817
PfIT_130034800	8458.88	-0.331716	1.10028	0.27121	0.998817
PfIT_080021300	116.823	0.636586	-1.09939	0.271596	0.998817
PfIT_130016600	1103.81	-0.364923	1.09937	0.271605	0.998817
PfIT_140027400	8514.91	-0.433067	1.09924	0.271662	0.998817
PfIT_140072900	76.7977	0.603191	-1.0992	0.271679	0.998817
PfIT_110018800	7.92015	1.34662	-1.09784	0.272275	0.998817
PfIT_130018200	4157.93	-0.378214	1.09737	0.27248	0.998817
PfIT_060019000	377.323	-0.457856	1.09731	0.272508	0.998817
PfIT_140066000	1492.13	-0.358568	1.09709	0.272603	0.998817
PfIT_060027400	1601.16	-0.341684	1.09689	0.272688	0.998817
PfIT_090040900	167.987	-0.681082	1.09682	0.272721	0.998817
PfIT_110024500	196.707	-0.409487	1.09681	0.272724	0.998817
PfIT_120043700	5212.29	-0.338068	1.09638	0.272913	0.998817
PfIT_050007800	3442.5	-0.453596	1.09575	0.273188	0.998817
PfIT_030012600	585.943	0.34528	-1.09531	0.273379	0.998817
PfIT_050016700	26.5602	0.760104	-1.09524	0.273411	0.998817
PfIT_060026900	4979.06	-0.379672	1.09506	0.273489	0.998817
PfIT_130007200	2654.12	-0.404274	1.0938	0.274042	0.998817
PfIT_050018000	8.38325	0.818128	-1.09374	0.274069	0.998817
PfIT_130041000	125.045	0.662442	-1.09304	0.274375	0.998817
PfIT_070018300	3727.2	-0.281262	1.09294	0.274421	0.998817
PfIT_060016800	103.21	-0.415514	1.09231	0.274698	0.998817
PfIT_120007800	129.68	0.657375	-1.09183	0.274909	0.998817
PfIT_020018100	59.4501	0.586794	-1.09149	0.275058	0.998817
PfIT_100011600	105.178	0.368061	-1.09092	0.27531	0.998817
PfIT_130051900	16.5844	1.05708	-1.09082	0.275351	0.998817
PfIT_080007700	1121.84	-0.433498	1.08996	0.275729	0.998817
PfIT_080034400	32.221	0.740952	-1.0888	0.276243	0.998817
PfIT_110018400	6.28462	-1.16576	1.08876	0.276259	0.998817
PfIT_110017500	1834.62	-0.341765	1.08801	0.276589	0.998817
PfIT_140014600	1039.74	-0.39253	1.08791	0.276635	0.998817
PfIT_140011900	101.379	0.43355	-1.08723	0.276937	0.998817
PfIT_140033500	8372.96	-0.372741	1.08698	0.277046	0.998817
PfIT_120006900	37.4463	-0.588749	1.0864	0.277303	0.998817
PfIT_110032500	1602.25	-0.349559	1.08605	0.277455	0.998817
PfIT_070027100	11.6076	0.772183	-1.08511	0.277875	0.998817
PfIT_120023000	921.107	-0.339593	1.08509	0.277882	0.998817
PfIT_070007300	1400.68	-0.598062	1.08428	0.27824	0.998817
PfIT_130075300:tRNA	2.97226	-1.43227	1.08397	0.278379	0.998817
PfIT_140031200:snoRNA	1.45104	-2.4836	1.08331	0.278671	0.998817
PfIT_110026000	900.882	-0.40436	1.08315	0.278742	0.998817
PfIT_060025300	124.171	-0.542896	1.08304	0.278789	0.998817
PfIT_080032500	172.659	0.658833	-1.08251	0.279027	0.998817
PfIT_090031700	32.8622	0.498237	-1.08244	0.279057	0.998817
PfIT_060023600	313.075	0.500448	-1.08221	0.279161	0.998817
PfIT_100040700	245.274	0.647134	-1.08194	0.279277	0.998817
PfIT_120028500	15070.6	-0.319172	1.08166	0.279404	0.998817
PfIT_050025800	2018.21	-0.382475	1.08142	0.279509	0.998817
PfIT_110022000	8904.9	-0.386802	1.08111	0.27965	0.998817
PfIT_030014000	504.259	0.267736	-1.08101	0.279694	0.998817
PfIT_090019700	555.024	-0.364025	1.08024	0.280035	0.998817
PfIT_100018900	422.307	0.649519	-1.08007	0.280111	0.998817
PfIT_120050100	3437.13	-0.385669	1.08006	0.280114	0.998817
PfIT_080005400	2.22018	2.0078	-1.07929	0.280458	0.998817
PfIT_130026500	132.444	-0.424515	1.07856	0.280783	0.998817
PfIT_100031600	92.0581	0.594563	-1.07835	0.280878	0.998817
PfIT_110050400	53.9414	-0.413066	1.07813	0.280976	0.998817
PfIT_140062100	102.191	0.760099	-1.0776	0.281214	0.998817
PfIT_080022900	1212.16	-0.295263	1.07759	0.281216	0.998817
PfIT_020009000	922.171	-0.31161	1.07701	0.281475	0.998817
PfIT_070022000	5043.17	-0.411909	1.07693	0.28151	0.998817
PfIT_020007500	23.1109	0.883543	-1.07692	0.281514	0.998817
PfIT_110027700	4659.64	-0.410056	1.0769	0.281524	0.998817
PfIT_050009700	80.6569	0.722585	-1.07677	0.281581	0.998817
PfIT_140062500	1.81132	1.99815	-1.07668	0.281624	0.998817
PfIT_050013800	470.164	-0.448028	1.07644	0.28173	0.998817
PfIT_050007900	25.0892	-0.644956	1.07597	0.281942	0.998817
PfIT_090026900	148.019	0.39747	-1.07528	0.282248	0.998817
PfIT_130056500	107.248	0.279722	-1.07516	0.282304	0.998817
PfIT_100029200	1136.77	-0.348781	1.0751	0.282328	0.998817
PfIT_130052600	38.4243	0.444785	-1.0749	0.282421	0.998817
PfIT_060011200	37.89	0.66319	-1.07389	0.282873	0.998817
PfIT_110018200	69.7856	0.467334	-1.0729	0.283314	0.998817
PfIT_080035100	2599.1	-0.371639	1.07275	0.283383	0.998817
PfIT_080028100	701.556	-0.395577	1.07234	0.283568	0.998817
PfIT_030019100	3.78339	1.54052	-1.07186	0.283785	0.998817
PfIT_090012800	93.3835	0.5812	-1.0718	0.283811	0.998817
PfIT_120051000	474.813	-0.345528	1.07021	0.284526	0.998817
PfIT_060031300	3387.34	-0.511038	1.07007	0.284588	0.998817
PfIT_090027100	2157.89	-0.414563	1.06962	0.284792	0.998817
PfIT_040029200	1541.51	-0.460642	1.06778	0.285621	0.998817
PfIT_120016600	829.651	-0.391403	1.06764	0.285682	0.998817
PfIT_130056600	13.5523	0.933699	-1.06738	0.285801	0.998817
PfIT_060014800	6176.18	-0.374002	1.06724	0.285862	0.998817
PfIT_110047600	1715.69	-0.313711	1.06706	0.285944	0.998817
PfIT_130013500	948.542	0.383324	-1.06584	0.286496	0.998817
PfIT_020023240	2.81677	1.28872	-1.06583	0.286501	0.998817
PfIT_040009900	252.888	0.419673	-1.06437	0.287163	0.998817
PfIT_060023700	341.716	-0.416354	1.06405	0.287305	0.998817
PfIT_090010200	40.1113	0.893638	-1.06376	0.287438	0.998817
PfIT_120027000	3683.29	-0.387969	1.06317	0.287704	0.998817
PfIT_110025900	7121.4	-0.323124	1.06294	0.287809	0.998817
PfIT_140060800	1882.6	-0.366263	1.06221	0.288142	0.998817
PfIT_040013100	97.3158	0.76735	-1.06194	0.288264	0.998817
PfIT_120009800	6933.35	-0.393015	1.06184	0.288309	0.998817
PfIT_110052100	196.351	0.604304	-1.0616	0.288416	0.998817
PfIT_120035100	28.7817	0.62944	-1.06155	0.288438	0.998817
PfIT_130025900	2132.27	-0.396055	1.06135	0.288529	0.998817
PfIT_110030900	244.275	-0.486254	1.06131	0.288549	0.998817
PfIT_050034600	268.373	-0.393058	1.06104	0.288671	0.998817
PfIT_120048800	58.6587	0.501984	-1.06097	0.288702	0.998817
PfIT_110013000	2791.6	-0.315617	1.06004	0.289127	0.998817
PfIT_120058600	9.08589	0.767606	-1.05994	0.289172	0.998817
PfIT_110022400	151.9	-0.433119	1.05966	0.289298	0.998817
PfIT_050006800	18214.6	0.359816	-1.05951	0.289365	0.998817
PfIT_140063400	1269.59	-0.322964	1.05878	0.289701	0.998817
PfIT_100014500	8.78127	-0.846322	1.05856	0.2898	0.998817
PfIT_120016300	16.9809	0.842044	-1.05837	0.289886	0.998817
PfIT_130070500	355.945	-0.363494	1.05772	0.290181	0.998817
PfIT_080019700	12.8577	-0.652658	1.05757	0.290252	0.998817
PfIT_130060700	280.765	-0.471008	1.05725	0.290396	0.998817
PfIT_110029500	69.4222	0.513943	-1.05619	0.290881	0.998817
PfIT_140059800	206.846	0.307493	-1.05614	0.290903	0.998817
PfIT_090017000	439.221	-0.341726	1.05555	0.291173	0.998817
PfIT_050012400	395.123	0.396291	-1.05493	0.291456	0.998817
PfIT_100007600	192.998	0.438798	-1.05428	0.291756	0.998817
PfIT_060033900	52.4536	0.331988	-1.05388	0.291937	0.998817
PfIT_110006900	200.426	-0.319586	1.05348	0.292122	0.998817
PfIT_070028300	4665.25	-0.358226	1.05092	0.293294	0.998817
PfIT_140068800	1764.05	-0.348245	1.05034	0.29356	0.998817
PfIT_130055200	10.6029	0.670384	-1.05022	0.293618	0.998817
PfIT_060029100	132.411	0.689343	-1.04983	0.293795	0.998817
PfIT_050032000	1685.52	-0.373934	1.04848	0.294419	0.998817
PfIT_140075400	131.5	-0.354045	1.04789	0.29469	0.998817
PfIT_100007200	116.46	0.674086	-1.04786	0.294705	0.998817
PfIT_070017700	712.324	-0.353746	1.04749	0.294875	0.998817
PfIT_140006100	12.3676	-0.647237	1.04702	0.29509	0.998817
PfIT_120013200	78.7003	-0.496382	1.04673	0.295226	0.998817
PfIT_100013900	289.952	-0.34273	1.04658	0.295293	0.998817
PfIT_110022500	601.871	-0.399089	1.04631	0.295417	0.998817
PfIT_100029400	36.5238	0.555289	-1.04592	0.295596	0.998817
PfIT_060009800	443.696	0.514023	-1.04529	0.29589	0.998817
PfIT_130048100	361.543	-0.432553	1.04522	0.295921	0.998817
PfIT_120024900	1566.2	-0.289143	1.04518	0.295938	0.998817
PfIT_130047200	481.982	-0.356547	1.0451	0.295978	0.998817
PfIT_130024300	19.209	-0.59412	1.04429	0.29635	0.998817
PfIT_140042300	5.09742	0.842418	-1.04394	0.296512	0.998817
PfIT_090029300	7.83799	-0.74706	1.04289	0.296998	0.998817
PfIT_060017800	550.536	0.755253	-1.04283	0.297025	0.998817
PfIT_140072600	4062.36	-0.302967	1.04234	0.297256	0.998817
PfIT_120011600	10332.1	-0.372349	1.04229	0.297277	0.998817
PfIT_080018000	1614.74	-0.342611	1.04223	0.297306	0.998817
PfIT_060025600	106.745	0.358988	-1.04177	0.297517	0.998817
PfIT_140026600	271.513	-0.46515	1.04019	0.298252	0.998817
PfIT_030021300	68.0961	0.735839	-1.0392	0.298711	0.998817
PfIT_020012900	1498.28	-0.340332	1.03906	0.298777	0.998817
PfIT_110015700	74.2185	-0.355159	1.03826	0.29915	0.998817
PfIT_030027900	455.893	0.37587	-1.03824	0.299157	0.998817
PfIT_140037600	2698.84	-0.34068	1.03779	0.299368	0.998817
PfIT_030006700	7.24875	1.44269	-1.03773	0.299394	0.998817
PfIT_050015400	585.386	0.258106	-1.03692	0.299772	0.998817
PfIT_120055900	214.035	0.30525	-1.03647	0.299984	0.998817
PfIT_090021900	41.156	0.683477	-1.03643	0.300002	0.998817
PfIT_120053400	626.348	-0.42708	1.03502	0.30066	0.998817
PfIT_090041000	22084.8	-0.37155	1.03459	0.30086	0.998817
PfIT_100009900	8.15708	0.810889	-1.03431	0.300991	0.998817
PfIT_100006800	16.6819	0.769532	-1.03414	0.301071	0.998817
PfIT_030014800	27.0805	0.837085	-1.03364	0.301303	0.998817
PfIT_120033100	15.9901	0.689321	-1.0335	0.301371	0.998817
PfIT_050030100	1119.47	-0.387502	1.03309	0.301564	0.998817
PfIT_130069900	50.5454	0.71368	-1.03299	0.301607	0.998817
PfIT_080006800	1126.13	-0.373014	1.03262	0.301781	0.998817
PfIT_130046800	43.9797	0.521537	-1.03173	0.302196	0.998817
PfIT_040028800	58.2156	0.502423	-1.03161	0.302256	0.998817
PfIT_130039200	29.7156	0.722369	-1.03144	0.302334	0.998817
PfIT_140016500	724.88	-0.331325	1.03133	0.302385	0.998817
PfIT_060013700	8.69872	1.00957	-1.03081	0.302628	0.998817
PfIT_140041200	207.176	-0.494541	1.03027	0.302883	0.998817
PfIT_120017900	1437.38	-0.417842	1.03026	0.302889	0.998817
PfIT_120031900	147.297	0.315118	-1.0298	0.303102	0.998817
PfIT_080035300	12333.6	-0.390344	1.02967	0.303164	0.998817
PfIT_090008800	669.299	0.243194	-1.02965	0.303177	0.998817
PfIT_130077600	0.791129	-3.10167	1.0295	0.303246	0.998817
PfIT_010012300	66.5846	-0.347479	1.02874	0.303603	0.998817
PfIT_120018400:snRNA	14.1823	-0.765364	1.0285	0.303713	0.998817
PfIT_070006300	0.783598	3.05389	-1.02836	0.303781	0.998817
PfIT_140050700	425.032	-0.284741	1.02761	0.304132	0.998817
PfIT_040029300	3312.57	-0.380672	1.02663	0.304597	0.998817
PfIT_050036900	79.5967	-0.45615	1.02655	0.304632	0.998817
PfIT_140021900	69.6164	-0.477519	1.02628	0.30476	0.998817
PfIT_060008700	24.7545	0.511741	-1.02546	0.305145	0.998817
PfIT_140069200	61479.3	-0.444963	1.02543	0.30516	0.998817
PfIT_050021900	2325.06	-0.309654	1.02531	0.305219	0.998817
PfIT_040020600	608.744	0.321012	-1.02529	0.305226	0.998817
PfIT_100040500	69.4963	0.573662	-1.02514	0.305299	0.998817
PfIT_070025400	365.058	-0.286982	1.02514	0.305299	0.998817
PfIT_070018000	194.379	-0.320497	1.025	0.305364	0.998817
PfIT_050028000	930.41	-0.429215	1.02481	0.305452	0.998817
PfIT_060030800	7.12547	-0.87256	1.02438	0.305654	0.998817
PfIT_060028500	27.6232	0.770665	-1.02428	0.305701	0.998817
PfIT_110008100	319.707	-0.379626	1.02372	0.305967	0.998817
PfIT_000023800	52.6899	-0.396864	1.02353	0.306056	0.998817
PfIT_090022500	20482.3	-0.346584	1.02349	0.306077	0.998817
PfIT_020006600	3867.21	-0.500622	1.02239	0.306595	0.998817
PfIT_080030200	18.5029	0.915376	-1.02179	0.306883	0.998817
PfIT_050017300	95.013	0.417981	-1.02165	0.306946	0.998817
PfIT_120033000	323.119	0.343297	-1.02065	0.30742	0.998817
PfIT_020023800	77.7972	0.386777	-1.02019	0.307637	0.998817
PfIT_080030500	3685.47	-0.345795	1.01925	0.308084	0.998817
PfIT_080015900	105.019	0.645879	-1.01924	0.308091	0.998817
PfIT_130018400	10.6828	0.843434	-1.01922	0.308096	0.998817
PfIT_110036600	1143.87	-0.312467	1.01873	0.308329	0.998817
PfIT_010017200	116.737	-0.474471	1.01855	0.308415	0.998817
PfIT_070010200	371.469	0.641281	-1.0177	0.308819	0.998817
PfIT_130020700	3567.46	-0.331729	1.01732	0.308999	0.998817
PfIT_140043800	110.93	0.472219	-1.01596	0.309647	0.998817
PfIT_130025600	41.524	0.544306	-1.0156	0.309821	0.998817
PfIT_080010000	637.053	-0.321662	1.01518	0.310019	0.998817
PfIT_120008300	1100.66	-0.378	1.01479	0.310206	0.998817
PfIT_110010800	26.3487	0.692022	-1.01418	0.310498	0.998817
PfIT_100031100	3579.39	-0.409278	1.01409	0.310539	0.998817
PfIT_080037200	0.767288	3.02479	-1.01325	0.310942	0.998817
PfIT_020013800	995.836	-0.36649	1.013	0.311058	0.998817
PfIT_130051100	665.692	-0.291402	1.01292	0.311099	0.998817
PfIT_060030900	5120.33	-0.335757	1.01146	0.311797	0.998817
PfIT_080022400	44.0468	0.574912	-1.01143	0.311813	0.998817
PfIT_130026700	139.887	-0.327745	1.01101	0.312013	0.998817
PfIT_090021000	355.84	0.244997	-1.01097	0.31203	0.998817
PfIT_120054600	40.2519	0.643142	-1.01081	0.312109	0.998817
PfIT_120049600:snRNA	37.5258	-0.621121	1.01041	0.3123	0.998817
PfIT_140066800	738.979	-0.336645	1.01015	0.312424	0.998817
PfIT_130038500	304.769	0.433924	-1.01003	0.312479	0.998817
PfIT_130075600	13398.6	-0.508358	1.01	0.312493	0.998817
PfIT_020015500	4103.1	-0.323613	1.00947	0.312749	0.998817
PfIT_120032800	2182.3	-0.301403	1.00932	0.31282	0.998817
PfIT_120029900	103.735	0.41832	-1.0093	0.312829	0.998817
PfIT_140018000	96.2296	0.696042	-1.00911	0.312921	0.998817
PfIT_030028800	0.597831	-2.73914	1.00827	0.313326	0.998817
PfIT_070019600	35.6492	0.779089	-1.00827	0.313326	0.998817
PfIT_030013000	2367.24	-0.337519	1.0079	0.313504	0.998817
PfIT_070013800	258.681	-0.412628	1.00787	0.313517	0.998817
PfIT_130053000	1353.56	-0.36849	1.00569	0.314564	0.998817
PfIT_140021800	263.995	-0.450308	1.00554	0.314636	0.998817
PfIT_120012100	5326.54	-0.344944	1.00517	0.314813	0.998817
PfIT_140012600	222.116	0.312014	-1.0051	0.314847	0.998817
PfIT_020010600	95.7063	0.54959	-1.00455	0.315114	0.998817
PfIT_110038800	1743.56	-0.319542	1.00393	0.315415	0.998817
PfIT_130029400	62.8906	0.577817	-1.0035	0.31562	0.998817
PfIT_040014300	37.4795	-0.557461	1.00307	0.315829	0.998817
PfIT_130018500	5.89542	0.813832	-1.00236	0.31617	0.998817
PfIT_110037300	64.172	-0.404725	1.00215	0.316271	0.998817
PfIT_120045400	0.730022	-3.02151	1.00212	0.316288	0.998817
PfIT_070020100	83.6683	0.71282	-1.00211	0.316291	0.998817
PfIT_140067300	30.926	0.675707	-1.0009	0.316874	0.998817
PfIT_090024900	142.003	0.347316	-1.00082	0.316914	0.998817
PfIT_070028800	181.524	0.535181	-1.00038	0.317128	0.998817
PfIT_040019800	811.968	-0.340273	0.999974	0.317323	0.998817
PfIT_140017200	8196.43	-0.374689	0.999735	0.317439	0.998817
PfIT_030014100	1237.65	-0.458107	0.999021	0.317785	0.998817
PfIT_120052500	339.633	0.252028	-0.998922	0.317833	0.998817
PfIT_090036900	377.415	0.489967	-0.998866	0.31786	0.998817
PfIT_050029700	71.4245	-0.402367	0.9983	0.318134	0.998817
PfIT_110024100	435.23	-0.329012	0.998149	0.318207	0.998817
PfIT_110025500	13.2384	-0.785719	0.998008	0.318275	0.998817
PfIT_060029500	40.2849	0.404478	-0.997596	0.318475	0.998817
PfIT_110011300	677.029	0.260053	-0.997503	0.318521	0.998817
PfIT_140065500	35.9994	0.436262	-0.997275	0.318631	0.998817
PfIT_100041000	3495.82	-0.448435	0.997126	0.318704	0.998817
PfIT_050028100	70.6948	0.416545	-0.997115	0.318709	0.998817
PfIT_140060400	580.38	-0.424805	0.997094	0.318719	0.998817
PfIT_060016600	402.188	0.251078	-0.996781	0.318871	0.998817
PfIT_120044300	9.73626	0.717591	-0.996287	0.31911	0.998817
PfIT_120030700	2751.71	-0.341881	0.996125	0.319189	0.998817
PfIT_040021200	1539.9	-0.312985	0.995624	0.319433	0.998817
PfIT_080033200	385.849	0.261179	-0.995348	0.319567	0.998817
PfIT_140036200	3268.86	-0.330834	0.994969	0.319751	0.998817
PfIT_100020500	2667.76	-0.337184	0.993569	0.320433	0.998817
PfIT_120057900	903.815	-0.422339	0.992904	0.320757	0.998817
PfIT_140056900	49.3895	0.636595	-0.992225	0.321088	0.998817
PfIT_050035200	579.63	-0.373286	0.991353	0.321513	0.998817
PfIT_040009700	805.344	-0.367743	0.990995	0.321688	0.998817
PfIT_030021600	4072.59	-0.352117	0.990541	0.32191	0.998817
PfIT_050023800	155.07	0.512033	-0.98992	0.322213	0.998817
PfIT_140082700	97.2788	-0.463273	0.989515	0.322411	0.998817
PfIT_130036800	103.988	0.537399	-0.987363	0.323465	0.998817
PfIT_100037400	651.573	-0.353442	0.986976	0.323654	0.998817
PfIT_090023100	81.4591	0.429121	-0.986383	0.323945	0.998817
PfIT_070022500	11.6301	-0.693921	0.986216	0.324027	0.998817
PfIT_130025000	20.895	0.607584	-0.985427	0.324414	0.998817
PfIT_110014500	348.086	-0.297849	0.985299	0.324477	0.998817
PfIT_140041600	78.3823	0.548487	-0.984125	0.325054	0.998817
PfIT_070033400	1149.28	-0.347325	0.983724	0.325251	0.998817
PfIT_000006900	8.02588	0.999828	-0.982293	0.325956	0.998817
PfIT_030010900	638.673	-0.32583	0.981798	0.326199	0.998817
PfIT_050033900	605.02	-0.335758	0.98175	0.326223	0.998817
PfIT_140049800	179.317	0.542912	-0.981744	0.326226	0.998817
PfIT_130062900	190.773	0.380199	-0.981282	0.326454	0.998817
PfIT_120010700	21.0093	0.759567	-0.979939	0.327116	0.998817
PfIT_140057300	17.3929	0.871487	-0.97952	0.327323	0.998817
PfIT_030025900	142.177	0.594372	-0.978224	0.327963	0.998817
PfIT_140069000	6.79916	0.850596	-0.977736	0.328205	0.998817
PfIT_070021300	27.2836	0.700555	-0.977561	0.328291	0.998817
PfIT_110040900	2812.02	-0.327199	0.97686	0.328639	0.998817
PfIT_030024200	219.926	0.686053	-0.976805	0.328665	0.998817
PfIT_110012100	242.88	0.308884	-0.976604	0.328765	0.998817
PfIT_140064900	208.037	0.539398	-0.976301	0.328915	0.998817
PfIT_090033800	3004.91	-0.347107	0.976227	0.328952	0.998817
PfIT_030026900	1493.92	-0.343356	0.976137	0.328996	0.998817
PfIT_140009200:snoRNA	13.2585	0.695415	-0.976036	0.329047	0.998817
PfIT_140083800	8.01464	-1.32264	0.976021	0.329054	0.998817
PfIT_050008100	55.3155	0.398537	-0.974914	0.329603	0.998817
PfIT_010009400	344.439	-0.310789	0.974627	0.329745	0.998817
PfIT_120020500	32.2076	0.613193	-0.973666	0.330223	0.998817
PfIT_140064100	2829.28	-0.354887	0.973661	0.330225	0.998817
PfIT_110030000	553.009	-0.367191	0.973417	0.330346	0.998817
PfIT_020021800	249.402	-0.30078	0.973349	0.33038	0.998817
PfIT_120047400	15.3126	0.567136	-0.972692	0.330706	0.998817
PfIT_140051900	167.465	-0.418035	0.972671	0.330717	0.998817
PfIT_130054100	19.8184	0.739274	-0.972601	0.330752	0.998817
PfIT_130049800	24.2644	0.771074	-0.972194	0.330954	0.998817
PfIT_120006300	695.421	0.418923	-0.972085	0.331008	0.998817
PfIT_060029200	764.174	-0.391878	0.972009	0.331046	0.998817
PfIT_130069700	1175.67	-0.279061	0.971272	0.331413	0.998817
PfIT_070015400	50.5156	0.419764	-0.970708	0.331694	0.998817
PfIT_120053500	34.116	-0.434874	0.970228	0.331933	0.998817
PfIT_060012600	1293.73	-0.27492	0.969756	0.332168	0.998817
PfIT_080012700	6045.07	-0.335476	0.969617	0.332237	0.998817
PfIT_080024500	57.7185	-0.482686	0.969252	0.332419	0.998817
PfIT_110031400	610.163	-0.381994	0.96924	0.332425	0.998817
PfIT_110014300	3923.95	-0.395971	0.968148	0.33297	0.998817
PfIT_140067700	1285.2	-0.34706	0.967474	0.333307	0.998817
PfIT_080010200	33.3136	-0.464949	0.967043	0.333523	0.998817
PfIT_140011400	6560.92	-0.321355	0.966552	0.333768	0.998817
PfIT_060026600	5424.7	-0.34873	0.966194	0.333947	0.998817
PfIT_140034300	1679.17	-0.258841	0.966094	0.333997	0.998817
PfIT_130008300	20.3388	0.667942	-0.965718	0.334185	0.998817
PfIT_070009800	125.417	0.516184	-0.965168	0.334461	0.998817
PfIT_140077200	379.51	-0.33979	0.96473	0.33468	0.998817
PfIT_130020600	31.8688	0.747836	-0.964581	0.334755	0.998817
PfIT_070031400	29.4814	0.749704	-0.964574	0.334758	0.998817
PfIT_140054700	1188.35	0.219965	-0.96444	0.334825	0.998817
PfIT_030007600	272.105	-0.307244	0.963583	0.335255	0.998817
PfIT_130059700	8717.95	-0.348312	0.963412	0.335341	0.998817
PfIT_110051900	997.347	-0.451821	0.963033	0.335531	0.998817
PfIT_040018700	203.166	0.476283	-0.962712	0.335692	0.998817
PfIT_110022600	6623.31	-0.349251	0.962651	0.335723	0.998817
PfIT_100040600	27894.4	-0.321882	0.962008	0.336045	0.998817
PfIT_140039000	238.006	0.266914	-0.961914	0.336093	0.998817
PfIT_080013800	13.0784	-0.666295	0.96148	0.336311	0.998817
PfIT_050026600	112.171	0.353588	-0.961426	0.336338	0.998817
PfIT_100010100	13.9529	-0.582769	0.961353	0.336375	0.998817
PfIT_130029600	321.973	0.392335	-0.961341	0.33638	0.998817
PfIT_090027300	1097.64	0.245677	-0.960484	0.336811	0.998817
PfIT_090020000	22125.9	-0.37318	0.960299	0.336905	0.998817
PfIT_110045100	43.8527	0.732823	-0.959834	0.337139	0.998817
PfIT_020016500	47.2882	0.515659	-0.959761	0.337175	0.998817
PfIT_140055900	231.576	-0.378516	0.959566	0.337274	0.998817
PfIT_140043500	8.77254	0.870105	-0.959537	0.337288	0.998817
PfIT_070017600	9.98835	0.677166	-0.959407	0.337354	0.998817
PfIT_020024000	47.076	0.611288	-0.959108	0.337504	0.998817
PfIT_090031200	624.835	0.345945	-0.958829	0.337645	0.998817
PfIT_020014400	2724.96	-0.37612	0.958347	0.337888	0.998817
PfIT_140038300	33.235	0.525288	-0.958303	0.33791	0.998817
PfIT_140056200	212.23	-0.346292	0.958064	0.338031	0.998817
PfIT_130013900	146.571	0.705039	-0.957895	0.338115	0.998817
PfIT_050036300	12.5197	0.596071	-0.956832	0.338652	0.998817
PfIT_110044800	73.3509	0.405289	-0.956715	0.338711	0.998817
PfIT_120058500	10.6086	-0.599138	0.956709	0.338714	0.998817
PfIT_080008400	5009.03	-0.353644	0.956102	0.339021	0.998817
PfIT_090037300	25.8408	0.771027	-0.956098	0.339023	0.998817
PfIT_040019700	5207.78	-0.299426	0.955782	0.339182	0.998817
PfIT_120024400	2318.75	-0.300221	0.955336	0.339408	0.998817
PfIT_110014400	46.8524	-0.350488	0.955316	0.339418	0.998817
PfIT_130014400	3190.19	-0.292683	0.954834	0.339661	0.998817
PfIT_140081800	1382.62	-0.361812	0.954672	0.339744	0.998817
PfIT_140034200	293.849	-0.368482	0.954367	0.339898	0.998817
PfIT_140040200	128.931	0.595491	-0.954068	0.340049	0.998817
PfIT_090037600	1265.05	-0.303626	0.953587	0.340293	0.998817
PfIT_120036500	156.744	-0.328828	0.953314	0.340431	0.998817
PfIT_140054500	43.5621	-0.469684	0.953101	0.340539	0.998817
PfIT_010014000	162.875	0.293109	-0.953071	0.340554	0.998817
PfIT_130039700	3.75655	1.16232	-0.952987	0.340597	0.998817
PfIT_010017700	0.704691	2.90729	-0.952982	0.340599	0.998817
PfIT_130027600	182.467	0.589225	-0.952879	0.340652	0.998817
PfIT_110017100	33.8862	0.414291	-0.95259	0.340798	0.998817
PfIT_120042300	855.313	-0.360251	0.95233	0.340929	0.998817
PfIT_070034900	14619.6	-0.38817	0.952244	0.340973	0.998817
PfIT_060023800	25.897	-0.565801	0.95211	0.341041	0.998817
PfIT_030019400	342.59	0.251746	-0.95186	0.341168	0.998817
PfIT_140043700	70.0918	0.61303	-0.951165	0.341521	0.998817
PfIT_030007200	582.901	-0.355988	0.950727	0.341743	0.998817
PfIT_100006900	261.68	0.301855	-0.949768	0.34223	0.998817
PfIT_070028200	87.5628	0.348159	-0.949308	0.342464	0.998817
PfIT_140076500	182.007	-0.462822	0.949057	0.342592	0.998817
PfIT_140064300	1010.94	0.264327	-0.949024	0.342608	0.998817
PfIT_030027100	125.482	0.460759	-0.948941	0.342651	0.998817
PfIT_040013600	23.7312	0.546715	-0.948669	0.342789	0.998817
PfIT_100012300	12.5491	0.772274	-0.947511	0.343379	0.998817
PfIT_020023000	826.956	-0.399093	0.947224	0.343525	0.998817
PfIT_080009000	97.9022	-0.406184	0.947103	0.343586	0.998817
PfIT_140043400	1476.23	-0.333474	0.946624	0.34383	0.998817
PfIT_070030400	7726.6	-0.265493	0.946363	0.343964	0.998817
PfIT_060021700	3653.53	-0.286312	0.945402	0.344454	0.998817
PfIT_050009300	371.225	0.471471	-0.945184	0.344565	0.998817
PfIT_140044200	283.182	-0.406164	0.944951	0.344684	0.998817
PfIT_090023900	160.038	0.646929	-0.944908	0.344706	0.998817
PfIT_110035700	48.5878	0.611	-0.944551	0.344888	0.998817
PfIT_120007000	375.069	0.417593	-0.944509	0.344909	0.998817
PfIT_050030200	34.789	-0.492906	0.944388	0.344971	0.998817
PfIT_100013500	62.0839	0.475198	-0.943917	0.345212	0.998817
PfIT_110012300	1992.42	-0.312971	0.943817	0.345263	0.998817
PfIT_090036300	120.713	0.333123	-0.943495	0.345428	0.998817
PfIT_140032200	134.49	0.52053	-0.943392	0.34548	0.998817
PfIT_140049100	116.377	0.670429	-0.943338	0.345508	0.998817
PfIT_090034100	2.67103	1.44575	-0.943063	0.345649	0.998817
PfIT_140045700	142.482	0.330517	-0.942576	0.345898	0.998817
PfIT_100034900	30.1474	0.463284	-0.941582	0.346406	0.998817
PfIT_130022600	294.213	0.352264	-0.940972	0.346719	0.998817
PfIT_100035800	12.465	0.581799	-0.940507	0.346957	0.998817
PfIT_080034300	104.964	0.599648	-0.939759	0.347341	0.998817
PfIT_130040100	153.2	0.424115	-0.939486	0.347481	0.998817
PfIT_140051300	3.57733	-1.01779	0.93918	0.347638	0.998817
PfIT_050026900	113.387	-0.353746	0.939008	0.347727	0.998817
PfIT_110010600	1151.99	-0.309662	0.938959	0.347752	0.998817
PfIT_110041900	105.886	0.340019	-0.938573	0.34795	0.998817
PfIT_040023900	232.266	-0.309107	0.938479	0.347998	0.998817
PfIT_140053800	139.751	0.559117	-0.938319	0.34808	0.998817
PfIT_110040500	334.055	0.632507	-0.937602	0.348449	0.998817
PfIT_060026100	1600.75	-0.403854	0.937442	0.348531	0.998817
PfIT_130060000	360.929	0.355613	-0.937367	0.34857	0.998817
PfIT_050023300	132.276	0.34439	-0.937342	0.348583	0.998817
PfIT_020009800	43.7173	0.545246	-0.9372	0.348656	0.998817
PfIT_050006100	9.1971	0.883208	-0.937128	0.348693	0.998817
PfIT_140035300	185.384	0.618001	-0.936802	0.34886	0.998817
PfIT_090026600	14064.6	-0.324215	0.936258	0.34914	0.998817
PfIT_080033000	43.0014	0.502169	-0.93596	0.349294	0.998817
PfIT_090030400	5096.39	-0.259684	0.935827	0.349362	0.998817
PfIT_130053300	25.9434	0.585141	-0.935063	0.349756	0.998817
PfIT_020023900	440.789	-0.333685	0.934582	0.350004	0.998817
PfIT_020021000	75.0788	0.546363	-0.934308	0.350145	0.998817
PfIT_110039600	8.68871	0.912936	-0.934282	0.350159	0.998817
PfIT_140066900	114.222	0.513059	-0.934013	0.350297	0.998817
PfIT_070033500	48.4345	0.603255	-0.933622	0.350499	0.998817
PfIT_130017300	121.148	0.684242	-0.933119	0.350758	0.998817
PfIT_070009200	1145.86	0.6373	-0.933052	0.350793	0.998817
PfIT_120006600	1878.78	-0.653423	0.93278	0.350934	0.998817
PfIT_020020100	457.647	-0.313877	0.932198	0.351234	0.998817
PfIT_120055000	1321.43	-0.253059	0.931592	0.351547	0.998817
PfIT_120043300	20.0376	0.653032	-0.931572	0.351558	0.998817
PfIT_130070400	94.2164	0.413489	-0.931513	0.351588	0.998817
PfIT_140022500	321.944	-0.370564	0.931376	0.351659	0.998817
PfIT_110018600	937.349	-0.349806	0.931098	0.351803	0.998817
PfIT_140012800	16020	-0.303706	0.930648	0.352036	0.998817
PfIT_110008900	972.212	-0.322422	0.930517	0.352103	0.998817
PfIT_110048400	54.5096	0.506273	-0.930512	0.352106	0.998817
PfIT_140084900	438.553	1.15449	-0.930271	0.352231	0.998817
PfIT_120051500	1356.21	-0.333932	0.930228	0.352253	0.998817
PfIT_050021800	186.275	0.323826	-0.930209	0.352263	0.998817
PfIT_140042500	602.951	0.294296	-0.930079	0.35233	0.998817
PfIT_140039700	74.5366	-0.361578	0.929915	0.352415	0.998817
PfIT_140079100	176.55	-0.398347	0.92989	0.352428	0.998817
PfIT_140077000	104.118	0.590561	-0.929721	0.352516	0.998817
PfIT_070033200	1647.36	-0.317624	0.929421	0.352671	0.998817
PfIT_080019300	1156.02	-0.346225	0.929067	0.352854	0.998817
PfIT_110037700	2683.88	-0.352695	0.928973	0.352903	0.998817
PfIT_020025100	506.164	-0.308888	0.928276	0.353264	0.998817
PfIT_070029300	927.769	-0.315238	0.928026	0.353394	0.998817
PfIT_140016700	16.6496	0.532997	-0.927951	0.353433	0.998817
PfIT_030026800	8936.66	-0.334876	0.927563	0.353634	0.998817
PfIT_130070800	116.339	0.461974	-0.927202	0.353822	0.998817
PfIT_070007100	958.998	-0.344701	0.927119	0.353865	0.998817
PfIT_100024300	44.5116	0.526585	-0.926763	0.35405	0.998817
PfIT_050012200	6.9708	0.934486	-0.926643	0.354112	0.998817
PfIT_140010600	11.0874	0.860766	-0.926186	0.354349	0.998817
PfIT_110020700	495.893	-0.328534	0.925569	0.35467	0.998817
PfIT_090025900	7.63739	0.892409	-0.925493	0.354709	0.998817
PfIT_130020900	142.533	0.306596	-0.925448	0.354733	0.998817
PfIT_120052300	264.429	0.237491	-0.925328	0.354795	0.998817
PfIT_050024900	3750.76	-0.330046	0.925017	0.354957	0.998817
PfIT_060009700	12.459	-0.583266	0.924741	0.355101	0.998817
PfIT_130014100	827.559	-0.346368	0.924471	0.355241	0.998817
PfIT_030025500	134.961	0.610871	-0.924256	0.355353	0.998817
PfIT_130073200	4.28094	0.869804	-0.923914	0.355531	0.998817
PfIT_060015700	1292.72	-0.363624	0.923899	0.355539	0.998817
PfIT_130015700	135.309	-0.392122	0.9238	0.35559	0.998817
PfIT_140044500	1017.34	-0.320654	0.923731	0.355626	0.998817
PfIT_040009100	554.058	0.318775	-0.923314	0.355844	0.998817
PfIT_060010600	3989.79	-0.283575	0.923276	0.355864	0.998817
PfIT_110010700	69.3287	0.429963	-0.922683	0.356172	0.998817
PfIT_140017300	60.1845	0.643006	-0.921957	0.356551	0.998817
PfIT_050006600	574.166	-0.470231	0.921916	0.356573	0.998817
PfIT_130022300	1349.85	-0.293282	0.921072	0.357013	0.998817
PfIT_070028100	1622.16	-0.313371	0.921042	0.357029	0.998817
PfIT_060023400	36.4214	0.502747	-0.920695	0.35721	0.998817
PfIT_090009000	30.6394	0.459953	-0.920418	0.357354	0.998817
PfIT_130047100	34.2321	-0.479713	0.920381	0.357373	0.998817
PfIT_040011800	369.805	-0.311258	0.920063	0.35754	0.998817
PfIT_040020700	107.64	0.511197	-0.919883	0.357634	0.998817
PfIT_130066400	8455.52	-0.293224	0.919568	0.357798	0.998817
PfIT_060016700	262.954	0.453324	-0.919534	0.357817	0.998817
PfIT_020009400	92.0341	0.398985	-0.919273	0.357953	0.998817
PfIT_080025600	14.9622	0.768943	-0.91911	0.358038	0.998817
PfIT_120034900	101.55	0.427879	-0.91808	0.358577	0.998817
PfIT_050030700	546.933	0.314111	-0.917852	0.358696	0.998817
PfIT_110038900	316.968	0.545174	-0.917783	0.358732	0.998817
PfIT_130076900	29.4344	0.506181	-0.917752	0.358749	0.998817
PfIT_000006600	457.981	-0.415511	0.917127	0.359076	0.998817
PfIT_130030400	6765.67	-0.332258	0.916944	0.359172	0.998817
PfIT_050013900	2979.15	-0.324136	0.916934	0.359177	0.998817
PfIT_050021300	158.212	0.419053	-0.916865	0.359213	0.998817
PfIT_090018900	875.932	0.300874	-0.916683	0.359309	0.998817
PfIT_120016200:snoRNA	1.74833	1.53317	-0.916573	0.359367	0.998817
PfIT_130054500	3662.68	-0.344648	0.915285	0.360042	0.998817
PfIT_120024500	46.7669	-0.547127	0.91369	0.36088	0.998817
PfIT_090019500	404.416	0.214483	-0.913191	0.361142	0.998817
PfIT_080025000	3225.29	-0.300399	0.91132	0.362127	0.998817
PfIT_140073600	146.578	0.42978	-0.910938	0.362328	0.998817
PfIT_040027400	13.3226	-0.542637	0.910744	0.36243	0.998817
PfIT_130043300	119.651	0.469813	-0.909737	0.362961	0.998817
PfIT_120011500	46.8619	0.438943	-0.90929	0.363197	0.998817
PfIT_120034600	329.218	0.42839	-0.909092	0.363302	0.998817
PfIT_130043000	114.124	0.500014	-0.908824	0.363443	0.998817
PfIT_140046500	79.5916	0.758429	-0.908743	0.363486	0.998817
PfIT_100033300	434.836	-0.369653	0.908344	0.363696	0.998817
PfIT_070026500	1482.36	-0.268153	0.908241	0.363751	0.998817
PfIT_130007100	1348.85	-0.389646	0.907998	0.363879	0.998817
PfIT_050006500	4490.3	-0.327822	0.907325	0.364235	0.998817
PfIT_140027100	4236.67	-0.321915	0.906841	0.364491	0.998817
PfIT_100014900	181.581	0.285268	-0.906626	0.364605	0.998817
PfIT_070021900	115.901	0.616049	-0.906147	0.364858	0.998817
PfIT_120030500	375.913	-0.349718	0.905778	0.365053	0.998817
PfIT_020025000	378.718	-0.304046	0.905716	0.365086	0.998817
PfIT_130069100	20.0395	0.60395	-0.905659	0.365116	0.998817
PfIT_130023400	28.756	0.598513	-0.905567	0.365165	0.998817
PfIT_010016100	28706.2	-0.424695	0.905492	0.365205	0.998817
PfIT_030021700	892.183	-0.232163	0.905481	0.36521	0.998817
PfIT_080010500	107.537	-0.314499	0.905374	0.365267	0.998817
PfIT_050020500	1053.04	0.204769	-0.905216	0.365351	0.998817
PfIT_090016500	107.748	0.443119	-0.905191	0.365364	0.998817
PfIT_090023400	2387.81	-0.322075	0.904871	0.365534	0.998817
PfIT_110041100	5329.9	-0.343309	0.904737	0.365605	0.998817
PfIT_100007300	16.0721	0.786315	-0.904089	0.365948	0.998817
PfIT_050011800	1209.78	0.407118	-0.903915	0.36604	0.998817
PfIT_140065800	781.45	-0.350937	0.903311	0.366361	0.998817
PfIT_050016200	32.9519	0.658807	-0.903093	0.366477	0.998817
PfIT_050010200	44.9956	0.601272	-0.90291	0.366574	0.998817
PfIT_080011000	77.7097	-0.320855	0.90226	0.366919	0.998817
PfIT_120052400	166.217	-0.333996	0.902228	0.366936	0.998817
PfIT_130014300	887.063	-0.25986	0.901887	0.367117	0.998817
PfIT_090017200	9.29816	0.669473	-0.901831	0.367147	0.998817
PfIT_130008600	4634.47	-0.247624	0.901024	0.367575	0.998817
PfIT_100006100	1511.1	-0.37344	0.900649	0.367775	0.998817
PfIT_100032100	8.69458	0.638189	-0.900494	0.367857	0.998817
PfIT_020016300	4048.17	-0.341454	0.900158	0.368036	0.998817
PfIT_140070800	384.209	0.445032	-0.900154	0.368038	0.998817
PfIT_100013300	145.201	0.254304	-0.899027	0.368639	0.998817
PfIT_090010500	270.345	-0.265115	0.898934	0.368688	0.998817
PfIT_020024400	389.044	0.273717	-0.898632	0.368849	0.998817
PfIT_020018500	2555.38	-0.246057	0.898243	0.369056	0.998817
PfIT_060027500	64.6596	0.466523	-0.898198	0.36908	0.998817
PfIT_100008100	17.768	0.645607	-0.898061	0.369153	0.998817
PfIT_110007300	51168.9	-0.338082	0.897931	0.369222	0.998817
PfIT_140073900	824.323	-0.414331	0.897756	0.369316	0.998817
PfIT_090008100	12986	-0.297377	0.897079	0.369677	0.998817
PfIT_030026000	46.9468	0.573996	-0.897045	0.369695	0.998817
PfIT_070021700	1927.12	-0.353932	0.89667	0.369895	0.998817
PfIT_110051700	28.8789	0.743915	-0.896454	0.370011	0.998817
PfIT_120059000	2.73614	1.07235	-0.895706	0.37041	0.998817
PfIT_090031600	18.4971	0.62146	-0.895322	0.370615	0.998817
PfIT_090013200	30.3018	0.679935	-0.894794	0.370897	0.998817
PfIT_130010600	51.6304	0.336513	-0.894602	0.371	0.998817
PfIT_130029900	47.6808	0.518066	-0.894488	0.371061	0.998817
PfIT_140021200	176.651	-0.404074	0.893905	0.371372	0.998817
PfIT_060012300	120.066	0.31226	-0.893777	0.371441	0.998817
PfIT_130050500	86.7646	0.41487	-0.892818	0.371955	0.998817
PfIT_020027600	35.6593	0.37176	-0.89265	0.372045	0.998817
PfIT_130010300	7.83795	0.731524	-0.891851	0.372473	0.998817
PfIT_020007400	176.393	0.364226	-0.890574	0.373158	0.998817
PfIT_060022500	204.872	0.267963	-0.890465	0.373216	0.998817
PfIT_120012500	6416.88	-0.29997	0.890079	0.373424	0.998817
PfIT_120035800	3500.09	-0.354392	0.889266	0.37386	0.998817
PfIT_050022400	251.998	0.595246	-0.889214	0.373888	0.998817
PfIT_050016300	181.053	0.699136	-0.888909	0.374052	0.998817
PfIT_070008100	263.444	0.552784	-0.888708	0.37416	0.998817
PfIT_140042200	10.6878	-0.559234	0.8877	0.374702	0.998817
PfIT_070029400	608.169	-0.280099	0.88769	0.374708	0.998817
PfIT_130064400	1337.97	-0.242256	0.887448	0.374838	0.998817
PfIT_040024900	16.0545	0.742691	-0.887364	0.374883	0.998817
PfIT_120022100:tRNA	30.7077	-0.421278	0.887344	0.374894	0.998817
PfIT_070026800	2735.2	-0.322597	0.887138	0.375005	0.998817
PfIT_100018700	154.315	-0.433113	0.886251	0.375482	0.998817
PfIT_030013300	208.165	-0.347079	0.885957	0.375641	0.998817
PfIT_120025400	692.112	-0.319617	0.885841	0.375703	0.998817
PfIT_050030400	436.798	0.496069	-0.885235	0.37603	0.998817
PfIT_130071800	2592.62	-0.222385	0.884997	0.376158	0.998817
PfIT_120033200	43.1118	0.502865	-0.88498	0.376167	0.998817
PfIT_130033500	216.985	0.608379	-0.884605	0.376369	0.998817
PfIT_140044800:tRNA	1.54831	-1.77941	0.884282	0.376544	0.998817
PfIT_020012400	281.148	0.691282	-0.884052	0.376668	0.998817
PfIT_130061700	113.585	0.532508	-0.883948	0.376724	0.998817
PfIT_140042600	282.478	0.514912	-0.883851	0.376777	0.998817
PfIT_100029100	5010.19	-0.301588	0.883783	0.376814	0.998817
PfIT_140022400	713.378	-0.313578	0.883764	0.376824	0.998817
PfIT_100008900	25.7162	0.703524	-0.883038	0.377215	0.998817
PfIT_130071100	5831.94	-0.32586	0.882927	0.377276	0.998817
PfIT_110028200	2100.83	-0.310847	0.882864	0.37731	0.998817
PfIT_090008000	442.149	0.646598	-0.882805	0.377342	0.998817
PfIT_120017700	77.9216	0.429595	-0.882782	0.377354	0.998817
PfIT_040011300	75.6875	0.608781	-0.88216	0.377691	0.998817
PfIT_090014900	1273.79	0.216164	-0.881644	0.377969	0.998817
PfIT_030022800	2.02407	-1.22116	0.881129	0.378248	0.998817
PfIT_140075100	2996.98	-0.31913	0.880847	0.378401	0.998817
PfIT_130026400	258.492	0.491592	-0.880595	0.378537	0.998817
PfIT_140039900	5865.54	-0.302483	0.879972	0.378875	0.998817
PfIT_140026100	1945.03	-0.253126	0.879914	0.378906	0.998817
PfIT_130016300	182.491	0.439208	-0.879564	0.379096	0.998817
PfIT_090007400	449.778	-0.439613	0.878932	0.379438	0.998817
PfIT_070013300	36433	-0.292989	0.878862	0.379476	0.998817
PfIT_140078700	12.7016	-0.48868	0.878757	0.379533	0.998817
PfIT_020005600	1.82897	-1.42952	0.878119	0.379879	0.998817
PfIT_080007000	750.075	0.272677	-0.877505	0.380212	0.998817
PfIT_040020900	43.0367	0.590746	-0.877195	0.380381	0.998817
PfIT_120028600	2066.49	0.223459	-0.876039	0.381009	0.998817
PfIT_100041400	392.855	-0.396932	0.875554	0.381272	0.998817
PfIT_130027200	778.582	-0.252179	0.875227	0.38145	0.998817
PfIT_060022300	40.9673	0.408987	-0.875045	0.381549	0.998817
PfIT_130057300	250.002	0.309492	-0.87489	0.381634	0.998817
PfIT_110029200	516.2	0.480937	-0.8736	0.382336	0.998817
PfIT_120056700	3440.17	-0.311009	0.87342	0.382434	0.998817
PfIT_040028100	2952.67	-0.282373	0.873294	0.382503	0.998817
PfIT_040016500	237.745	0.568063	-0.873284	0.382508	0.998817
PfIT_050036000	112.073	0.509446	-0.873116	0.3826	0.998817
PfIT_130017500	17.0216	0.626861	-0.872824	0.382759	0.998817
PfIT_070031500	14.2441	0.638886	-0.872076	0.383167	0.998817
PfIT_140040600	1408.73	-0.236365	0.872019	0.383198	0.998817
PfIT_030019000	22.7616	0.644879	-0.871349	0.383564	0.998817
PfIT_130016000	1045.05	-0.269117	0.871198	0.383646	0.998817
PfIT_070019700	8.75167	0.789304	-0.871103	0.383698	0.998817
PfIT_130067700	2100.36	-0.264159	0.871067	0.383718	0.998817
PfIT_110011700	163.611	0.547	-0.871061	0.383721	0.998817
PfIT_080010400	78.5173	0.573117	-0.870732	0.3839	0.998817
PfIT_080034700:rRNA	1.98268	-1.52469	0.870689	0.383924	0.998817
PfIT_140012500	3384.94	-0.293795	0.870669	0.383935	0.998817
PfIT_120056300	585.41	-0.336553	0.870256	0.38416	0.998817
PfIT_070023300	84.5169	0.311636	-0.870072	0.384261	0.998817
PfIT_120025800	73.1995	0.315675	-0.869746	0.384439	0.998817
PfIT_040005800	4.72916	0.850163	-0.869696	0.384467	0.998817
PfIT_080021000	1962.36	-0.330893	0.86944	0.384607	0.998817
PfIT_130063800	30.0658	0.485848	-0.869156	0.384762	0.998817
PfIT_130055400	3499.82	-0.293029	0.869124	0.384779	0.998817
PfIT_100019000	40.4303	0.515678	-0.868218	0.385275	0.998817
PfIT_090017900	896.995	-0.299705	0.867549	0.385641	0.998817
PfIT_130074800	1389.35	-0.283466	0.867407	0.385719	0.998817
PfIT_100013000	483.67	-0.345601	0.86711	0.385881	0.998817
PfIT_130065000	525.06	0.39045	-0.866938	0.385976	0.998817
PfIT_130028300	117.853	0.540757	-0.865365	0.386838	0.998817
PfIT_030018500	69.3214	0.70536	-0.864847	0.387123	0.998817
PfIT_120030100	19.7046	0.576194	-0.864689	0.387209	0.998817
PfIT_110023500	1413.18	-0.372983	0.864283	0.387433	0.998817
PfIT_140073300	138.124	0.268476	-0.864277	0.387436	0.998817
PfIT_070011000	96.5133	0.411287	-0.864016	0.387579	0.998817
PfIT_040029100	4685.38	-0.493475	0.863908	0.387639	0.998817
PfIT_040018300	1129.03	0.229453	-0.863882	0.387653	0.998817
PfIT_070005800	34.3494	-0.48284	0.863687	0.38776	0.998817
PfIT_010016800	34.2456	-0.385809	0.863609	0.387803	0.998817
PfIT_120010800	109.118	-0.420054	0.863507	0.387859	0.998817
PfIT_140052600	10766.2	-0.440977	0.863085	0.388091	0.998817
PfIT_130005300	19.0102	-0.517852	0.86269	0.388308	0.998817
PfIT_130012200	866.344	-0.319687	0.8626	0.388357	0.998817
PfIT_070034700	12557.1	-0.296972	0.862182	0.388587	0.998817
PfIT_130060100	2.51517	1.31902	-0.861934	0.388724	0.998817
PfIT_110017000	34.0116	0.526963	-0.861693	0.388856	0.998817
PfIT_110036700	13.9323	0.56942	-0.861258	0.389096	0.998817
PfIT_140030800:snoRNA	47.5761	0.407184	-0.860737	0.389383	0.998817
PfIT_130011900	506.7	-0.285111	0.860429	0.389552	0.998817
PfIT_110020400	541.099	0.542613	-0.860222	0.389667	0.998817
PfIT_030015800	3.99381	0.925181	-0.859877	0.389857	0.998817
PfIT_080009700	869.041	-0.31372	0.859514	0.390057	0.998817
PfIT_130017000	13631.2	-0.339363	0.859366	0.390139	0.998817
PfIT_110042000	66.4103	0.608448	-0.859336	0.390155	0.998817
PfIT_040024400	11792.9	-0.277103	0.859296	0.390177	0.998817
PfIT_090015400	21.5933	0.399375	-0.859044	0.390317	0.998817
PfIT_130058800	726.976	-0.307726	0.857971	0.390909	0.998817
PfIT_040023700	100.891	0.624039	-0.857486	0.391176	0.998817
PfIT_040021300	598.078	0.292724	-0.857174	0.391349	0.998817
PfIT_110045200	6.81333	0.76872	-0.856575	0.39168	0.998817
PfIT_090035500	10.3901	0.554884	-0.856535	0.391702	0.998817
PfIT_050037900	34.1847	0.349888	-0.85638	0.391788	0.998817
PfIT_050034100	983.189	-0.293401	0.855921	0.392041	0.998817
PfIT_130054800	1375.38	0.20619	-0.855666	0.392183	0.998817
PfIT_110049400	445.044	0.484136	-0.855578	0.392231	0.998817
PfIT_010009100	291.298	0.55962	-0.855442	0.392307	0.998817
PfIT_070034000	47.148	0.385573	-0.855177	0.392453	0.998817
PfIT_120039500	71.9701	0.659074	-0.854605	0.39277	0.998817
PfIT_140076100	62.8061	0.571769	-0.854378	0.392896	0.998817
PfIT_090027900	796.685	0.332012	-0.854248	0.392968	0.998817
PfIT_130033000	436.869	-0.261691	0.853571	0.393342	0.998817
PfIT_070009400	466.737	0.630758	-0.853003	0.393657	0.998817
PfIT_140060100	8329.08	-0.30609	0.852937	0.393694	0.998817
PfIT_010015300	69.9722	0.48164	-0.852556	0.393905	0.998817
PfIT_060013200	1296.83	-0.275972	0.852271	0.394063	0.998817
PfIT_080030100	0.82236	2.18573	-0.85223	0.394086	0.998817
PfIT_050020800	21.3609	0.519738	-0.851851	0.394297	0.998817
PfIT_040016000	304.942	0.39936	-0.851803	0.394323	0.998817
PfIT_060031200	54.8075	-0.312351	0.851329	0.394586	0.998817
PfIT_140045400	3203.38	-0.305821	0.850884	0.394834	0.998817
PfIT_100017100	2104.33	-0.306494	0.850843	0.394856	0.998817
PfIT_050033400	4390.44	-0.30265	0.850432	0.395085	0.998817
PfIT_140022600	9.81868	0.579452	-0.850404	0.3951	0.998817
PfIT_060018900	160.689	0.489431	-0.850268	0.395176	0.998817
PfIT_010007400	144.758	0.368465	-0.850236	0.395194	0.998817
PfIT_140083000	362.668	-0.295799	0.849566	0.395567	0.998817
PfIT_030019200	404.941	-0.346188	0.849095	0.395829	0.998817
PfIT_120046400	938.468	-0.327306	0.848768	0.39601	0.998817
PfIT_060023200	2064.43	-0.273369	0.848544	0.396135	0.998817
PfIT_100031200	434.129	-0.252098	0.848531	0.396142	0.998817
PfIT_140046000	64.3077	0.494967	-0.848433	0.396197	0.998817
PfIT_140044400	4959.44	-0.280367	0.848364	0.396235	0.998817
PfIT_140082300	22.8434	-0.449096	0.84836	0.396238	0.998817
PfIT_090022200	1793.5	-0.34995	0.847914	0.396486	0.998817
PfIT_130032700	122.068	0.540561	-0.847613	0.396653	0.998817
PfIT_070020700	240.262	0.221283	-0.847482	0.396727	0.998817
PfIT_080033400	52.9693	0.608972	-0.847374	0.396787	0.998817
PfIT_130029300	784.795	0.301814	-0.846698	0.397164	0.998817
PfIT_090013700	125.446	0.366557	-0.846606	0.397215	0.998817
PfIT_100019400	93.8736	0.573577	-0.846042	0.397529	0.998817
PfIT_100032600	63.0878	0.561697	-0.845929	0.397592	0.998817
PfIT_100006700	693.388	-0.2506	0.845333	0.397925	0.998817
PfIT_140034400	11.8684	0.516087	-0.845279	0.397955	0.998817
PfIT_100017700	20.5687	0.658023	-0.844844	0.398198	0.998817
PfIT_140026300	213.856	-0.24643	0.844832	0.398205	0.998817
PfIT_140025700	264.099	0.437633	-0.844801	0.398222	0.998817
PfIT_100015800	33920.3	-0.277469	0.843928	0.39871	0.998817
PfIT_140033200	2343.11	-0.289834	0.843905	0.398722	0.998817
PfIT_120042100	1755.84	-0.258656	0.843341	0.399038	0.998817
PfIT_060036600	0.623393	2.70037	-0.843212	0.39911	0.998817
PfIT_140052000	2864.5	-0.289669	0.843114	0.399165	0.998817
PfIT_100033500	2228.72	-0.25598	0.842896	0.399287	0.998817
PfIT_040029900	9.77308	-0.550111	0.842575	0.399466	0.998817
PfIT_110012000	161.41	-0.293472	0.842266	0.399639	0.998817
PfIT_020011000	203.651	0.277059	-0.842097	0.399734	0.998817
PfIT_100015500	119.563	-0.223108	0.84194	0.399822	0.998817
PfIT_140073400	255.938	0.249964	-0.841934	0.399825	0.998817
PfIT_130057800	938.748	-0.251188	0.84184	0.399878	0.998817
PfIT_120032500	709.807	-0.277052	0.841814	0.399892	0.998817
PfIT_140019700	3.63443	1.25462	-0.84108	0.400303	0.998817
PfIT_030011400	19.3728	0.566915	-0.840785	0.400468	0.998817
PfIT_060009100	1857.8	-0.281594	0.840707	0.400512	0.998817
PfIT_110047200	20.6456	0.812276	-0.840622	0.40056	0.998817
PfIT_080024800	102.301	0.45006	-0.84045	0.400656	0.998817
PfIT_140015700	463.191	0.356551	-0.840352	0.400711	0.998817
PfIT_130036200:snoRNA	5.64884	0.674946	-0.840111	0.400846	0.998817
PfIT_100010300	2558.86	-0.26881	0.840006	0.400905	0.998817
PfIT_050009900	92.7062	0.42693	-0.839809	0.401015	0.998817
PfIT_110048300	28.1912	-0.373237	0.839642	0.401109	0.998817
PfIT_130068200	25.0328	0.447224	-0.83941	0.401239	0.998817
PfIT_110042200	6.97902	0.757411	-0.839062	0.401434	0.998817
PfIT_130043600	7731.4	-0.304186	0.838798	0.401583	0.998817
PfIT_030016900	71.8672	0.62882	-0.838784	0.40159	0.998817
PfIT_130012900	1084.4	0.239837	-0.83866	0.40166	0.998817
PfIT_140076450	616.513	-0.319478	0.838494	0.401753	0.998817
PfIT_020012300	3356.79	0.680673	-0.838155	0.401944	0.998817
PfIT_050013200	183.996	0.465521	-0.83815	0.401947	0.998817
PfIT_110037500	52.4176	0.393082	-0.837772	0.402159	0.998817
PfIT_060024400	23.575	-0.502392	0.837102	0.402535	0.998817
PfIT_060016900	5772.71	-0.324171	0.837	0.402593	0.998817
PfIT_050035100	263.012	-0.246644	0.836691	0.402767	0.998817
PfIT_120045000	517.984	-0.284527	0.835851	0.403238	0.998817
PfIT_000023600:rRNA	307.739	-0.335836	0.835741	0.4033	0.998817
PfIT_080009600	1918.52	0.313238	-0.834882	0.403784	0.998817
PfIT_140085200	0.596073	-2.69926	0.834677	0.4039	0.998817
PfIT_130071600	1293.32	0.205797	-0.834294	0.404115	0.998817
PfIT_090013400	672.585	-0.257485	0.834081	0.404235	0.998817
PfIT_140058300	1969.44	-0.307655	0.832756	0.404982	0.998817
PfIT_020014500	8592.63	-0.278544	0.832681	0.405025	0.998817
PfIT_080018400	10706	-0.306655	0.832639	0.405049	0.998817
PfIT_130045900	998.641	-0.370502	0.832563	0.405091	0.998817
PfIT_110005900	0.673459	-2.86663	0.832541	0.405104	0.998817
PfIT_020013300	207.754	0.475462	-0.832535	0.405107	0.998817
PfIT_110036500	8.23223	0.706235	-0.832481	0.405137	0.998817
PfIT_110018700	18.3026	0.634202	-0.832451	0.405154	0.998817
PfIT_100011700	495.579	-0.285553	0.832399	0.405184	0.998817
PfIT_030015500	264.149	-0.24697	0.832247	0.40527	0.998817
PfIT_070011400	11897.8	-0.295757	0.832068	0.40537	0.998817
PfIT_030008200	56.8068	0.638021	-0.831722	0.405566	0.998817
PfIT_110050900	67.6636	0.448362	-0.831246	0.405835	0.998817
PfIT_140033000	65.7436	0.593484	-0.830973	0.405989	0.998817
PfIT_000009700	1.39182	-1.94738	0.830766	0.406106	0.998817
PfIT_070024200	267.873	-0.299461	0.830645	0.406174	0.998817
PfIT_110013900	2954.29	-0.319289	0.830576	0.406213	0.998817
PfIT_030026400	385.279	0.4028	-0.830525	0.406242	0.998817
PfIT_120027200	113.824	0.321361	-0.830174	0.40644	0.998817
PfIT_060027600	11337.3	-0.279657	0.829428	0.406862	0.998817
PfIT_110039750	5.68158	0.864332	-0.82883	0.407201	0.998817
PfIT_120032300	566.696	-0.28038	0.828465	0.407407	0.998817
PfIT_130007800	4032.6	-0.273768	0.828391	0.407449	0.998817
PfIT_060022800	2015.34	0.209472	-0.827307	0.408063	0.998817
PfIT_100031300	22527.3	-0.284914	0.826996	0.408239	0.998817
PfIT_090036500	29.0758	0.483255	-0.82684	0.408328	0.998817
PfIT_050021000	54.4656	-0.303825	0.826097	0.408749	0.998817
PfIT_100012800	6277.29	-0.2961	0.826092	0.408752	0.998817
PfIT_030016300	460.978	-0.248232	0.825927	0.408846	0.998817
PfIT_140049500	475.852	-0.228919	0.825588	0.409038	0.998817
PfIT_070026000	531.397	0.231734	-0.825463	0.409109	0.998817
PfIT_090020100	8.00932	0.78133	-0.825202	0.409257	0.998817
PfIT_110031000	2369.57	-0.274344	0.824385	0.409721	0.998817
PfIT_120042600	615.715	0.203801	-0.823708	0.410105	0.998817
PfIT_010011000	5.10846	0.87045	-0.82362	0.410155	0.998817
PfIT_140046600	237.016	0.595635	-0.823572	0.410183	0.998817
PfIT_100025100	81.4137	0.504362	-0.823537	0.410203	0.998817
PfIT_100022300	379.691	0.530612	-0.822229	0.410947	0.998817
PfIT_140067900	16.3788	-0.504665	0.822223	0.41095	0.998817
PfIT_120053600	13.4103	-0.478334	0.822178	0.410976	0.998817
PfIT_100025400	48.0122	0.637591	-0.821427	0.411403	0.998817
PfIT_130046000	76.8377	0.411648	-0.821162	0.411554	0.998817
PfIT_110034400	300.582	-0.293165	0.821057	0.411614	0.998817
PfIT_130010200	44.522	0.587956	-0.820777	0.411773	0.998817
PfIT_090014800	1969.35	-0.281853	0.820718	0.411807	0.998817
PfIT_060025000	1844.22	-0.388482	0.820691	0.411822	0.998817
PfIT_080007600	2017.22	-0.289098	0.819305	0.412612	0.998817
PfIT_140009700	500.252	0.509006	-0.819263	0.412636	0.998817
PfIT_070012100	142.4	0.48776	-0.818905	0.412841	0.998817
PfIT_140061000	155.127	-0.317443	0.818397	0.413131	0.998817
PfIT_060013300	187.497	-0.261665	0.817362	0.413721	0.998817
PfIT_040022600	2570.74	-0.262834	0.81693	0.413969	0.998817
PfIT_120050700	43.1782	0.390539	-0.816648	0.414129	0.998817
PfIT_140068700	3349.29	-0.245411	0.816579	0.414169	0.998817
PfIT_030010400	244.299	0.540635	-0.816203	0.414384	0.998817
PfIT_070017100	8.3847	0.513504	-0.815906	0.414554	0.998817
PfIT_140053600	3836.89	-0.271928	0.815799	0.414615	0.998817
PfIT_120040200	18013	-0.26363	0.815772	0.414631	0.998817
PfIT_100035500	1589.71	-0.245961	0.815261	0.414923	0.998817
PfIT_070009300	400.971	0.314477	-0.815143	0.41499	0.998817
PfIT_110016500	706.094	0.450776	-0.814838	0.415165	0.998817
PfIT_140047700	99.8833	0.520523	-0.813389	0.415995	0.998817
PfIT_050019300	374.18	-0.26188	0.813142	0.416137	0.998817
PfIT_140057500	28696.8	-0.350612	0.813129	0.416144	0.998817
PfIT_110040700	195.416	0.471496	-0.813127	0.416145	0.998817
PfIT_110037400	330.933	0.365259	-0.812902	0.416274	0.998817
PfIT_140014200	106.397	0.323528	-0.812448	0.416534	0.998817
PfIT_030014600	513.038	-0.287117	0.812028	0.416775	0.998817
PfIT_070014600	270.629	-0.307526	0.812022	0.416779	0.998817
PfIT_080006600	74.1904	-0.385081	0.811808	0.416902	0.998817
PfIT_110038300	42892.5	-0.330408	0.811523	0.417066	0.998817
PfIT_140045200	93.4894	0.551641	-0.811164	0.417272	0.998817
PfIT_080020100	34.7278	-0.361056	0.811156	0.417276	0.998817
PfIT_100013200	455.825	-0.308345	0.811093	0.417313	0.998817
PfIT_010011700	15410.8	-0.28307	0.810737	0.417517	0.998817
PfIT_140083300	1.22185	1.88097	-0.809843	0.41803	0.998817
PfIT_140054300	315.71	-0.31501	0.809225	0.418386	0.998817
PfIT_130030300	248.761	-0.315882	0.809158	0.418424	0.998817
PfIT_050008500	58.0266	0.311586	-0.809029	0.418499	0.998817
PfIT_130013000	43.7148	0.516194	-0.808896	0.418575	0.998817
PfIT_020022600	14.2803	0.801553	-0.80822	0.418964	0.998817
PfIT_050030300	4502.06	-0.249233	0.808215	0.418967	0.998817
PfIT_010006100	79.0351	0.521151	-0.808186	0.418983	0.998817
PfIT_050012900	770.73	0.203268	-0.807862	0.41917	0.998817
PfIT_140052400:snRNA	50.1472	-0.33722	0.807272	0.41951	0.998817
PfIT_130059500	41.5145	0.469282	-0.807191	0.419557	0.998817
PfIT_130045600	5526.21	-0.281507	0.807013	0.419659	0.998817
PfIT_030012400	74.0241	0.61927	-0.806977	0.41968	0.998817
PfIT_140075900	110.913	0.296367	-0.806501	0.419954	0.998817
PfIT_140036400	169.094	0.317725	-0.806058	0.420209	0.998817
PfIT_140023400	89.049	0.322014	-0.805727	0.420401	0.998817
PfIT_010014400	83.8919	0.643463	-0.805709	0.420411	0.998817
PfIT_120034200	12397.3	-0.307127	0.805431	0.420571	0.998817
PfIT_040021100	92.8471	-0.29354	0.8054	0.420589	0.998817
PfIT_050033200	305.181	0.236305	-0.805304	0.420644	0.998817
PfIT_100038400	138.38	0.528554	-0.804769	0.420953	0.998817
PfIT_030013600	42.8253	0.379423	-0.804687	0.421	0.998817
PfIT_060025800	2473.32	-0.266289	0.804451	0.421136	0.998817
PfIT_140036700	635.51	0.290556	-0.804299	0.421224	0.998817
PfIT_130073000	7307.94	-0.293188	0.804148	0.421312	0.998817
PfIT_050028300	740.997	-0.246295	0.803986	0.421405	0.998817
PfIT_110021500	44.6219	0.498609	-0.803836	0.421492	0.998817
PfIT_120018100	36232	-0.274607	0.803001	0.421974	0.998817
PfIT_120042000	704.993	0.315034	-0.802964	0.421996	0.998817
PfIT_050021100	45.9845	0.460187	-0.801986	0.422561	0.998817
PfIT_040007900	9680.99	-0.301942	0.801905	0.422608	0.998817
PfIT_110046500	124.501	0.443048	-0.80167	0.422744	0.998817
PfIT_140018300	204.524	-0.265962	0.80138	0.422912	0.998817
PfIT_140071700	1052.57	-0.286692	0.801372	0.422916	0.998817
PfIT_110046400	3.45526	0.844941	-0.801368	0.422918	0.998817
PfIT_090011100	20.6767	-0.4017	0.801123	0.42306	0.998817
PfIT_060021600	1730.54	-0.262295	0.800642	0.423339	0.998817
PfIT_030024100	186.446	-0.299649	0.800455	0.423447	0.998817
PfIT_140054400	2218.81	-0.260154	0.800258	0.423561	0.998817
PfIT_050015700	1003.57	0.221849	-0.799358	0.424083	0.998817
PfIT_140028400	64.6304	0.536632	-0.799236	0.424153	0.998817
PfIT_020024500	18463.9	-0.274546	0.797585	0.425111	0.998817
PfIT_140048200	70.6612	0.355793	-0.797567	0.425122	0.998817
PfIT_080022500	3541.68	-0.328499	0.797436	0.425198	0.998817
PfIT_130023200	1518.02	-0.289391	0.797263	0.425298	0.998817
PfIT_120031200	28.2598	0.427655	-0.796842	0.425543	0.998817
PfIT_060033600	1821.49	-0.290203	0.796783	0.425577	0.998817
PfIT_110022200	352.425	0.200936	-0.796475	0.425756	0.998817
PfIT_110035300	265.308	0.449974	-0.795397	0.426383	0.998817
PfIT_080019500	1010	-0.324465	0.795286	0.426447	0.998817
PfIT_090037400	17.745	0.601579	-0.795195	0.4265	0.998817
PfIT_100010000	48.5801	0.614272	-0.795053	0.426583	0.998817
PfIT_050034900	379.808	0.509244	-0.795013	0.426606	0.998817
PfIT_140051200	7885.41	-0.229836	0.794887	0.426679	0.998817
PfIT_140064800	78.3386	0.356609	-0.794294	0.427024	0.998817
PfIT_020015400	462.503	-0.248947	0.793954	0.427222	0.998817
PfIT_080010800	31.8488	0.553156	-0.793827	0.427296	0.998817
PfIT_060023500	70.3012	0.526072	-0.793823	0.427299	0.998817
PfIT_060034100	144.685	0.536288	-0.793575	0.427443	0.998817
PfIT_100037500	3246.62	-0.259989	0.79311	0.427713	0.998817
PfIT_140040500	178.425	0.283868	-0.793065	0.42774	0.998817
PfIT_130072000	158.05	-0.262744	0.792967	0.427797	0.998817
PfIT_140010900	5.2086	-0.662793	0.792943	0.427811	0.998817
PfIT_060012800	3729.26	-0.291104	0.792792	0.427899	0.998817
PfIT_120026400	238.69	0.349253	-0.792546	0.428042	0.998817
PfIT_110049500	75.714	-0.257159	0.792322	0.428173	0.998817
PfIT_070033800	114.925	0.394124	-0.792305	0.428183	0.998817
PfIT_120047800	44.5596	0.651452	-0.792285	0.428195	0.998817
PfIT_140053100	83.414	0.46266	-0.792239	0.428221	0.998817
PfIT_140035500	321.499	0.24857	-0.791911	0.428413	0.998817
PfIT_020018200	98.5373	-0.432618	0.791719	0.428525	0.998817
PfIT_090029500	11.4257	0.471324	-0.791499	0.428653	0.998817
PfIT_050029800	75.2966	0.465926	-0.791425	0.428696	0.998817
PfIT_020011100	1755.73	0.332333	-0.791332	0.42875	0.998817
PfIT_110039900	453.965	-0.275001	0.790993	0.428948	0.998817
PfIT_130017900	114.169	0.444712	-0.790578	0.42919	0.998817
PfIT_120050900	9.05996	-0.591406	0.79002	0.429516	0.998817
PfIT_050014600	5312.84	-0.260839	0.789846	0.429618	0.998817
PfIT_120049200	255.364	0.402442	-0.789645	0.429735	0.998817
PfIT_140069400	18.2148	-0.506372	0.789446	0.429851	0.998817
PfIT_030028000	34.5139	0.509424	-0.789231	0.429977	0.998817
PfIT_140045000	409.79	-0.331676	0.789108	0.430049	0.998817
PfIT_120052200	43.8762	0.571911	-0.789097	0.430055	0.998817
PfIT_140023300	9.13795	-0.5536	0.789026	0.430097	0.998817
PfIT_020014100	332.112	0.311408	-0.788425	0.430448	0.998817
PfIT_080018300	8183.16	-0.283522	0.788233	0.43056	0.998817
PfIT_050032700	7938.84	-0.249837	0.787733	0.430853	0.998817
PfIT_110029000	425.848	-0.356339	0.787265	0.431127	0.998817
PfIT_140033700	115.665	0.561976	-0.78702	0.43127	0.998817
PfIT_030011200	125.993	0.490518	-0.786785	0.431408	0.998817
PfIT_110028400	1245.18	0.207705	-0.786752	0.431427	0.998817
PfIT_090029600	14.151	0.434052	-0.786305	0.431689	0.998817
PfIT_100025300	121.589	0.490083	-0.78605	0.431838	0.998817
PfIT_060017300	316.754	0.443395	-0.786007	0.431863	0.998817
PfIT_020014300	161.655	0.549199	-0.785591	0.432107	0.998817
PfIT_070025200	1441.02	0.186473	-0.78545	0.43219	0.998817
PfIT_020012200	689.529	0.578438	-0.785256	0.432304	0.998817
PfIT_020016600	423.071	-0.202531	0.785156	0.432362	0.998817
PfIT_140061800	269.388	0.259224	-0.784424	0.432792	0.998817
PfIT_050011700	4.69521	0.855589	-0.784319	0.432853	0.998817
PfIT_120041300	613.495	-0.252961	0.784059	0.433005	0.998817
PfIT_120046600	11.9572	0.589777	-0.784013	0.433032	0.998817
PfIT_120041200	24.7441	0.418858	-0.783528	0.433317	0.998817
PfIT_050015300	154.588	0.499815	-0.781873	0.434289	0.998817
PfIT_070012700	147.722	0.394084	-0.78171	0.434385	0.998817
PfIT_140063100	259.972	-0.304345	0.781641	0.434425	0.998817
PfIT_090040200	188.402	0.326394	-0.781542	0.434484	0.998817
PfIT_030017400:tRNA	2.32706	-1.24339	0.781361	0.43459	0.998817
PfIT_040018400	346.433	0.431069	-0.78114	0.43472	0.998817
PfIT_110034000	111.33	0.328067	-0.781094	0.434747	0.998817
PfIT_140075000	16190.8	-0.281403	0.781073	0.43476	0.998817
PfIT_120052800	4.4983	1.30565	-0.780945	0.434835	0.998817
PfIT_110037800	1011.44	0.563174	-0.780918	0.434851	0.998817
PfIT_070032500	424.417	0.466242	-0.780846	0.434893	0.998817
PfIT_110029700	182.056	0.313312	-0.779872	0.435466	0.998817
PfIT_040012100	110.337	-0.305191	0.779869	0.435468	0.998817
PfIT_090040500	903.668	0.53728	-0.77961	0.43562	0.998817
PfIT_130077100	8.15183	-0.685392	0.779213	0.435854	0.998817
PfIT_130030700	403.98	0.559697	-0.779123	0.435908	0.998817
PfIT_120033600	61.0296	0.514334	-0.77886	0.436062	0.998817
PfIT_140030200	8917.22	-0.271125	0.778509	0.436269	0.998817
PfIT_140039100	58.8524	0.439999	-0.77787	0.436646	0.998817
PfIT_050005600	37.481	0.414704	-0.77747	0.436882	0.998817
PfIT_040016300	1.04117	1.66773	-0.777361	0.436946	0.998817
PfIT_130065300	1331.8	-0.230322	0.777095	0.437103	0.998817
PfIT_120033900	3156.36	0.205447	-0.777076	0.437114	0.998817
PfIT_090021600	180.087	0.472742	-0.776216	0.437621	0.998817
PfIT_070031600	53.6591	0.341463	-0.776012	0.437742	0.998817
PfIT_090006800	413.81	0.238494	-0.775625	0.437971	0.998817
PfIT_140033800	63.7347	0.30709	-0.77515	0.438251	0.998817
PfIT_040025000	139.32	0.494739	-0.774798	0.438459	0.998817
PfIT_110036800	5583.94	-0.283085	0.774693	0.438521	0.998817
PfIT_120024700	7.13551	-0.823389	0.773898	0.438991	0.998817
PfIT_020016400	80.9913	0.556306	-0.773599	0.439168	0.998817
PfIT_030012100	5.27582	0.797696	-0.773448	0.439257	0.998817
PfIT_130049300	46.4524	0.429242	-0.772945	0.439555	0.998817
PfIT_140057000	165.815	-0.284733	0.772799	0.439641	0.998817
PfIT_100023600	250.701	0.499317	-0.772637	0.439737	0.998817
PfIT_130028800	333.852	-0.26011	0.771878	0.440187	0.998817
PfIT_110025400	2997.01	0.191883	-0.771608	0.440347	0.998817
PfIT_120033500	3692.48	-0.282015	0.771236	0.440567	0.998817
PfIT_120017200	2321.85	-0.217444	0.771103	0.440646	0.998817
PfIT_100025500	765.454	-0.248007	0.771005	0.440704	0.998817
PfIT_080009200	2080.49	-0.304062	0.770364	0.441084	0.998817
PfIT_050007600	127.459	0.246717	-0.770305	0.441119	0.998817
PfIT_070027900	82.3193	-0.265618	0.769848	0.44139	0.998817
PfIT_110032800	14.3596	0.413363	-0.769598	0.441538	0.998817
PfIT_130022200	1125.76	-0.235717	0.769137	0.441812	0.998817
PfIT_070025500	2239.73	-0.283927	0.768728	0.442055	0.998817
PfIT_090023800	84.3165	0.442365	-0.768618	0.44212	0.998817
PfIT_020025300	7.64356	0.901622	-0.767915	0.442538	0.998817
PfIT_140079300	247.088	0.23727	-0.767452	0.442813	0.998817
PfIT_120020000	36.4416	-0.362575	0.76687	0.443159	0.998817
PfIT_060027300	226.866	-0.261738	0.766168	0.443577	0.998817
PfIT_030009600	16.4921	0.711566	-0.765665	0.443876	0.998817
PfIT_140057400	87.8136	0.357394	-0.765591	0.44392	0.998817
PfIT_140033900	95.436	0.500095	-0.765363	0.444055	0.998817
PfIT_080034000	1595.87	-0.28925	0.765282	0.444104	0.998817
PfIT_040009200	65.0662	-0.337842	0.765202	0.444151	0.998817
PfIT_120007600	150.879	0.250272	-0.765153	0.444181	0.998817
PfIT_130063100	2088.38	-0.262787	0.765042	0.444246	0.998817
PfIT_050014300	369.509	0.589558	-0.76441	0.444623	0.998817
PfIT_060022000	1833.13	-0.282395	0.764237	0.444726	0.998817
PfIT_030016000	155.675	0.237807	-0.764023	0.444853	0.998817
PfIT_070018800	619.682	-0.222525	0.76378	0.444999	0.998817
PfIT_120036900	92.7672	-0.33318	0.763498	0.445166	0.998817
PfIT_130028600	63.8224	0.405434	-0.76348	0.445177	0.998817
PfIT_100038900	341.16	0.226136	-0.763228	0.445327	0.998817
PfIT_130064600	146.013	0.32858	-0.763209	0.445339	0.998817
PfIT_110025300	53.7285	0.417175	-0.763102	0.445402	0.998817
PfIT_140025800	1677.84	-0.264968	0.763028	0.445446	0.998817
PfIT_110020600	820.13	-0.252553	0.762282	0.445892	0.998817
PfIT_130054400	39.0219	0.484282	-0.762075	0.446015	0.998817
PfIT_140022700	1106.59	-0.237195	0.761694	0.446243	0.998817
PfIT_080017700	364.887	-0.34339	0.761359	0.446443	0.998817
PfIT_100016600	2960.65	-0.246869	0.760876	0.446731	0.998817
PfIT_140070500	501.664	-0.316059	0.760521	0.446943	0.998817
PfIT_080016800	123.163	0.525003	-0.760168	0.447154	0.998817
PfIT_080029200	64.8922	0.542711	-0.759678	0.447447	0.998817
PfIT_090040100	37.5011	0.292513	-0.759421	0.447601	0.998817
PfIT_090018500	63.5498	0.391532	-0.759406	0.44761	0.998817
PfIT_140039600	13.0483	0.578739	-0.759342	0.447648	0.998817
PfIT_140008400	83.23	0.310466	-0.759238	0.44771	0.998817
PfIT_080031500	1789.2	-0.235105	0.759146	0.447765	0.998817
PfIT_100015700	1064.61	-0.276916	0.758578	0.448105	0.998817
PfIT_020012100	177.613	0.5807	-0.758471	0.448169	0.998817
PfIT_000005800	1.74368	1.40875	-0.757968	0.44847	0.998817
[truncated: 3,581 more rows]
